# Supplementary material for: Comprehensive Analysis of Temporal Alterations in Cellular Proteome of Bacillus subtilis under Curcumin Treatment
Source: PLoS One. 2015 Apr 14;10(4):e0120620. doi: 10.1371/journal.pone.0120620 (PMC4397091; doi:10.1371/journal.pone.0120620)
Supplement: S2 Table — (XLSX) [file pone.0120620.s009.xlsx]

## Sheet: LTQ-Orbitrap_peptide
Accession	Gene Symbol	Description	Coverage	Proteins	Unique Peptides	Peptides	PSMs	115/114	116/114	117/114	Sequence	PSMs	Accession	Modifications	115/114	116/114	117/114	XCorr	Charge	m/z [Da]	MH+ [Da]	?M [ppm]	RT [min]
O31635	yjcM	Uncharacterized protein YjcM OS	3.18	1	1	1	1						O31635
											yDFEHNTPLAHPk	1		N-Term(iTRAQ4plex); K13(iTRAQ4plex)				4.17	4	464.994	1856.96	1.38	31.2
P46319	licA	Lichenan-specific phosphotransferase enzyme IIA component OS	46.36	1	5	5	18	1.146	3.853	14.632			P46319
											dMAAEIIELYEk	4		N-Term(iTRAQ4plex); K12(iTRAQ4plex)	1.331	4.684	23.373	5.27	2	856.956	1712.9	1.46	58.27
											lQDAAEELSk	1		N-Term(iTRAQ4plex); K10(iTRAQ4plex)	1.71	17.387	74.357	4.25	2	696.386	1391.76	1.27	31.24
											kLQDAAEELSk	1		N-Term(iTRAQ4plex); K1(iTRAQ4plex); K11(iTRAQ4plex)	1.185	3.974	15.216	6.17	3	555.324	1663.96	-1.16	31.94
											aHHYQTELIQNEAGGEk	10		N-Term(iTRAQ4plex); K17(iTRAQ4plex)	0.686	12.518	77.278	6.15	2	1107.06	2213.12	-0.56	24.35
											sSAMEAIAAAk	2		N-Term(iTRAQ4plex); K11(iTRAQ4plex)	1.08	3.004	9.333	4.33	2	669.372	1337.74	1.86	34.77
O31820	yneN	Thioredoxin-like protein YneN OS	7.65	1	1	1	1	1.177	2.242	9.727			O31820
											gVIQDIHVGTMTk	1		N-Term(iTRAQ4plex); K13(iTRAQ4plex)	1.177	2.242	9.727	4.51	3	562.988	1686.95	2.72	36.95
P32959	pbpE	Penicillin-binding protein 4* OS	6.65	1	2	2	2	1.536	1.348	6.109			P32959
											iVSHSGGWPGYSTMMIR	1		N-Term(iTRAQ4plex)	1.34	0.988	3.521	4.64	3	675.007	2023.01	2.68	46.47
											wLPGFPYQGVTIR	1		N-Term(iTRAQ4plex)	1.76	1.839	10.6	3.04	2	839.466	1677.93	1.24	57.68
C0H3Z2	yjzH	Uncharacterized protein YjzH OS	23.44	1	1	1	1	2.076	1.115	4.214			C0H3Z2
											rPkEDYQQIIHDYAk	1		N-Term(iTRAQ4plex); K3(iTRAQ4plex); K15(iTRAQ4plex)	2.076	1.115	4.214	3.25	4	584.824	2336.27	0.01	35.11
P28368	yvyD	Putative sigma-54 modulation protein OS	35.98	1	6	6	15	1.075	1.874	6.57			P28368
											sEVHNEDMYNAIDLATNk	1		N-Term(iTRAQ4plex); K18(iTRAQ4plex)	1.005	1.699	3.707	6.45	3	784.72	2352.15	3.72	37.85
											yFDHSVDADVNVNLk	3		N-Term(iTRAQ4plex); K15(iTRAQ4plex)	1.197	2.076	6.246	6.7	3	675.35	2024.03	0.83	40.07
											mNYNIR	1		N-Term(iTRAQ4plex)	1.085	2.13	5.836	2.52	2	477.751	954.496	0.86	25.71
											gENIEVTPALkDHVER	5		N-Term(iTRAQ4plex); K11(iTRAQ4plex)	1.464	1.768	8.069	5.47	3	699.051	2095.14	-0.07	29.76
											vEVTIPMTDLALR	3		N-Term(iTRAQ4plex)	1.033	1.861	5.163	4.39	2	801.458	1601.91	2.25	51.84
											gENIEVTPALk	2		N-Term(iTRAQ4plex); K11(iTRAQ4plex)	1.429	1.968	6.64	4.12	2	729.924	1458.84	-0.11	30.7
O32201	liaH	Protein LiaH OS	71.56	1	24	24	99	5.356	6.632	16.069			O32201
											dmFVASVHEGLDk	1		N-Term(iTRAQ4plex); M2(Oxidation); K13(iTRAQ4plex)	2.232	2.492	6.518	4.65	3	584.635	1751.89	0.74	32.59
											vmLNQYVR	2		N-Term(iTRAQ4plex); M2(Oxidation)	2.871	3.675	9.251	2.46	2	591.826	1182.64	1.62	33.69
											akEHMNTTFDk	10		N-Term(iTRAQ4plex); K2(iTRAQ4plex); K11(iTRAQ4plex)	39.488	48.276	100	4.71	2	877.471	1753.93	3.99	21.21
											iENRIEEMEIR	1		N-Term(iTRAQ4plex)	1.24	1.876	2.715	2.71	2	788.417	1575.83	-0.39	37.89
											eHMNTTFDk	8		N-Term(iTRAQ4plex); K9(iTRAQ4plex)	3.417	4.756	10.476	4.1	3	470.904	1410.7	4.26	22.85
											aLTEMk	2		N-Term(iTRAQ4plex); K6(iTRAQ4plex)	8.157	8.174	29.063	2.7	2	490.788	980.57	0.67	22.7
											kYEEAAEVAGk	7		N-Term(iTRAQ4plex); K1(iTRAQ4plex); K11(iTRAQ4plex)				6.13	3	542.974	1626.91	1.35	25.85
											aSYEQANSQLADLk	4		N-Term(iTRAQ4plex); K14(iTRAQ4plex)	9.685	10.875	28.026	6.61	2	913.481	1825.95	0.18	34.63
											eQLAALETk	3		N-Term(iTRAQ4plex); K9(iTRAQ4plex)	5.544	6.538	14.799	4.28	2	645.879	1290.75	-0.75	32.17
											iDSESAYR	2		N-Term(iTRAQ4plex)	10.793	15.051	27.391	3.02	2	542.773	1084.54	-0.82	21.02
											dMFVASVHEGLDk	4		N-Term(iTRAQ4plex); K13(iTRAQ4plex)	6.155	5.481	16.533	5.16	2	868.449	1735.89	-0.73	37.86
											qHTIAYQFk	3		N-Term(iTRAQ4plex); K9(iTRAQ4plex)	15.305	23.041	44.717	3.8	2	712.401	1423.8	1.04	26.52
											nQAQLAFDAGEEELAk	1		N-Term(iTRAQ4plex); K16(iTRAQ4plex)	1.307	1.087	1.151	5.65	3	674.684	2022.04	0.16	42.51
											iEEMEIR	1		N-Term(iTRAQ4plex)	5.057	6.127	13.008	2.94	2	532.282	1063.56	-0.5	33.74
											kEFADDVEAEIEk	5		N-Term(iTRAQ4plex); K1(iTRAQ4plex); K13(iTRAQ4plex)	6.663	8.337	23.76	6.29	2	978.022	1955.04	1.85	36.68
											yEEAAEVAGkR	1		N-Term(iTRAQ4plex); K10(iTRAQ4plex)	3.008	2.98	9.725	3.27	3	504.275	1510.81	0.97	26.7
											kALTEMk	1		N-Term(iTRAQ4plex); K1(iTRAQ4plex); K7(iTRAQ4plex)	3.355	3.349	10.75	3.54	3	418.259	1252.76	-1.98	21
											tLSLQk	1		N-Term(iTRAQ4plex); K6(iTRAQ4plex)	3.08	3.165	6.729	2.6	2	489.31	977.612	-11.14	24.77
											aSYEQANSQLADLkEQLAALETk	3		N-Term(iTRAQ4plex); K14(iTRAQ4plex); K23(iTRAQ4plex)				8.7	4	739.154	2953.59	3.07	59.55
											dMFVASVHEGLDkmENPk	1		N-Term(iTRAQ4plex); K13(iTRAQ4plex); M14(Oxidation); K18(iTRAQ4plex)	3.255	4.28	11.044	3.74	4	624.572	2495.27	1.28	35.89
											vMLNQYVR	9		N-Term(iTRAQ4plex)	13.669	16.362	49.395	3.44	2	583.828	1166.65	0.84	37.04
											eFADDVEAEIEk	10		N-Term(iTRAQ4plex); K12(iTRAQ4plex)	5.481	6.281	16.325	6.04	2	841.924	1682.84	2.44	41.41
											sAEAGTELTR	3		N-Term(iTRAQ4plex)	4.3	4.891	12.363	3.94	2	589.81	1178.61	0.05	15.4
											eHMNTTFDkIDSESAYR	4		N-Term(iTRAQ4plex); K9(iTRAQ4plex)	4.096	4.838	12.187	5.9	4	583.783	2332.11	0.05	32.86
											dMESDIAk	3		N-Term(iTRAQ4plex); K8(iTRAQ4plex)	12.604	14.927	48.757	3.51	2	598.807	1196.61	-0.45	23.28
											dMFVASVHEGLDkMENPk	4		N-Term(iTRAQ4plex); K13(iTRAQ4plex); K18(iTRAQ4plex)	8.257	9.789	40.657	7.05	3	827.096	2479.27	2.03	46.71
											kNQAQLAFDAGEEELAk	5		N-Term(iTRAQ4plex); K1(iTRAQ4plex); K17(iTRAQ4plex)	15.979	25.617	52.592	7.75	2	1147.62	2294.24	0.99	41.46
O32076	yuaG	Uncharacterized protein YuaG OS	15.32	1	7	7	11	0.836	1.219	4.957			O32076
											sILGSMTVEEIYk	1		N-Term(iTRAQ4plex); K13(iTRAQ4plex)	0.917	0.785	1.246	4.03	3	586.659	1757.96	1.29	51.78
											eVLEGHLR	2		N-Term(iTRAQ4plex)	0.853	1.023	2.474	3.17	3	366.212	1096.62	-0.63	22.64
											aNADQAYDLETAR	1		N-Term(iTRAQ4plex)	0.721	1.403	6.691	5.4	2	791.384	1581.76	-1.44	27.18
											iGGSIGEIATAAEQFLGk	2		N-Term(iTRAQ4plex); K18(iTRAQ4plex)				5.17	3	684.053	2050.14	0.36	77.5
											qLAEADAk	1		N-Term(iTRAQ4plex); K8(iTRAQ4plex)	0.654	1.104	3.914	3.22	2	567.324	1133.64	-0.06	15.32
											akGETEAEVIR	3		N-Term(iTRAQ4plex); K2(iTRAQ4plex)	0.938	1.205	5.492	4.57	3	497.619	1490.84	0.76	19.93
											qYDSEVk	1		N-Term(iTRAQ4plex); K7(iTRAQ4plex)	0.761	1.407	4.985	2.74	2	578.808	1156.61	-0.76	15.14
P40739	bglP	PTS system beta-glucoside-specific EIIBCA component OS	14.29	1	8	8	10	1.108	0.753	3.098			P40739
											fNLHDNAk	1		N-Term(iTRAQ4plex); K8(iTRAQ4plex)	0.914	0.582	2.775	3.8	3	416.231	1246.68	-0.18	22.78
											eIIHSPIkGEVk	1		N-Term(iTRAQ4plex); K8(iTRAQ4plex); K12(iTRAQ4plex)	1.235	0.454	4.783	4.5	3	594.703	1782.09	5.01	27.76
											dGVFSAGVMGk	2		N-Term(iTRAQ4plex); K11(iTRAQ4plex)	1.129	1.057	1.904	2.86	2	678.366	1355.73	1.7	35.45
											gSVTTIFk	2		N-Term(iTRAQ4plex); K8(iTRAQ4plex)	1.077	0.75	3.499	3.29	2	570.849	1140.69	4.38	32.49
											vYQAIVR	1		N-Term(iTRAQ4plex)	1.24	0.616	3.22	2.47	2	496.804	992.601	0.41	29.69
											dILQLVGGEENVQR	1		N-Term(iTRAQ4plex)	1.128	0.637	2.392	4.47	2	857.468	1713.93	1.69	45.25
											lEGQWFTAHIk	1		N-Term(iTRAQ4plex); K11(iTRAQ4plex)	1.139	1.233	2.951	4.63	3	539.973	1617.9	3.19	45.15
											gFAIEPEEGEVVSPVR	1		N-Term(iTRAQ4plex)	0.952	0.664	2.993	4.86	2	929.989	1858.97	1.79	41.18
P28015	spoVG	Putative septation protein SpoVG OS	42.27	1	4	4	16	0.959	1.508	4.493			P28015
											gkIQDAVLNEYHR	2		N-Term(iTRAQ4plex); K2(iTRAQ4plex)	0.896	0.515	3.524	4.95	4	458.508	1831.01	1.66	31.87
											dITHPINSSTR	3		N-Term(iTRAQ4plex)	0.924	2.001	6.088	4.29	3	462.25	1384.73	3.04	18.6
											aIASITLDHEFVVHDIR	6		N-Term(iTRAQ4plex)	1.039	1.687	5.212	8.39	3	694.053	2080.14	6.69	44.92
											iQDAVLNEYHR	5		N-Term(iTRAQ4plex)	0.987	1.581	2.918	5.43	3	501.267	1501.79	-0.24	31.2
O34660	dhaS	Putative aldehyde dehydrogenase DhaS OS	21.01	1	8	8	22	1.365	1.944	6.37			O34660
											iTGQTIPVSGAYFNYTR	2		N-Term(iTRAQ4plex)	1.64	4.215	13.372	4.3	2	1016.54	2032.07	4.39	47.35
											dQYDEVVDEMASYAESLR	3		N-Term(iTRAQ4plex)	2.021	2.944	11.552	5.56	2	1132.52	2264.03	8.45	69.15
											iAFTGSTEIGkk	1		N-Term(iTRAQ4plex); K11(iTRAQ4plex); K12(iTRAQ4plex)	1.513	2.236	7.005	4.82	3	562.005	1684	0.26	31.43
											lADLMEEHk	1		N-Term(iTRAQ4plex); K9(iTRAQ4plex)	0.922	1.037	2.637	2.97	3	458.584	1373.74	2.32	35.34
											aNHSEYGLAAGLWTENVk	2		N-Term(iTRAQ4plex); K18(iTRAQ4plex)	1.12	0.892	2.391	5.46	3	750.061	2248.17	3.43	44.77
											vLSYIQk	2		N-Term(iTRAQ4plex); K7(iTRAQ4plex)	1.49	2.651	6.773	3.3	2	569.857	1138.71	0.12	36.16
											sPNILLPDANLkk	2		N-Term(iTRAQ4plex); K12(iTRAQ4plex); K13(iTRAQ4plex)	1.79	2.638	13.337	5.43	3	619.052	1855.14	2.09	37.67
											dTQIGPLVSk	9		N-Term(iTRAQ4plex); K10(iTRAQ4plex)	1.3	1.88	6.667	4.16	2	673.399	1345.79	-1.97	28.97
P12310	gdh	Glucose 1-dehydrogenase OS	5.36	1	1	1	1	0.925	0.249	1.834			P12310
											aGGEAVVVQGDVTk	1		N-Term(iTRAQ4plex); K14(iTRAQ4plex)	0.925	0.249	1.834	2.25	2	809.456	1617.91	0.08	28.54
P46318	licB	Lichenan-specific phosphotransferase enzyme IIB component OS	42.16	1	3	3	7	0.997	2.559	7.581			P46318
											aDVLLLGPQVR	3		N-Term(iTRAQ4plex)	1.083	1.954	5.218	3.88	2	662.907	1324.81	-0.21	44.56
											sAQEQGkDYTIWAVSGDSVQNHIDk	1		N-Term(iTRAQ4plex); K7(iTRAQ4plex); K25(iTRAQ4plex)				7.18	3	1070.22	3208.63	2.23	39.82
											yMLPQLk	3		N-Term(iTRAQ4plex); K7(iTRAQ4plex)	0.944	4.97	18.817	2.86	2	590.855	1180.7	1.55	41.02
O07603	yhfE	Putative aminopeptidase YhfE OS	30.35	1	8	8	14	1.427	1.408	4.428			O07603
											nQENMEIR	1		N-Term(iTRAQ4plex)	1.641	1.93	4.928	3.57	2	589.291	1177.57	-0.82	17.22
											gGLIATLPGR	2		N-Term(iTRAQ4plex)	1.591	1.345	5.485	3.32	2	549.842	1098.68	0.78	35.97
											mLTAHVDTLGAMVk	3		N-Term(iTRAQ4plex); K14(iTRAQ4plex)	1.316	1.608	4.45	5.54	3	592.332	1774.98	1.68	42.04
											kTMELIk	2		N-Term(iTRAQ4plex); K1(iTRAQ4plex); K7(iTRAQ4plex)	1.113	0.828	2.404	3.88	3	432.276	1294.81	0.57	26.29
											kHLVQLAEk	1		N-Term(iTRAQ4plex); K1(iTRAQ4plex); K9(iTRAQ4plex)	1.418	1.328	3.596	3.85	3	499.987	1497.95	-0.62	22.92
											dASGPYHYQLR	3		N-Term(iTRAQ4plex)	1.335	1.78	8.187	4.22	2	725.865	1450.72	2.42	26.24
											sGHDIVHGLIGPGIDASHAFER	1		N-Term(iTRAQ4plex)	1.434	1.169	3.079	7.25	3	810.42	2429.24	0.06	42.95
											eLVSIPSPTGNTYEVINYIESLLk	1		N-Term(iTRAQ4plex); K24(iTRAQ4plex)		1.276		3.22	3	989.882	2967.63	4.72	79.98
O32200	liaG	Protein LiaG OS	4.48	1	1	1	1	5.848	14.535	33.171			O32200
											sDISAGISGDSGk	1		N-Term(iTRAQ4plex); K13(iTRAQ4plex)	5.848	14.535	33.171	4.02	2	741.388	1481.77	0.31	23.63
O32075	yuaI	Uncharacterized N-acetyltransferase YuaI OS	7.51	1	1	1	1	0.674	1.22	4.88			O32075
											gSVFGFASFGPIR	1		N-Term(iTRAQ4plex)	0.674	1.22	4.88	3.47	2	743.402	1485.8	0.19	57.59
P46317	licC	Lichenan permease IIC component OS	2.43	1	1	1	1	1.081	2.077	5.956			P46317
											iAFQAGEELPk	1		N-Term(iTRAQ4plex); K11(iTRAQ4plex)	1.081	2.077	5.956	4.97	2	745.926	1490.85	-0.33	39.17
P54423	wprA	Cell wall-associated protease OS	14.65	1	14	14	30	0.645	1.629	5.432			P54423
											yVMSVGATNR	2		N-Term(iTRAQ4plex)	0.363	2.058	6.788	3.45	2	621.328	1241.65	5.17	29.54
											vTPGATDIQk	7		N-Term(iTRAQ4plex); K10(iTRAQ4plex)	0.67	1.916	5.75	3.93	2	659.384	1317.76	-0.4	23.15
											sEVIFPYAWSGPYYVk	2		N-Term(iTRAQ4plex); K16(iTRAQ4plex)	0.442	1.21	4.225	3.03	2	1097.58	2194.16	4.54	59.68
											vNkLESTQTAVR	1		N-Term(iTRAQ4plex); K3(iTRAQ4plex)	1.287	1.664	5.341	3.25	3	545.322	1633.95	1.5	22.92
											yEPANTLLSk	4		N-Term(iTRAQ4plex); K10(iTRAQ4plex)	0.431	1.42	4.247	4.32	2	712.404	1423.8	-2.5	33.39
											rTEVEDMLk	1		N-Term(iTRAQ4plex); K9(iTRAQ4plex)	0.563	1.422	5.265	4.66	3	470.262	1408.77	-0.45	29.14
											aGTVLYVTAVDTDkk	1		N-Term(iTRAQ4plex); K14(iTRAQ4plex); K15(iTRAQ4plex)	0.488	0.94	1.476	6.67	3	671.724	2013.16	-0.54	33.21
											tPGVDWHSGYGR	3		N-Term(iTRAQ4plex)	0.859	1.065	2.887	4.55	3	492.579	1475.72	4.56	28.59
											tEVEDMLkk	1		N-Term(iTRAQ4plex); K8(iTRAQ4plex); K9(iTRAQ4plex)	0.677	1.197	2.877	4.34	3	508.961	1524.87	0.9	30.88
											sFTAEDGk	1		N-Term(iTRAQ4plex); K8(iTRAQ4plex)	0.569	2.08	5.404	3.35	2	571.8	1142.59	-0.87	17.55
											sFTAEDGkSEVIFPYAWSGPYYVk	1		N-Term(iTRAQ4plex); K8(iTRAQ4plex); K24(iTRAQ4plex)		1.366	4.092	6.75	3	1058.55	3173.63	4.22	57.6
											aLkDETFEMYR	3		N-Term(iTRAQ4plex); K3(iTRAQ4plex)	0.44	1.417	5.814	4.5	2	845.941	1690.87	1.85	36.22
											vLEFALk	2		N-Term(iTRAQ4plex); K7(iTRAQ4plex)	0.736	1.085	1.822	2.7	2	554.354	1107.7	-0.82	45.34
											tDLGHNFVGR	1		N-Term(iTRAQ4plex)	0.505	1.908	5.438	4.08	3	420.559	1259.66	1.43	25.14
O34468	ylbP	Uncharacterized N-acetyltransferase YlbP OS	10.63	1	2	2	3	1.083	1.819	5.258			O34468
											aLVEFAk	2		N-Term(iTRAQ4plex); K7(iTRAQ4plex)	1.195	1.754	5.336	2.74	2	533.33	1065.65	-1.24	33.68
											lEVLPGYQNR	1		N-Term(iTRAQ4plex)	0.863	1.933	5.224	2.9	2	666.873	1332.74	-0.97	37.22
P39738	fliD	Flagellar hook-associated protein 2 OS	1.81	1	1	1	1	0.822	0.701	2.52			P39738
											gHLEINEEk	1		N-Term(iTRAQ4plex); K9(iTRAQ4plex)	0.822	0.701	2.52	3.87	3	452.917	1356.74	1.12	22.24
O34759	ydjO	Uncharacterized protein YdjO OS	17.39	1	1	1	2	0.603	1.07	3.494			O34759
											sLVNLQNNSQTk	2		N-Term(iTRAQ4plex); K12(iTRAQ4plex)	0.531	1.194	3.494	4.77	2	817.463	1633.92	4.4	25.78
P94532	cstA	Carbon starvation protein A homolog OS	2.68	1	1	1	1						P94532
											yLIQDFFGEVYkPLkk	1		N-Term(iTRAQ4plex); K12(iTRAQ4plex); K15(iTRAQ4plex); K16(iTRAQ4plex)				4.63	4	641.882	2564.51	2.94	59.83
P39138	rocF	Arginase OS	29.39	1	6	6	11	0.985	1.288	3.618			P39138
											ikPENVVIIGAR	3		N-Term(iTRAQ4plex); K2(iTRAQ4plex)	0.954	1.123	4.168	5.61	3	533.006	1597	-0.15	34.89
											tISVIGMPMDLGQAR	1		N-Term(iTRAQ4plex)	1.206	1.053	2.343	3.66	2	866.966	1732.92	2.1	52.55
											lSDMGYTVEDLGDIPINR	2		N-Term(iTRAQ4plex)	1.25	1.618	4.024	5.75	2	1076.54	2152.08	2.61	54.11
											tAVELVESLLGk	1		N-Term(iTRAQ4plex); K12(iTRAQ4plex)	0.755	1.236	3.516	4.6	2	773.969	1546.93	0.63	75.93
											kFPLVLGGDHSIAIGTLAGTAk	3		N-Term(iTRAQ4plex); K1(iTRAQ4plex); K22(iTRAQ4plex)	0.723	1.245	4.767	7.87	3	866.853	2598.54	3.4	49.01
											ikNDEELk	1		N-Term(iTRAQ4plex); K2(iTRAQ4plex); K8(iTRAQ4plex)	1.258	1.801	5.421	3.2	3	474.285	1420.84	1.33	21.61
O31601	yjbC	Putative acetyltransferase YjbC OS	8.33	1	2	2	2	0.865	1.336	3.734			O31601
											aHMEALLk	1		N-Term(iTRAQ4plex); K8(iTRAQ4plex)	0.955	1.294	3.717	3.84	3	400.905	1200.7	0.18	28.97
											wYGESYEk	1		N-Term(iTRAQ4plex); K8(iTRAQ4plex)	0.774	1.377	3.752	3.16	2	675.334	1349.66	0.05	31.71
P40740	bglH	Aryl-phospho-beta-D-glucosidase BglH OS	29.64	1	12	12	29	1.482	0.724	1.741			P40740
											sGGNLLGGVk	3		N-Term(iTRAQ4plex); K10(iTRAQ4plex)	1.411	0.746	1.646	4.63	2	595.363	1189.72	3.75	28.52
											tLFFSDVQAR	3		N-Term(iTRAQ4plex)	1.526	0.707	1.662	3.57	2	664.361	1327.72	2.19	43.95
											fYDDLFDELLk	1		N-Term(iTRAQ4plex); K11(iTRAQ4plex)	1.583	0.76	1.777	4.6	2	853.452	1705.9	2.79	66.87
											gAYPGYMk	3		N-Term(iTRAQ4plex); K8(iTRAQ4plex)	1.643	0.637	2.999	3.24	2	587.811	1174.61	-2.42	24.4
											vEEDGTIQDDYR	1		N-Term(iTRAQ4plex)	1.538	0.5	1.268	4.43	2	792.368	1583.73	-0.6	26.53
											hHIEPVVTISHYEMPLGLVk	2		N-Term(iTRAQ4plex); K20(iTRAQ4plex)	1.323	0.683	2.041	8.22	3	863.15	2587.43	1.27	47.03
											kTLFFSDVQAR	1		N-Term(iTRAQ4plex); K1(iTRAQ4plex)	1.595	0.759	2.047	5.99	3	533.974	1599.91	-1.33	36.4
											tSIAWTR	2		N-Term(iTRAQ4plex)	1.301	0.718	1.558	2.6	2	489.779	978.551	2.51	28.7
											iTLNTLYDR	4		N-Term(iTRAQ4plex)	1.281	0.67	1.484	3.7	2	626.854	1252.7	-0.46	42.5
											sSEWGWQIDPk	3		N-Term(iTRAQ4plex); K11(iTRAQ4plex)	1.265	0.555	1.356	3.76	2	810.917	1620.83	0.24	43.96
											rFPEGFLWGGAVAANQVEGAYNEGGk	5		N-Term(iTRAQ4plex); K26(iTRAQ4plex)	2.296	1.079	2.248	8.65	3	1004.85	3012.53	1.87	55.15
											ykEDIALFAEMGFk	1		N-Term(iTRAQ4plex); K2(iTRAQ4plex); K14(iTRAQ4plex)	0.632	0.884	0.593	3.05	2	1047.57	2094.14	2.7	58.37
O34949	ykoM	Uncharacterized HTH-type transcriptional regulator YkoM OS	63.64	1	8	8	12	1.321	3.759	8.021			O34949
											eHGFNPTEFAVLELLYTR	1		N-Term(iTRAQ4plex)				5.48	3	760.733	2280.18	2.95	70.18
											aFSGLSPDEQDQLIVLLk	2		N-Term(iTRAQ4plex); K18(iTRAQ4plex)	0.94	1.262	1.219	5.11	3	754.428	2261.27	3.38	59.28
											gNEYLDk	1		N-Term(iTRAQ4plex); K7(iTRAQ4plex)	1.067	3.786	8.264	2.97	2	563.803	1126.6	-0.18	20.02
											lLLVSGNVTYVIDkLER	2		N-Term(iTRAQ4plex); K14(iTRAQ4plex)	1.683	5.228	11.654	5.64	3	740.784	2220.34	7.07	66.97
											aGIHSQHLLFR	2		N-Term(iTRAQ4plex)	1.33	3.016	10.602	5.42	4	356.458	1422.81	1.93	29.2
											iYPIHALR	2		N-Term(iTRAQ4plex)	1.252	3.387	7.991	3.65	3	376.234	1126.69	0.99	33.8
											sVYAHLTDkGNEYLDk	1		N-Term(iTRAQ4plex); K9(iTRAQ4plex); K16(iTRAQ4plex)	1.508	3.375	7.25	4.75	3	762.41	2285.22	1	34.53
											lSFNEEEVER	1		N-Term(iTRAQ4plex)	1.192	5.07	9.717	4.6	2	698.348	1395.69	0.62	32.64
P23451	fliK	Probable flagellar hook-length control protein OS	4.72	1	2	2	2	0.78	1.176	3.422			P23451
											lNPEHLGFVTIk	1		N-Term(iTRAQ4plex); K12(iTRAQ4plex)	0.884	1.034	2.663	4.4	3	552.663	1655.98	1.64	44.85
											sGLQMLFSGYR	1		N-Term(iTRAQ4plex)	0.676	1.319	4.181	3.08	2	701.867	1402.73	0.17	54.26
P45693	spoVS	Stage V sporulation protein S OS	38.37	1	2	2	19	1.097	2.593	6.1			P45693
											gAAEIQAIGAGALNQAVk	12		N-Term(iTRAQ4plex); K18(iTRAQ4plex)	0.863	1.979	3.703	7.05	3	657.384	1970.14	5.34	45.33
											sSPNSVAGALAGVLR	7		N-Term(iTRAQ4plex)	0.767	6.402	15.36	5.26	2	771.94	1542.87	0.49	51.31
O34743	ylbA	Uncharacterized protein YlbA OS	43.33	1	4	4	7	1.067	2.195	4.998			O34743
											hYYPHGVEYGETEEFPVQVVTk	1		N-Term(iTRAQ4plex); K22(iTRAQ4plex)	0.758	4.789	10.117	8.03	3	966.157	2896.46	5.34	41.49
											aVIQLMSPLLGk	4		N-Term(iTRAQ4plex); K12(iTRAQ4plex)	1.063	1.17	3.789	4.12	2	779.489	1557.97	3.72	57.35
											fTESGLEGVk	1		N-Term(iTRAQ4plex); K10(iTRAQ4plex)	0.811	1.37	2.661	4.32	2	677.876	1354.74	-0.57	33.54
											aGQWDYER	1		N-Term(iTRAQ4plex)	0.8	1.286	1.892	2.62	2	584.779	1168.55	-0.25	25.38
P39634	rocA	1-pyrroline-5-carboxylate dehydrogenase OS	5.44	1	2	2	2	1.143	1.409	3.488			P39634
											aVIHQDVYDEVVEk	1		N-Term(iTRAQ4plex); K14(iTRAQ4plex)	0.937	1.139	1.795	5.23	3	644.682	1932.03	-0.32	34.69
											aGGPDYLILHMQAk	1		N-Term(iTRAQ4plex); K14(iTRAQ4plex)	1.349	1.679	5.181	5.11	3	601.336	1801.99	2.56	42.94
P54155	msrB	Peptide methionine sulfoxide reductase MsrB OS	16.78	1	2	2	7	0.985	1.607	3.819			P54155
											lDTSHGMIR	4		N-Term(iTRAQ4plex)	0.931	1.465	3.096	4	3	391.878	1173.62	1.61	23.7
											lkEEGYESYLHLFNk	3		N-Term(iTRAQ4plex); K2(iTRAQ4plex); K15(iTRAQ4plex)	1.063	2.186	5.056	6.48	3	768.086	2302.24	-0.17	48.16
P05306	sacP	PTS system sucrose-specific EIIBC component OS	4.34	1	1	1	3	1.395	1.33	1.487			P05306
											gAFSSSGQYQIIFGTGLVNk	3		N-Term(iTRAQ4plex); K20(iTRAQ4plex)				4.87	3	788.096	2362.27	3.45	54.5
P42297	yxiE	Universal stress protein YxiE OS	45.27	1	5	5	10	1.195	0.95	2.341			P42297
											aLDAAVHLAk	2		N-Term(iTRAQ4plex); K10(iTRAQ4plex)	1.214	1.051	2.76	4.41	2	648.898	1296.79	0.89	32.9
											eAVVTTSSLTGIVYVPEHFIDEIR	1		N-Term(iTRAQ4plex)	0.399	1.1	1.652	7.52	3	940.511	2819.52	7.9	68.82
											gVSLIVVGSR	3		N-Term(iTRAQ4plex)	1.41	1.04	2.681	4.02	2	565.854	1130.7	-0.4	37.76
											eMMLGSVSHk	2		N-Term(iTRAQ4plex); K10(iTRAQ4plex)	1.275	0.985	2.831	5.19	3	469.584	1406.74	0.93	27.52
											mLVAIDGSDMSAk	2		N-Term(iTRAQ4plex); K13(iTRAQ4plex)	1.337	1.208	2.394	4.9	2	813.429	1625.85	1.82	38.19
P46913	qcrC	Menaquinol-cytochrome c reductase cytochrome b/c subunit OS	4.71	1	1	1	1	1.085	1.681	3.686			P46913
											eADIDTNAEGYk	1		N-Term(iTRAQ4plex); K12(iTRAQ4plex)	1.085	1.681	3.686	4.2	2	807.399	1613.79	0.29	25.96
O31684	ykvS	Uncharacterized protein YkvS OS	34.43	1	2	2	5	0.915	1.625	3.815			O31684
											dLELDSLTVVNHk	2		N-Term(iTRAQ4plex); K13(iTRAQ4plex)	0.998	1.617	5.092	7.2	3	591	1770.98	0.07	40.03
											vGNVIEFk	3		N-Term(iTRAQ4plex); K8(iTRAQ4plex)	0.874	1.735	3.776	3.53	2	597.359	1193.71	-2.01	35.94
O34934	ppnK2	Probable inorganic polyphosphate/ATP-NAD kinase 2 OS	21.35	1	4	4	13	1.302	2.189	3.9			O34934
											vVQDGNEHPIIGLDNEALSTR	2		N-Term(iTRAQ4plex)	1.83	3.731	5.867	6.96	3	807.756	2421.25	1.53	37.67
											nVYFFHk	2		N-Term(iTRAQ4plex); K7(iTRAQ4plex)	1.464	3.744	7.208	3.63	3	414.901	1242.69	2.06	32.86
											tLGSPFVLSSDR	2		N-Term(iTRAQ4plex)	1.003	1.33	1.669	3.61	2	711.889	1422.77	0.06	42.36
											gDGMIISTPTGSTAYNk	7		N-Term(iTRAQ4plex); K17(iTRAQ4plex)	1.254	2.955	8.701	4.69	2	1001.01	2001.02	-0.12	34.63
P54173	ypjQ	Uncharacterized protein YpjQ OS	28.25	1	3	3	5	0.988	1.477	3.17			P54173
											iAHTHQDLQDEEkEQDEkPVVS	1		N-Term(iTRAQ4plex); K13(iTRAQ4plex); K18(iTRAQ4plex)				2.99	4	752.642	3007.54	3.73	25.32
											gVMIEDIAR	2		N-Term(iTRAQ4plex)	1.117	1.268	3.115	3.78	2	574.316	1147.62	-1.77	33.59
											eIIHAVLTGLALDQLAEQk	2		N-Term(iTRAQ4plex); K19(iTRAQ4plex)	0.684	1.452	2.351	8.35	3	784.129	2350.37	5.42	64.03
C0SPB1	yukJ	Uncharacterized protein YukJ OS	8	1	2	2	3	0.997	1.899	4.625			C0SPB1
											fGPEQAADk	1		N-Term(iTRAQ4plex); K9(iTRAQ4plex)	1.053	1.914	4.053	3.13	2	625.834	1250.66	-0.92	22.32
											tPVYIFGSk	2		N-Term(iTRAQ4plex); K9(iTRAQ4plex)	1.079	2.657	7.828	3.13	2	650.382	1299.76	0.51	40.21
P42418	iolH	Protein IolH OS	23.88	1	5	5	8	0.936	2.147	4.802			P42418
											lNLQAHPYDFIETHk	2		N-Term(iTRAQ4plex); K15(iTRAQ4plex)	0.747	3.032	7.456	6.25	4	529.289	2114.13	2.89	42.4
											vTVHQHLDIGQGEVDFDTIFR	1		N-Term(iTRAQ4plex)	1.127	1.125	2.785	5.47	3	857.445	2570.32	2.7	52.98
											lTHVLFADTYNHk	2		N-Term(iTRAQ4plex); K13(iTRAQ4plex)	1.167	1.727	2.867	6.59	3	616.343	1847.01	4.12	37.49
											dDLTLEEMVYk	1		N-Term(iTRAQ4plex); K11(iTRAQ4plex)	0.987	2.616	7.193	5.1	2	822.426	1643.84	-0.11	44.47
											lALDPSMYR	2		N-Term(iTRAQ4plex)	0.92	1.785	3.779	2.73	2	605.323	1209.64	-1.99	40.82
P50848	ypwA	Putative metalloprotease YpwA OS	46.31	1	24	24	46	1.271	1.51	3.16			P50848
											aINESkPSFIR	4		N-Term(iTRAQ4plex); K6(iTRAQ4plex)	1.309	1.214	2.867	3.86	3	517.304	1549.9	2.66	29.54
											kkPLDIIk	1		N-Term(iTRAQ4plex); K1(iTRAQ4plex); K2(iTRAQ4plex); K8(iTRAQ4plex)	0.85	1.204	2.718	3.14	4	383.517	1531.05	1.63	27.01
											lDETVHPFATTLNR	2		N-Term(iTRAQ4plex)	1.362	1.112	1.881	4.47	2	879.468	1757.93	-1.03	36.22
											kPLDIIkDATGEELNVR	1		N-Term(iTRAQ4plex); K1(iTRAQ4plex); K7(iTRAQ4plex)	1.696	1.997	4.852	3.33	3	781.794	2343.37	3.05	46.49
											aESIGQLSTDIFNIQTSDR	3		N-Term(iTRAQ4plex)	0.834	1.679	2.532	6.85	3	747.052	2239.14	4.31	55.37
											kIPEAEYk	1		N-Term(iTRAQ4plex); K1(iTRAQ4plex); K8(iTRAQ4plex)	1.078	1.283	2.862	4.14	3	470.618	1409.84	2.02	24.55
											dISLDDFVR	1		N-Term(iTRAQ4plex)	1.411	1.814	3.881	3.74	2	612.323	1223.64	-0.23	44.2
											sDFSLFSPYLEQLIEFNkR	2		N-Term(iTRAQ4plex); K18(iTRAQ4plex)	1.37	2.119	4.083	8.59	3	874.466	2621.38	-0.62	74.35
											iSHYSEAVALMHWDSR	1		N-Term(iTRAQ4plex)				3.68	4	512.256	2046	2.03	38.34
											vEADELTYPLHIIIR	2		N-Term(iTRAQ4plex)	1.042	1.376	2.492	5.45	3	642.702	1926.09	5.46	57.35
											kPLDIIk	1		N-Term(iTRAQ4plex); K1(iTRAQ4plex); K7(iTRAQ4plex)	1.054	1.156	2.751	3.13	3	420.287	1258.85	1.13	28.87
											yLIDYLSNk	2		N-Term(iTRAQ4plex); K9(iTRAQ4plex)	1.297	1.618	2.745	3.51	2	708.903	1416.8	0.4	49.61
											dATGEELNVR	2		N-Term(iTRAQ4plex)	1.298	1.632	2.617	3.64	2	624.321	1247.63	-0.92	23.38
											kIQEASPVQFk	2		N-Term(iTRAQ4plex); K1(iTRAQ4plex); K11(iTRAQ4plex)	1.517	1.628	4.159	5.76	3	569.679	1707.02	2.94	30.22
											mLEDLPEFDALLER	2		N-Term(iTRAQ4plex)	1.384	1.979	3.931	5.18	2	917.979	1834.95	6.91	65.48
											mkELIDVLYER	2		N-Term(iTRAQ4plex); K2(iTRAQ4plex)	1.258	2.329	3.955	4.92	3	566.325	1696.96	3.11	54.19
											iQEASPVQFk	4		N-Term(iTRAQ4plex); K10(iTRAQ4plex)	1.22	1.645	2.954	4.29	2	717.912	1434.82	-1.89	32.17
											hFWTPYYk	1		N-Term(iTRAQ4plex); K8(iTRAQ4plex)	1.157	1.8	2.685	3.69	3	477.255	1429.75	-0.41	37.42
											fDDLSEDTk	1		N-Term(iTRAQ4plex); K9(iTRAQ4plex)	1.316	2.102	3.246	3.66	2	679.339	1357.67	-0.94	27.95
											gEFHPIkQWLTEk	4		N-Term(iTRAQ4plex); K7(iTRAQ4plex); K13(iTRAQ4plex)	1.184	1.159	5.574	4.62	4	512.044	2045.16	0.59	42.72
											aIFSNEVSVEDLPSLWNQk	2		N-Term(iTRAQ4plex); K19(iTRAQ4plex)	1.802	1.799	3.851	6.17	3	822.106	2464.3	3.29	59.77
											nkHFWTPYYk	2		N-Term(iTRAQ4plex); K2(iTRAQ4plex); K10(iTRAQ4plex)	1.534	1.338	4.616	4.14	3	606.002	1815.99	0.47	34.23
											eFFDLLk	2		N-Term(iTRAQ4plex); K7(iTRAQ4plex)	1.369	1.838	3.94	3.25	2	600.35	1199.69	0.8	55.32
											eLIDVLYER	1		N-Term(iTRAQ4plex)	1.25	1.566	3.444	3.74	2	647.364	1293.72	2.61	48.03
P37569	yacH	Uncharacterized protein YacH OS	10.27	1	2	2	2	1.145	1.679	1.605			P37569
											kELESLIHQEEFENAAHVR	1		N-Term(iTRAQ4plex); K1(iTRAQ4plex)				7.58	4	642.594	2567.35	2.53	41.33
											eLESLIHQEEFENAAHVR	1		N-Term(iTRAQ4plex)	1.145	1.679	1.605	7.1	4	574.543	2295.15	1.45	45.29
O32065	ytzB	Uncharacterized protein YtzB OS	26.67	1	2	2	4	1.297	1.919	3.999			O32065
											qYVMkPYISSEk	2		N-Term(iTRAQ4plex); K5(iTRAQ4plex); K12(iTRAQ4plex)	1.162	2.003	4.494	4.77	3	635.69	1905.06	2.21	32.33
											sAFGELEQYEVMVDAk	2		N-Term(iTRAQ4plex); K16(iTRAQ4plex)	1.196	1.767	3.539	5.45	2	1052.53	2104.06	3.32	54.4
P54576	mcpC	Methyl-accepting chemotaxis protein McpC OS	5.34	1	2	2	2	1.013	1.235	2.957			P54576
											gFAFLADASGNLLAHPSNQGk	1		N-Term(iTRAQ4plex); K21(iTRAQ4plex)	0.834	1.055	2.089	7.31	3	801.761	2403.27	1.53	53.81
											kVETMLLDLENQTk	1		N-Term(iTRAQ4plex); K1(iTRAQ4plex); K14(iTRAQ4plex)	1.192	1.415	3.825	5.02	3	698.735	2094.19	3.35	51.22
O34968	yerB	Putative lipoprotein YerB OS	4.53	1	1	1	1	1.084	2.096	4.434			O34968
											gLLFQHGNVIETDWk	1		N-Term(iTRAQ4plex); K15(iTRAQ4plex)	1.084	2.096	4.434	4.6	3	682.373	2045.1	-0.73	47.79
O32174	gcvH	Glycine cleavage system H protein OS	55.91	1	5	5	18	1.079	1.644	3.645			O32174
											ySGEHEWVk	3		N-Term(iTRAQ4plex); K9(iTRAQ4plex)	0.915	1.707	3.753	3.72	2	711.866	1422.73	-0.41	23.34
											iGITHFAQSELGDIVFVELPEVGAEIk	6		N-Term(iTRAQ4plex); K27(iTRAQ4plex)		0.661	1.677	6.7	4	800.696	3199.76	3.58	74.87
											aWMIVVEPSDASEIEk	5		N-Term(iTRAQ4plex); K16(iTRAQ4plex)	0.913	1.754	3.839	4.79	2	1046.55	2092.09	3.1	49.06
											lMTAEQYEEMTQED	3		N-Term(iTRAQ4plex)	0.929	1.503	2.011	4.4	3	621.269	1861.79	-1.26	44.46
											ySGEHEWVkVEGEk	1		N-Term(iTRAQ4plex); K9(iTRAQ4plex); K14(iTRAQ4plex)	1.191	1.909	7.571	4.25	3	703.702	2109.09	-2.94	31.26
P42414	iolC	5-dehydro-2-deoxygluconokinase OS	2.15	1	1	1	1	1.241	2.138	4.304			P42414
											yTFNEEk	1		N-Term(iTRAQ4plex); K7(iTRAQ4plex)	1.241	2.138	4.304	2.77	2	609.816	1218.62	-0.44	26.6
O34669	yocH	Cell wall-binding protein YocH OS	30.66	2	6	6	11	0.821	1.02	2.282			O34669
											vIAVDPNVIPLGSk	2		N-Term(iTRAQ4plex); K14(iTRAQ4plex)	0.933	1.061	2.666	3.14	2	855.527	1710.05	4.07	46.25
											eQPkQEAVQQQPk	1		N-Term(iTRAQ4plex); K4(iTRAQ4plex); K13(iTRAQ4plex)	0.612	1.441	2.873	3.15	3	657.373	1970.1	0.08	17.17
											sDASNWGVk	2		N-Term(iTRAQ4plex); K9(iTRAQ4plex)	0.841	1.2	2.529	3.06	2	626.331	1251.65	-1.9	25.15
											lTISSEETTTTGQYTIk	1		N-Term(iTRAQ4plex); K17(iTRAQ4plex)	0.812	0.833	1.011	4.27	3	721.054	2161.15	-0.34	38.3
											gQATAANTATENAQTNAPQAAPk	3		N-Term(iTRAQ4plex); K23(iTRAQ4plex)	0.466	0.738	1.694	6.79	3	838.766	2514.28	1.49	20.95
											aEAETSVNTEEk	2		N-Term(iTRAQ4plex); K12(iTRAQ4plex)	1.183	1.287	3.605	4.22	2	798.404	1595.8	0.7	17.82
P38021	rocD	Ornithine aminotransferase OS	4.74	1	2	2	4	0.908	1.057	2.698			P38021
											gFGPMLPGIk	1		N-Term(iTRAQ4plex); K10(iTRAQ4plex)	0.828	1.142	4.582	3.85	2	652.885	1304.76	-1.3	45.73
											fAPPLIISk	3		N-Term(iTRAQ4plex); K9(iTRAQ4plex)	0.731	1.259	3.613	3.22	2	637.409	1273.81	-1.4	45.02
O32078	yuaE	Uncharacterized protein YuaE OS	66.67	1	9	9	23	0.855	2.036	4.425			O32078
											kAPSHLEPAHDFISGSQmk	1		N-Term(iTRAQ4plex); K1(iTRAQ4plex); M18(Oxidation); K19(iTRAQ4plex)				3.17	4	632.839	2528.34	2.42	27.1
											eVLDHLk	5		N-Term(iTRAQ4plex); K7(iTRAQ4plex)	0.988	1.746	4.749	3.33	2	571.346	1141.68	1.9	25.52
											vLPHPVFQELTVR	5		N-Term(iTRAQ4plex)	0.818	2.533	6.28	5.58	3	560.331	1678.98	1.46	45
											qWIDFIGHHEk	2		N-Term(iTRAQ4plex); K11(iTRAQ4plex)	0.804	1.865	5.313	4.37	4	425.232	1697.91	3.7	41.18
											eQLTAAIASLkEEDFER	1		N-Term(iTRAQ4plex); K11(iTRAQ4plex)	1.335	1.417	1.809	5.76	3	746.736	2238.19	3.5	53.87
											kAPSHLEPAHDFISGSQMk	2		N-Term(iTRAQ4plex); K1(iTRAQ4plex); K19(iTRAQ4plex)	0.799	2.355	6.508	7.83	3	838.117	2512.34	0.85	30.32
											iDMTAQk	1		N-Term(iTRAQ4plex); K7(iTRAQ4plex)	0.866	1.782	3.388	2.78	2	547.812	1094.62	5.15	24.77
											lETWNELk	2		N-Term(iTRAQ4plex); K8(iTRAQ4plex)	0.81	2.579	4.111	3.91	2	660.873	1320.74	-0.5	39.68
											eIEEkPLEVAQDR	1		N-Term(iTRAQ4plex); K5(iTRAQ4plex)	0.782	1.633	3.577	3.8	3	615.339	1844	1.07	29.53
											lNQkPSAEEWSIR	3		N-Term(iTRAQ4plex); K4(iTRAQ4plex)	0.825	2.02	3.349	4.13	3	616.006	1846	-1.11	34.95
P54617	ydjF	Phage shock protein A homolog OS	58.59	1	11	11	33	0.764	1.219	3.088			P54617
											lVSDIGELEAR	2		N-Term(iTRAQ4plex)	0.74	1.015	2.575	4.6	2	673.377	1345.75	1.28	40.57
											dIMSANINALLDk	1		N-Term(iTRAQ4plex); K13(iTRAQ4plex)	0.781	0.942	2.323	3.43	3	569.319	1705.94	1.64	51.5
											mVDQYLR	5		N-Term(iTRAQ4plex)	0.803	0.983	2.706	2.98	2	534.786	1068.56	1.76	34.49
											lSELQAANQIAATNAAQMR	4		N-Term(iTRAQ4plex)	0.772	0.723	1.175	6.91	3	715.713	2145.13	2.26	45.9
											nMNSDLAk	2		N-Term(iTRAQ4plex); K8(iTRAQ4plex)	0.739	1.133	2.689	3.19	2	590.816	1180.62	1.03	20.12
											vkAETAAVMAEEQR	4		N-Term(iTRAQ4plex); K2(iTRAQ4plex)	1.076	1.691	3.913	6.38	3	607.664	1820.98	0.54	31.83
											lGASVSSTSQSMSAFGR	9		N-Term(iTRAQ4plex)	0.623	1.296	4.485	6.39	2	908.951	1816.89	-1.98	38.59
											yDTGGSSQVDDELAALk	2		N-Term(iTRAQ4plex); K17(iTRAQ4plex)	0.741	1.615	3.71	8.58	2	1029.02	2057.03	1.72	41.88
											fkDIMSANINALLDk	1		N-Term(iTRAQ4plex); K2(iTRAQ4plex); K15(iTRAQ4plex)	0.553	0.89	2.189	6.58	3	709.076	2125.21	3.35	57.97
											aETAAVMAEEQR	2		N-Term(iTRAQ4plex)	0.713	1.218	2.905	5.18	2	725.359	1449.71	-1.29	26.14
											aLDQANAMAELNSAPQDDMADLSAk	1		N-Term(iTRAQ4plex); K25(iTRAQ4plex)	1.301	1.489	3.548	3.65	2	1439.7	2878.39	1.93	46.91
P94391	ycgN	1-pyrroline-5-carboxylate dehydrogenase 2 OS	31.84	1	11	11	20	0.709	5.931	12.516			P94391
											aGGPDYLALHMQAk	2		N-Term(iTRAQ4plex); K14(iTRAQ4plex)	0.502	10.518	26.49	5.95	3	587.319	1759.94	1	36.74
											akQEFHVGNLYFNR	1		N-Term(iTRAQ4plex); K2(iTRAQ4plex)	0.782	1.94	3.444	3.68	3	671.03	2011.08	0.14	38.89
											gVVNFVPGSGAEVGDYLVDHPk	1		N-Term(iTRAQ4plex); K22(iTRAQ4plex)	0.885	2.233	5.328	8.2	3	848.786	2544.34	3.61	49.73
											vTAkPDSADVYMGPVIDQGSYDk	1		N-Term(iTRAQ4plex); K4(iTRAQ4plex); K23(iTRAQ4plex)	1.018	1.891	1.276	5.29	3	963.497	2888.48	2.12	38.21
											aSQEHAEQAIQAAAk	4		N-Term(iTRAQ4plex); K15(iTRAQ4plex)	0.533	3.917	10.448	7.1	3	614.33	1840.98	0.64	25.32
											gYFIkPTIFADLDPk	4		N-Term(iTRAQ4plex); K5(iTRAQ4plex); K15(iTRAQ4plex)	0.361	12.889	33.003	5.86	3	719.751	2157.24	2.76	55.73
											tSLITFTGSR	2		N-Term(iTRAQ4plex)	0.202	3.844	6.586	3.17	2	613.846	1226.69	-0.46	37.7
											hEPFTNFQDQNNVEAFk	1		N-Term(iTRAQ4plex); K17(iTRAQ4plex)	0.849	2.824	3.493	6.43	3	785.055	2353.15	2.3	39.74
											lVSGGTGDDSk	1		N-Term(iTRAQ4plex); K11(iTRAQ4plex)	0.538	6.841	8.969	3.33	2	662.353	1323.7	-1.08	16.17
											vIEITESk	1		N-Term(iTRAQ4plex); K8(iTRAQ4plex)	0.883	4.554	8.405	3.16	2	603.861	1206.72	-2.51	29.46
											iVSINPADkEEVVGR	2		N-Term(iTRAQ4plex); K9(iTRAQ4plex)	0.746	8.911	12.962	4.89	3	638.703	1914.09	1.89	36.93
P81102	yodC	Putative NAD(P)H nitroreductase YodC OS	49.5	1	8	8	28	1.281	1.651	3.18			P81102
											aPSAWNLQHWHFTVFHSDESk	6		N-Term(iTRAQ4plex); K21(iTRAQ4plex)	1.009	1.228	3.328	8.29	5	563.283	2812.39	1.11	48.54
											dSAFLNASLAAMQLMIAAk	2		N-Term(iTRAQ4plex); K19(iTRAQ4plex)				6.5	3	752.077	2254.22	-0.36	70.65
											eYDTNAPISk	1		N-Term(iTRAQ4plex); K10(iTRAQ4plex)	1.245	1.733	2.584	3.98	2	713.376	1425.75	-0.79	23.23
											aELLPVAYNQk	4		N-Term(iTRAQ4plex); K11(iTRAQ4plex)	1.175	1.799	4.26	3.7	2	767.446	1533.88	-2.51	34.96
											eYDTNAPISkEELTELLDLATk	1		N-Term(iTRAQ4plex); K10(iTRAQ4plex); K22(iTRAQ4plex)	1.88	2.273	3.311	2.65	2	1463.29	2925.58	3.42	63.14
											yVPVMLISIGk	11		N-Term(iTRAQ4plex); K11(iTRAQ4plex)	1.104	1.386	2.812	3.77	2	754.465	1507.92	3.8	57.76
											qIVESSAVVAILGDLk	1		N-Term(iTRAQ4plex); K16(iTRAQ4plex)	1.12	2.215	2.851	6.58	2	965.581	1930.16	4.7	68.01
											yVPVmLISIGk	1		N-Term(iTRAQ4plex); M5(Oxidation); K11(iTRAQ4plex)	1.255	1.225	1.888	2.75	2	762.46	1523.91	1.57	49.02
											eELTELLDLATk	1		N-Term(iTRAQ4plex); K12(iTRAQ4plex)	0.676	1.554	1.59	2.78	3	554.986	1662.94	1.85	59.69
P37965	glpQ	Glycerophosphoryl diester phosphodiesterase OS	3.07	1	1	1	1	1.304	1.107	2.423			P37965
											akPQYVGLk	1		N-Term(iTRAQ4plex); K2(iTRAQ4plex); K9(iTRAQ4plex)	1.304	1.107	2.423	3.6	3	479.304	1435.9	-1.36	23.71
P37532	yaaI	Uncharacterized isochorismatase family protein YaaI OS	11.6	1	1	1	1	1.095	1.737	3.544			P37532
											aLLIVDMINNFEFDMGETLAk	1		N-Term(iTRAQ4plex); K21(iTRAQ4plex)	1.095	1.737	3.544	3.2	3	891.468	2672.39	-0.42	34.73
P94425	ycnE	Putative monooxygenase YcnE OS	89.47	1	9	9	28	1.253	2.631	5.012			P94425
											wkDEAAMk	2		N-Term(iTRAQ4plex); K2(iTRAQ4plex); K8(iTRAQ4plex)	1.211	2.146	4.751	3.28	2	705.893	1410.78	0.64	23.83
											vGEENTFVMLEk	1		N-Term(iTRAQ4plex); K12(iTRAQ4plex)	1.119	2.483	3.858	5.84	2	842.448	1683.89	0.94	40.58
											eLLSAPLDVVR	3		N-Term(iTRAQ4plex)	1.209	2.234	3.564	4.11	2	678.406	1355.8	2.08	44.46
											fHNETAHFQGFVAk	5		N-Term(iTRAQ4plex); K14(iTRAQ4plex)	1.401	4.092	6.338	6.82	3	641.006	1921	3.59	33.52
											mIVLQAYIk	4		N-Term(iTRAQ4plex); K9(iTRAQ4plex)	1.569	3.695	6.923	3.87	2	683.924	1366.84	2.32	48.97
											gkELLSAPLDVVR	5		N-Term(iTRAQ4plex); K2(iTRAQ4plex)	1.363	1.971	4.871	5.88	3	562.343	1685.02	-2.86	42.25
											rEEFLSEAQSLVQHSR	2		N-Term(iTRAQ4plex)	1.015	1.089	1.121	8.91	3	687.36	2060.07	0.49	42.81
											aEEGNAQYDLFEk	2		N-Term(iTRAQ4plex); K13(iTRAQ4plex)	1.313	3.198	6.654	6.18	2	901.447	1801.89	1.27	34.5
											eEFLSEAQSLVQHSR	4		N-Term(iTRAQ4plex)	1.329	2.055	4.657	7.59	3	635.326	1903.96	0.65	49.85
O06477	yfmS	Putative sensory transducer protein YfmS OS	24.83	1	5	5	13	0.814	0.941	2.305			O06477
											gFSVVADEIR	1		N-Term(iTRAQ4plex)	0.78	0.797	2.155	4.33	2	618.839	1236.67	0.83	41.47
											aGDPLQEGDIITDAIR	2		N-Term(iTRAQ4plex)	0.799	0.946	2.596	5.36	2	914.481	1827.95	-1.34	47.66
											gISDQSNLLGLNAAIEAAR	1		N-Term(iTRAQ4plex)	1.011	0.961	2.219	3.51	2	1029.06	2057.12	5.36	53.61
											vIGGVGLGTSLEESSk	1		N-Term(iTRAQ4plex); K16(iTRAQ4plex)	0.693	0.911	1.852	5.29	2	911.016	1821.02	1.99	40.59
											eLFGFPLIAR	8		N-Term(iTRAQ4plex)	0.619	0.797	2.12	3.75	2	653.888	1306.77	3.12	61.43
O07607	yhfI	Uncharacterized protein YhfI OS	52.87	1	7	7	23	0.95	1.517	3.012			O07607
											iTDGSHTVVYTADSSYQDSFIPFSk	2		N-Term(iTRAQ4plex); K25(iTRAQ4plex)	0.452	1.49	1.556	7.01	3	1018.5	3053.5	0.35	50.65
											eAGAGELLLTHLPHFGVHDNLRk	1		N-Term(iTRAQ4plex); K23(iTRAQ4plex)		0.921	3.561	5.32	5	563.318	2812.56	4.68	49.52
											qVGSFLGk	3		N-Term(iTRAQ4plex); K8(iTRAQ4plex)	1.138	2.226	4.203	3.16	2	562.341	1123.67	2.21	31.62
											lDAVVLSHYHHDHIADIGPLQFAk	2		N-Term(iTRAQ4plex); K24(iTRAQ4plex)	0.822	1.073	1.959	6.94	4	746.906	2984.6	1.54	48.98
											gEHTLPIYGHDADIEQFQk	4		N-Term(iTRAQ4plex); K19(iTRAQ4plex)	0.975	1.387	4.264	9.26	3	829.426	2486.26	2.94	39.4
											gIAYQPDQPLTAGPFTITFLk	9		N-Term(iTRAQ4plex); K21(iTRAQ4plex)				4.95	3	856.147	2566.43	4.32	64.07
											lFGYVPAEk	2		N-Term(iTRAQ4plex); K9(iTRAQ4plex)	1.073	1.696	2.747	2.79	2	656.381	1311.75	-0.62	40.37
P36946	rbsD	D-ribose pyranase OS	61.83	1	6	6	31	1.633	4.252	8.09			P36946
											fLENLFSEQEIEYLSHEEFk	4		N-Term(iTRAQ4plex); K20(iTRAQ4plex)	1.682	7.877	11.446	10.1	3	940.476	2819.41	3.6	66.65
											iDLSLkPGLPAFQDTAAVLAEEMAVEk	5		N-Term(iTRAQ4plex); K6(iTRAQ4plex); K27(iTRAQ4plex)	1.635	4.093	7.928	10.4	3	1096.95	3288.83	5.54	68.58
											vIAAAEIk	8		N-Term(iTRAQ4plex); K8(iTRAQ4plex)	1.601	4.276	8.745	3.61	2	551.857	1102.71	-0.9	30.35
											iLADLGHTDk	8		N-Term(iTRAQ4plex); K10(iTRAQ4plex)	1.334	4.64	9.102	4.85	3	457.6	1370.79	-1.68	30.6
											iVIADAGLPVPDGVLk	5		N-Term(iTRAQ4plex); K16(iTRAQ4plex)	1.832	5.496	11.173	5.73	2	933.073	1865.14	2.01	51.86
											iLADLGHTDkIVIADAGLPVPDGVLk	1		N-Term(iTRAQ4plex); K10(iTRAQ4plex); K26(iTRAQ4plex)	1.226	0.962	0.7	3.06	4	768.959	3072.81	3.24	60.43
P54390	ypiB	UPF0302 protein YpiB OS	5.03	1	1	1	1	1.089	1.754	3.575			P54390
											wFLNHYQLk	1		N-Term(iTRAQ4plex); K9(iTRAQ4plex)	1.089	1.754	3.575	4.3	3	512.957	1536.86	-0.37	44.62
Q796K8	pbpH	Penicillin-binding protein H OS	1.28	1	1	1	1	1.053	0.9	1.991			Q796K8
											dYWIAAHPk	1		N-Term(iTRAQ4plex); K9(iTRAQ4plex)	1.053	0.9	1.991	4.18	3	463.59	1388.76	-0.91	32.28
P50843	kduI	4-deoxy-L-threo-5-hexosulose-uronate ketol-isomerase OS	3.27	1	1	1	1	1.198	1.036	2.089			P50843
											ySVHPEQVk	1		N-Term(iTRAQ4plex); K9(iTRAQ4plex)	1.198	1.036	2.089	2.99	3	458.925	1374.76	-0.55	22.79
P42412	iolA	Methylmalonate semialdehyde dehydrogenase [acylating] OS	13.76	1	6	6	10	1.237	2.406	4.577			P42412
											eAIEIANk	1		N-Term(iTRAQ4plex); K8(iTRAQ4plex)	1.067	1.846	4.106	4.02	2	588.347	1175.69	0.19	25.2
											eDIDYAAQTAAEAFk	2		N-Term(iTRAQ4plex); K15(iTRAQ4plex)	1.276	1.596	3.263	4.63	3	644.329	1930.97	5.06	46.46
											eALGEVGR	1		N-Term(iTRAQ4plex)	0.922	1.053	1.54	2.78	2	487.773	974.539	0.6	19.87
											aISFVGSkPVGEYVYk	4		N-Term(iTRAQ4plex); K8(iTRAQ4plex); K16(iTRAQ4plex)	1.536	3.029	7.654	5.81	2	1088.62	2176.24	1.45	42.5
											lVELFEk	1		N-Term(iTRAQ4plex); K7(iTRAQ4plex)	1.279	3.359	5.841	3.17	2	583.359	1165.71	2.48	47.17
											tDQYEDVVNPATk	1		N-Term(iTRAQ4plex); K13(iTRAQ4plex)	1.154	2.281	3.539	3.8	2	884.454	1767.9	0.53	28.32
P94558	ysnA	Non-canonical purine NTP pyrophosphatase OS	40.91	1	6	6	11	1.287	1.402	2.644			P94558
											eAIIATHNPGk	4		N-Term(iTRAQ4plex); K11(iTRAQ4plex)	1.49	1.434	2.955	5.55	3	480.281	1438.83	2.64	21.77
											gEYGFGYDPIFIVk	1		N-Term(iTRAQ4plex); K14(iTRAQ4plex)	1.061	1.008	1.741	4.53	3	631.674	1893.01	2.28	59.4
											mVIADDSGLSIDNLGGRPGVYSAR	2		N-Term(iTRAQ4plex)	1.219	1.994	1.987	6	4	652.59	2607.34	2.56	48.11
											dDQANIEk	1		N-Term(iTRAQ4plex); K8(iTRAQ4plex)	1.526	1.631	2.74	3.62	2	610.821	1220.63	-0.98	15.83
											tVEGHVEGYIAEEPR	2		N-Term(iTRAQ4plex)	1.026	1.225	1.825	6.09	3	610.643	1829.92	0.17	33.18
											eFkEILEPR	1		N-Term(iTRAQ4plex); K3(iTRAQ4plex)	1.113	1.184	2.864	2.97	3	483.617	1448.84	0.56	36.53
P42100	glxK	Glycerate kinase OS	6.02	1	1	1	1	1.434	1.091	1.953			P42100
											gATADMLDVLDQNVSHFADMAEk	1		N-Term(iTRAQ4plex); K23(iTRAQ4plex)	1.434	1.091	1.953	5.17	3	922.786	2766.34	4.48	68.68
O32214	cysJ	Sulfite reductase [NADPH] flavoprotein alpha-component OS	7.77	1	2	2	2	0.963	1.053	0.969			O32214
											mQLQVMNSPFNQEQAELLNR	1		N-Term(iTRAQ4plex)	0.963	1.053	0.969	4.06	3	845.428	2534.27	3.33	54.46
											gLNEAGGGSAAPAPAAASQTGESSYSR	1		N-Term(iTRAQ4plex)				4.68	3	870.083	2608.24	0.03	25.67
O31602	spxA	Regulatory protein spx OS	64.12	1	8	8	8	1.052	1.319	2.644			O31602
											lQVGYNEDEIR	1		N-Term(iTRAQ4plex)	1.101	1.332	1.683	2.85	2	740.382	1479.76	0.74	32.27
											aWLEEHEIPFVER	1		N-Term(iTRAQ4plex)	1.167	1.288	3.713	5.5	3	600.313	1798.93	0.75	50.36
											lNVNVESMPLQDLYR	1		N-Term(iTRAQ4plex)	1.116	1.53	2.904	4.98	2	968.013	1935.02	2.62	55.86
											lINEHPGLLR	1		N-Term(iTRAQ4plex)	1.086	1.676	2.914	3.54	3	435.935	1305.79	12.05	33.81
											rPIIIDEk	1		N-Term(iTRAQ4plex); K8(iTRAQ4plex)	1.169	1.219	2.966	4.07	3	424.603	1271.8	1.96	26.38
											lQVGYNEDEIRR	1		N-Term(iTRAQ4plex)	0.818	0.903	2.124	2.95	2	818.433	1635.86	1.09	30.22
											mTEDGTDEIISTR	1		N-Term(iTRAQ4plex)	1.301	1.519	3.004	4.93	2	806.385	1611.76	-0.98	30.35
											nIFSEPLSIDEIk	1		N-Term(iTRAQ4plex); K13(iTRAQ4plex)	0.581	1.07	1.462	3.19	3	598.336	1792.99	0.66	51.79
O34683	hisB	Imidazoleglycerol-phosphate dehydratase OS	19.07	1	3	3	4	0.822	2.263	4.476			O34683
											aLDEATTIDPR	2		N-Term(iTRAQ4plex)	0.874	1.761	3.887	3.6	2	673.359	1345.71	1.38	28.6
											hGQFDLSINAk	1		N-Term(iTRAQ4plex); K11(iTRAQ4plex)	0.788	3.247	6.325	3.82	3	506.614	1517.83	-1.97	33.32
											vGTFDTELVHEFLWk	1		N-Term(iTRAQ4plex); K15(iTRAQ4plex)	0.903	2.833	4.997	5.77	3	703.717	2109.14	4.94	63.79
P94551	etfA	Electron transfer flavoprotein subunit alpha OS	10.77	1	2	2	3	1.18	1.805	3.51			P94551
											vIVAINkDPEADIFk	1		N-Term(iTRAQ4plex); K7(iTRAQ4plex); K15(iTRAQ4plex)	1.458	3.023	4.667	4.3	3	702.086	2104.24	2.47	46.56
											gVIEQENPDSVIFGHTAMGk	2		N-Term(iTRAQ4plex); K20(iTRAQ4plex)	1.344	1.762	3.866	9.6	3	806.42	2417.24	2.77	44.51
P46320	licH	Probable 6-phospho-beta-glucosidase OS	42.08	1	17	17	52	1.15	6.687	11.481			P46320
											aLkDADFVTTQFR	3		N-Term(iTRAQ4plex); K3(iTRAQ4plex)	0.888	2.441	5.205	4	3	600.668	1799.99	-0.57	40.14
											lNIVGTLAk	3		N-Term(iTRAQ4plex); K9(iTRAQ4plex)	1.007	5.281	8.746	3.76	2	608.897	1216.79	-0.48	41.11
											tIPVILEIAk	3		N-Term(iTRAQ4plex); K10(iTRAQ4plex)	1.066	6.926	9.603	3.73	2	692.957	1384.91	3.15	53.26
											dADFVTTQFR	2		N-Term(iTRAQ4plex)	0.93	5.153	8.068	3.9	2	672.34	1343.67	1.41	34.76
											aYLPQFFNk	6		N-Term(iTRAQ4plex); K9(iTRAQ4plex)	1.372	12.222	31.542	3.58	2	708.399	1415.79	-0.89	47.42
											eLWLVDIPEGEEk	4		N-Term(iTRAQ4plex); K13(iTRAQ4plex)	1.177	18.178	34.196	4.67	2	923.002	1845	4.15	50.96
											gLVQQIk	2		N-Term(iTRAQ4plex); K7(iTRAQ4plex)	1.093	3.292	7.824	3.12	2	537.352	1073.7	3.47	25.66
											rYDELPVR	3		N-Term(iTRAQ4plex)	0.954	2.543	4.906	4	3	397.892	1191.66	1.67	27.16
											eLFELYkDPNLAIkPPQLEk	3		N-Term(iTRAQ4plex); K7(iTRAQ4plex); K14(iTRAQ4plex); K20(iTRAQ4plex)		2.039	3.184	5.63	3	987.913	2961.73	3.66	52
											tGPkPIAVGDLPVSVR	4		N-Term(iTRAQ4plex); K4(iTRAQ4plex)	0.836	9.978	13.563	6.2	3	632.051	1894.14	1.46	38.53
											qILDEMLEAHk	2		N-Term(iTRAQ4plex); K11(iTRAQ4plex)	1.482	14.163	24.975	5.18	3	538.965	1614.88	2.21	44.24
											aGVPIDIHLTLDRR	2		N-Term(iTRAQ4plex)				4.31	4	430.756	1720	0.91	40.96
											vGLLQAR	2		N-Term(iTRAQ4plex)	1.167	15.992	28.789	2.65	2	450.791	900.574	-0.61	29.55
											iVTIGGGSSYTPELVEGFIk	3		N-Term(iTRAQ4plex); K20(iTRAQ4plex)				6.86	3	785.777	2355.32	4.57	60.85
											nISGAEWEPDFLk	1		N-Term(iTRAQ4plex); K13(iTRAQ4plex)	1.141	2.312	2.51	3.62	2	897.472	1793.94	3.49	51.6
											eMLEHELEASQTEGTR	2		N-Term(iTRAQ4plex)	1.38	16.362	35.75	5.65	2	1002.48	2003.95	0.28	31.05
											aGVPIDIHLTLDR	7		N-Term(iTRAQ4plex)	1.004	3.38	5.701	4.62	3	521.973	1563.9	4.09	44.43
P25052	tenA	Thiaminase-2 OS	6.36	1	1	1	1	1.267	1.283	2.42			P25052
											yYVLQDSYYLTHFAk	1		N-Term(iTRAQ4plex); K15(iTRAQ4plex)	1.267	1.283	2.42	6.71	3	733.72	2199.15	3.96	55.23
P14949	trxA	Thioredoxin OS	63.46	1	6	6	53	0.829	1.863	3.855			P14949
											mIAPVLEELDQEMGDkLk	8		N-Term(iTRAQ4plex); K16(iTRAQ4plex); K18(iTRAQ4plex)	0.662	1.949	3.935	8.22	3	831.126	2491.36	5.43	63.28
											mIAPVLEELDQEMGDk	4		N-Term(iTRAQ4plex); K16(iTRAQ4plex)	0.755	1.919	3.361	5.66	2	1053.54	2106.08	5.64	62.94
											yGVmSIPTLLVLk	4		N-Term(iTRAQ4plex); M4(Oxidation); K13(iTRAQ4plex)	0.611	2.063	3.683	4.99	3	580.021	1738.05	2.85	57.8
											eALQELVNk	4		N-Term(iTRAQ4plex); K9(iTRAQ4plex)	0.901	2.016	3.682	4.78	2	666.392	1331.78	-0.87	35.41
											dGEVVETSVGFkPk	13		N-Term(iTRAQ4plex); K12(iTRAQ4plex); K14(iTRAQ4plex)	0.795	2.129	5.037	6.27	3	642.03	1924.08	0.73	30.59
											iDVDENQETAGk	6		N-Term(iTRAQ4plex); K12(iTRAQ4plex)	0.807	1.814	3.992	5.71	2	803.913	1606.82	1.53	24.44
											yGVMSIPTLLVLk	14		N-Term(iTRAQ4plex); K13(iTRAQ4plex)	0.674	1.966	4.464	5.2	3	574.691	1722.06	5.7	65.88
P17585	aadK	Aminoglycoside 6-adenylyltransferase OS	3.52	1	1	1	1	0.835	0.475	1.352			P17585
											qYWIkRPTAR	1		N-Term(iTRAQ4plex); K5(iTRAQ4plex)	0.835	0.475	1.352	2.12	2	803.987	1606.97	15.21	47.78
P37561	yabS	Uncharacterized protein YabS OS	8.98	1	1	1	4	0.925	0.566	1.362			P37561
											lSTGGITPTGPAIREATLQFEk	4		N-Term(iTRAQ4plex); K22(iTRAQ4plex)	1.235	0.685	1.302	3.39	4	644.602	2575.39	-18.38	52.66
O32213	cysI	Sulfite reductase [NADPH] hemoprotein beta-component OS	9.46	1	5	5	6	1.088	1.315	2.599			O32213
											hALGEIGFIGk	2		N-Term(iTRAQ4plex); K11(iTRAQ4plex)	0.864	1.411	3.28	4.2	3	477.288	1429.85	5.79	38.1
											aYHEIWLDEER	1		N-Term(iTRAQ4plex)	1.177	0.896	1.563	3.97	3	535.598	1604.78	-1.23	36.98
											eTFQMHGILk	1		N-Term(iTRAQ4plex); K10(iTRAQ4plex)	1.287	1.491	3.213	3.58	3	497.947	1491.83	1.34	36.69
											iSAGIPDDDNR	1		N-Term(iTRAQ4plex)	1.184	1.928	2.767	3.77	2	658.831	1316.65	-1.05	26.18
											aPDGSPSDVER	1		N-Term(iTRAQ4plex)	1.151	0.877	2.227	3.06	2	637.311	1273.61	-0.25	16.92
O05522	tatAy	Sec-independent protein translocase protein TatAy OS	28.07	1	2	2	3	0.935	1.49	3.088			O05522
											gLTSDEEEk	1		N-Term(iTRAQ4plex); K9(iTRAQ4plex)	1.013	1.699	2.954	3.09	2	648.332	1295.66	0.45	18.06
											kLPELGk	2		N-Term(iTRAQ4plex); K1(iTRAQ4plex); K7(iTRAQ4plex)	0.808	1.593	4.543	3.15	3	406.271	1216.8	0.33	26.01
O34377	yobM	Uncharacterized protein YobM OS	9.19	2	1	2	2	1.562	2.03	3.648			O34377
											sLLDEk	1		N-Term(iTRAQ4plex); K6(iTRAQ4plex)	1.333	1.54	2.266	2.72	2	496.797	992.587	0.68	25.18
											hQLTLPQDYQk	1		N-Term(iTRAQ4plex); K11(iTRAQ4plex)	1.562	2.03	3.648	3.48	3	553.643	1658.92	3.19	30.51
Q45577	ybeC	Probable amino acid-proton symporter YbeC OS	1.48	1	1	1	1	0.877	1.465	3.106			Q45577
											yMPSIFGk	1		N-Term(iTRAQ4plex); K8(iTRAQ4plex)	0.877	1.465	3.106	2.85	2	615.842	1230.68	-1.81	45.37
P42413	iolB	5-deoxy-glucuronate isomerase OS	11.07	1	2	2	3	0.933	1.402	2.987			P42413
											lVHEVTTSNSDLTYVEFk	1		N-Term(iTRAQ4plex); K18(iTRAQ4plex)	1.035	0.871	1.247	4.29	3	790.754	2370.25	1.38	45.39
											kPTDSVYISNDR	2		N-Term(iTRAQ4plex); K1(iTRAQ4plex)	0.885	1.659	3.902	5.09	3	561.636	1682.89	-0.96	22.78
P54575	ribC	Riboflavin biosynthesis protein RibC OS	20.89	1	4	4	6	1.304	1.131	1.218			P54575
											rPEQPSIEVNLFDFNQEVYGAAIk	1		N-Term(iTRAQ4plex); K24(iTRAQ4plex)				7.77	3	1018.21	3052.61	5.27	61.97
											gLTLAVMTFHPHPSHVLGR	3		N-Term(iTRAQ4plex)	1.81	2.224	1.652	6.03	4	554.309	2214.21	1.84	45.68
											sVMALGYFDGVHLGHQk	1		N-Term(iTRAQ4plex); K17(iTRAQ4plex)	1.101	1.078	0.908	6.65	4	537.538	2147.13	0.31	46.39
											yFSNLR	1		N-Term(iTRAQ4plex)	0.982	1.159	0.785	2.45	2	472.26	943.512	0.1	34.49
P02968	hag	Flagellin OS	57.89	2	14	14	59	0.3	0.787	2.318			P02968
											kLLDGTYk	4		N-Term(iTRAQ4plex); K1(iTRAQ4plex); K8(iTRAQ4plex)	0.272	0.682	2.692	4.04	3	457.286	1369.84	2.16	25.05
											eADGSIAALHSVNDLDVTk	2		N-Term(iTRAQ4plex); K19(iTRAQ4plex)	0.304	0.565	2.408	7.71	3	748.401	2243.19	4.97	37.82
											fADNAADTADIGFDAQLk	1		N-Term(iTRAQ4plex); K18(iTRAQ4plex)	0.263	0.927	2.218	7.03	2	1086.05	2171.09	0.68	43.51
											iRDVDMAk	4		N-Term(iTRAQ4plex); K8(iTRAQ4plex)	0.256	0.774	2.782	3.68	3	412.573	1235.7	0.96	24.4
											lEHTINNLSASGENLTAAESR	1		N-Term(iTRAQ4plex)	0.375	0.911	2.471	7.03	3	791.071	2371.2	-0.06	39.45
											eLVVQAGNTGTQDk	4		N-Term(iTRAQ4plex); K14(iTRAQ4plex)	0.27	0.704	2.549	5.49	2	874.475	1747.94	0.22	24.1
											eMSEFTk	2		N-Term(iTRAQ4plex); K7(iTRAQ4plex)	0.319	0.777	2.567	3.2	2	580.299	1159.59	-0.54	28.4
											gLEMASk	1		N-Term(iTRAQ4plex); K7(iTRAQ4plex)	0.359	0.674	2.978	3.18	2	512.292	1023.58	2.05	23.47
											lLDGTYk	5		N-Term(iTRAQ4plex); K7(iTRAQ4plex)	0.267	0.791	2.275	2.73	2	549.327	1097.65	2.08	29.57
											iNHNIAALNTLNR	8		N-Term(iTRAQ4plex)	0.436	0.933	3.93	4.74	3	536.644	1607.92	4.46	35.05
											vDTATPANQk	10		N-Term(iTRAQ4plex); K10(iTRAQ4plex)	0.291	0.962	2.463	4.09	2	666.873	1332.74	1.88	16.88
											aGDDAAGLAISEk	4		N-Term(iTRAQ4plex); K13(iTRAQ4plex)	0.291	0.785	3.04	5.99	2	753.407	1505.81	1.67	28.27
											nSQDGISLIQTAEGALTETHAILQR	5		N-Term(iTRAQ4plex)		0.702	1.817	10.46	3	937.497	2810.48	-0.43	71.35
											vVDEAINQVSSQR	8		N-Term(iTRAQ4plex)	0.343	0.719	1.621	5.36	2	794.926	1588.84	2.11	36.54
Q795U4	ytkL	UPF0173 metal-dependent hydrolase YtkL OS	81.94	1	10	10	35	1.168	1.757	3.329			Q795U4
											lIGELNHIDLAFLPIGDNFTMGPEDAk	2		N-Term(iTRAQ4plex); K27(iTRAQ4plex)	0.976	1.983	2.573	7.81	3	1076.9	3228.7	3.08	70.72
											lTQAFHGSAITDEENk	3		N-Term(iTRAQ4plex); K16(iTRAQ4plex)	0.923	1.17	2.941	5.86	3	683.688	2049.05	0.57	33.79
											gLNVHPMHIGGSR	5		N-Term(iTRAQ4plex)	1.058	1.618	4.373	5.7	4	380.458	1518.81	0.54	27.29
											aDVILLTHGHNDHVGDTEQIAk	2		N-Term(iTRAQ4plex); K22(iTRAQ4plex)	1.055	1.463	3.216	5.75	3	891.135	2671.39	-5.24	33.32
											dHHIIFDPFLTGNSLTDIkPEDVk	1		N-Term(iTRAQ4plex); K19(iTRAQ4plex); K24(iTRAQ4plex)	0.863	1.567	3.391	6.36	3	1061.91	3183.71	2.01	52.37
											lAAEWLR	5		N-Term(iTRAQ4plex)	1.195	1.803	3.415	2.87	2	501.797	1002.59	1.15	41.15
											qVVPVHYNTFPVIEQDPEAFADSLPGGVGk	2		N-Term(iTRAQ4plex); K30(iTRAQ4plex)	1.473	1.754	4.326	9.11	3	1166.95	3498.83	4.69	57.47
											tIFHAGDTALFSDMk	6		N-Term(iTRAQ4plex); K15(iTRAQ4plex)	1.22	1.874	3.643	5.96	3	648.006	1942	2.8	45.9
											vTYHGHSVITVETk	4		N-Term(iTRAQ4plex); K14(iTRAQ4plex)	1.168	2.644	4.659	6.22	3	620.348	1859.03	1.1	27.24
											tITYTGMPAGILLTVEDk	5		N-Term(iTRAQ4plex); K18(iTRAQ4plex)	1.239	2.194	3.253	5.95	2	1106.12	2211.22	2.76	60.54
P19466	mtrB	Transcription attenuation protein MtrB OS	74.67	1	5	5	20	0.984	1.056	2.146			P19466
											gEALIQTAYGEMk	3		N-Term(iTRAQ4plex); K13(iTRAQ4plex)	1.019	1.371	2.682	5.21	2	849.952	1698.9	-0.59	44.61
											lDkGEVIIAQFTEHTSAIk	6		N-Term(iTRAQ4plex); K3(iTRAQ4plex); K19(iTRAQ4plex)	1.218	1.703	2.587	8.39	3	844.822	2532.45	4.76	52.51
											vRGEALIQTAYGEMk	2		N-Term(iTRAQ4plex); K15(iTRAQ4plex)	1.239	1.165	1.14	4.5	3	652.025	1954.06	-2.79	43.92
											hSSDFVVIk	4		N-Term(iTRAQ4plex); K9(iTRAQ4plex)	1.138	0.663	3.993	3.6	3	440.59	1319.76	0.19	25.3
											aVEDGVNVIGLTR	5		N-Term(iTRAQ4plex)	0.921	1.124	2.014	5.14	2	743.921	1486.83	0.16	40.89
P37502	yybB	Uncharacterized protein YybB OS	12.27	1	2	2	3	1.103	1.136	2.222			P37502
											aILLTHGHSDHIGGASk	2		N-Term(iTRAQ4plex); K17(iTRAQ4plex)	1.27	1.214	3.207	6.12	3	668.04	2002.11	-0.68	24.4
											fDIPIFAHQk	1		N-Term(iTRAQ4plex); K10(iTRAQ4plex)	1.036	1.175	1.723	5.08	3	501.957	1503.86	-0.41	46.37
Q07867	ftsL	Cell division protein FtsL OS	8.55	1	1	1	1	0.723	1.406	3.083			Q07867
											sVADLSkPQR	1		N-Term(iTRAQ4plex); K7(iTRAQ4plex)	0.723	1.406	3.083	3.38	3	463.608	1388.81	-0.35	21.53
P50833	yppE	Uncharacterized protein YppE OS	19.51	1	2	2	3	1.329	1.217	2.266			P50833
											dNFLELVLQSYVHHIHk	2		N-Term(iTRAQ4plex); K17(iTRAQ4plex)	1.398	1.424	2.367	5.43	4	595.833	2380.31	3.81	64.99
											eQIEAVk	1		N-Term(iTRAQ4plex); K7(iTRAQ4plex)	1.113	1.155	1.461	3.41	2	552.828	1104.65	-2	19.42
P39120	citZ	Citrate synthase 2 OS	31.18	1	11	11	29	1.201	3.987	7.649			P39120
											vPGLVAAFSR	4		N-Term(iTRAQ4plex)	1.285	7.547	14.161	3.42	2	580.85	1160.69	1.98	49.29
											lTNLTGESk	3		N-Term(iTRAQ4plex); K9(iTRAQ4plex)	1.241	2.046	2.412	3.42	2	625.862	1250.72	-2.19	25.64
											aDYTGPDk	2		N-Term(iTRAQ4plex); K8(iTRAQ4plex)	1.141	4.186	8.426	3.04	2	577.8	1154.59	-0.11	17.43
											tAISLLGLLDSEADTMNPEANYR	2		N-Term(iTRAQ4plex)				4.19	3	880.112	2638.32	2.31	72.13
											gLEPVEPR	2		N-Term(iTRAQ4plex)	1.158	3.545	7.787	3.2	2	520.797	1040.59	0.37	22.01
											kGLEPVEPR	1		N-Term(iTRAQ4plex); K1(iTRAQ4plex)	1.27	2.42	4.171	4.35	3	438.266	1312.78	-0.26	22.06
											sYSLENVHPMAALR	4		N-Term(iTRAQ4plex)	1.641	6.244	11.465	6.44	3	577.973	1731.9	4.39	40.35
											eAAVPQEIIEHFk	5		N-Term(iTRAQ4plex); K13(iTRAQ4plex)	0.98	5.26	11.414	6.54	3	600.336	1798.99	-0.63	49.56
											rLTNLTGESk	1		N-Term(iTRAQ4plex); K10(iTRAQ4plex)	0.686	0.968	1.27	3.33	3	469.612	1406.82	0.81	22.28
											mLTEIGEVENAEPYIR	1		N-Term(iTRAQ4plex)	1.473	6.408	8.804	5.51	2	1004.52	2008.02	2.75	50.77
											gPLHGGANEGVMk	4		N-Term(iTRAQ4plex); K13(iTRAQ4plex)	1.118	3.874	10.469	6.08	3	518.948	1554.83	0.14	22.85
P39583	ywaC	GTP pyrophosphokinase YwaC OS	10	1	1	1	1						P39583
											fSIISQEYNLIHGHNPIEHTk	1		N-Term(iTRAQ4plex); K21(iTRAQ4plex)				5.2	5	553.9	2765.47	3.93	48.69
P23445	fliI	Flagellum-specific ATP synthase OS	2.74	1	1	1	1	0.793	0.941	2.246			P23445
											gYTPSVFAILPR	1		N-Term(iTRAQ4plex)	0.793	0.941	2.246	4.05	2	732.92	1464.83	0.09	56.28
P39624	spsD	Spore coat polysaccharide biosynthesis protein SpsD OS	4.84	1	1	1	1	0.97	0.426	1.127			P39624
											hNGEVIGYLQGLSR	1		N-Term(iTRAQ4plex)	0.97	0.426	1.127	3.02	4	422.476	1686.88	-13.75	19.01
O05505	gmuB	Oligo-beta-mannoside-specific phosphotransferase enzyme IIB component OS	14.56	1	1	1	2	0.993	1.325	2.616			O05505
											kADAVLIGPQMSFLk	2		N-Term(iTRAQ4plex); K1(iTRAQ4plex); K15(iTRAQ4plex)	1.061	1.22	2.574	6.58	3	684.076	2050.21	2.15	48.24
O32210	yvgN	Glyoxal reductase OS	55.43	1	12	12	49	1.276	1.59	2.633			O32210
											sVAQVILR	4		N-Term(iTRAQ4plex)	1.123	1.489	2.354	3.21	2	515.331	1029.65	0.24	35.96
											sIDTAAIYkNEEGVGIGIk	3		N-Term(iTRAQ4plex); K9(iTRAQ4plex); K19(iTRAQ4plex)	1.493	1.932	3.551	5.9	3	804.124	2410.36	1.25	42.95
											lQLDYLDLYLIHWPGkDk	4		N-Term(iTRAQ4plex); K16(iTRAQ4plex); K18(iTRAQ4plex)		1.618	3.973	5.94	4	666.379	2662.5	-0.35	63.28
											eELFITSk	3		N-Term(iTRAQ4plex); K8(iTRAQ4plex)	1.565	1.824	3.166	3.69	2	627.863	1254.72	-0.18	35.08
											nEEGVGIGIk	5		N-Term(iTRAQ4plex); K10(iTRAQ4plex)	1.164	1.741	2.148	4.44	2	652.376	1303.75	-0.67	27.77
											aIGVSNFQVHHLEELLk	4		N-Term(iTRAQ4plex); K17(iTRAQ4plex)	1.686	2.027	4.182	7.25	3	741.424	2222.26	1.98	51.23
											iDALNkDER	1		N-Term(iTRAQ4plex); K6(iTRAQ4plex)	1.38	1.828	1.915	3.33	2	681.386	1361.76	1.07	22.07
											wDLQHGVVTIPk	6		N-Term(iTRAQ4plex); K12(iTRAQ4plex)	1.512	1.929	3.989	5.6	3	560.998	1680.98	6.81	41.98
											gQGIQLEAWSPLMQGQLLDNEVLTQIAEk	4		N-Term(iTRAQ4plex); K29(iTRAQ4plex)	2.466	1.547	3.857	8.28	3	1166.63	3497.89	8.78	75.35
											vWNEDQGYETTLAAFEk	3		N-Term(iTRAQ4plex); K17(iTRAQ4plex)	1.121	1.761	2.342	6.15	2	1145.07	2289.14	4.44	50.27
											dAEIkPMVNQVEFHPR	2		N-Term(iTRAQ4plex); K5(iTRAQ4plex)	0.99	1.378	2.449	6.58	3	733.391	2198.16	-1.47	33.7
											sIDTAAIYk	10		N-Term(iTRAQ4plex); K9(iTRAQ4plex)	1.494	1.959	3.314	4.39	2	635.367	1269.73	-1.92	29.29
P40768	ytkA	Uncharacterized protein YtkA OS	14.48	1	1	1	1		1.273	3.393			P40768
											vQVGDADAASNQSEEEHSHHH	1		N-Term(iTRAQ4plex)		1.273	3.393	6.35	4	607.774	2428.07	4.14	18.19
O34764	sat	Sulfate adenylyltransferase OS	11.52	2	3	3	3	1.045	0.725	1.519			O34764
											nPVHRAHEYIQk	1		N-Term(iTRAQ4plex); K12(iTRAQ4plex)	1.105	0.777	2.416	2.87	3	593.99	1779.96	-16.8	27.06
											tALETVDGLFLNPLVGETk	1		N-Term(iTRAQ4plex); K19(iTRAQ4plex)	0.825	0.811	0.938	5.38	3	769.105	2305.3	5.23	65.62
											gNTYVGGPITLIk	1		N-Term(iTRAQ4plex); K13(iTRAQ4plex)	1.135	0.656	1.533	5.26	2	810.98	1620.95	-1.89	43.99
O34308	ytkK	Putative oxidoreductase YtkK OS	9.8	1	2	2	3	1.214	1.551	2.969			O34308
											iITYGFQGAAHAPGWLHR	2		N-Term(iTRAQ4plex)	1.584	1.15	1.798	4.64	3	713.721	2139.15	5.75	47.43
											aVIPIMR	1		N-Term(iTRAQ4plex)	1.181	1.644	4.244	2.35	2	472.298	943.589	0.8	37.07
P54551	yqjN	Uncharacterized protein YqjN OS	3.84	1	1	1	1	1.938	2.338	3.521			P54551
											eAYSVQTPHTAVTLFNVLSMk	1		N-Term(iTRAQ4plex); K21(iTRAQ4plex)	1.938	2.338	3.521	4.03	3	875.473	2624.41	2.04	59.13
P37887	cysK	Cysteine synthase OS	72.73	1	13	13	55	1.106	1.578	2.633			P37887
											eAYPSIk	7		N-Term(iTRAQ4plex); K7(iTRAQ4plex)	1.115	1.241	2.497	3.05	2	548.319	1095.63	0.88	26.26
											vANSITELIGNTPIVk	5		N-Term(iTRAQ4plex); K16(iTRAQ4plex)	0.942	1.557	1.521	5.19	3	653.058	1957.16	0.9	56.96
											iYAVEPSDSPVLSGGkPGPHk	5		N-Term(iTRAQ4plex); K16(iTRAQ4plex); K21(iTRAQ4plex)	0.996	1.367	2.6	7.51	4	642.611	2567.42	1.2	34.51
											eIVEQFGDDQLDAFVAGIGTGGTITGAGEVLk	1		N-Term(iTRAQ4plex); K32(iTRAQ4plex)				7.53	3	1165.95	3495.84	8.21	69.09
											hGYFVPQQFNNPSNPEIHR	5		N-Term(iTRAQ4plex)	1.068	1.906	3.156	7.77	3	809.071	2425.2	2.77	35.56
											aYGAELVLTPGAEGMk	5		N-Term(iTRAQ4plex); K16(iTRAQ4plex)	0.971	1.79	3.349	5.43	2	948.014	1895.02	0.83	44.25
											iQGIGAGFVPDILNTEVYDEIFPVkNEEAFEYAR	2		N-Term(iTRAQ4plex); K25(iTRAQ4plex)				4.45	4	1033.79	4132.14	5.9	75.1
											kAEELAEk	3		N-Term(iTRAQ4plex); K1(iTRAQ4plex); K8(iTRAQ4plex)	1.369	1.715	3.456	3.92	3	450.605	1349.8	-0.31	20.53
											lADENSADVYLk	1		N-Term(iTRAQ4plex); K12(iTRAQ4plex)	1.036	1.651	2.869	5.87	2	813.434	1625.86	-0.63	33.05
											aILVMPDTMSMER	3		N-Term(iTRAQ4plex)	0.931	1.279	2.695	4.22	2	819.414	1637.82	1.52	48.34
											lEYMNPGSSVk	6		N-Term(iTRAQ4plex); K11(iTRAQ4plex)	1.05	1.98	3.514	3.89	2	756.903	1512.8	0.79	32.64
											aGNTIIEPTSGNTGIGLAMVAAAk	10		N-Term(iTRAQ4plex); K24(iTRAQ4plex)	0.933	1.717	3.241	8.13	3	849.136	2545.39	1.95	51.43
											iGLAMIEAAEk	2		N-Term(iTRAQ4plex); K11(iTRAQ4plex)	1.004	2.032	2.868	5.2	2	717.417	1433.83	-0.42	49.55
P37967	pnbA	Para-nitrobenzyl esterase OS	14.11	1	4	4	7	1.37	1.041	2.004			P37967
											tGNPSTEAVNWPAYHEETR	1		N-Term(iTRAQ4plex)	1.009	0.763	1.067	6.58	3	768.366	2303.08	0.55	34.13
											aFHALELPFVFGNLDGLER	1		N-Term(iTRAQ4plex)		0.71	1.481	5.51	3	763.742	2289.21	-1.35	70.91
											gIPYAkPPVGQWR	4		N-Term(iTRAQ4plex); K6(iTRAQ4plex)	1.619	1.069	2.894	4.12	3	586.341	1757.01	-0.64	38.09
											aIAEGAASGIPLLIGTTR	1		N-Term(iTRAQ4plex)	1.267	0.876	1.064	3.41	2	928.045	1855.08	2.59	53.62
P37475	spoIIE	Stage II sporulation protein E OS	2.42	1	1	1	4	1.049	1.153	2.219			P37475
											iDHNTPkWASIPVPAIFQNk	4		N-Term(iTRAQ4plex); K7(iTRAQ4plex); K20(iTRAQ4plex)	1.035	1.218	1.855	3.74	4	677.877	2708.49	-13.74	64.2
O05220	ywrF	Uncharacterized protein YwrF OS	6.34	1	1	1	1	1.133	1.174	2.186			O05220
											gYILTDELkPASR	1		N-Term(iTRAQ4plex); K9(iTRAQ4plex)	1.133	1.174	2.186	4.25	3	584.337	1751	1.03	37.08
P70994	ywhB	2-hydroxymuconate tautomerase OS	14.52	1	1	1	3	1.099	1.514	2.648			P70994
											iVVFIEEMR	3		N-Term(iTRAQ4plex)	1.119	1.539	2.759	3.99	2	640.365	1279.72	1.54	58.43
P94424	nfrA2	FMN reductase [NAD(P)H] OS	23.69	1	5	5	12	1.409	2.698	4.416			P94424
											lYYPHIR	2		N-Term(iTRAQ4plex)	1.332	2.565	3.885	3.22	3	369.215	1105.63	3.25	33.73
											gNPQELIELLELPk	2		N-Term(iTRAQ4plex); K14(iTRAQ4plex)	1.276	1.781	2.876	5.09	3	627.703	1881.1	0.94	66.92
											yVFPLSGLVIGHPADR	4		N-Term(iTRAQ4plex)	1.36	2.358	4.054	7.25	3	629.023	1885.05	4.67	56.8
											iALEDLHDFk	2		N-Term(iTRAQ4plex); K10(iTRAQ4plex)	1.631	3.018	5.754	4.52	3	496.948	1488.83	0.05	43.36
											nWSQSIASYYER	2		N-Term(iTRAQ4plex)	1.136	1.863	2.466	4.31	2	824.402	1647.8	4.67	45.41
O31785	pksS	Polyketide biosynthesis cytochrome P450 PksS OS	8.64	2	3	3	4	1.236	2.247	3.786			O31785
											yTSPVVMMANR	1		N-Term(iTRAQ4plex)	1.152	2.404	3.374	3.42	2	706.863	1412.72	2.46	39.56
											eFHHNPFSVLGR	1		N-Term(iTRAQ4plex)	1.049	1.597	3.727	3.82	3	528.612	1583.82	0.81	36.28
											fGATYPAWLITR	2		N-Term(iTRAQ4plex)	1.5	2.629	4.088	3.46	2	770.426	1539.85	0.7	55.29
P46338	pstS	Phosphate-binding protein PstS OS	18	1	3	3	6	0.717	0.797	2.046			P46338
											aLVDHQVAVVGMAAAVNPDAGVk	4		N-Term(iTRAQ4plex); K23(iTRAQ4plex)	0.872	0.838	1.65	7.97	3	840.801	2520.39	1.78	44.08
											iTLVNRPDSSGTR	1		N-Term(iTRAQ4plex)	0.607	0.851	2.334	3.14	3	520.625	1559.86	-0.57	25.89
											nVATGEYPIWAYQHSYTk	1		N-Term(iTRAQ4plex); K18(iTRAQ4plex)	0.493	0.697	1.564	7.24	3	806.078	2416.22	1.22	43.29
P54333	xkdN	Phage-like element PBSX protein XkdN OS	16.22	1	2	2	2	1.034	1.024	1.873			P54333
											gNVIPFILkPITTER	1		N-Term(iTRAQ4plex); K9(iTRAQ4plex)	1.022	0.763	1.654	3.67	3	662.738	1986.2	0.8	54.25
											tADPVEVAk	1		N-Term(iTRAQ4plex); K9(iTRAQ4plex)	1.046	1.285	2.091	3	2	609.353	1217.7	-0.08	21.43
P19669	tal	Transaldolase OS	86.32	1	19	19	121	1.079	1.519	2.801			P19669
											hPLTDkGIEQFLADWNk	6		N-Term(iTRAQ4plex); K6(iTRAQ4plex); K17(iTRAQ4plex)				4.51	4	611.837	2444.32	-2.16	54.73
											qIFDIHGLDTQIIAASIR	31		N-Term(iTRAQ4plex)	0.983	1.578	2.782	7.21	3	719.073	2155.21	2.92	58.68
											tNVTLIFNANQALLAAR	4		N-Term(iTRAQ4plex)	1.3	2.69	3.691	4.88	2	987.567	1974.13	0.96	56.99
											gAHIGTMPLk	7		N-Term(iTRAQ4plex); K10(iTRAQ4plex)	1.063	1.28	3.791	4.22	3	438.261	1312.77	2.32	26.29
											vIHALTk	1		N-Term(iTRAQ4plex); K7(iTRAQ4plex)	1.017	1.386	2.292	2.53	2	535.351	1069.69	-2.18	23.59
											gSVSAEVISLkAEEMIEEGk	1		N-Term(iTRAQ4plex); K11(iTRAQ4plex); K20(iTRAQ4plex)	1.081	1.505	4.152	7.45	3	846.799	2538.38	5.43	56.75
											aEEMIEEGkELAk	2		N-Term(iTRAQ4plex); K9(iTRAQ4plex); K13(iTRAQ4plex)	1.049	1.818	4.22	4.69	4	478.013	1909.03	-0.73	40.46
											aGATYVSPFLGR	14		N-Term(iTRAQ4plex)	1.15	1.771	3.982	4.8	2	691.882	1382.76	0.81	41.82
											mLFFVDTANIDEIR	8		N-Term(iTRAQ4plex)	1.253	2.118	2.726	5.55	3	609.988	1827.95	2.66	60.4
											gIEQFLADWNk	5		N-Term(iTRAQ4plex); K11(iTRAQ4plex)	1.215	1.601	3.574	5.62	2	804.937	1608.87	2.89	60.71
											eANVSFHDR	4		N-Term(iTRAQ4plex)	1.103	1.049	2.483	4.31	3	406.871	1218.6	0.72	19.19
											aEEMIEEGk	3		N-Term(iTRAQ4plex); K9(iTRAQ4plex)	1.133	1.752	3.196	3.97	2	662.338	1323.67	-0.95	28.13
											eITDVVk	2		N-Term(iTRAQ4plex); K7(iTRAQ4plex)	1.18	1.597	3.549	2.99	2	546.331	1091.66	0.34	26.07
											iPMTSDGLkAVR	1		N-Term(iTRAQ4plex); K9(iTRAQ4plex)	0.95	1.255	1.819	3.77	3	525.977	1575.92	1.38	33.07
											gSVSAEVISLk	10		N-Term(iTRAQ4plex); K11(iTRAQ4plex)	1.028	1.41	3.509	5.49	2	689.412	1377.82	-2.26	36.7
											iPMTSDGLk	7		N-Term(iTRAQ4plex); K9(iTRAQ4plex)	1.009	1.587	3.082	2.82	2	625.357	1249.71	0.09	34.37
											iAPNITVk	7		N-Term(iTRAQ4plex); K8(iTRAQ4plex)	1.029	1.852	3.273	2.99	2	572.372	1143.74	2.83	31.51
											eANELGILAGVTTNPSLVAk	4		N-Term(iTRAQ4plex); K20(iTRAQ4plex)	0.911	1.082	1.415	7.19	3	762.44	2285.31	4.16	54.38
											aLTDLGIk	4		N-Term(iTRAQ4plex); K8(iTRAQ4plex)	0.962	1.291	2.913	3.68	2	559.856	1118.7	1.37	34.44
O31776	tdh	L-threonine 3-dehydrogenase OS	2.88	1	1	1	2	0.979	2.762	5.044			O31776
											gLTIQGITGR	2		N-Term(iTRAQ4plex)	1.111	4.071	7.064	3.31	2	580.35	1159.69	0.52	39.47
P54946	yxeG	Uncharacterized protein YxeG OS	5.95	1	1	1	1	0.906	0.719	1.657			P54946
											rkPSLPVEYQk	1		N-Term(iTRAQ4plex); K2(iTRAQ4plex); K11(iTRAQ4plex)	0.906	0.719	1.657	3.17	3	593.028	1777.07	-0.3	26.23
O32197	liaR	Transcriptional regulatory protein LiaR OS	11.85	1	2	2	2	1.553	1.383	2.213			O32197
											vLLIDDHEMVR	1		N-Term(iTRAQ4plex)	2.018	1.898	3.327	5.11	3	495.274	1483.81	0.28	39
											tNkEIGEELFITIk	1		N-Term(iTRAQ4plex); K3(iTRAQ4plex); K14(iTRAQ4plex)	1.088	0.868	1.099	3.6	3	689.739	2067.2	-2.34	49.32
P42405	hxlA	3-hexulose-6-phosphate synthase OS	38.57	1	7	7	35	0.618	1.449	2.92			P42405
											eVEQYIDVVEIGTPVVINEGLR	3		N-Term(iTRAQ4plex)	0.339	1.406	3.424	6.06	2	1308.21	2615.42	4.33	62.98
											kILVDMINVk	4		N-Term(iTRAQ4plex); K1(iTRAQ4plex); K10(iTRAQ4plex)	0.64	1.597	4.704	5.44	3	535.677	1605.02	1.33	43.1
											eAFPQLk	7		N-Term(iTRAQ4plex); K7(iTRAQ4plex)	0.464	1.399	3.369	3.06	2	560.833	1120.66	-2.22	30.77
											iMDAGGYEIMk	1		N-Term(iTRAQ4plex); K11(iTRAQ4plex)	0.366	1.633	3.098	5.1	2	758.394	1515.78	0.54	41.23
											nSFEELTTIk	3		N-Term(iTRAQ4plex); K10(iTRAQ4plex)	0.579	1.483	1.981	4.55	2	735.408	1469.81	0.33	42
											aSEAGADIITVLGATDDATIk	7		N-Term(iTRAQ4plex); K21(iTRAQ4plex)	0.212	1.078	2.3	5.59	3	774.088	2320.25	0.89	52.7
											iLVDMINVk	10		N-Term(iTRAQ4plex); K9(iTRAQ4plex)	0.618	1.839	3.462	4.15	2	666.912	1332.82	0.43	50.26
P55179	pepT	Peptidase T OS	32.44	1	11	11	20	1.192	1.185	2.019			P55179
											aVNVIVEIAk	2		N-Term(iTRAQ4plex); K10(iTRAQ4plex)	1.116	0.642	0.945	3.21	2	672.43	1343.85	2.57	44.46
											iEPVIEIVNIAk	2		N-Term(iTRAQ4plex); K12(iTRAQ4plex)	1.045	0.866	1.296	4.24	3	542.675	1626.01	2.22	57.37
											aVEELQNEYGQDR	3		N-Term(iTRAQ4plex)	1.304	1.443	2.689	5.17	2	847.909	1694.81	0.48	30.63
											ekIEPVIEIVNIAk	2		N-Term(iTRAQ4plex); K2(iTRAQ4plex); K14(iTRAQ4plex)	1.142	1.426	2.864	5.46	2	1014.13	2027.25	2.48	50.51
											vAFTPDEEIGR	2		N-Term(iTRAQ4plex)	1.105	1.22	1.929	4	2	689.36	1377.71	-0.84	33.57
											gHTLITTDGTTLLGADNk	3		N-Term(iTRAQ4plex); K18(iTRAQ4plex)	1.205	1.682	3.438	5.86	2	1058.58	2116.14	-2.04	37.18
											iLLDMNDQYYNMR	1		N-Term(iTRAQ4plex)	1.16	1.291	2.302	5.35	2	916.946	1832.88	2.99	47.69
											qAMENLGIEPk	2		N-Term(iTRAQ4plex); K11(iTRAQ4plex)	0.999	1.18	1.661	4.45	2	759.416	1517.82	0.25	32.98
											mkEEIIER	1		N-Term(iTRAQ4plex); K2(iTRAQ4plex)	1.01	1.215	2.133	3.03	2	668.383	1335.76	2.79	25.42
											aGIAEIMTAMDYLIk	1		N-Term(iTRAQ4plex); K15(iTRAQ4plex)	0.665	0.832	1.511	3.32	3	643.355	1928.05	0.78	79.93
											dVPTIGFLAHVDTATDFTGk	1		N-Term(iTRAQ4plex); K20(iTRAQ4plex)	1.487	1.536	2.19	7.72	3	798.426	2393.26	1.58	55.72
O34374	yjiB	Putative cytochrome P450 YjiB OS	3.79	1	1	1	1	1.413	1.142	1.785			O34374
											sHPELMPQAVEEALR	1		N-Term(iTRAQ4plex)	1.413	1.142	1.785	5.25	3	617.657	1850.96	0.46	46.48
P54375	sodA	Superoxide dismutase [Mn] OS	67.82	1	9	9	108	1.112	1.594	2.689			P54375
											hHNTYVTNLNk	2		N-Term(iTRAQ4plex); K11(iTRAQ4plex)	0.769	0.872	1.069	4.86	3	543.63	1628.88	1.24	19.42
											lEITSTPNQDSPLSEGk	4		N-Term(iTRAQ4plex); K17(iTRAQ4plex)	0.964	1.531	2.056	6.28	3	702.038	2104.1	-0.22	38.32
											mAYELPELPYAYDALEPHIDkETMTIHHTk	1		N-Term(iTRAQ4plex); K21(iTRAQ4plex); K30(iTRAQ4plex)	1.463	0.605	0.58	5.68	3	1330.35	3989.04	5.2	54.79
											rPDYISAFWNVVNWDEVAR	5		N-Term(iTRAQ4plex)		1.23	1.016	6.65	3	827.753	2481.24	0.1	72.76
											aVEGNTALANk	35		N-Term(iTRAQ4plex); K11(iTRAQ4plex)	1.25	2.043	4.238	5.68	2	688.394	1375.78	1.66	21.25
											sVEELVADLDSVPENIR	11		N-Term(iTRAQ4plex)	1.12	1.817	3.525	5.88	2	1015.04	2029.07	6.07	63.09
											eQFAAAAAGR	8		N-Term(iTRAQ4plex)	0.832	1.381	1.533	4.02	2	568.304	1135.6	3.34	24.24
											tPILGLDVWEHAYYLNYQNR	36		N-Term(iTRAQ4plex)	1.233	1.313	3.082	8.34	3	870.451	2609.34	4.18	62.36
											fkEQFAAAAAGR	6		N-Term(iTRAQ4plex); K2(iTRAQ4plex)	1.239	1.679	1.915	5.3	3	518.959	1554.86	-0.72	32.25
O32230	smpB	SsrA-binding protein OS	16.67	1	2	2	2	1.158	0.861	1.537			O32230
											gEVFLHNMHVSPYEQGNR	1		N-Term(iTRAQ4plex)	1.218	0.819	1.441	6.17	3	753.371	2258.1	3.57	36.17
											gYSLVPLk	1		N-Term(iTRAQ4plex); K8(iTRAQ4plex)	1.098	0.903	1.634	3.34	2	582.865	1164.72	-1.17	37.82
O07529	azr	FMN-dependent NADPH-azoreductase OS	30.46	1	4	4	10	1.008	1.229	2.222			O07529
											gGINALNNMR	2		N-Term(iTRAQ4plex)	1.136	1.136	1.919	3.52	2	602.324	1203.64	1.89	31.56
											aDAIVLLSPEYHSGMSGALk	4		N-Term(iTRAQ4plex); K20(iTRAQ4plex)	0.933	1.438	2.442	5.93	3	783.094	2347.27	4.18	48.13
											gVYANVIPk	2		N-Term(iTRAQ4plex); K9(iTRAQ4plex)	1.101	1.36	3.273	3.39	2	624.884	1248.76	3.88	32.65
											ykPVALLAVAGGGk	2		N-Term(iTRAQ4plex); K2(iTRAQ4plex); K14(iTRAQ4plex)	1.168	1.77	2.545	5.47	3	592.711	1776.12	4.5	43.91
Q59192	parE	DNA topoisomerase 4 subunit B OS	12.52	1	6	6	11	1.235	0.901	0.768			Q59192
											lGkPTPEVILTVLHAGGk	3		N-Term(iTRAQ4plex); K3(iTRAQ4plex); K18(iTRAQ4plex)	1.282	0.851	0.889	7.47	3	754.803	2262.4	2.13	53.04
											vFIALPPLYk	1		N-Term(iTRAQ4plex); K10(iTRAQ4plex)	1.313	0.997	0.851	2.84	2	724.963	1448.92	4.51	56.74
											fQAVLPLR	3		N-Term(iTRAQ4plex)	1.2	0.875	0.697	2.88	2	544.343	1087.68	3.49	44.98
											kQQFDYNEDAIQVLEGLEAVR	1		N-Term(iTRAQ4plex); K1(iTRAQ4plex)				3.3	3	918.483	2753.43	-0.07	65.29
											kRPGMYIGSTDAR	2		N-Term(iTRAQ4plex); K1(iTRAQ4plex)	0.997	0.826	0.557	3.45	4	435.742	1739.95	-0.84	22.35
											iHkDNSISVQDR	1		N-Term(iTRAQ4plex); K3(iTRAQ4plex)	1.155	0.775	0.583	3.04	3	567.316	1699.93	-0.31	20.14
P39062	acsA	Acetyl-coenzyme A synthetase OS	17.48	1	8	8	10	0.999	4.174	6.65			P39062
											vFIFMPR	2		N-Term(iTRAQ4plex)	1.13	4.345	6.963	2.46	2	527.306	1053.6	0.87	52.98
											vVVTTPELLER	1		N-Term(iTRAQ4plex)	0.968	2.067	2.904	3.47	2	700.419	1399.83	1.69	41.64
											aLPAIEGDHNLk	1		N-Term(iTRAQ4plex); K12(iTRAQ4plex)	0.901	2.183	4.472	6.01	3	522.634	1565.89	-1.76	29.67
											lDIEWMDkk	1		N-Term(iTRAQ4plex); K8(iTRAQ4plex); K9(iTRAQ4plex)	1.327	7.381	13.953	3.34	3	537.305	1609.9	0.9	41.87
											gVLHVHEAMIQQYQTGk	1		N-Term(iTRAQ4plex); K17(iTRAQ4plex)	0.922	1.117	1.857	6.92	3	743.07	2227.19	1.96	33.09
											lNAAYEAIDR	1		N-Term(iTRAQ4plex)	0.987	4.284	5.408	3.99	2	640.342	1279.68	-0.01	35.05
											iGAIAGPLFEAFMEGAVk	1		N-Term(iTRAQ4plex); K18(iTRAQ4plex)	0.953	5.979	6.505	5.56	3	703.73	2109.18	4.56	79.69
											dGFLLHYTSGSTGTPk	2		N-Term(iTRAQ4plex); K16(iTRAQ4plex)	0.946	2.394	5.18	4.96	3	657.016	1969.03	2.63	38
P23448	fliG	Flagellar motor switch protein FliG OS	10.06	1	3	3	4	0.895	1.004	1.927			P23448
											aLGEDkAENILNR	1		N-Term(iTRAQ4plex); K6(iTRAQ4plex)	1.077	1.083	2.674	3.57	3	577.66	1730.97	0.69	33.77
											hLTDEEIER	1		N-Term(iTRAQ4plex)	0.785	0.962	2.015	4.19	3	429.221	1285.65	-0.73	18.9
											kLEEAGEIVIAR	2		N-Term(iTRAQ4plex); K1(iTRAQ4plex)	1.134	1.296	1.578	5.83	3	539.326	1615.96	0.87	35.95
P96501	flgL	Flagellar hook-associated protein 3 OS	3.36	1	1	1	1	0.814	0.883	1.736			P96501
											lSAQEETATk	1		N-Term(iTRAQ4plex); K10(iTRAQ4plex)	0.814	0.883	1.736	4.28	2	683.378	1365.75	1.32	18.45
O06972	yvcI	Uncharacterized Nudix hydrolase YvcI OS	44.3	1	6	6	9	1.15	0.853	1.028			O06972
											gQGLLHGTFTYTPEFELLSYR	4		N-Term(iTRAQ4plex)	1.219	0.667	1.202	6.35	3	858.445	2573.32	2.2	60.69
											vLLLQkPR	1		N-Term(iTRAQ4plex); K6(iTRAQ4plex)	1.056	0.943	0.847	3.12	3	418.954	1254.85	-1.82	33.18
											lDPQHIk	1		N-Term(iTRAQ4plex); K7(iTRAQ4plex)	1.194	1.08	1.057	3.22	3	380.232	1138.68	-0.59	22.93
											gVFTFIIk	1		N-Term(iTRAQ4plex); K8(iTRAQ4plex)	1.311	0.931	1.216	3.56	2	606.882	1212.76	-1.54	51.5
											rGWWVAPGGk	1		N-Term(iTRAQ4plex); K10(iTRAQ4plex)	1.059	0.789	1.021	3.14	3	467.936	1401.79	-3.4	35.37
											eYREETGIYIINPQLk	1		N-Term(iTRAQ4plex); K16(iTRAQ4plex)	0.966	0.725	0.737	5.21	3	752.081	2254.23	-1.11	43.26
P51777	cspD	Cold shock protein CspD OS	89.39	1	5	5	121	0.919	1.223	2.248			P51777
											gPQASNVVkL	12		N-Term(iTRAQ4plex); K9(iTRAQ4plex)	1.038	1.252	2.865	4.14	2	650.895	1300.78	0.57	29.02
											gFGFIEVEGGDDVFVHFTAIEGDGYk	20		N-Term(iTRAQ4plex); K26(iTRAQ4plex)	0.748	1.106	1.906	8.87	3	1031.85	3093.52	3.95	80.04
											sLEEGQEVSFEIVEGNR	77		N-Term(iTRAQ4plex)	0.887	1.185	1.864	6.93	2	1033.51	2066.02	1.17	44.13
											gPQASNVVk	11		N-Term(iTRAQ4plex); K9(iTRAQ4plex)	0.95	1.432	2.333	3.98	2	594.353	1187.7	0.8	17.31
											wFNNEk	1		N-Term(iTRAQ4plex); K6(iTRAQ4plex)	0.837	1.562	1.868	2.32	2	563.299	1125.59	-2.56	32.51
O31590	cspR	Putative tRNA (cytidine(34)-2'-O)-methyltransferase OS	25	1	4	4	5	1.258	0.814	0.678			O31590
											fFFITk	1		N-Term(iTRAQ4plex); K6(iTRAQ4plex)	1.08	0.818	0.488	2.39	2	545.832	1090.66	3.39	50.84
											gkFFFITk	1		N-Term(iTRAQ4plex); K2(iTRAQ4plex); K8(iTRAQ4plex)	1.113	0.786	0.696	3.66	3	473.961	1419.87	-2.44	43.19
											fGQQPHTSFDYTDLDEDYFFVFGR	1		N-Term(iTRAQ4plex)	1.767		0.815	3.38	4	769.607	3075.4	4.1	63.07
											lPMTEHVR	2		N-Term(iTRAQ4plex)	1.113	0.86	0.654	4.07	3	376.211	1126.62	2.52	24.68
O34564	ykuU	Thioredoxin-like protein YkuU OS	20	1	2	2	3	1.503	0.789	1.611			O34564
											yPLAADTNHEVSR	2		N-Term(iTRAQ4plex)	1.5	0.919	1.935	4.93	3	539.61	1616.82	0.28	25.4
											gLFIINPEGELQYQTVFHNNIGR	1		N-Term(iTRAQ4plex)		0.476	0.878	5.8	3	935.158	2803.46	-1.78	60.62
P39794	treP	PTS system trehalose-specific EIIBC component OS	9.36	1	5	5	8	1.169	0.972	1.633			P39794
											vDQEMLDQIDVVk	4		N-Term(iTRAQ4plex); K13(iTRAQ4plex)	1.167	1.081	1.301	4.89	2	910.489	1819.97	0.09	45.87
											nMNPLQR	1		N-Term(iTRAQ4plex)	1.262	0.933	2.12	3.18	2	508.775	1016.54	0.09	24.88
											vYAELVk	1		N-Term(iTRAQ4plex); K7(iTRAQ4plex)	1.009	0.679	1.093	2.9	2	555.344	1109.68	-0.27	31.6
											fALIDESk	1		N-Term(iTRAQ4plex); K8(iTRAQ4plex)	1.136	0.888	2.02	3.49	2	605.851	1210.69	2.11	36.89
											eTGIGESTk	1		N-Term(iTRAQ4plex); K9(iTRAQ4plex)	1.194	0.848	1.653	3.71	2	605.33	1209.65	-3.43	13.79
O07636	ylaL	Uncharacterized protein YlaL OS	26.09	1	3	3	6	0.903	1.439	2.588			O07636
											gNVTYPITIDPSVWIFDDRk	1		N-Term(iTRAQ4plex); K20(iTRAQ4plex)	0.772	1.619	2.985	7.28	3	875.473	2624.4	2.55	63.1
											kGDSQDTYLQSAGDESDLDPER	2		N-Term(iTRAQ4plex); K1(iTRAQ4plex)	1.113	0.744	0.714	6.03	4	679.322	2714.26	0.4	31.22
											gNVTYPITIDPSVWIFDDR	3		N-Term(iTRAQ4plex)	0.85	1.657	3.604	4.99	2	1176.61	2352.21	4.44	66.15
P38494	ypfD	30S ribosomal protein S1 homolog OS	67.8	1	28	28	140	1.274	1.727	2.642			P38494
											kQELLQSLEVGSVLDGk	1		N-Term(iTRAQ4plex); K1(iTRAQ4plex); K17(iTRAQ4plex)		0.589	1.248	2.9	4	569.586	2275.32	0.21	51.32
											aSDVVkVDDELDLk	3		N-Term(iTRAQ4plex); K6(iTRAQ4plex); K14(iTRAQ4plex)	1.276	1.907	3.408	5.73	2	989.558	1978.11	1.33	35.2
											tLSLLVVELDR	1		N-Term(iTRAQ4plex)	1.144	1.943	1.421	4.36	2	701.427	1401.85	2.28	60.92
											dTLPGPWNQIGEk	4		N-Term(iTRAQ4plex); K13(iTRAQ4plex)	1.467	1.873	2.36	5.56	3	581.65	1742.93	1.61	46.11
											vEDkHVDVEIINVk	5		N-Term(iTRAQ4plex); K4(iTRAQ4plex); K14(iTRAQ4plex)	1.269	1.648	2.936	6.2	3	690.404	2069.2	1.04	34.84
											eETSTGFQLGDLIGDk	6		N-Term(iTRAQ4plex); K16(iTRAQ4plex)	0.907	2.212	2.625	7.69	2	999.518	1998.03	1.33	48.27
											gGLVVDIGVR	27		N-Term(iTRAQ4plex)	1.257	1.509	3.161	4.02	2	564.846	1128.68	-1.47	38.97
											aVVESEQANk	4		N-Term(iTRAQ4plex); K10(iTRAQ4plex)	1.447	1.863	3.243	4.71	2	681.876	1362.75	-0.99	15.89
											iSLSMR	1		N-Term(iTRAQ4plex)	1.2	1.836	2.629	2.4	2	425.751	850.495	1.98	33.11
											eVFEAEVk	2		N-Term(iTRAQ4plex); K8(iTRAQ4plex)	1.377	2.087	3.218	3.96	2	619.847	1238.69	0.05	28.54
											hIGTPHEVLEEGQTVk	13		N-Term(iTRAQ4plex); K16(iTRAQ4plex)	1.297	1.569	2.603	6.1	3	688.043	2062.11	-1.46	28.16
											gFIPASLVEAHFVEDFTDYk	2		N-Term(iTRAQ4plex); K20(iTRAQ4plex)	1.51	1.838	3.081	7.39	3	858.444	2573.32	-0.1	70.82
											eLEETPk	2		N-Term(iTRAQ4plex); K7(iTRAQ4plex)	1.459	1.995	3.059	2.92	2	567.318	1133.63	-0.59	18.78
											eVFEAEVkDVVk	1		N-Term(iTRAQ4plex); K8(iTRAQ4plex); K12(iTRAQ4plex)	1.272	1.808	4.18	4.44	3	608.688	1824.05	1.11	41.02
											aWEDLEk	2		N-Term(iTRAQ4plex); K7(iTRAQ4plex)	1.429	1.975	3.524	3.41	2	589.818	1178.63	-0.86	31.06
											vLDVNENEER	2		N-Term(iTRAQ4plex)	1.181	1.851	2.338	3.8	2	680.846	1360.68	1.25	25.06
											tLSLLVVELDRDk	4		N-Term(iTRAQ4plex); K13(iTRAQ4plex)	1.364	2.558	1.916	5.78	3	597.03	1789.07	3.84	53.95
											vEDDALILSk	6		N-Term(iTRAQ4plex); K10(iTRAQ4plex)	1.352	1.903	2.54	4.39	2	695.904	1390.8	-1.19	39.78
											hVDVEIINVk	6		N-Term(iTRAQ4plex); K10(iTRAQ4plex)	1.428	1.783	2.597	4.36	2	727.435	1453.86	0.51	33.15
											vDDELDLk	3		N-Term(iTRAQ4plex); K8(iTRAQ4plex)	1.607	2.341	2.672	3.69	2	617.841	1234.68	-1	30.33
											mTEEMNQIDVQVPEVGDVVk	4		N-Term(iTRAQ4plex); K20(iTRAQ4plex)	0.881	1.426	1.683	7.07	3	850.102	2548.29	1.34	49.81
											qELLQSLEVGSVLDGk	1		N-Term(iTRAQ4plex); K16(iTRAQ4plex)	0.98	1.049	1.301	4.12	3	668.383	2003.13	4.03	53.62
											eETSTGFQLGDLIGDkLNk	2		N-Term(iTRAQ4plex); K16(iTRAQ4plex); K19(iTRAQ4plex)	1.432	2.241	3.821	6.41	4	625.096	2497.36	3.77	53.86
											vkPGDVLEGTVQR	14		N-Term(iTRAQ4plex); K2(iTRAQ4plex)	1.163	1.248	1.441	5.1	3	562.666	1685.98	2.39	31.24
											gFIPASLVEAHFVEDFTDYkGk	4		N-Term(iTRAQ4plex); K20(iTRAQ4plex); K22(iTRAQ4plex)	0.993	1.538	5	7.92	3	968.186	2902.54	3.07	61.76
											iSLSIkDTLPGPWNQIGEk	8		N-Term(iTRAQ4plex); K6(iTRAQ4plex); K19(iTRAQ4plex)	1.102	1.9	2.983	8.61	3	843.49	2528.45	3.64	55.99
											vTkVEDDALILSk	3		N-Term(iTRAQ4plex); K3(iTRAQ4plex); K13(iTRAQ4plex)	1.701	2.151	3.153	5.86	3	621.71	1863.12	0.04	39.15
											qSGIIPISELSSLHVEk	9		N-Term(iTRAQ4plex); K17(iTRAQ4plex)	1.446	2.065	2.953	8.01	3	709.075	2125.21	-0.82	49.52
O34944	ytjP	Putative dipeptidase YtjP OS	52.48	1	21	21	53	1.092	1.293	2.197			O34944
											mNWEVEVIR	1		N-Term(iTRAQ4plex)	1.044	1.377	1.655	3.78	2	660.349	1319.69	0.91	47.3
											gAIDDkGPTMAAFYALk	8		N-Term(iTRAQ4plex); K6(iTRAQ4plex); K17(iTRAQ4plex)	0.906	1.463	2.626	7.53	3	734.405	2201.2	-0.48	47.16
											fVQVVTDk	2		N-Term(iTRAQ4plex); K8(iTRAQ4plex)	0.9	1.337	1.998	3.39	2	612.365	1223.72	-0.82	31.34
											ykEGQGGELGINIR	3		N-Term(iTRAQ4plex); K2(iTRAQ4plex)	1.174	1.199	1.347	5.58	3	608.007	1822.01	0.58	33.65
											gIIDASLLIPHRPNQAEPk	4		N-Term(iTRAQ4plex); K19(iTRAQ4plex)	1.309	1.236	2.573	4.78	3	786.458	2357.36	2.37	43.15
											kADLISIGGGTYAR	2		N-Term(iTRAQ4plex); K1(iTRAQ4plex)	0.972	1.147	1.579	4.42	3	570.667	1709.99	4.72	33.62
											yPVTAESk	2		N-Term(iTRAQ4plex); K8(iTRAQ4plex)	1.136	1.507	3.361	2.87	2	591.834	1182.66	-0.05	23.13
											tTDQkGEAAIENGQLILR	1		N-Term(iTRAQ4plex); K5(iTRAQ4plex)	0.818	0.934	0.905	3.57	3	749.085	2245.24	0.7	37.81
											eGQGGELGINIR	1		N-Term(iTRAQ4plex)	0.987	1.126	1.543	4.69	2	693.876	1386.75	-0.3	33.1
											aGVAFGPLFPGRPDSAHQkDEYIEIDDLLR	1		N-Term(iTRAQ4plex); K19(iTRAQ4plex)	1.274	0.763	2.085	5.43	4	904.479	3614.89	2.49	58.31
											vYEGQLGk	2		N-Term(iTRAQ4plex); K8(iTRAQ4plex)	0.903	1.474	2.005	3.13	2	591.343	1181.68	1.29	26.61
											dSkPHHVSADHPLVk	2		N-Term(iTRAQ4plex); K3(iTRAQ4plex); K15(iTRAQ4plex)	0.909	1.15	2.286	3.72	4	525.549	2099.17	1.06	17.03
											lNMVPDAAEAVIEGPk	2		N-Term(iTRAQ4plex); K16(iTRAQ4plex)	1.285	1.9	2.496	5.48	3	648.026	1942.06	3.43	49.36
											gPTMAAFYALk	2		N-Term(iTRAQ4plex); K11(iTRAQ4plex)	1.122	1.216	2.478	4.32	2	729.41	1457.81	3.71	49.92
											aDLISIGGGTYAR	1		N-Term(iTRAQ4plex)	1.112	0.888	1.227	3.22	2	719.395	1437.78	-0.05	38.89
											dMNLPLSk	4		N-Term(iTRAQ4plex); K8(iTRAQ4plex)	1.009	1.057	1.642	3.08	2	603.343	1205.68	-1.04	31.59
											hEEMPTMGFAPDADFPIINAEk	1		N-Term(iTRAQ4plex); K22(iTRAQ4plex)	1.525	2.177	2.465	6.97	3	916.779	2748.32	-0.91	51.44
											mIIGTDEESDWR	1		N-Term(iTRAQ4plex)	0.966	1.488	2.098	4.33	2	798.379	1595.75	1.18	37.19
											sTALYAQAIYELAk	8		N-Term(iTRAQ4plex); K14(iTRAQ4plex)	0.438	1.076	1.289	4.22	3	610.679	1830.02	-1.45	56.57
											dEYIEIDDLLR	1		N-Term(iTRAQ4plex)	1.192	1.323	1.872	4.78	2	769.398	1537.79	0.95	52.92
											aVLVSFQSGLR	4		N-Term(iTRAQ4plex)	0.926	1.275	2.843	4.05	2	660.892	1320.78	1.5	44.9
O34411	hisK	Histidinol-phosphatase OS	30.97	1	6	6	6	1.002	1.502	2.421			O34411
											kTYAGGIYIEDWMLNEAk	1		N-Term(iTRAQ4plex); K1(iTRAQ4plex); K18(iTRAQ4plex)	1.685	2.082	2.518	5.4	3	845.45	2534.33	0.86	55.77
											kIPLVFGSDAHQAGDVGYAYEAFLER	1		N-Term(iTRAQ4plex); K1(iTRAQ4plex)				8.24	4	786.164	3141.63	2.73	57.04
											lFPYSMSEHIR	1		N-Term(iTRAQ4plex)	0.74	1.519	3.013	3.89	3	508.597	1523.78	-1.59	42.54
											dSAMAQASLER	1		N-Term(iTRAQ4plex)	0.934	1.627	2.705	3.88	2	661.828	1322.65	-0.5	25.18
											qYAEEALk	1		N-Term(iTRAQ4plex); K8(iTRAQ4plex)	0.827	0.95	1.33	2.64	2	620.344	1239.68	-1.81	24.79
											yIHEISGLk	1		N-Term(iTRAQ4plex); K9(iTRAQ4plex)	0.824	1.33	2.539	3.76	3	449.935	1347.79	2.88	36.25
O31636	yjcN	Uncharacterized protein YjcN OS	12.26	1	1	1	6	0.948	0.645	1.314			O31636
											gYPYQSYFAVLQk	6		N-Term(iTRAQ4plex); K13(iTRAQ4plex)	1.018	0.744	1.686	6.18	3	618.002	1851.99	1.69	54.03
O07550	yheI	Probable multidrug resistance ABC transporter ATP-binding/permease protein YheI OS	2.56	1	1	1	1	1.111	0.936	1.58			O07550
											gWIGYVPQDHLLFSR	1		N-Term(iTRAQ4plex)	1.111	0.936	1.58	5.51	3	644.681	1932.03	2.08	53.96
O34788	bdhA	(R,R)-butanediol dehydrogenase OS	43.35	1	14	14	51	1.679	0.807	0.895			O34788
											iEHIEEPkTEPGk	2		N-Term(iTRAQ4plex); K8(iTRAQ4plex); K13(iTRAQ4plex)	1.665	0.804	1.036	4.8	3	647.036	1939.09	4.27	24.49
											kIVLDDLIEEGFGALIk	3		N-Term(iTRAQ4plex); K1(iTRAQ4plex); K17(iTRAQ4plex)	2.011	0.859	1.096	6.59	3	769.13	2305.38	0.78	76.73
											gAEIHPNDIVIk	7		N-Term(iTRAQ4plex); K12(iTRAQ4plex)	1.799	0.765	1.033	5.62	3	531.978	1593.92	-0.84	30.54
											tDDVVAEIAER	1		N-Term(iTRAQ4plex)	1.5	0.866	0.78	4.27	2	681.354	1361.7	-1.09	39.55
											lPDELSYEQGALVEPSAVALYAVR	5		N-Term(iTRAQ4plex)	1.006	0.964	0.648	6.23	3	912.156	2734.45	3.89	59.75
											iVLDDLIEEGFGALIk	1		N-Term(iTRAQ4plex); K16(iTRAQ4plex)	1.145	0.63	0.749	4.45	3	678.401	2033.19	4.83	79.8
											aEELGAIIVDPSkTDDVVAEIAER	3		N-Term(iTRAQ4plex); K13(iTRAQ4plex)	1.311		0.607	6.97	4	707.887	2828.53	4.51	55.8
											aAGATDIYAVELSPER	5		N-Term(iTRAQ4plex)	1.582	0.789	0.866	6.4	2	903.971	1806.94	-0.01	38.82
											iEHIEEPk	4		N-Term(iTRAQ4plex); K8(iTRAQ4plex)	1.834	0.831	0.95	3.8	3	428.246	1282.72	0.28	21.75
											tGGGVDVAFEVTGVPVVLR	2		N-Term(iTRAQ4plex)	1.536	0.99	0.536	6.46	2	1008.57	2016.13	2.89	58.75
											eGYFSADk	2		N-Term(iTRAQ4plex); K8(iTRAQ4plex)	1.699	0.838	0.791	3.6	2	602.807	1204.61	-1.95	25.34
											aEELGAIIVDPSk	3		N-Term(iTRAQ4plex); K13(iTRAQ4plex)	1.741	0.802	0.76	4.91	2	815.468	1629.93	-1.2	39.59
											gIIGYR	1		N-Term(iTRAQ4plex)	1.784	0.744	1.148	2.46	2	411.751	822.495	-0.02	27.08
											dIFPAVLSLMk	12		N-Term(iTRAQ4plex); K11(iTRAQ4plex)	1.725	0.823	0.925	3.96	2	761.453	1521.9	1.89	66.57
P94559	ysnB	Putative metallophosphoesterase YsnB OS	27.81	1	4	4	7	0.884	1.098	2.152			P94559
											hPALEPYAVVk	3		N-Term(iTRAQ4plex); K11(iTRAQ4plex)	1.01	1.473	3.631	4.4	3	504.635	1511.89	5.49	32.94
											qTLLNVYYR	1		N-Term(iTRAQ4plex)	0.952	1.499	2.056	3.23	2	657.371	1313.73	0.3	42.12
											lMINPGSIR	2		N-Term(iTRAQ4plex)	0.906	1.079	1.947	3.2	2	572.835	1144.66	0.07	40.4
											rTESYAILTLENDAATVR	1		N-Term(iTRAQ4plex)	0.809	0.792	0.825	6.53	3	723.057	2167.16	4.17	48.97
O31764	ymfF	Probable inactive metalloprotease YmfF OS	20.89	1	9	9	19	1.347	1.487	2.293			O31764
											tVSLIFk	1		N-Term(iTRAQ4plex); K7(iTRAQ4plex)	1.264	1.501	1.686	3.11	2	548.353	1095.7	-2.15	41.45
											nFEQAVSIIAEQFQAMk	2		N-Term(iTRAQ4plex); K17(iTRAQ4plex)	1.147	1.167	0.914	4.59	3	748.065	2242.18	1.21	78.52
											tLGMIENNHADEk	2		N-Term(iTRAQ4plex); K13(iTRAQ4plex)	1.101	1.314	1.188	5.61	3	587.303	1759.89	2.46	27.68
											lNIGYR	1		N-Term(iTRAQ4plex)	1.276	1.624	2.587	2.56	2	440.262	879.517	0.57	30.08
											iQAVYDDk	1		N-Term(iTRAQ4plex); K8(iTRAQ4plex)	1.456	1.852	2.15	3.46	2	620.344	1239.68	-0.73	28.06
											aLLPHVLLR	4		N-Term(iTRAQ4plex)	1.509	1.468	3.545	4.34	3	392.597	1175.78	2.53	42.56
											eVIDEEDVk	1		N-Term(iTRAQ4plex); K9(iTRAQ4plex)	1.369	1.601	2.566	4.25	2	682.363	1363.72	-1.18	26.15
											iQLDTTYFLk	5		N-Term(iTRAQ4plex); K10(iTRAQ4plex)	1.367	1.417	2.257	3.94	2	765.444	1529.88	-0.09	51.69
											aSLAYYAASR	2		N-Term(iTRAQ4plex)	1.321	1.437	2.256	3.81	2	608.827	1216.65	2.46	33.05
Q02112	lytA	Membrane-bound protein LytA OS	14.71	1	1	1	1	0.954	1.241	2.116			Q02112
											sQGEDVSPDSNIETk	1		N-Term(iTRAQ4plex); K15(iTRAQ4plex)	0.954	1.241	2.116	4.47	2	947.468	1893.93	0.57	22.9
P94521	ysdC	Putative aminopeptidase YsdC OS	34.07	1	11	11	35	1.085	1.722	2.801			P94521
											yIHTHAAMLHRDDYENAVk	1		N-Term(iTRAQ4plex); K19(iTRAQ4plex)	0.757	1.567	2.26	4.79	4	643.83	2572.3	0.69	29.34
											lGSLIAk	3		N-Term(iTRAQ4plex); K7(iTRAQ4plex)	1.034	2.053	2.76	2.91	2	495.333	989.66	-0.18	33.87
											yIHTHAAMLHR	4		N-Term(iTRAQ4plex)	0.995	2.042	3.649	4.79	4	374.204	1493.79	0.83	22.95
											kGEITGVIGSkPPHILSPEAR	2		N-Term(iTRAQ4plex); K1(iTRAQ4plex); K11(iTRAQ4plex)	0.792	0.826	1.365	4.63	4	655.391	2618.54	1.89	36.24
											lITEVIk	2		N-Term(iTRAQ4plex); K7(iTRAQ4plex)	0.885	1.33	2.212	3.16	2	552.367	1103.73	-1.34	36.12
											sVEIkDMFIDIGASSR	1		N-Term(iTRAQ4plex); K5(iTRAQ4plex)	1.242	1.858	4.318	5.17	3	686.041	2056.11	4.36	54.05
											gPQIIVYDASmVSHk	1		N-Term(iTRAQ4plex); M11(Oxidation); K15(iTRAQ4plex)	0.965	0.892	2.633	5.8	3	650.351	1949.04	-1.23	40.17
											sYIEPFADEVTTDR	4		N-Term(iTRAQ4plex)	1.111	1.929	3.172	4.75	2	893.935	1786.86	1.15	41.85
											dMFIDIGASSR	2		N-Term(iTRAQ4plex)	0.959	1.442	2.506	3.86	2	678.341	1355.67	0.16	40.95
											gPQIIVYDASMVSHk	10		N-Term(iTRAQ4plex); K15(iTRAQ4plex)	1.537	1.791	5.163	8.19	3	645.023	1933.05	4.12	44.05
											gEITGVIGSkPPHILSPEAR	2		N-Term(iTRAQ4plex); K10(iTRAQ4plex)	0.916	1.568	3.165	4.83	3	782.787	2346.35	3.24	38.66
											nLQNTDHPNIVYGVGTVQEEVGLR	3		N-Term(iTRAQ4plex)	1.275	2.024	2.519	7.48	3	932.82	2796.45	2.16	47.56
P31103	ndk	Nucleoside diphosphate kinase OS	51.01	1	9	9	44	1.336	2.656	3.999			P31103
											vTEQMAEk	3		N-Term(iTRAQ4plex); K8(iTRAQ4plex)	1.624	4.127	4.421	4.03	2	612.33	1223.65	-0.67	19.2
											eINIFFk	5		N-Term(iTRAQ4plex); K7(iTRAQ4plex)	1.256	2.719	4.362	3.14	2	599.856	1198.7	-2.04	46.93
											gLQLAGAk	1		N-Term(iTRAQ4plex); K8(iTRAQ4plex)	1.207	1.412	2.637	3.13	2	523.328	1045.65	-11.7	24.77
											eALPGTIR	8		N-Term(iTRAQ4plex)	1.219	2.135	3.886	2.95	2	500.798	1000.59	-2.99	23.96
											nIIHGSDSLESAER	3		N-Term(iTRAQ4plex)	0.998	1.363	1.955	6.52	3	557.953	1671.85	1.96	26.01
											gDYGMFVGk	6		N-Term(iTRAQ4plex); K9(iTRAQ4plex)	1.401	2.839	6.26	4.24	2	631.33	1261.65	3.5	35.46
											tFIMVkPDGVQR	6		N-Term(iTRAQ4plex); K6(iTRAQ4plex)	1.562	3.833	4.933	4.43	3	560.325	1678.96	3.5	33.45
											qLIGDILSR	9		N-Term(iTRAQ4plex)	1.519	3.175	4.342	3.3	2	579.854	1158.7	2.95	45.17
											kGLQLAGAk	3		N-Term(iTRAQ4plex); K1(iTRAQ4plex); K9(iTRAQ4plex)	1.328	2.888	4.497	4.16	3	439.96	1317.87	5.52	22.65
P54542	yqjE	Uncharacterized protein YqjE OS	46.36	1	17	17	53	0.99	1.282	2.192			P54542
											vGNIIVAAPTQAk	3		N-Term(iTRAQ4plex); K13(iTRAQ4plex)	1.014	1.446	1.945	4.56	2	785.484	1569.96	2.49	33.68
											iDEETTANIGR	3		N-Term(iTRAQ4plex)	0.957	1.356	1.921	4.03	2	681.853	1362.7	0.43	26.15
											aGLAAMFEAIk	5		N-Term(iTRAQ4plex); K11(iTRAQ4plex)	0.955	1.372	2.54	5.13	2	705.408	1409.81	1.49	57.6
											sLVPEk	1		N-Term(iTRAQ4plex); K6(iTRAQ4plex)	1.037	1.142	2.389	2.53	2	480.804	960.6	3.71	25.27
											sMITASYGYALDSDGk	3		N-Term(iTRAQ4plex); K16(iTRAQ4plex)	0.936	0.996	1.446	5.54	2	983.989	1966.97	1.38	41.93
											gISAITIASk	5		N-Term(iTRAQ4plex); K10(iTRAQ4plex)	1.123	1.265	3.338	4.75	2	624.893	1248.78	2.1	35.38
											mEAQVQk	3		N-Term(iTRAQ4plex); K7(iTRAQ4plex)	1	1.532	2.317	3.27	2	561.317	1121.63	3.47	19.36
											tDGTTILGADDk	2		N-Term(iTRAQ4plex); K12(iTRAQ4plex)	0.91	1.435	1.609	4.97	2	747.898	1494.79	0.22	26.73
											yQDGDQVVEIAk	5		N-Term(iTRAQ4plex); K12(iTRAQ4plex)	1.148	1.272	2.332	5.37	2	826.94	1652.87	-0.86	30.9
											fSDLGVDVk	1		N-Term(iTRAQ4plex); K9(iTRAQ4plex)	0.947	1.248	1.541	3.58	2	634.361	1267.71	0.29	34.79
											aAFEEAAADMGGR	4		N-Term(iTRAQ4plex)	0.936	1.085	1.903	5.15	3	480.563	1439.67	2.81	33.73
											tAEMVVAIIEEAAk	5		N-Term(iTRAQ4plex); K14(iTRAQ4plex)	0.865	1.713	1.792	5.45	3	588.337	1763	5.15	67.9
											mPIEELVk	5		N-Term(iTRAQ4plex); K8(iTRAQ4plex)	0.794	0.909	2.2	3.3	2	623.871	1246.74	2.65	44.02
											aEVEIEVMYPGFk	4		N-Term(iTRAQ4plex); K13(iTRAQ4plex)	0.996	1.187	2.525	5.12	2	900.481	1799.95	2.86	49.05
											tAHAGVEPEk	1		N-Term(iTRAQ4plex); K10(iTRAQ4plex)	0.806	0.906	1.588	3.93	3	442.913	1326.73	-0.35	14.91
											aAIFGk	1		N-Term(iTRAQ4plex); K6(iTRAQ4plex)	1.164	1.322	2.531	2.43	2	447.787	894.567	1.61	27.08
											kFSDLGVDVk	2		N-Term(iTRAQ4plex); K1(iTRAQ4plex); K10(iTRAQ4plex)	0.95	1.051	1.266	4.57	3	513.976	1539.91	1.81	32.7
P24011	ctaC	Cytochrome c oxidase subunit 2 OS	2.53	1	1	1	1	1.151	1.087	1.699			P24011
											sTAESDLAk	1		N-Term(iTRAQ4plex); K9(iTRAQ4plex)	1.151	1.087	1.699	2.97	2	605.331	1209.66	-0.7	16.33
P70945	yitS	DegV domain-containing protein YitS OS	15.55	1	3	3	8	0.872	1.152	1.659			P70945
											hLIEEAFkPk	3		N-Term(iTRAQ4plex); K8(iTRAQ4plex); K10(iTRAQ4plex)	0.819	1.089	1.785	4.08	4	411.753	1643.99	3.48	30.95
											eIIMHPISSAIGSHAGPGTLAIFFLR	2		N-Term(iTRAQ4plex)				6.07	4	720.651	2879.58	4	64.28
											gIGFIPLR	3		N-Term(iTRAQ4plex)	0.921	1.073	1.588	2.81	2	508.824	1016.64	3.49	45.81
P54537	artM	Arginine transport ATP-binding protein ArtM OS	6.67	1	1	1	2	1.49	1.053	1.358			P54537
											eNIGMVFQHFHLFPHk	2		N-Term(iTRAQ4plex); K16(iTRAQ4plex)	1.779	1.037	1.599	6.1	4	568.056	2269.2	2.75	53.91
P54154	msrA	Peptide methionine sulfoxide reductase MsrA OS	38.98	1	5	5	9	1.095	1.243	1.99			P54154
											aAIFYHNDk	2		N-Term(iTRAQ4plex); K9(iTRAQ4plex)	1.019	1.183	1.725	3.53	3	456.249	1366.73	-1.38	25.24
											aGFISEHWGAk	2		N-Term(iTRAQ4plex); K11(iTRAQ4plex)	1	1.126	2.31	3.64	3	497.605	1490.8	1.17	36.49
											eAVQITFHPDVFPYEk	2		N-Term(iTRAQ4plex); K16(iTRAQ4plex)	1.237	1.308	2.108	7.95	3	736.728	2208.17	4.65	48.51
											lAESGIFkDPIVTDILk	1		N-Term(iTRAQ4plex); K8(iTRAQ4plex); K17(iTRAQ4plex)	1.186	1.462	1.703	5.3	3	764.459	2291.36	2	60.21
											aEPFYEAEGYHQHFYk	2		N-Term(iTRAQ4plex); K16(iTRAQ4plex)	1.053	1.187	2.117	7.19	3	768.703	2304.09	-0.61	35.09
P36949	rbsB	D-ribose-binding protein OS	37.38	1	14	14	41	1.207	3.108	4.754			P36949
											tISAPLkLETQk	3		N-Term(iTRAQ4plex); K7(iTRAQ4plex); K12(iTRAQ4plex)	1.411	5.391	7.382	4.26	3	587.701	1761.09	1.52	32.51
											lATEAADDILHGk	4		N-Term(iTRAQ4plex); K13(iTRAQ4plex)	1.567	5.279	6.772	6.03	3	547.973	1641.91	0.44	41.75
											kLSATVAQQPELIGk	6		N-Term(iTRAQ4plex); K1(iTRAQ4plex); K15(iTRAQ4plex)	1.942	8.441	9.274	6.06	2	1008.11	2015.21	-5.56	33.93
											lSATVAQQPELIGk	4		N-Term(iTRAQ4plex); K14(iTRAQ4plex)	1.447	4.709	4.403	5.09	2	872.016	1743.02	-0.4	36.03
											gGEMAAAFIADk	2		N-Term(iTRAQ4plex); K12(iTRAQ4plex)	1.205	2.044	3.168	4.56	2	734.889	1468.77	0.02	43.6
											lQVVTk	1		N-Term(iTRAQ4plex); K6(iTRAQ4plex)	1.633	5.548	9.705	2.52	2	488.326	975.645	0.8	23.88
											vETLVASDNVk	1		N-Term(iTRAQ4plex); K11(iTRAQ4plex)	1.418	5.034	3.579	4.24	2	731.925	1462.84	4.87	30.12
											dILVIGFDGNkDALASIk	2		N-Term(iTRAQ4plex); K11(iTRAQ4plex); K18(iTRAQ4plex)	1.539	4.102	6.204	5.88	3	774.457	2321.36	5.42	54.65
											dALASIkDR	1		N-Term(iTRAQ4plex); K7(iTRAQ4plex)	1.583	3.431	6.173	3.17	3	426.25	1276.74	-8.05	27.94
											gSGFHNIADQk	7		N-Term(iTRAQ4plex); K11(iTRAQ4plex)	1.256	4.528	11.715	4.46	2	731.388	1461.77	0.14	21.78
											dALASIk	4		N-Term(iTRAQ4plex); K7(iTRAQ4plex)	1.259	2.211	3.554	2.89	2	503.312	1005.62	-1.06	27.07
											tISAPLk	1		N-Term(iTRAQ4plex); K7(iTRAQ4plex)	0.949	2.397	3.359	2.8	2	509.332	1017.66	1.53	24.72
											vAELEGVPGASATR	4		N-Term(iTRAQ4plex)	1.495	3.878	4.042	4.35	2	750.911	1500.81	0.15	32.91
											dILVIGFDGNk	1		N-Term(iTRAQ4plex); K11(iTRAQ4plex)	1.061	1.709	2.479	3.74	2	739.929	1478.85	2.8	44.56
P42176	narH	Nitrate reductase beta chain OS	5.95	1	2	2	3	1.423	0.573	0.662			P42176
											iPIDYLAQLLTAGDTDHIR	1		N-Term(iTRAQ4plex)	1.697	0.443	0.789	6.52	3	757.082	2269.23	0.42	77.48
											iALPLHPEYR	2		N-Term(iTRAQ4plex)	1.297	0.633	0.416	3.48	3	451.6	1352.79	3.3	39.02
O07009	cycB	Cyclodextrin-binding protein OS	2.61	1	1	1	1	0.868	1.529	2.457			O07009
											qALDQAAETAk	1		N-Term(iTRAQ4plex); K11(iTRAQ4plex)	0.868	1.529	2.457	4.44	2	717.395	1433.78	-0.35	21.26
O32072	ytwF	Uncharacterized protein YtwF OS	64.08	1	7	7	14	0.872	1.586	2.584			O32072
											ekIEADEELYLIDVR	1		N-Term(iTRAQ4plex); K2(iTRAQ4plex)	1.1	1.057	1.65	6.95	3	708.389	2123.15	1.95	44.95
											iEADEELYLIDVREDEEVAEGMIPQAVHIR	1		N-Term(iTRAQ4plex)	1.678	1.352	1.504	7.77	4	907.216	3625.84	7.13	65.41
											tVNVEGGMMAWEGETkPk	2		N-Term(iTRAQ4plex); K16(iTRAQ4plex); K18(iTRAQ4plex)	0.719	1.91	2.987	8.41	3	799.416	2396.23	1.05	41.92
											iEADEELYLIDVR	1		N-Term(iTRAQ4plex)	0.745	1.739	2.996	5.41	2	861.46	1721.91	3.27	50.76
											yLDEQGFk	3		N-Term(iTRAQ4plex); K8(iTRAQ4plex)	0.872	1.834	3.447	3.62	2	644.345	1287.68	-0.32	33.31
											eDEEVAEGMIPQAVHIR	2		N-Term(iTRAQ4plex)	0.977	1.422	1.646	6.01	3	689.682	2067.03	0.79	40.59
											tVNVEGGmMAWEGETkPk	1		N-Term(iTRAQ4plex); M8(Oxidation); K16(iTRAQ4plex); K18(iTRAQ4plex)	0.946	1.198	1.547	4.15	3	804.75	2412.23	3.2	39.54
											eISTAALk	3		N-Term(iTRAQ4plex); K8(iTRAQ4plex)	0.857	1.837	3.252	3.66	2	560.844	1120.68	0.05	27.82
O06724	yisK	Uncharacterized protein YisK OS	18.6	1	3	3	4	1.147	1.778	2.712			O06724
											sPVTVTGHGDIVk	2		N-Term(iTRAQ4plex); K13(iTRAQ4plex)	1.071	2.681	4.589	5.9	3	533.31	1597.92	0.59	27.03
											iSkEDAYDHVFGYTIVNDITAR	1		N-Term(iTRAQ4plex); K3(iTRAQ4plex)	1.552	2.04	2.157	4.4	3	939.158	2815.46	3.57	52.99
											dHAIEMGSEADIPEHPMVFTk	1		N-Term(iTRAQ4plex); K21(iTRAQ4plex)	1.038	1.053	1.861	7.17	4	661.327	2642.28	0.35	41.56
P06628	spo0F	Sporulation initiation phosphotransferase F OS	23.39	1	2	2	2	0.785	1.749	2.928			P06628
											eLGALTHFAkPFDIDEIR	1		N-Term(iTRAQ4plex); K10(iTRAQ4plex)	0.772	1.716	2.603	4.65	4	590.828	2360.29	1.53	53.86
											eRPDLVLLDMk	1		N-Term(iTRAQ4plex); K11(iTRAQ4plex)	0.799	1.782	3.253	5.64	3	539.647	1616.93	-0.39	45.38
O34857	rok	Repressor rok OS	42.93	1	6	6	24	0.893	1.353	1.732			O34857
											eSGLEIPNMTTFMQSLIk	5		N-Term(iTRAQ4plex); K18(iTRAQ4plex)	1.01	0.773	1.225	4.97	3	776.414	2327.23	1.83	76.79
											lRLEQLNEAEVk	1		N-Term(iTRAQ4plex); K12(iTRAQ4plex)	0.86	1.228	2.008	5.4	3	577.341	1730.01	2.57	37.49
											lEQLNEAEVk	3		N-Term(iTRAQ4plex); K10(iTRAQ4plex)	0.886	1.425	1.372	4.91	2	730.914	1460.82	0.71	29.73
											kPDSLPVLAELAAQEIR	5		N-Term(iTRAQ4plex); K1(iTRAQ4plex)		0.664	1.856	7.16	4	535.317	2138.25	1.33	59.3
											eIEkESGLEIPNMTTFMQSLIk	2		N-Term(iTRAQ4plex); K4(iTRAQ4plex); K22(iTRAQ4plex)	1.267	2.36	2.216	5.95	3	990.869	2970.59	1.26	72.07
											sYQPQSQQQSVQPQLQSISSLPAGIPDGTTR	8		N-Term(iTRAQ4plex)				5.45	3	1157.6	3470.79	6.36	47.22
O31581	yfhM	AB hydrolase superfamily protein YfhM OS	5.59	1	1	1	1	1.089	0.818	1.338			O31581
											kGSLAEkPSYETVPYR	1		N-Term(iTRAQ4plex); K1(iTRAQ4plex); K7(iTRAQ4plex)	1.089	0.818	1.338	3.74	4	565.07	2257.26	1.61	28.79
O07597	dat	D-alanine aminotransferase OS	13.12	1	3	3	4	1.072	1.694	2.734			O07597
											kHQYEAGLEPQTTAYTFTVk	2		N-Term(iTRAQ4plex); K1(iTRAQ4plex); K20(iTRAQ4plex)	1.135	2.745	3.831	6.18	4	686.871	2744.46	0.65	37.7
											gVLFGLR	1		N-Term(iTRAQ4plex)	1.159	1.529	3.279	2.92	2	453.29	905.573	4.66	43.71
											sEASIDLEDR	1		N-Term(iTRAQ4plex)	0.986	1.25	1.653	3.77	2	639.818	1278.63	-0.29	26.2
P42919	rplB	50S ribosomal protein L2 OS	60.65	1	15	15	72	1.384	0.66	0.893			P42919
											dkDGIPGR	1		N-Term(iTRAQ4plex); K2(iTRAQ4plex)	1.465	0.565	0.856	2.77	3	382.555	1145.65	-1.63	14.6
											rGMTTSDFAEITTDkPEk	1		N-Term(iTRAQ4plex); K15(iTRAQ4plex); K18(iTRAQ4plex)	0.738	0.69	0.848	2.99	3	820.432	2459.28	-0.3	34.48
											sANIALINYADGEkR	4		N-Term(iTRAQ4plex); K14(iTRAQ4plex)	1.433	0.777	0.842	4.38	2	962.026	1923.05	-4.49	35.33
											gIQVGTEIMSGPEADIk	7		N-Term(iTRAQ4plex); K17(iTRAQ4plex)	1.377	0.847	0.981	6.89	3	678.365	2033.08	-0.82	44.58
											sLLAPLHk	5		N-Term(iTRAQ4plex); K8(iTRAQ4plex)	1.299	0.558	0.788	3.95	3	389.588	1166.75	-1.13	31.33
											gmTTSDFAEITTDkPEk	2		N-Term(iTRAQ4plex); M2(Oxidation); K14(iTRAQ4plex); K17(iTRAQ4plex)	1.401	0.61	0.972	6.62	4	580.549	2319.17	-0.69	31.77
											kSPmSPWGkPTLGFk	1		K1(iTRAQ4plex); N-Term(iTRAQ4plex); M4(Oxidation); K9(iTRAQ4plex); K15(iTRAQ4plex)	1.463	0.809	1.009	4.06	4	564.079	2253.29	0.62	37.5
											sPmSPWGkPTLGFk	1		N-Term(iTRAQ4plex); M3(Oxidation); K8(iTRAQ4plex); K14(iTRAQ4plex)	1.322	0.832	0.976	4.1	3	661.035	1981.09	-1.37	40.86
											sAGTSAQVLGk	5		N-Term(iTRAQ4plex); K11(iTRAQ4plex)	1.65	0.737	0.669	5.06	2	653.882	1306.76	-0.31	21.8
											sANIALINYADGEk	6		N-Term(iTRAQ4plex); K14(iTRAQ4plex)	1.528	0.784	0.612	6.18	3	589.655	1766.95	-0.94	41.68
											sPMSPWGkPTLGFk	5		N-Term(iTRAQ4plex); K8(iTRAQ4plex); K14(iTRAQ4plex)	1.585	0.692	1.011	5.44	4	492.032	1965.11	3.29	44.31
											vATVEYDPNR	4		N-Term(iTRAQ4plex)	1.489	0.744	0.675	4.31	2	654.339	1307.67	-0.03	25.55
											vGNALPLINIPVGTVVHNIELkPGk	8		N-Term(iTRAQ4plex); K22(iTRAQ4plex); K25(iTRAQ4plex)	2.049	1.077	1.092	7.99	3	1008.95	3024.84	2.58	60.28
											gMTTSDFAEITTDkPEk	3		N-Term(iTRAQ4plex); K14(iTRAQ4plex); K17(iTRAQ4plex)	1.423	0.48	0.824	7.78	3	768.397	2303.18	-1.1	37.28
											kSPMSPWGkPTLGFk	6		N-Term(iTRAQ4plex); K1(iTRAQ4plex); K9(iTRAQ4plex); K15(iTRAQ4plex)	1.782	0.75	0.794	5.79	5	448.265	2237.3	-0.01	40.11
											aSIGQVGNEQHELINIGk	9		N-Term(iTRAQ4plex); K18(iTRAQ4plex)	1.797	0.556	1.061	8.15	3	732.405	2195.2	-0.73	36.08
											yILAPk	2		N-Term(iTRAQ4plex); K6(iTRAQ4plex)	1.408	0.649	0.868	2.56	2	496.824	992.64	2.03	29.88
											gSVMNPNDHPHGGGEGR	2		N-Term(iTRAQ4plex)	1.728	0.391	0.956	4.21	3	621.287	1861.85	-1.1	15.76
O06478	yfmT	Putative aldehyde dehydrogenase YfmT OS	16.49	1	8	8	9	0.999	0.897	1.511			O06478
											tVEQAIEEGAVPVk	1		N-Term(iTRAQ4plex); K14(iTRAQ4plex)	0.847	0.897	1.39	4.42	2	879.497	1757.99	-0.97	39.89
											wQEGSSPNVLENkNPYTQk	1		N-Term(iTRAQ4plex); K13(iTRAQ4plex); K19(iTRAQ4plex)	1.808	0.971	1.841	3.93	4	663.601	2651.38	1.77	36.66
											wISVQHEk	1		N-Term(iTRAQ4plex); K8(iTRAQ4plex)	0.744	0.773	1.921	3.78	3	438.919	1314.74	2.05	28.95
											wQEGSSPNVLENk	1		N-Term(iTRAQ4plex); K13(iTRAQ4plex)	0.808	0.908	1.347	3.2	2	888.463	1775.92	0.82	34.27
											iISFTGSTk	1		N-Term(iTRAQ4plex); K9(iTRAQ4plex)	1.163	0.874	1.071	2.99	2	621.37	1241.73	-1.84	34.29
											mFQYEELNk	1		N-Term(iTRAQ4plex); K9(iTRAQ4plex)	0.822	1.023	1.262	4.13	2	745.382	1489.76	-2.31	38.38
											aAFEIGLVk	2		N-Term(iTRAQ4plex); K9(iTRAQ4plex)	0.833	0.787	1.467	2.94	2	618.384	1235.76	0.46	43.64
											eELFGPVVSFMk	1		N-Term(iTRAQ4plex); K12(iTRAQ4plex)	1.107	1.228	2.148	3.52	3	557.643	1670.91	4.78	61.17
O31562	yfiT	Putative metal-dependent hydrolase YfiT OS	9.55	1	1	1	2	1.094	0.62	1.055			O31562
											tADPSGSLALLQELHGR	2		N-Term(iTRAQ4plex)	1.092	0.622	1.067	3.44	3	637.016	1909.03	3.58	45.85
P0CI76	rtp	Replication termination protein OS	9.84	1	1	1	1	1.012	1.154	1.873			P0CI76
											sLHELLDDGILk	1		N-Term(iTRAQ4plex); K12(iTRAQ4plex)	1.012	1.154	1.873	5.18	3	547.655	1640.95	2.42	47.73
O06976	crh	HPr-like protein Crh OS	10.59	1	1	1	1	0.911	1.936	2.925			O06976
											fTSDVFLEk	1		N-Term(iTRAQ4plex); K9(iTRAQ4plex)	0.911	1.936	2.925	3.83	2	687.381	1373.76	0.1	43.93
O05396	yrhD	Uncharacterized protein YrhD OS	40.63	1	7	7	22	1.057	1.238	1.987			O05396
											eLLAENEDAVSk	2		N-Term(iTRAQ4plex); K12(iTRAQ4plex)	0.995	1.18	1.875	5.57	2	803.431	1605.85	-2.19	29.42
											vGILDLLk	8		N-Term(iTRAQ4plex); K8(iTRAQ4plex)	0.937	1.376	2.196	3.48	2	579.888	1158.77	-0.62	56.7
											kVGILDLLk	2		N-Term(iTRAQ4plex); K1(iTRAQ4plex); K9(iTRAQ4plex)	1.123	1.171	2.079	5.23	3	477.66	1430.97	-1.27	47.61
											aMNDPDINR	2		N-Term(iTRAQ4plex)	1.003	1.198	2.011	2.77	2	595.292	1189.58	0.41	20.13
											aVGFGLQFLk	6		N-Term(iTRAQ4plex); K10(iTRAQ4plex)	0.972	0.95	1.863	4.83	2	684.416	1367.83	-2.55	52.96
											iALGQVSR	1		N-Term(iTRAQ4plex)	1.056	1.46	2.199	2.88	2	494.307	987.607	0.51	29.05
											lLESVMAGTEQAQSFLk	1		N-Term(iTRAQ4plex); K17(iTRAQ4plex)	0.862	1.333	1.263	3.7	3	714.058	2140.16	2.05	66.96
P94498	cysH	Phosphoadenosine phosphosulfate reductase OS	6.01	1	1	1	1	1.217	1.806	2.608			P94498
											eALSGHPAWLSGLR	1		N-Term(iTRAQ4plex)	1.217	1.806	2.608	3.69	3	546.634	1637.89	-0.32	43.11
O32437	comZ	ComG operon repressor OS	15.87	1	1	1	7	1.074	1.423	2.207			O32437
											sLEFLQIAMk	7		N-Term(iTRAQ4plex); K10(iTRAQ4plex)	1	1.38	2.281	4.62	2	734.431	1467.85	3.69	55.56
P26935	iolG	Inositol 2-dehydrogenase/D-chiro-inositol 3-dehydrogenase OS	9.3	1	3	3	5	0.996	2.195	3.613			P26935
											lVQVGFMR	2		N-Term(iTRAQ4plex)	1.023	3.436	5.858	2.88	2	547.319	1093.63	-0.33	43.11
											rYDSGYVQLk	1		N-Term(iTRAQ4plex); K10(iTRAQ4plex)	0.914	0.841	1.189	2.9	3	506.284	1516.84	0.38	27.08
											ekPEFYQSFTTVQN	2		N-Term(iTRAQ4plex); K2(iTRAQ4plex)	0.93	0.965	1.326	4.65	3	669.342	2006.01	0.21	40.41
O31630	yjcH	Uncharacterized protein YjcH OS	26.25	1	4	4	5	1.023	1.648	2.583			O31630
											wTYWQPLITPALk	2		N-Term(iTRAQ4plex); K13(iTRAQ4plex)	1.001	2.128	2.511	4.47	3	635.701	1905.09	0.75	61.03
											fIAHELVPFADDEYPTYQIGYGR	1		N-Term(iTRAQ4plex)	0.756	0.868	1.272	7.33	3	949.139	2845.4	2.95	58.11
											kLSDYDFEPFDGDHk	1		N-Term(iTRAQ4plex); K1(iTRAQ4plex); K15(iTRAQ4plex)	1.353	1.224	1.292	5.36	4	562.034	2245.11	0.49	39.4
											sIIIGVPYkDVk	1		N-Term(iTRAQ4plex); K9(iTRAQ4plex); K12(iTRAQ4plex)	1.044	1.4	2.788	4.33	3	588.705	1764.1	0.84	39.63
P96622	ndoA	mRNA interferase EndoA OS	10.34	1	1	1	1	0.832	0.995	1.799			P96622
											akLPTHVEIDAk	1		N-Term(iTRAQ4plex); K2(iTRAQ4plex); K12(iTRAQ4plex)	0.832	0.995	1.799	3.59	3	585.355	1754.05	-2.29	28.75
O34355	ytcJ	Putative amidohydrolase YtcJ OS	15.31	1	5	5	6	1.438	1.598	2.157			O34355
											gMEVAVHAIGDLAFEk	1		N-Term(iTRAQ4plex); K16(iTRAQ4plex)	1.529	1.356	2.055	4.63	3	659.025	1975.06	1.82	54.53
											mPIALDLQPHFVASDFPWVIDR	1		N-Term(iTRAQ4plex)	2.162	2.812	3.138	4.88	3	904.478	2711.42	1.67	74.24
											lFPDRPVLLk	1		N-Term(iTRAQ4plex); K10(iTRAQ4plex)	1.226	1.211	1.402	2.84	3	495.984	1485.94	-1.92	43.46
											lIHAQVLDNELIER	1		N-Term(iTRAQ4plex)	1.108	1.28	1.26	5.28	3	603.013	1807.02	2.44	43.6
											aVPPVSQHYVDEALTAAIk	2		N-Term(iTRAQ4plex); K19(iTRAQ4plex)	1.3	1.47	2.574	5.17	3	766.434	2297.29	5.77	51.28
O31501	swrC	Swarming motility protein SwrC OS	20.63	1	22	22	55	1.488	2.308	3.246			O31501
											kITSATGQEVk	4		N-Term(iTRAQ4plex); K1(iTRAQ4plex); K11(iTRAQ4plex)	2.034	2.394	4.01	6.63	3	531.99	1593.95	0.55	18.6
											lSDIATIk	9		N-Term(iTRAQ4plex); K8(iTRAQ4plex)	1.388	2.431	3.213	3.64	2	574.859	1148.71	-1.48	34
											dGkELDVNIk	2		N-Term(iTRAQ4plex); K3(iTRAQ4plex); K10(iTRAQ4plex)	1.388	1.923	2.96	3.97	3	521.641	1562.91	-1.93	27.12
											eALLEAGSTR	2		N-Term(iTRAQ4plex)	1.765	2.402	3.32	4.03	2	595.829	1190.65	1.16	26.54
											qVIQGSDVTTPLGLYTFGNEEk	3		N-Term(iTRAQ4plex); K22(iTRAQ4plex)	1.225	1.367	2.146	7.15	3	895.474	2684.41	2.22	49.97
											tMQLTYSPEPGETk	2		N-Term(iTRAQ4plex); K14(iTRAQ4plex)	1.564	2.838	3.298	4.79	3	623.988	1869.95	-0.21	33.32
											lGLTASQISQALMSQTSQEPLTTVk	5		N-Term(iTRAQ4plex); K25(iTRAQ4plex)				4.51	3	974.204	2920.6	2	60.23
											iTSATGQEVk	3		N-Term(iTRAQ4plex); K10(iTRAQ4plex)	2.01	4.226	4.313	3.89	2	661.383	1321.76	2.35	21.4
											lkEYGLDEDTVk	1		N-Term(iTRAQ4plex); K2(iTRAQ4plex); K12(iTRAQ4plex)	1.259	2.354	2.539	5.93	3	614.679	1842.02	-0.18	31.44
											vkEGSTSDTVSk	3		N-Term(iTRAQ4plex); K2(iTRAQ4plex); K12(iTRAQ4plex)	1.094	2.024	2.737	4.49	3	557.316	1669.93	-0.16	16.39
											kSLTGAPIk	1		N-Term(iTRAQ4plex); K1(iTRAQ4plex); K9(iTRAQ4plex)	1.245	1.56	2.181	4.21	3	449.629	1346.87	0.06	22.37
											sVVVSGDIETIk	3		N-Term(iTRAQ4plex); K12(iTRAQ4plex)	1.72	2.293	3.038	5.23	2	767.949	1534.89	-1.9	35.33
											aNDANTVEVADDVk	1		N-Term(iTRAQ4plex); K14(iTRAQ4plex)	1.984	2.827	4.331	5.94	2	874.949	1748.89	0.35	26.87
											qVEDSLVSk	1		N-Term(iTRAQ4plex); K9(iTRAQ4plex)	1.657	2.589	3.793	4.22	2	646.868	1292.73	-0.48	25.02
											dSIGINIVk	3		N-Term(iTRAQ4plex); K9(iTRAQ4plex)	1.371	1.544	2.191	3.9	2	623.882	1246.76	-2.97	36.97
											sVVVSGDIETIkDLk	2		N-Term(iTRAQ4plex); K12(iTRAQ4plex); K15(iTRAQ4plex)	1.122	1.525	3.245	6.56	3	679.073	2035.2	1.8	44.71
											eAENEAEkAEk	2		N-Term(iTRAQ4plex); K8(iTRAQ4plex); K11(iTRAQ4plex)	1.593	2.849	4.776	3.26	3	560.633	1679.88	1.13	13.61
											tMQLTYSPEPGETkk	1		N-Term(iTRAQ4plex); K14(iTRAQ4plex); K15(iTRAQ4plex)	1.364	2.959	4.327	5.97	3	714.722	2142.15	1.63	30.66
											ySLNSFPILTLSVSSDkDNLQELTk	1		N-Term(iTRAQ4plex); K17(iTRAQ4plex); K25(iTRAQ4plex)				8.25	4	811.952	3244.79	5.93	63.62
											eLDVNIk	1		N-Term(iTRAQ4plex); K7(iTRAQ4plex)	1.544	0.662	0.661	2.61	2	559.839	1118.67	3.79	30.47
											eYGLDEDTVk	1		N-Term(iTRAQ4plex); K10(iTRAQ4plex)	1.794	2.948	3.918	4.48	2	728.874	1456.74	-0.24	27.68
											sLTGAPIk	4		N-Term(iTRAQ4plex); K8(iTRAQ4plex)	1.467	2.333	3.017	3.39	2	537.841	1074.68	-0.41	24.1
P37571	clpC	Negative regulator of genetic competence ClpC/MecB OS	57.41	1	45	46	139	1.197	1.655	2.432			P37571
											nNPVLIGEPGVGk	4		N-Term(iTRAQ4plex); K13(iTRAQ4plex)	1.189	2.031	2.239	4.62	2	791.463	1581.92	-0.46	31.62
											tAIAEGLAQQIINNEVPEILR	2		N-Term(iTRAQ4plex)	0.77	0.855	0.599	6.05	3	812.792	2436.36	1.04	75.34
											kHLTEIVSLMSDQLTk	4		N-Term(iTRAQ4plex); K1(iTRAQ4plex); K16(iTRAQ4plex)	1.181	1.468	3.247	6.72	3	759.109	2275.31	2.85	49.74
											tkNNPVLIGEPGVGk	1		N-Term(iTRAQ4plex); K2(iTRAQ4plex); K15(iTRAQ4plex)	1.388	2.114	2.393	5.41	3	652.393	1955.17	0.08	29.86
											aLAESIFGDEESMIR	4		N-Term(iTRAQ4plex)	1.314	1.579	2.794	5.75	2	906.457	1811.91	5.04	53.44
											yVGFNVQDETQNHkDMk	1		N-Term(iTRAQ4plex); K14(iTRAQ4plex); K17(iTRAQ4plex)	1.127	1.861	3.098	6.89	4	622.066	2485.24	-3.73	29.45
											gQEmSQTIHYTPR	1		N-Term(iTRAQ4plex); M4(Oxidation)	1.291	1.019	2.944	3.93	3	569.946	1707.82	-1.29	20.1
											vSITDDAIEAAVk	3		N-Term(iTRAQ4plex); K13(iTRAQ4plex)	1.14	1.487	1.723	5.77	2	810.458	1619.91	-0.24	40.06
											iAQTETDkLLNMENILHSR	1		N-Term(iTRAQ4plex); K8(iTRAQ4plex)	0.619	1.398	1.586	5.55	4	629.347	2514.37	2.96	52.16
											rPIGSFIFLGPTGVGk	6		N-Term(iTRAQ4plex); K16(iTRAQ4plex)	0.961	1.015	0.935	5.41	3	645.387	1934.15	0.12	50.95
											lGHSYVGTEHILLGLIR	5		N-Term(iTRAQ4plex)	1.057	1.419	2.256	7.27	3	674.727	2022.17	2.5	54.32
											kLGHSYVGTEHILLGLIR	3		N-Term(iTRAQ4plex); K1(iTRAQ4plex)	1.598	2.022	3.495	7.89	3	765.46	2294.36	2.47	49.2
											eGEGIAAk	2		N-Term(iTRAQ4plex); K8(iTRAQ4plex)	1.336	1.629	2.514	3.23	2	531.805	1062.6	-0.75	16.06
											dAAVQSQEFEk	2		N-Term(iTRAQ4plex); K11(iTRAQ4plex)	1.178	1.304	1.842	4.36	2	770.399	1539.79	0.87	26.26
											yVGFNVQDETQNHk	4		N-Term(iTRAQ4plex); K14(iTRAQ4plex)	1.313	1.573	2.007	7.16	3	656.332	1966.98	-2.9	30.43
											ekDAAVQSQEFEk	1		N-Term(iTRAQ4plex); K2(iTRAQ4plex); K13(iTRAQ4plex)	1.234	1.622	2.333	7.27	3	647.681	1941.03	-0.89	22.77
											iQkEVESLIGR	2		N-Term(iTRAQ4plex); K3(iTRAQ4plex)	1.143	1.967	3.453	3.48	3	520.651	1559.94	0.65	45.46
											rkPYSVVLLDEIEk	3		N-Term(iTRAQ4plex); K2(iTRAQ4plex); K14(iTRAQ4plex)	1.03	1.277	1.638	5.64	3	707.763	2121.27	4.39	45.71
											eDSLDPVIGR	3		N-Term(iTRAQ4plex)	1.126	1.87	2.268	3.48	2	622.834	1244.66	-0.42	33.42
											lVGSPPGYVGYDEGGQLTEk	3		N-Term(iTRAQ4plex); K20(iTRAQ4plex)	1.304	1.969	2.561	5.76	2	1177.61	2354.21	0.24	39.36
											nTILIMTSNVGASELkR	2		N-Term(iTRAQ4plex); K16(iTRAQ4plex)	1.351	2.226	2.57	7.2	3	712.408	2135.21	-0.19	44.79
											gQEMSQTIHYTPR	3		N-Term(iTRAQ4plex)	0.919	0.982	1.706	6.08	3	564.615	1691.83	1.04	25.96
											fQPIQVDQPSVDESIQILQGLR	4		N-Term(iTRAQ4plex)	0.901	0.941	1.456	6.39	3	885.487	2654.45	7.15	64.03
											dLTAIAk	8		N-Term(iTRAQ4plex); K7(iTRAQ4plex)	1.31	1.772	3.168	3.15	2	510.321	1019.63	0.79	27.76
											vLALAQEEALR	3		N-Term(iTRAQ4plex)	1.135	1.703	1.741	4.44	2	678.903	1356.8	1.89	44.03
											lkEQDLSIELTDAAk	2		N-Term(iTRAQ4plex); K2(iTRAQ4plex); K15(iTRAQ4plex)	1.085	1.862	2.633	5.82	2	1053.61	2106.21	2.47	41.58
											lGHNNIGTEHILLGLVR	5		N-Term(iTRAQ4plex)	1.096	1.673	2.888	7.27	3	667.391	2000.16	3	46.7
											gQHIVLDVEDGEFVVk	6		N-Term(iTRAQ4plex); K16(iTRAQ4plex)	1.311	1.669	2.827	8.05	3	691.381	2072.13	1.17	46.8
											aHPDVFNILLQVLEDGR	1		N-Term(iTRAQ4plex)	1.223	1.391	2.798	6.27	3	694.052	2080.14	4.66	79.82
											kVIELSMDEAR	3		N-Term(iTRAQ4plex); K1(iTRAQ4plex)	1.23	1.302	2.744	5.15	3	526.964	1578.88	0.05	33.31
											vIELSMDEAR	1		N-Term(iTRAQ4plex)	1.23	1.677	2.341	4.15	2	653.844	1306.68	1.39	35.08
											hLTEIVSLMSDQLTk	4		N-Term(iTRAQ4plex); K15(iTRAQ4plex)	1.012	1.255	1.893	4.46	3	668.375	2003.11	1.11	54.85
											sFTTPPNLk	3		N-Term(iTRAQ4plex); K9(iTRAQ4plex)	1.263	1.966	2.964	3.07	2	646.878	1292.75	2.93	32.14
											vMTLDMGTVVAGTk	9		N-Term(iTRAQ4plex); K14(iTRAQ4plex)	1.237	1.832	2.338	5.27	2	855.975	1710.94	2.7	45.06
											vIGQDEAVVAVAk	2		N-Term(iTRAQ4plex); K13(iTRAQ4plex)	1.462	2.328	2.741	5.68	2	793.972	1586.94	0.27	34.47
											eQDLSIELTDAAk	2		N-Term(iTRAQ4plex); K13(iTRAQ4plex)	1.225	1.829	2.803	5.64	2	860.967	1720.93	3.5	35.65
											eVESLIGR	2		N-Term(iTRAQ4plex)	1.168	1.269	1.776	3.08	2	523.802	1046.6	-0.28	31.87
											aFRPEFINR	4		N-Term(iTRAQ4plex)	1.33	1.668	3.298	4.09	3	431.911	1293.72	0.5	33.87
											yIEkDAALER	1		N-Term(iTRAQ4plex); K4(iTRAQ4plex)	1.111	1.947	4.047	2.94	3	499.285	1495.84	2.25	27.72
											lSEELLR	1		N-Term(iTRAQ4plex)	1.299	1.803	2.5	2.59	2	502.3	1003.59	1.5	35.54
											iAQTETDk	2		N-Term(iTRAQ4plex); K8(iTRAQ4plex)	1.274	2.05	2.401	3.2	2	597.334	1193.66	-0.57	13.92
											kPYSVVLLDEIEk	5		N-Term(iTRAQ4plex); K1(iTRAQ4plex); K13(iTRAQ4plex)	1.151	1.684	3.214	6.5	3	655.728	1965.17	2.52	50.69
											rFQPIQVDQPSVDESIQILQGLR	2		N-Term(iTRAQ4plex)	0.881	0.608	0.931	9.23	3	937.519	2810.54	5.24	60.69
											iDEIIVFHSLEk	2		N-Term(iTRAQ4plex); K12(iTRAQ4plex)	1.099	1.499	1.838	5.36	2	866.004	1731	3.92	50.12
											vLNNLGVSLNk	2		N-Term(iTRAQ4plex); K11(iTRAQ4plex)	1.175	1.883	2.058	4.77	2	729.947	1458.89	-1.12	41.24
											lLNMENILHSR	4		N-Term(iTRAQ4plex)	1.411	2.558	2.549	5.01	3	495.278	1483.82	2.22	48
											vIEVLSR	1		N-Term(iTRAQ4plex)	1.208	1.638	2.153	2.54	2	480.304	959.6	-0.64	35.03
P38049	hmoB	Heme-degrading monooxygenase HmoB OS	29.52	1	4	4	10	1.312	1.731	2.433			P38049
											vENEPGFEAIR	1		N-Term(iTRAQ4plex)	1.134	1.785	1.632	4.05	2	702.867	1404.73	1.41	31.25
											aGkVENEPGFEAIR	2		N-Term(iTRAQ4plex); K3(iTRAQ4plex)	1.401	1.685	3.01	5.02	3	602.334	1804.99	3.58	31.16
											hPGFAVLNNIAVTQEGRPLFENR	2		N-Term(iTRAQ4plex)	2.116	1.762	3.405	5.96	4	681.619	2723.45	1.68	50.47
											vYITYGTADFLk	5		N-Term(iTRAQ4plex); K12(iTRAQ4plex)	1.187	1.794	2.45	4.54	2	839.971	1678.94	3.51	50.6
P31080	lexA	LexA repressor OS	37.07	1	4	4	9	0.975	0.98	1.143			P31080
											lQPENPTMEPIILQNVSILGk	3		N-Term(iTRAQ4plex); K21(iTRAQ4plex)	0.651	0.788	0.928	6.15	3	874.833	2622.49	2.82	63.45
											vTAGSPITAVENIEEYFPLPDR	1		N-Term(iTRAQ4plex)				5.26	3	854.779	2562.32	0.16	71.91
											fYkEDTHIR	1		N-Term(iTRAQ4plex); K3(iTRAQ4plex)	0.842	0.982	1.04	3.38	3	499.608	1496.81	0.55	23.53
											aIEILDEEVDIPQSQVVNVPVIGk	4		N-Term(iTRAQ4plex); K24(iTRAQ4plex)	1.396	1.016	1.573	4.74	3	964.881	2892.63	3.5	60.42
O34520	hisG	ATP phosphoribosyltransferase OS	9.86	1	2	2	3	0.97	2.648	4.472			O34520
											fIVNPVSYR	2		N-Term(iTRAQ4plex)	1.323	4.004	6.717	3.07	2	619.855	1238.7	1.43	42.43
											kLIIDVPEENLR	1		N-Term(iTRAQ4plex); K1(iTRAQ4plex)	0.601	0.886	1.528	4.32	3	576.349	1727.03	1.7	41.68
P37958	mecA	Adapter protein MecA 1 OS	15.6	1	3	3	4	1.08	1.064	1.637			P37958
											gFDREEIWYNR	2		N-Term(iTRAQ4plex)	1.156	1.093	2.446	5	3	543.604	1628.8	2.01	36.69
											lIISEHALETIk	1		N-Term(iTRAQ4plex); K12(iTRAQ4plex)	0.968	0.938	1.171	3.21	3	552.337	1655	-0.35	43.68
											fYMSYGDIEDR	1		N-Term(iTRAQ4plex)	1.128	1.231	1.562	4.24	2	770.349	1539.69	0.12	41.06
P39577	dltE	Uncharacterized oxidoreductase DltE OS	9.92	1	2	2	2	1.924	1.452	1.597			P39577
											qQLPNIHTk	1		N-Term(iTRAQ4plex); K9(iTRAQ4plex)	1.197	1.16	1.094	5.22	3	456.274	1366.81	1.84	22.93
											gISSEEYVQYFLDGLk	1		N-Term(iTRAQ4plex); K16(iTRAQ4plex)	2.65	1.745	2.1	4.27	3	712.712	2136.12	5.33	66
O08336	cypE	Probable bifunctional P-450/NADPH-P450 reductase 2 OS	5.79	1	5	5	5	1.309	1.069	1.458			O08336
											gQPVTVLIPk	1		N-Term(iTRAQ4plex); K10(iTRAQ4plex)	1.457	1.254	2.086	3.44	2	670.431	1339.85	-1.03	36.93
											dSQHPFITSMLR	1		N-Term(iTRAQ4plex)	1.034	0.811	0.833	3.32	3	525.94	1575.81	-0.19	41.03
											sWASTYQR	1		N-Term(iTRAQ4plex)	1.441	1.205	1.536	2.37	2	571.788	1142.57	-2.25	26.1
											gYHSMMLDIATQLIQk	1		N-Term(iTRAQ4plex); K16(iTRAQ4plex)	1.104	0.546	1.099	4.62	3	713.052	2137.14	1.47	60.49
											lNPNEEIDVADDMTR	1		N-Term(iTRAQ4plex)	1.507	1.527	1.738	5.37	2	938.448	1875.89	0.75	41.19
O31629	yjcG	UPF0477 protein YjcG OS	71.35	1	10	10	28	1.149	1.532	2.284			O31629
											aDQLVSHLR	2		N-Term(iTRAQ4plex)	1.162	1.676	2.122	4.24	3	394.896	1182.67	1.29	28.89
											yDPSYSLIPPHLTLR	11		N-Term(iTRAQ4plex)	1.162	1.294	2.766	4.98	3	639.351	1916.04	-0.81	49.95
											yGIVLFPSkk	1		N-Term(iTRAQ4plex); K9(iTRAQ4plex); K10(iTRAQ4plex)	1.085	1.919	3.009	3.38	2	792.498	1583.99	0.1	42.27
											lYTGVLAGEQEYNFVPHVTVGQNLSDDEHSDVLGQLk	1		N-Term(iTRAQ4plex); K37(iTRAQ4plex)		1.016	1.611	4.75	4	1090.81	4360.22	4.3	59.36
											aEPTEELk	2		N-Term(iTRAQ4plex); K8(iTRAQ4plex)	1.273	1.612	2.757	3.49	2	602.836	1204.67	-0.97	19.68
											yGIVLFPSk	3		N-Term(iTRAQ4plex); K9(iTRAQ4plex)	1.231	1.931	2.667	3.48	2	656.399	1311.79	-0.43	46.53
											ySSFAPVNNVIYIk	4		N-Term(iTRAQ4plex); K14(iTRAQ4plex)	1.354	2.204	2.529	5.11	2	952.035	1903.06	2.77	48.78
											mQEVSHEEIVDR	2		N-Term(iTRAQ4plex)	1.028	1.28	1.828	4.8	3	539.268	1615.79	2.39	25.86
											kLQDLANSYR	1		N-Term(iTRAQ4plex); K1(iTRAQ4plex)	0.988	1.308	1.677	3.79	3	499.288	1495.85	1.17	31.94
											eSHPLVLk	1		N-Term(iTRAQ4plex); K8(iTRAQ4plex)	1.096	1.567	2.832	3.01	3	404.252	1210.74	0.18	23.64
P71088	spo0M	Sporulation-control protein spo0M OS	37.21	1	10	10	46	1.231	1.003	1.606			P71088
											yVIVkDDEEHR	2		N-Term(iTRAQ4plex); K5(iTRAQ4plex)	1.474	0.984	1.778	4.87	4	423.48	1690.9	-0.65	24.7
											gWLEEMYNDGEQLVR	7		N-Term(iTRAQ4plex)	1.042	0.857	2.197	5.78	3	661.654	1982.95	4.52	62.78
											kLAASAGIGAAk	3		N-Term(iTRAQ4plex); K1(iTRAQ4plex); K12(iTRAQ4plex)	1.328	1.641	2.272	6.43	3	497.32	1489.95	2.24	22.97
											yATIHSFR	3		N-Term(iTRAQ4plex)	1.189	1.012	1.436	3.28	3	380.21	1138.62	2.66	28.27
											vDTILEk	2		N-Term(iTRAQ4plex); K7(iTRAQ4plex)	1.337	1.13	1.208	3.11	2	553.337	1105.67	-3	30.87
											lAASAGIGAAk	3		N-Term(iTRAQ4plex); K11(iTRAQ4plex)	1.386	1.519	2.062	4.83	2	609.373	1217.74	-5.01	24.95
											lPFVQEFEFVPTSGYYR	4		N-Term(iTRAQ4plex)	1.153	0.93	1.836	4.82	2	1112.07	2223.14	6.47	68.53
											rLPFVQEFEFVPTSGYYR	14		N-Term(iTRAQ4plex)	1.552	1.153	3.383	5.84	3	793.746	2379.22	-0.49	60.11
											yIDLQLSTR	3		N-Term(iTRAQ4plex)	1.402	0.922	1.862	3.26	2	626.855	1252.7	1	40.93
											dAYFPGEEVQGTVHVk	5		N-Term(iTRAQ4plex); K16(iTRAQ4plex)	1.268	1.002	2.28	7.47	3	688.693	2064.06	0.08	36.52
O07609	yhfK	Uncharacterized sugar epimerase YhfK OS	69.16	1	10	10	26	1.207	1.497	2.229			O07609
											nEPGTGTVSAAk	5		N-Term(iTRAQ4plex); K12(iTRAQ4plex)	1.324	2.035	2.579	3.77	2	710.388	1419.77	-0.08	18.34
											tVIASLDEk	1		N-Term(iTRAQ4plex); K9(iTRAQ4plex)	1.177	1.252	1.583	4.05	2	632.374	1263.74	0.8	33.75
											aFDLTEGDTPIAEALk	6		N-Term(iTRAQ4plex); K16(iTRAQ4plex)	1.36	1.612	2.891	6.04	2	990.036	1979.06	3.29	50.43
											iLEASGLTYTIIRPGGLR	3		N-Term(iTRAQ4plex)	1.28	1.895	2.486	3.97	3	692.076	2074.21	-0.63	53.19
											eNWNEALkPYYVAk	3		N-Term(iTRAQ4plex); K8(iTRAQ4plex); K14(iTRAQ4plex)	1.311	1.436	2.788	4.78	3	719.726	2157.16	-2.82	42.31
											lVSLFQDNPDHSIR	2		N-Term(iTRAQ4plex)	0.935	1.305	1.576	3.22	2	892.978	1784.95	3.89	44.11
											aSLEAAGAEAVLANLEGSPEEIAAAAk	1		N-Term(iTRAQ4plex); K27(iTRAQ4plex)				3.53	3	947.846	2841.52	5.19	65.18
											tLLVDLDGAAk	1		N-Term(iTRAQ4plex); K11(iTRAQ4plex)	1.074	1.25	1.313	4.41	2	702.421	1403.83	-0.07	40.47
											mkVFLIGANGQIGQR	1		N-Term(iTRAQ4plex); K2(iTRAQ4plex)	0.946	0.895	1.685	5.96	3	640.709	1920.11	1.75	44.58
											fIMVSALQAHNR	3		N-Term(iTRAQ4plex)	1.119	1.478	1.988	7.12	3	510.95	1530.84	1.32	42.64
P49814	mdh	Malate dehydrogenase OS	56.73	1	12	12	71	1.182	2.176	3.059			P49814
											sVTQEIVk	7		N-Term(iTRAQ4plex); K8(iTRAQ4plex)	1.086	1.746	2.037	3.84	2	596.363	1191.72	-0.67	26.68
											ySYAGGIPLETLIPk	16		N-Term(iTRAQ4plex); K15(iTRAQ4plex)	1.218	1.391	2.128	4.14	3	637.368	1910.09	1.52	49.86
											aLDMLEASPVQGFDAk	7		N-Term(iTRAQ4plex); K16(iTRAQ4plex)	1.505	3.028	5.013	5.37	3	660.684	1980.04	0.56	48.47
											iTGTSNYEDTAGSDIVVITAGIAR	5		N-Term(iTRAQ4plex)	1.053	1.731	1.349	8.05	3	856.784	2568.34	4.32	54.06
											kVSVIGAGFTGATTAFLIAQk	2		N-Term(iTRAQ4plex); K1(iTRAQ4plex); K21(iTRAQ4plex)				6.53	3	838.168	2512.49	0.96	57.04
											vSVIGAGFTGATTAFLIAQk	4		N-Term(iTRAQ4plex); K20(iTRAQ4plex)	1.169	2.282	4.276	7.18	3	747.437	2240.3	2.85	62.36
											vIGQSGVLDTAR	11		N-Term(iTRAQ4plex)	1.313	3.123	3.717	4.65	2	680.389	1359.77	-0.19	30.53
											tFVAEELNLSVk	3		N-Term(iTRAQ4plex); K12(iTRAQ4plex)	1.294	2.823	3.483	5.48	2	819.474	1637.94	3.91	48.48
											ySPDSIIVVLTNPVDAMTYAVYk	4		N-Term(iTRAQ4plex); K23(iTRAQ4plex)	0.565	0.911	1.555	6.84	3	949.847	2847.53	6.51	79.45
											dDLVSTNEk	1		N-Term(iTRAQ4plex); K9(iTRAQ4plex)	1.412	2.483	3.824	3.34	2	654.849	1308.69	1.27	21.81
											dVTGFVLGGHGDDMVPLVR	4		N-Term(iTRAQ4plex)	1.243	2.169	4.013	7.75	3	710.04	2128.11	3.36	52.61
											eLADVVLVDIPQLENPTk	7		N-Term(iTRAQ4plex); K18(iTRAQ4plex)	1.076	2.154	3.744	5.32	3	761.103	2281.3	2.8	60.08
P52035	bsaA	Glutathione peroxidase homolog BsaA OS	5	1	1	1	1	1.085	1.554	2.251			P52035
											eLEDDIVk	1		N-Term(iTRAQ4plex); K8(iTRAQ4plex)	1.085	1.554	2.251	3.51	2	624.85	1248.69	-0.13	29.41
P37542	yabA	Initiation-control protein YabA OS	36.13	1	3	3	5	1.448	1.594	2.145			P37542
											tEQTDIGEGYDNLAR	1		N-Term(iTRAQ4plex)	0.832	1.124	1.05	5.27	2	913.438	1825.87	-0.37	31.57
											lDDTTQQIEk	2		N-Term(iTRAQ4plex); K10(iTRAQ4plex)	1.077	1.386	1.647	5.11	2	739.9	1478.79	-1.23	25.24
											qHIGEMIEENHHLQLENk	2		N-Term(iTRAQ4plex); K18(iTRAQ4plex)	1.664	1.801	2.457	4	3	829.757	2487.26	-3.33	31.69
O34305	ytoQ	Uncharacterized protein YtoQ OS	39.19	1	5	5	12	1.208	1.256	1.786			O34305
											sLkLPITFVGPMENHDR	2		N-Term(iTRAQ4plex); K3(iTRAQ4plex)	0.944	1.187	1.363	6.29	3	748.081	2242.23	1.78	47.53
											aDFVIALFGEk	2		N-Term(iTRAQ4plex); K11(iTRAQ4plex)	1.344	1.583	1.763	4.24	2	749.434	1497.86	3.61	64.27
											gkPLIIIRPESLHHPLk	1		N-Term(iTRAQ4plex); K2(iTRAQ4plex); K17(iTRAQ4plex)	1.427	1.119	1.883	3.62	6	397.589	2380.5	2.9	34.79
											aNITVETVNQAIk	6		N-Term(iTRAQ4plex); K13(iTRAQ4plex)	1.175	1.2	1.78	5.46	2	844.993	1688.98	-0.14	35.24
											lPITFVGPMENHDR	1		N-Term(iTRAQ4plex)	1.224	1.154	1.2	6.35	3	590.642	1769.91	-0.39	44.8
O31605	yjbG	Oligoendopeptidase F homolog OS	29.4	1	21	21	52	1.598	1.552	1.911			O31605
											lYILNHMLEGFR	4		N-Term(iTRAQ4plex)	1.607	1.688	1.538	4.79	2	825.451	1649.9	-0.16	62.82
											lADSADHLYEALTYQDk	1		N-Term(iTRAQ4plex); K17(iTRAQ4plex)	1.972	1.829	2.082	5.79	2	1121.07	2241.14	3.57	47.48
											aQEGEPLTPELLTNVYYDLNkk	1		N-Term(iTRAQ4plex); K21(iTRAQ4plex); K22(iTRAQ4plex)	1.72	1.891	2.487	7.9	3	989.878	2967.62	5.26	61.22
											kVLELDEVHIYDLYTPLVk	1		N-Term(iTRAQ4plex); K1(iTRAQ4plex); K19(iTRAQ4plex)	1.195	1.082	1.845	5.55	4	680.65	2719.58	5.45	56.22
											vTYEEAkDYMLk	3		N-Term(iTRAQ4plex); K7(iTRAQ4plex); K12(iTRAQ4plex)	1.436	1.479	2.377	4.64	2	961.516	1922.02	-3.1	41.05
											eLIPNLSk	5		N-Term(iTRAQ4plex); K8(iTRAQ4plex)	1.784	1.448	2.587	3.1	2	601.372	1201.74	-1.67	37.58
											vTYEEAk	3		N-Term(iTRAQ4plex); K7(iTRAQ4plex)	1.582	1.418	1.654	2.96	2	564.312	1127.62	-1.71	19.61
											aGSSQYPIDVLk	6		N-Term(iTRAQ4plex); K12(iTRAQ4plex)	1.774	1.408	1.658	5.17	2	783.441	1565.88	-1.74	36.9
											kNAFDAVYk	2		N-Term(iTRAQ4plex); K1(iTRAQ4plex); K9(iTRAQ4plex)	1.312	1.461	1.956	5.02	3	496.624	1487.86	-0.62	27.55
											qITHGNFINFLESENR	5		N-Term(iTRAQ4plex)	1.49	1.728	1.971	6.18	3	688.354	2063.05	2.56	48.73
											gLAPLGEEYASILk	3		N-Term(iTRAQ4plex); K14(iTRAQ4plex)	1.948	1.644	2.797	5.95	2	875.007	1749.01	1.67	54.13
											aQEGEPLTPELLTNVYYDLNk	1		N-Term(iTRAQ4plex); K21(iTRAQ4plex)	1.019	0.948	1.063	4.88	3	899.145	2695.42	4.48	62.45
											lYTYAHMR	3		N-Term(iTRAQ4plex)	1.815	1.862	2.145	3.86	3	400.211	1198.62	1.17	30.3
											lEDIFPSDEAWNk	2		N-Term(iTRAQ4plex); K13(iTRAQ4plex)	1.639	1.676	1.787	5.04	3	617.984	1851.94	0.38	48.4
											vLELDEVHIYDLYTPLVk	3		N-Term(iTRAQ4plex); K18(iTRAQ4plex)	1.812	1.597	1.883	6.81	3	816.464	2447.38	3.99	59.86
											lYSHAIEEITk	2		N-Term(iTRAQ4plex); K11(iTRAQ4plex)	1.665	1.727	1.839	5.21	2	796.449	1591.89	-2.1	35.73
											aGSSQYPIDVLkk	1		N-Term(iTRAQ4plex); K12(iTRAQ4plex); K13(iTRAQ4plex)	1.789	1.577	2.22	5.36	3	613.363	1838.08	0.17	35.82
											lDEMEELLMk	2		N-Term(iTRAQ4plex); K10(iTRAQ4plex)	1.926	1.696	1.839	4.56	2	769.908	1538.81	3.07	53.77
											mFEEkLDEMEELLMk	2		N-Term(iTRAQ4plex); K5(iTRAQ4plex); K15(iTRAQ4plex)	1.855	2.102	1.942	5.83	3	783.075	2347.21	6.15	68.22
											wVDVYENk	1		N-Term(iTRAQ4plex); K8(iTRAQ4plex)	1.422	1.301	1.469	2.98	2	670.857	1340.71	-0.9	39.66
											nAFDAVYk	1		N-Term(iTRAQ4plex); K8(iTRAQ4plex)	1.41	1.489	2.135	2.62	2	608.335	1215.66	1.68	32.32
O34812	yfmJ	Putative NADP-dependent oxidoreductase YfmJ OS	26.55	1	8	8	15	1.37	1.568	2.273			O34812
											vVGIAGSDEkIDYLk	1		N-Term(iTRAQ4plex); K10(iTRAQ4plex); K15(iTRAQ4plex)	0.87	1.179	1.649	5.23	3	680.397	2039.18	0.52	40.06
											vVGIAGSDEk	1		N-Term(iTRAQ4plex); K10(iTRAQ4plex)	1.158	1.589	2.156	4.07	2	631.863	1262.72	-0.93	23.17
											qLAEWLk	3		N-Term(iTRAQ4plex); K7(iTRAQ4plex)	1.008	1.439	1.851	2.82	2	588.354	1175.7	-0.84	40.78
											rPQGIPVHEDFR	3		N-Term(iTRAQ4plex)	0.413	1.122	1.794	4.48	3	532.289	1594.85	-2.46	26.55
											sYVEPFALDk	1		N-Term(iTRAQ4plex); K10(iTRAQ4plex)	1.596	2.293	4.488	4.27	2	728.9	1456.79	0.09	42.37
											mTASQQQIQLAR	2		N-Term(iTRAQ4plex)	1.656	1.315	1.274	4.62	2	759.913	1518.82	1.03	29.24
											kGDIVIGNLSWQEFSAVSESALR	2		N-Term(iTRAQ4plex); K1(iTRAQ4plex)	1.269	2.103	2.239	8.45	3	932.175	2794.51	4.48	63.27
											tLYVSVDPYMR	2		N-Term(iTRAQ4plex)	1.129	2.129	3.007	3.75	2	744.391	1487.77	4	45.64
P54464	yqeY	Uncharacterized protein YqeY OS	67.57	1	11	11	44	0.966	1.342	2.124			P54464
											aSLQNEAIk	7		N-Term(iTRAQ4plex); K9(iTRAQ4plex)	1.113	1.432	2.806	4.75	2	631.371	1261.74	-0.14	22.9
											lDLVDk	2		N-Term(iTRAQ4plex); K6(iTRAQ4plex)	0.848	1.228	1.641	2.65	2	495.806	990.605	-2.02	30.89
											eLDILEVYLPEQLSEEELR	6		N-Term(iTRAQ4plex)	0.916	1.222	2.094	4.66	2	1231.15	2461.3	6.7	69.36
											lNQDMk	1		N-Term(iTRAQ4plex); K6(iTRAQ4plex)	0.906	1.18	1.467	2.53	2	518.788	1036.57	-0.92	19.82
											aDGSLINk	7		N-Term(iTRAQ4plex); K8(iTRAQ4plex)	0.926	1.45	2.361	3.75	2	553.327	1105.65	1.75	21.46
											kDSLTEDEELTVLSR	1		N-Term(iTRAQ4plex); K1(iTRAQ4plex)	0.933	1.115	1.142	6.02	3	675.032	2023.08	1.24	35.05
											dSLTEDEELTVLSR	5		N-Term(iTRAQ4plex)	0.995	1.47	2.711	5.69	2	875.945	1750.88	-0.37	45.69
											kDSLQEFSNANR	2		N-Term(iTRAQ4plex); K1(iTRAQ4plex)	0.837	1.538	1.712	4.42	2	848.947	1696.89	0.69	23.89
											vMGAIMPk	4		N-Term(iTRAQ4plex); K8(iTRAQ4plex)	1.016	1.838	2.498	3.37	2	567.836	1134.66	2.37	33.49
											tIVNETIAEVGASSk	7		N-Term(iTRAQ4plex); K15(iTRAQ4plex)	1.015	1.789	2.26	6.07	2	904.005	1807	-0.95	43.42
											gkADGSLINk	2		N-Term(iTRAQ4plex); K2(iTRAQ4plex); K10(iTRAQ4plex)	1.093	1.209	2.757	4.18	3	478.959	1434.86	-1.04	20.6
O31642	yjdA	Uncharacterized oxidoreductase YjdA OS	3.19	1	1	1	2	0.995	0.984	1.628			O31642
											gAISAFTR	2		N-Term(iTRAQ4plex)	1.019	1.018	1.814	2.86	2	483.777	966.546	-2.65	29.76
P94388	cah	Cephalosporin-C deacetylase OS	10.06	1	2	2	2	1.045	1.201	1.797			P94388
											mQLFDLPLDQLQTYkPEk	1		N-Term(iTRAQ4plex); K15(iTRAQ4plex); K18(iTRAQ4plex)	0.896	1.153	1.418	5.59	4	660.619	2639.46	2.94	59.81
											aAVADYPYLSNFER	1		N-Term(iTRAQ4plex)	1.194	1.249	2.177	4.62	2	880.445	1759.88	3.55	48.64
O31777	kbl	8-amino-7-oxononanoate synthase 1 OS	10.2	1	3	3	4	0.914	2.326	4.098			O31777
											lWENTAYFk	2		N-Term(iTRAQ4plex); K9(iTRAQ4plex)	0.8	1.712	2.028	2.78	2	730.399	1459.79	5.02	45.06
											gVFAQSIVFPTVAk	1		N-Term(iTRAQ4plex); K14(iTRAQ4plex)	1.64	4.089	9.381	3.45	2	876.517	1752.03	-1.49	51.33
											vIQLSSNNYLGFTSHPR	1		N-Term(iTRAQ4plex)	0.418	1.775	3.002	5.01	3	693.039	2077.1	3.09	45.94
P45913	yqaP	Uncharacterized protein YqaP OS	41.1	1	14	14	28	1.006	0.964	1.545			P45913
											sLDAINELSk	1		N-Term(iTRAQ4plex); K10(iTRAQ4plex)	0.985	0.975	1.66	4.46	2	689.395	1377.78	-0.03	34.04
											nLLDNYNk	1		N-Term(iTRAQ4plex); K8(iTRAQ4plex)	0.831	0.802	1.18	3.18	2	641.346	1281.68	-15.42	28.02
											lGFLDDDIER	2		N-Term(iTRAQ4plex)	1.025	1.047	1.489	4.12	2	668.849	1336.69	2.65	43.8
											fkDLGSIYYSR	3		N-Term(iTRAQ4plex); K2(iTRAQ4plex)	0.958	0.985	1.883	4.49	3	546.303	1636.89	0.06	38.71
											qIGVSVSHVPHSNRk	1		N-Term(iTRAQ4plex); K15(iTRAQ4plex)	1.241	0.92	2.193	3.54	4	484.031	1933.1	2.09	21.85
											tVLNLQk	3		N-Term(iTRAQ4plex); K7(iTRAQ4plex)	0.994	1.131	1.698	3.52	2	552.353	1103.7	-3.43	28.87
											nVTEGANYSTESIGHIk	2		N-Term(iTRAQ4plex); K17(iTRAQ4plex)	0.842	0.768	1.063	3.36	3	703.364	2108.08	-3.64	30.83
											aLLDGIEk	1		N-Term(iTRAQ4plex); K8(iTRAQ4plex)	0.987	1.018	1.64	3.43	2	573.851	1146.69	-2.21	35.23
											lPQYNSLEELEk	2		N-Term(iTRAQ4plex); K12(iTRAQ4plex)	1.036	0.928	1.889	5.01	2	875.977	1750.95	0	45.07
											nLEEPQQLLETLADNLPEQE	1		N-Term(iTRAQ4plex)				2.7	3	823.083	2467.24	1.54	73.92
											dLGSIYYSR	3		N-Term(iTRAQ4plex)	1.001	0.911	1.568	3.5	2	609.319	1217.63	2.76	34.11
											lALQNEQLk	3		N-Term(iTRAQ4plex); K9(iTRAQ4plex)	0.92	1.072	1.35	4.13	2	672.907	1344.81	-1.87	31.26
											qIGVSVSHVPHSNR	4		N-Term(iTRAQ4plex)	1.15	1.032	1.829	5.34	4	415.981	1660.9	0.9	23.1
											kTVLNLQk	1		N-Term(iTRAQ4plex); K1(iTRAQ4plex); K8(iTRAQ4plex)	1.052	0.934	1.614	4.14	3	459.305	1375.9	-0.49	26.67
O07621	hemAT	Heme-based aerotactic transducer HemAT OS	8.56	1	3	3	3	0.623	0.715	1.453			O07621
											aGTVTSSTVEEk	1		N-Term(iTRAQ4plex); K12(iTRAQ4plex)	0.566	0.679	1.69	5.16	2	748.906	1496.81	0.53	19.51
											sVQELVDk	1		N-Term(iTRAQ4plex); K8(iTRAQ4plex)	0.7	0.713	1.158	3.86	2	603.351	1205.69	-2.6	29.4
											iQETSGSIANLFSETSR	1		N-Term(iTRAQ4plex)	0.66	0.791	1.278	4.4	2	992.513	1984.02	4.06	51.61
O34912	hisI	Histidine biosynthesis bifunctional protein HisIE OS	4.31	1	1	1	1	1	2.096	3.113			O34912
											fGIMNELER	1		N-Term(iTRAQ4plex)	1	2.096	3.113	4.18	2	626.828	1252.65	1.61	46.88
O34693	yloA	Uncharacterized protein YloA OS	10.31	1	5	5	6	1.28	0.907	1.202			O34693
											rFDSLSELLDR	1		N-Term(iTRAQ4plex)	1.041	0.981	1.093	5.23	3	498.941	1494.81	3.44	48.37
											iSPLEASEDDILR	1		N-Term(iTRAQ4plex)	1.263	0.996	1.075	3.77	2	801.429	1601.85	0.1	44.14
											kHIEGGFIEk	1		N-Term(iTRAQ4plex); K1(iTRAQ4plex); K10(iTRAQ4plex)	1.44	0.755	1.232	3.96	3	530.65	1589.94	-1.53	24.71
											qIVDHFSGVSPLFAk	2		N-Term(iTRAQ4plex); K15(iTRAQ4plex)	1.391	0.776	1.155	6.91	3	645.031	1933.08	0.68	46.17
											dIPGSHVVIR	1		N-Term(iTRAQ4plex)	1.513	0.927	1.646	4.38	3	412.911	1236.72	-0.24	27.61
Q08429	kapB	Kinase-associated lipoprotein B OS	42.97	1	3	3	11	0.972	1.04	1.553			Q08429
											aVLTHPAQGDLHHPk	6		N-Term(iTRAQ4plex); K15(iTRAQ4plex)	1.094	0.886	1.591	6.48	3	637.026	1909.06	-0.07	19.92
											sLHNLDILEk	4		N-Term(iTRAQ4plex); K10(iTRAQ4plex)	1.087	0.883	1.504	4.01	3	490.622	1469.85	-3.14	35.83
											aLAYGEQTNIPHHMVkPYDGEVPDYTESLR	1		N-Term(iTRAQ4plex); K16(iTRAQ4plex)	0.626	1.137	1.265	6.74	4	930.467	3718.84	0.78	42.49
Q07428	nrgB	Nitrogen regulatory PII-like protein OS	9.48	1	1	1	1	0.879	1.211	1.881			Q07428
											vPVDQVTETAk	1		N-Term(iTRAQ4plex); K11(iTRAQ4plex)	0.879	1.211	1.881	3.51	2	737.922	1474.84	0.36	26.27
P54466	yqfA	UPF0365 protein YqfA OS	66.77	1	18	18	61	0.951	1.296	2.068			P54466
											dVLEAVQMSVNPk	2		N-Term(iTRAQ4plex); K13(iTRAQ4plex)	0.821	1.127	2.027	5.4	2	859.475	1717.94	1.7	43.79
											aGLNVGTNQLESHYLAGGNVDR	13		N-Term(iTRAQ4plex)	0.932	1.682	2.378	8.8	3	810.416	2429.23	1.45	38.73
											aNIELTFER	2		N-Term(iTRAQ4plex)	0.794	1.012	2.018	3.71	2	618.839	1236.67	0.15	39.01
											vVNPLIk	3		N-Term(iTRAQ4plex); K7(iTRAQ4plex)	0.941	1.325	2.139	3.04	2	535.862	1070.72	-1.52	32.56
											kVLENPDMISQTVLGk	1		N-Term(iTRAQ4plex); K1(iTRAQ4plex); K16(iTRAQ4plex)	0.953	1.406	1.789	5.48	3	735.429	2204.27	1.22	42.86
											vIETPFIAGVAMDGIEVk	2		N-Term(iTRAQ4plex); K18(iTRAQ4plex)	0.694	1.152	1.854	4.4	2	1089.12	2177.22	4.86	59.02
											gLDSGTAFEILSIDIADVDIGk	2		N-Term(iTRAQ4plex); K22(iTRAQ4plex)	0.545	0.645	1.016	5.28	3	846.462	2537.37	4.81	75.58
											nIDADTEMR	3		N-Term(iTRAQ4plex)	0.905	1.41	1.793	3.45	2	604.789	1208.57	0.65	22.57
											vGEGIVSTIGSSDNHk	1		N-Term(iTRAQ4plex); K16(iTRAQ4plex)	1.021	0.9	1.525	6.84	3	630.004	1888	-2.48	30.59
											aMAVAQEQEMR	5		N-Term(iTRAQ4plex)	0.893	1.128	2.18	4.58	2	704.345	1407.68	-1.24	25.66
											lVGGAGEETIVAR	3		N-Term(iTRAQ4plex)	0.825	1.433	1.722	5.08	2	708.402	1415.8	-0.6	32.19
											eGNIGVMDYMNIk	4		N-Term(iTRAQ4plex); K13(iTRAQ4plex)	0.895	1.219	1.833	6.08	2	886.453	1771.9	1.79	44.31
											vLENPDMISQTVLGk	5		N-Term(iTRAQ4plex); K15(iTRAQ4plex)	0.846	1.33	1.815	6.45	2	966.542	1932.08	2.51	47.65
											lTkDPSDEDR	2		N-Term(iTRAQ4plex); K3(iTRAQ4plex)	0.989	1.297	2.074	3.71	2	732.382	1463.76	-0.8	14.92
											amAVAQEQEMR	2		N-Term(iTRAQ4plex); M2(Oxidation)	0.926	1.622	2.48	3.91	2	712.343	1423.68	0.12	19.13
											vVNALIAAQR	2		N-Term(iTRAQ4plex)	0.886	1.482	1.698	3.94	2	599.872	1198.74	-2.19	38.28
											vGEGIVSTIGSSDNHkk	2		N-Term(iTRAQ4plex); K16(iTRAQ4plex); K17(iTRAQ4plex)	1.031	1.205	2.591	5.95	3	720.74	2160.21	3.19	30.53
											aMAVAQEQEmR	1		N-Term(iTRAQ4plex); M10(Oxidation)	1.027	1.976	2.931	2.62	2	712.343	1423.68	-0.83	19.1
											nIGAILQTDQAEADk	2		N-Term(iTRAQ4plex); K15(iTRAQ4plex)	0.837	1.29	1.219	4.57	2	938.01	1875.01	3.4	37.63
											vVEAEAEVPLAMAEALR	4		N-Term(iTRAQ4plex)	0.876	1.325	2.103	5.73	2	971.527	1942.05	1.73	58.71
P80240	greA	Transcription elongation factor GreA OS	78.98	1	11	11	46	1.104	1.244	1.7			P80240
											qkLEQELEYLk	4		N-Term(iTRAQ4plex); K2(iTRAQ4plex); K11(iTRAQ4plex)	1.267	1.431	2.343	6.33	3	618.363	1853.08	0.65	43.3
											iIEDDGGSNVVGLGk	6		N-Term(iTRAQ4plex); K15(iTRAQ4plex)	1.282	1.436	2.256	6.94	2	880.987	1760.97	1.79	34.21
											vDEEVTVQTPGGEMLVk	2		N-Term(iTRAQ4plex); K17(iTRAQ4plex)	1.087	1.293	1.709	5.02	2	1060.06	2119.12	0.27	40.46
											kVDEEVTVQTPGGEmLVk	1		N-Term(iTRAQ4plex); K1(iTRAQ4plex); M15(Oxidation); K18(iTRAQ4plex)	1.261	0.815	1.123	4.57	3	803.107	2407.31	-1.59	33.94
											eEQAFVEGR	2		N-Term(iTRAQ4plex)	0.977	1.11	1.516	3.82	2	604.804	1208.6	-1.32	24.95
											kVDEEVTVQTPGGEMLVk	3		N-Term(iTRAQ4plex); K1(iTRAQ4plex); K18(iTRAQ4plex)				7.42	4	598.585	2391.32	0.38	38.27
											lEQELEYLk	1		N-Term(iTRAQ4plex); K9(iTRAQ4plex)	1.068	1.221	1.513	4.42	2	726.915	1452.82	2.3	44.62
											sFGDLSENSEYDSAkEEQAFVEGR	4		N-Term(iTRAQ4plex); K15(iTRAQ4plex)				6.78	4	746.352	2982.39	0.9	42.74
											iSNDSPIAk	8		N-Term(iTRAQ4plex); K9(iTRAQ4plex)	1.172	1.3	1.937	4.27	2	616.858	1232.71	-0.59	25.4
											vFPMTAEGk	4		N-Term(iTRAQ4plex); K9(iTRAQ4plex)	1.218	1.449	2.287	3.3	2	634.353	1267.7	1.78	33.64
											vTTLENMIR	6		N-Term(iTRAQ4plex)	1.163	1.432	1.699	4.08	2	610.844	1220.68	1.32	42.4
											tVTFVELPDGDEESYTIVGSAEADPFEGk	5		N-Term(iTRAQ4plex); K29(iTRAQ4plex)	1.208	1.492	2.99	5.27	3	1130.89	3390.65	3.37	58.24
P39070	clpQ	ATP-dependent protease subunit ClpQ OS	21.55	1	4	4	9	1.13	1.079	1.611			P39070
											sAMSGDGQVTFGQAVVMk	1		N-Term(iTRAQ4plex); K18(iTRAQ4plex)	1.687	0.935	1.355	3.25	3	701.027	2101.07	0.04	41.88
											kHAGESMSASEIAR	1		N-Term(iTRAQ4plex); K1(iTRAQ4plex)	0.851	1.217	1.51	4.55	3	587.979	1761.92	3.24	19.18
											aAVELAk	1		N-Term(iTRAQ4plex); K7(iTRAQ4plex)	0.881	0.794	1.081	2.61	2	495.314	989.621	-2.52	24.35
											hAGESMSASEIAR	6		N-Term(iTRAQ4plex)	1.135	1.222	2.115	5.24	3	497.246	1489.72	2.63	21.67
P96608	ydbM	Putative acyl-CoA dehydrogenase YdbM OS	7.09	1	2	2	3	1.063	0.802	1.274			P96608
											rPHLTSELGAAk	1		N-Term(iTRAQ4plex); K12(iTRAQ4plex)	0.992	0.629	1.192	3.29	3	523.313	1567.93	6.01	22.67
											aGLHNPPMDDAVIHk	2		N-Term(iTRAQ4plex); K15(iTRAQ4plex)	0.979	0.794	1.233	6.24	3	635.011	1903.02	5.24	30.15
O34798	yjeA	Uncharacterized protein YjeA OS	1.93	1	1	1	1	1.206	0.789	1.075			O34798
											tILIHDIYR	1		N-Term(iTRAQ4plex)	1.206	0.789	1.075	3.21	3	429.924	1287.76	3.21	37.23
P54568	yqkE	Uncharacterized protein YqkE OS	22.97	1	1	1	1	0.978	1.09	1.64			P54568
											sFEELLNESQMDWHQYk	1		N-Term(iTRAQ4plex); K17(iTRAQ4plex)	0.978	1.09	1.64	7.03	3	824.732	2472.18	2.31	57.96
P49852	hmp	Flavohemoprotein OS	8.27	1	2	2	3	1.224	0.726	0.982			P49852
											aGDLHFHEGQIDQQFLk	2		N-Term(iTRAQ4plex); K17(iTRAQ4plex)	1.041	0.732	1.047	4.84	3	757.728	2271.17	-2.49	39.45
											sTVPVLQQHGETITGR	1		N-Term(iTRAQ4plex)	1.561	0.74	0.869	5.6	3	623.01	1867.01	-0.48	30.74
O31534	hmoA	Heme-degrading monooxygenase HmoA OS	43.52	1	4	4	13	1.066	0.997	1.576			O31534
											wESEDHWk	2		N-Term(iTRAQ4plex); K8(iTRAQ4plex)	1.286	1.116	1.673	3.99	3	468.897	1404.68	-1.31	30.04
											rGDEEVVVMIR	3		N-Term(iTRAQ4plex)	1.143	0.989	0.753	4.75	3	482.934	1446.79	2.27	32.09
											gkPkPDYLISTEVSMYHVR	6		N-Term(iTRAQ4plex); K2(iTRAQ4plex); K4(iTRAQ4plex)	1.154	0.772	1.288	7.07	5	531.297	2652.46	1.47	40.39
											fSAEGIIEk	2		N-Term(iTRAQ4plex); K9(iTRAQ4plex)	1.257	1.26	1.323	3.81	2	641.369	1281.73	1.41	37.59
O34334	yjoA	Uncharacterized protein YjoA OS	74.03	1	13	13	34	1.234	1.36	1.899			O34334
											gNLFVYVR	6		N-Term(iTRAQ4plex)	1.316	1.396	3.179	3.5	2	556.322	1111.64	-1.73	43.03
											eMGHTELPFYQQR	7		N-Term(iTRAQ4plex)	1.197	1.304	1.507	5.22	3	593.958	1779.86	-0.8	36.07
											aLLQLAMEHEIHHk	2		N-Term(iTRAQ4plex); K14(iTRAQ4plex)	1.417	1.389	1.721	8.21	3	653.368	1958.09	0.75	40.52
											eGNASPFQNk	5		N-Term(iTRAQ4plex); K10(iTRAQ4plex)	1.336	1.539	2.092	4.02	2	690.361	1379.72	-0.12	23.25
											nVTNELAEk	1		N-Term(iTRAQ4plex); K9(iTRAQ4plex)	1.1	1.662	1.71	4.42	2	653.369	1305.73	3.44	25.14
											iSkDHYSYkPAETSMSAEELVk	1		N-Term(iTRAQ4plex); K3(iTRAQ4plex); K9(iTRAQ4plex); K22(iTRAQ4plex)				3.3	4	773.167	3089.64	4.29	31.72
											tVAILEQLTEEQLDR	1		N-Term(iTRAQ4plex)	1.35	1.114	1.042	3.9	3	634.682	1902.03	0.9	57.76
											aLLQLAMEHEIHHkGNLFVYVR	1		N-Term(iTRAQ4plex); K14(iTRAQ4plex)	1.365	1.499	1.007	4.43	4	727.411	2906.62	5.11	52.29
											eIDLTSAFGR	1		N-Term(iTRAQ4plex)	1.388	1.303	2.264	3.55	2	626.837	1252.67	0.5	40.43
											dHYSYkPAETSmSAEELVk	1		N-Term(iTRAQ4plex); K6(iTRAQ4plex); M12(Oxidation); K19(iTRAQ4plex)	0.892	1.011	2.04	4.6	4	659.086	2633.32	3.03	32.33
											eGNASPFQNkQEETETDLNVLAk	1		N-Term(iTRAQ4plex); K10(iTRAQ4plex); K23(iTRAQ4plex)	1.208	1.554	2.092	4.42	4	749.391	2994.54	1.91	42.6
											tVAILEQLTEEQLDREIDLTSAFGR	2		N-Term(iTRAQ4plex)				6.42	4	748.652	2991.59	3.81	74.88
											qEETETDLNVLAk	4		N-Term(iTRAQ4plex); K13(iTRAQ4plex)	1.16	1.353	1.747	5.77	2	889.474	1777.94	-0.44	32.97
											dHYSYkPAETSMSAEELVk	1		N-Term(iTRAQ4plex); K6(iTRAQ4plex); K19(iTRAQ4plex)	1.065	0.85	1.271	6.33	3	873.114	2617.33	3.33	36.49
O34703	yjoB	Uncharacterized ATPase YjoB OS	37.12	1	12	12	27	1.137	1.117	1.637			O34703
											aAAGYGTFGYLITR	3		N-Term(iTRAQ4plex)	1.24	1.293	2.441	5.83	2	802.933	1604.86	2.08	50.55
											eGLFLIGTTNYPEEIDPGLMNR	1		N-Term(iTRAQ4plex)	1.358	1.269	0.921	5	3	875.116	2623.33	4.92	61.19
											sQVIMNPLLk	1		N-Term(iTRAQ4plex); K10(iTRAQ4plex)	1.18	1.243	1.787	4.69	2	715.935	1430.86	-1.67	41.46
											sIDQFFHSDk	4		N-Term(iTRAQ4plex); K10(iTRAQ4plex)	1.068	0.975	1.875	4.91	3	504.595	1511.77	-0.97	35.39
											aFLEGVRPR	1		N-Term(iTRAQ4plex)	1.113	1.168	1.932	3.01	3	396.904	1188.7	1.42	30.2
											aYEIGLPDEELR	1		N-Term(iTRAQ4plex)	0.955	0.854	1.411	3.97	2	774.907	1548.81	2.68	41.51
											kVTVFTDGDGGTSR	4		N-Term(iTRAQ4plex); K1(iTRAQ4plex)	1.237	1.52	2.228	6	3	576.643	1727.91	-1.61	23.82
											tFAYDEDEkEPDYTVHk	1		N-Term(iTRAQ4plex); K9(iTRAQ4plex); K17(iTRAQ4plex)	0.987	0.871	1.107	5.2	4	630.568	2519.25	7.89	30.66
											sGSLEPEHVAYIFEk	3		N-Term(iTRAQ4plex); K15(iTRAQ4plex)	1.117	0.968	1.378	5.36	3	665.355	1994.05	2.25	43.9
											nSVYAYPEk	2		N-Term(iTRAQ4plex); K9(iTRAQ4plex)	1.131	1.194	1.618	3.06	2	679.862	1358.72	-1.92	24.99
											sFYQTYDIPYkR	2		N-Term(iTRAQ4plex); K11(iTRAQ4plex)	1.335	1.3	2.046	4.96	3	623.665	1868.98	1	38.22
											sFFLNTLDGATSk	4		N-Term(iTRAQ4plex); K13(iTRAQ4plex)	1.089	1.216	1.656	5.12	2	844.961	1688.92	3.34	48.95
Q03221	tdk	Thymidine kinase OS	9.74	1	1	1	2	1.555	0.619	0.623			Q03221
											gEPFGVVPNIMAIAESVTk	2		N-Term(iTRAQ4plex); K19(iTRAQ4plex)	2.265	0.768	0.406	4.3	3	749.748	2247.23	0.47	79.06
O34789	ydjI	Uncharacterized protein YdjI OS	25.08	1	8	8	13	0.722	1.136	1.985			O34789
											yQQISMTDGMASGk	2		N-Term(iTRAQ4plex); K14(iTRAQ4plex)	0.631	1.427	2.505	4.6	2	902.944	1804.88	-0.59	33.86
											qAINIPAAGMPGGMPIR	4		N-Term(iTRAQ4plex)	0.574	0.726	2.811	5.12	3	613.336	1837.99	2.47	46.3
											iAGVkDQYFVEDIk	1		N-Term(iTRAQ4plex); K5(iTRAQ4plex); K14(iTRAQ4plex)	0.738	1.245	2.027	5.16	3	686.392	2057.16	-1.91	42.95
											vQDYISLIDk	1		N-Term(iTRAQ4plex); K10(iTRAQ4plex)	0.654	1.139	1.484	3.48	2	741.428	1481.85	2.13	47.35
											dMFNLQANAFDIAk	1		N-Term(iTRAQ4plex); K14(iTRAQ4plex)	0.865	0.91	1.025	2.9	3	629.33	1885.97	1.21	52.71
											aEVLFVNTk	2		N-Term(iTRAQ4plex); K9(iTRAQ4plex)	0.867	1.031	1.578	3.55	2	654.893	1308.78	0.89	35.42
											eGkDMFNLQANAFDIAk	1		N-Term(iTRAQ4plex); K3(iTRAQ4plex); K17(iTRAQ4plex)	0.706	1.014	1.928	6.26	3	782.085	2344.24	2.56	49.98
											dQYFVEDIk	1		N-Term(iTRAQ4plex); K9(iTRAQ4plex)	0.678	1.117	1.673	4.13	2	722.883	1444.76	1.88	34.83
P54544	misCB	Membrane protein insertase MisCB OS	5.09	1	1	1	1	1.1	1.474	2.139			P54544
											mAVIkPQVDSIQVk	1		N-Term(iTRAQ4plex); K5(iTRAQ4plex); K14(iTRAQ4plex)	1.1	1.474	2.139	4.83	3	663.403	1988.19	0.21	37.84
P96615	ydbS	UPF0699 transmembrane protein YdbS OS	20.75	1	2	2	3	0.908	1.405	2.191			P96615
											vQHVDTSQGPLLk	2		N-Term(iTRAQ4plex); K13(iTRAQ4plex)	0.824	1.382	2.991	6.35	3	570.667	1709.99	4.09	27.77
											iSTAATVHSIPALEMEEADR	1		N-Term(iTRAQ4plex)	0.945	2.195	2.725	5.46	3	762.393	2285.17	4.05	44.49
O06006	yraA	Putative cysteine protease YraA OS	46.15	1	10	10	36	1.217	1.283	1.763			O06006
											aDDRPGEFAk	5		N-Term(iTRAQ4plex); K10(iTRAQ4plex)	1.219	1.367	2.272	2.95	3	465.249	1393.73	0.76	19.19
											kDLINAGANYk	4		N-Term(iTRAQ4plex); K1(iTRAQ4plex); K11(iTRAQ4plex)	1.319	1.158	1.637	6.59	3	546.99	1638.96	1.57	27.27
											iAVLVTDQFEDIEYTSPVk	4		N-Term(iTRAQ4plex); K19(iTRAQ4plex)	0.979	1.209	1.394	5.75	3	819.112	2455.32	0.36	59.65
											dAEVVVSHNIVTSR	10		N-Term(iTRAQ4plex)	1.027	1.023	1.587	6.37	3	557.305	1669.9	0.51	30.4
											eSLNLLk	2		N-Term(iTRAQ4plex); K7(iTRAQ4plex)	1.221	1.412	1.922	3.35	2	552.847	1104.69	-0.79	32.82
											dLINAGANYk	3		N-Term(iTRAQ4plex); K10(iTRAQ4plex)	1.207	1.248	1.738	4.12	2	683.883	1366.76	1.23	28.84
											tPDDLEAFNR	4		N-Term(iTRAQ4plex)	1.403	1.536	2.197	3.8	2	661.329	1321.65	0.5	31.45
											aFVENk	1		N-Term(iTRAQ4plex); K6(iTRAQ4plex)	1.248	1.292	2.014	2.69	2	498.292	995.577	0.28	20.33
											kIAVLVTDQFEDIEYTSPVk	1		N-Term(iTRAQ4plex); K1(iTRAQ4plex); K20(iTRAQ4plex)	1.124	0.58	0.888	5.9	3	909.848	2727.53	4.51	58.36
											dLINAGANYkDAEVVVSHNIVTSR	2		N-Term(iTRAQ4plex); K10(iTRAQ4plex)	1.07	1.341	2.615	4.88	4	719.143	2873.55	4.67	45.39
Q45494	ykrA	Putative phosphatase YkrA OS	19.46	1	3	3	3	0.994	1.195	1.801			Q45494
											eIADFVTkPVDEDGIAYAVk	1		N-Term(iTRAQ4plex); K8(iTRAQ4plex); K20(iTRAQ4plex)	1.203	1.491	2.1	7.29	3	871.479	2612.42	1.05	46.99
											qADEGkHPVVFMAEDTMk	1		N-Term(iTRAQ4plex); K6(iTRAQ4plex); K18(iTRAQ4plex)	0.788	0.835	1.523	5.95	4	617.069	2465.25	0.53	34.71
											aYAAFPEFDLVR	1		N-Term(iTRAQ4plex)	0.992	1.258	1.78	4.43	2	771.909	1542.81	2.42	57.03
C0H405	ykzS	Uncharacterized protein YkzS OS	43.75	1	2	2	3	0.8	0.916	1.573			C0H405
											gIAQQGGDVIFQYLEQPR	2		N-Term(iTRAQ4plex)	1.07	0.868	1.721	5.74	3	721.718	2163.14	3.75	60.87
											vQkEHFLDFR	1		N-Term(iTRAQ4plex); K3(iTRAQ4plex)	0.705	0.943	2.134	3.11	3	536.302	1606.89	-0.94	35.12
P96667	ydeJ	Uncharacterized lipoprotein YdeJ OS	6.39	1	1	1	1	0.839	1.029	1.716			P96667
											skEDNVLAAYSSEk	1		N-Term(iTRAQ4plex); K2(iTRAQ4plex); K14(iTRAQ4plex)	0.839	1.029	1.716	4.72	3	658.359	1973.06	3.51	32.45
P54439	yrkL	Uncharacterized NAD(P)H oxidoreductase YrkL OS	35.06	1	4	4	8	1.114	1.186	1.731			P54439
											eQQLLLDHER	1		N-Term(iTRAQ4plex)	1.014	1.017	0.925	4.66	3	475.593	1424.77	2.59	27.87
											fLPAFTQYGTLHLSk	4		N-Term(iTRAQ4plex); K15(iTRAQ4plex)	1.122	1.08	2.134	7.19	3	671.049	2011.13	3.36	54.13
											qWEDDVLTHGWAYGTGGTk	1		N-Term(iTRAQ4plex); K19(iTRAQ4plex)	1.014	1.191	1.396	7.24	3	803.731	2409.18	2.71	48.06
											tLVIVIHPNLETSVVNk	2		N-Term(iTRAQ4plex); K17(iTRAQ4plex)	1.098	1.339	1.837	5.12	3	722.106	2164.3	3.85	46.96
O31864	yozE	UPF0346 protein YozE OS	35.14	1	2	2	3	0.82	1.079	1.813			O31864
											dSISEFANQAYEDHSFPk	1		N-Term(iTRAQ4plex); K18(iTRAQ4plex)	0.818	1.037	1.425	7.75	3	791.715	2373.13	2.22	43.61
											sFYHYLLk	2		N-Term(iTRAQ4plex); K8(iTRAQ4plex)	0.758	1.153	2.41	4.16	3	453.595	1358.77	-0.46	40.42
O31796	hfq	Protein hfq OS	20.55	1	1	1	1	1.15	2.067	2.964			O31796
											mkPINIQDQFLNQIR	1		N-Term(iTRAQ4plex); K2(iTRAQ4plex)	1.15	2.067	2.964	6.76	3	716.074	2146.21	1.3	49.16
P54170	yphP	UPF0403 protein YphP OS	56.25	1	7	7	25	0.882	1.399	2.22			P54170
											hEIEGHDMEEIMk	6		N-Term(iTRAQ4plex); K13(iTRAQ4plex)	0.957	1.281	2.125	6.1	3	629.305	1885.9	-1.12	29.51
											eYFTGQEPSSPSMALLk	6		N-Term(iTRAQ4plex); K17(iTRAQ4plex)	1.024	1.166	1.52	6.34	3	725.043	2173.11	2.55	47.23
											eLTGAGFEELTTAEEVENFMEk	3		N-Term(iTRAQ4plex); K22(iTRAQ4plex)	1.194	1.688	1.998	7.98	3	921.455	2762.35	6.16	65
											tPDNTVTVFAGQDkEATAk	2		N-Term(iTRAQ4plex); K14(iTRAQ4plex); K19(iTRAQ4plex)	0.979	1.339	2.158	6.32	3	809.103	2425.3	0.85	31.55
											tPDNTVTVFAGQDk	1		N-Term(iTRAQ4plex); K14(iTRAQ4plex)	0.853	1.404	1.547	5.36	2	890.969	1780.93	-0.18	30.82
											gkEVVHFIPR	3		N-Term(iTRAQ4plex); K2(iTRAQ4plex)	0.876	1.296	2.769	4.57	3	490.634	1469.89	1.94	26.97
											eVVHFIPR	4		N-Term(iTRAQ4plex)	0.997	1.53	2.758	3.61	3	380.895	1140.67	4.34	31.36
P33189	yhxA	Uncharacterized aminotransferase YhxA OS	28.44	1	8	8	15	1.096	1.685	2.467			P33189
											gAHQADSLIAQk	2		N-Term(iTRAQ4plex); K12(iTRAQ4plex)	1.325	1.615	2.727	5.59	3	509.622	1526.85	-1.27	23.77
											kELAEAAYEQLk	1		N-Term(iTRAQ4plex); K1(iTRAQ4plex); K12(iTRAQ4plex)	1.119	1.705	2.578	4.85	3	609.022	1825.05	4.09	39.08
											eLPYYPLTQSHAPAIQLAEk	2		N-Term(iTRAQ4plex); K20(iTRAQ4plex)	0.948	1.561	2.316	5.39	3	853.138	2557.4	2.99	48.02
											tGEPFGFMHYGVkPDIITMAk	2		N-Term(iTRAQ4plex); K13(iTRAQ4plex); K21(iTRAQ4plex)	1.609	3.643	4.381	6.14	3	924.494	2771.47	1.58	51.98
											aYHGNTLGALSATGQAQR	1		N-Term(iTRAQ4plex)	0.872	1.585	2.815	5.22	3	654.012	1960.02	4.7	29.59
											qkDEQFVWHAMk	2		N-Term(iTRAQ4plex); K2(iTRAQ4plex); K12(iTRAQ4plex)	1.242	2.446	3.171	3.74	4	495.52	1979.06	3.08	34.72
											yEPLSQGFLHAAPPDIYR	2		N-Term(iTRAQ4plex)	1.176	1.969	3.044	5.37	3	740.055	2218.15	3.75	49.61
											gITSAYLPLSATAVk	3		N-Term(iTRAQ4plex); K15(iTRAQ4plex)	1.195	2.813	4.099	5.04	2	890.525	1780.04	-1.49	45.84
O31710	yknX	Putative efflux system component YknX OS	27.32	1	9	9	11	0.868	0.858	1.432			O31710
											vSDLEVk	1		N-Term(iTRAQ4plex); K7(iTRAQ4plex)	0.774	0.721	1.159	2.72	2	539.324	1077.64	0.7	25.78
											kEDDQYYVYTVk	1		N-Term(iTRAQ4plex); K1(iTRAQ4plex); K12(iTRAQ4plex)	0.771	0.942	1.152	4.82	3	661.688	1983.05	2.97	30.19
											vTLTSDVIQGk	2		N-Term(iTRAQ4plex); K11(iTRAQ4plex)	0.931	1	1.519	3.03	2	724.934	1448.86	3.33	34.5
											gTALVTYTNEQLSLEk	1		N-Term(iTRAQ4plex); K16(iTRAQ4plex)	0.825	1.034	0.803	3.14	3	685.713	2055.12	1.39	44.25
											eQNQLTSESNR	1		N-Term(iTRAQ4plex)	0.743	0.739	1.123	4.25	2	725.356	1449.7	-0.54	13.86
											lSEYDTLk	1		N-Term(iTRAQ4plex); K8(iTRAQ4plex)	0.697	0.724	1.187	3.38	2	628.852	1256.7	-0.76	32.2
											kSDIQEPVIHIGNPk	2		N-Term(iTRAQ4plex); K1(iTRAQ4plex); K15(iTRAQ4plex)	0.887	0.848	1.992	5.35	3	703.083	2107.23	4.63	32.16
											iGEVTDDLTEIk	1		N-Term(iTRAQ4plex); K12(iTRAQ4plex)	0.798	0.807	1.368	5.4	2	810.953	1620.9	2.93	41.62
											gNLPEGkPGFk	1		N-Term(iTRAQ4plex); K7(iTRAQ4plex); K11(iTRAQ4plex)	1.026	0.738	2.071	3.41	3	525.976	1575.91	-5.02	24.66
P94550	etfB	Electron transfer flavoprotein subunit beta OS	26.07	1	5	5	5	1.463	2.181	3.325			P94550
											kkPLEELELDDLDLDEEDAEPk	1		N-Term(iTRAQ4plex); K1(iTRAQ4plex); K2(iTRAQ4plex); K22(iTRAQ4plex)		1.172		3.6	4	790.674	3159.67	3.35	47.81
											mNLFVLMk	1		N-Term(iTRAQ4plex); K8(iTRAQ4plex)	1.287	2.654	3.577	2.95	2	642.378	1283.75	1.94	57.63
											hGGTITAVTVGGEEAEk	1		N-Term(iTRAQ4plex); K17(iTRAQ4plex)	1.746	2.433	3.025	4.68	3	648.68	1944.03	-0.9	28.3
											lLQGEPAEQAk	1		N-Term(iTRAQ4plex); K11(iTRAQ4plex)	1.305	2.706	3.116	4.26	2	736.423	1471.84	2.04	27.42
											yPSLPGIMk	1		N-Term(iTRAQ4plex); K9(iTRAQ4plex)	1.392	2.195	4.111	3.04	2	647.376	1293.75	-1.77	44.25
P55340	ecsB	Protein EcsB OS	2.94	1	1	1	1	1.152	1.279	1.772			P55340
											iANLFTDVPHLR	1		N-Term(iTRAQ4plex)	1.152	1.279	1.772	4.3	3	513.964	1539.88	0.64	52.99
O07516	yhaH	Uncharacterized membrane protein YhaH OS	44.07	1	6	6	12	1.002	1.438	2.145			O07516
											eIADIEEk	2		N-Term(iTRAQ4plex); K8(iTRAQ4plex)	0.963	1.481	2.297	3.62	2	617.842	1234.68	0.08	29.72
											tNYDSFEETIk	1		N-Term(iTRAQ4plex); K11(iTRAQ4plex)	1.013	1.848	1.829	5.51	2	817.914	1634.82	2.92	33.76
											eSTDVIk	1		N-Term(iTRAQ4plex); K7(iTRAQ4plex)	1.114	1.467	2.01	2.71	2	540.313	1079.62	0.01	18.79
											wQEEIkPHQQDLQk	2		N-Term(iTRAQ4plex); K6(iTRAQ4plex); K14(iTRAQ4plex)	1.102	1.523	2.762	4.76	3	747.079	2239.22	0.76	28.99
											tNYDSFEETIkR	3		N-Term(iTRAQ4plex); K11(iTRAQ4plex)	0.834	1.457	1.743	5.11	3	597.644	1790.92	1.2	34.26
											dVGGELQTSIk	3		N-Term(iTRAQ4plex); K11(iTRAQ4plex)	1.051	1.361	1.946	5.18	2	717.9	1434.79	-7.85	28.8
O34932	coaE	Dephospho-CoA kinase OS	15.74	1	3	3	3	1.14	1.648	2.261			O34932
											sQMPLEEk	1		N-Term(iTRAQ4plex); K8(iTRAQ4plex)	1.158	1.554	2.499	3.36	2	625.338	1249.67	-0.49	23.36
											nQLTEEEAVSR	1		N-Term(iTRAQ4plex)	0.841	1.962	1.866	3.98	2	710.364	1419.72	0.08	24.3
											lALNAIVHPAVR	1		N-Term(iTRAQ4plex)	1.419	1.428	2.419	4.16	3	473.298	1417.88	2.99	41.8
P35162	resC	Cytochrome c biogenesis protein ResC OS	5.88	1	1	1	2	1.089	0.967	1.449			P35162
											sVMVYEMPALVGPHQGELLTEGR	2		N-Term(iTRAQ4plex)	1.14	1.071	1.488	9.13	3	886.458	2657.36	1.24	54.02
P94474	yeaC	Uncharacterized protein YeaC OS	9.69	1	2	2	3	1.222	0.952	1.227			P94474
											dYVIPDDIQYLAPFTLPHR	1		N-Term(iTRAQ4plex)	1.528	0.6	0.959	5.43	3	806.425	2417.26	-1.13	65.34
											qHPSVQLGVSPR	2		N-Term(iTRAQ4plex)	0.999	0.875	1.301	4.42	3	483.609	1448.81	2.6	25.53
Q01368	spoIIIAB	Stage III sporulation protein AB OS	5.26	1	1	1	1	0.888	1.288	2.018			Q01368
											kVWDTLSLk	1		N-Term(iTRAQ4plex); K1(iTRAQ4plex); K9(iTRAQ4plex)	0.888	1.288	2.018	3.15	3	507.979	1521.92	-9.05	31.62
P08877	ptsH	Phosphocarrier protein HPr OS	48.86	1	3	3	78	0.726	0.981	1.672			P08877
											gAEITISASGADENDALNALEETMk	31		N-Term(iTRAQ4plex); K25(iTRAQ4plex)				6.77	4	710.357	2838.41	5.47	56.48
											gAEITISASGADENDALNALEETmk	1		N-Term(iTRAQ4plex); M24(Oxidation); K25(iTRAQ4plex)	0.937	1.246	1.184	3.86	3	952.134	2854.39	0.6	48.23
											sIMGVMSLGIAk	35		N-Term(iTRAQ4plex); K12(iTRAQ4plex)	0.631	1.173	2.022	5.2	2	747.934	1494.86	-1.37	52.25
											gAEITISASGADENDALNALEETMkSEGLGE	2		N-Term(iTRAQ4plex); K25(iTRAQ4plex)				6.85	3	1137.56	3410.66	7.05	68.04
											sImGVmSLGIAk	2		N-Term(iTRAQ4plex); M3(Oxidation); M6(Oxidation); K12(iTRAQ4plex)	0.974	1.689	2.622	3.12	2	763.931	1526.85	1.08	35.82
											sIMGVmSLGIAk	4		N-Term(iTRAQ4plex); M6(Oxidation); K12(iTRAQ4plex)	0.705	1.244	1.93	4.23	2	755.932	1510.86	-1.14	42.4
											sImGVMSLGIAk	3		N-Term(iTRAQ4plex); M3(Oxidation); K12(iTRAQ4plex)	0.68	1.178	2.027	4.69	2	755.932	1510.86	-0.65	44.38
P54518	yqhT	Uncharacterized peptidase YqhT OS	30.03	1	6	6	13	1.088	1.637	1.887			P54518
											gFEIIEHGGSLIQTTADTVESFGIk	2		N-Term(iTRAQ4plex); K25(iTRAQ4plex)				6.91	3	979.854	2937.55	1.37	73.85
											gYGDYFGHSTGHGLGMEVHESPGLSVR	2		N-Term(iTRAQ4plex)	1.11	0.641	1.489	6.9	4	748.355	2990.4	0.19	40.78
											tVAVGQPSDQLk	2		N-Term(iTRAQ4plex); K12(iTRAQ4plex)	0.958	2.204	2.103	4.02	2	765.942	1530.88	2.12	27.11
											sSLPHGVASDk	1		N-Term(iTRAQ4plex); K11(iTRAQ4plex)	1.111	1.406	2.025	3.62	3	462.593	1385.77	1.93	19.85
											eIYQVVFDAQALGVAHIkPGMTGk	4		N-Term(iTRAQ4plex); K18(iTRAQ4plex); K24(iTRAQ4plex)	1.16	1.491	1.828	8.88	4	751.922	3004.66	-0.36	57.73
											iLEEAAk	2		N-Term(iTRAQ4plex); K7(iTRAQ4plex)	1.05	1.679	1.705	2.91	2	531.325	1061.64	-0.86	26.13
P32081	cspB	Cold shock protein CspB OS	89.55	1	6	6	260	0.668	0.949	1.791			P32081
											gFGFIEVEGQDDVFVHFSAIQGEGFk	85		N-Term(iTRAQ4plex); K26(iTRAQ4plex)	0.52	0.658	1.703	9.47	3	1049.87	3147.59	8.2	78.89
											tLEEGQAVSFEIVEGNRGPQAANVTk	1		N-Term(iTRAQ4plex); K26(iTRAQ4plex)	0.636	0.982	1.649	7.67	3	1011.53	3032.59	-0.35	44.29
											vkWFNSEk	2		N-Term(iTRAQ4plex); K2(iTRAQ4plex); K8(iTRAQ4plex)	0.518	0.6	1.311	3.55	3	490.623	1469.85	3.94	30.79
											gPQAANVTk	22		N-Term(iTRAQ4plex); K9(iTRAQ4plex)	0.68	1.166	2.351	3.88	2	587.346	1173.68	1.15	15.4
											tLEEGQAVSFEIVEGNR	148		N-Term(iTRAQ4plex)	0.744	0.77	0.816	6.89	3	674.681	2022.03	0.57	57.65
											wFNSEk	2		N-Term(iTRAQ4plex); K6(iTRAQ4plex)	0.528	1.05	1.252	2.57	2	549.795	1098.58	1.08	33.18
P39586	ywbC	Uncharacterized protein YwbC OS	34.13	1	4	4	13	0.866	1.305	2.018			P39586
											dINASITFYEEVLGMk	3		N-Term(iTRAQ4plex); K16(iTRAQ4plex)	1.313	1.912	2.881	4.62	3	706.707	2118.11	1.5	68.71
											iDHTGIMVR	3		N-Term(iTRAQ4plex)	0.876	1.363	2.083	3.94	3	395.89	1185.66	1.71	26.03
											vHHIALLTDDIAAEYTk	5		N-Term(iTRAQ4plex); K17(iTRAQ4plex)	0.697	1.877	2.703	6.22	3	733.407	2198.21	0.6	43.76
											rIDHTGIMVR	2		N-Term(iTRAQ4plex)	0.826	0.918	1.452	3.36	3	447.923	1341.76	1.07	22.57
O31441	ybyB	Uncharacterized protein YbyB OS	15.12	1	1	1	1	0.788	1.02	1.647			O31441
											aGHPDPQDIEDNk	1		N-Term(iTRAQ4plex); K13(iTRAQ4plex)	0.788	1.02	1.647	3.32	3	575.288	1723.85	-0.23	20.71
P19670	murAB	UDP-N-acetylglucosamine 1-carboxyvinyltransferase 2 OS	21.21	1	7	7	9	1.161	1.167	1.485			P19670
											kLEGLGATIWR	2		N-Term(iTRAQ4plex); K1(iTRAQ4plex)	1.164	1.326	1.524	5.16	3	511.314	1531.93	3.94	42.71
											aSYYLMGAMLGR	1		N-Term(iTRAQ4plex)	1.226	1.462	1.807	4.35	2	738.877	1476.75	0.33	54.24
											gYSSLEk	1		N-Term(iTRAQ4plex); K7(iTRAQ4plex)	1.028	0.878	1.1	2.56	2	536.3	1071.59	0.45	23.55
											ikGAGTNVIR	1		N-Term(iTRAQ4plex); K2(iTRAQ4plex)	1.191	1.389	1.795	3.96	3	439.613	1316.82	-1.32	23.45
											eVIIDNVIPTHLESLTAk	2		N-Term(iTRAQ4plex); K18(iTRAQ4plex)	1.131	1.313	1.756	6.47	3	760.777	2280.32	5.06	52.59
											tLVYPGFPTDLQQPMTALLTR	1		N-Term(iTRAQ4plex)				3.12	3	836.123	2506.35	1.44	67.16
											mTDEEIEQLQNS	1		N-Term(iTRAQ4plex)	0.854	0.782	0.943	3	2	790.865	1580.72	-0.86	36.77
P16263	odhB	Dihydrolipoyllysine-residue succinyltransferase component of 2-oxoglutarate dehydrogenase complex OS	54.44	1	18	18	68	1.18	2.508	3.303			P16263
											dQFFEQNEVk	1		N-Term(iTRAQ4plex); K10(iTRAQ4plex)	1.098	1.91	1.979	3.33	2	786.402	1571.8	1.04	31.28
											qAEPAAQEVSEEAQSEAk	4		N-Term(iTRAQ4plex); K18(iTRAQ4plex)	1.331	4.074	5.753	7.6	2	1095.54	2190.08	0.42	29.07
											kDQFFEQNEVk	2		N-Term(iTRAQ4plex); K1(iTRAQ4plex); K11(iTRAQ4plex)	1.017	2.665	3.155	7.31	3	615.335	1843.99	-0.22	29.12
											eAVGFLVTIk	9		N-Term(iTRAQ4plex); K10(iTRAQ4plex)	1.025	2.104	2.848	4.43	2	682.923	1364.84	0.32	47.41
											fENRPMMYIALSYDHR	4		N-Term(iTRAQ4plex)	1.412	3.016	2.863	6	3	729.692	2187.06	0.84	47.29
											lTFAGIEk	6		N-Term(iTRAQ4plex); K8(iTRAQ4plex)	1.2	3.408	4.232	3.38	2	583.854	1166.7	-2.13	39.47
											aVVAALk	3		N-Term(iTRAQ4plex); K7(iTRAQ4plex)	1.227	2.826	5.042	3.31	2	480.328	959.648	-1.01	25.39
											aQQSFDkPVEVQk	8		N-Term(iTRAQ4plex); K7(iTRAQ4plex); K13(iTRAQ4plex)	1.654	4.168	6.901	5.02	3	646.035	1936.09	2.41	27.34
											kFYDIGIAVAADEGLVVPVVR	3		N-Term(iTRAQ4plex); K1(iTRAQ4plex)	1.2	1.39	1.585	7.5	3	840.491	2519.46	4.53	63.61
											kYPLLNAEIQGDELIVk	4		N-Term(iTRAQ4plex); K1(iTRAQ4plex); K17(iTRAQ4plex)	1.039	2.799	3.019	6.77	3	792.471	2375.4	2.88	50.46
											ekGIDLSQVPTGDPLGR	1		N-Term(iTRAQ4plex); K2(iTRAQ4plex)	0.998	1.337	1.18	4.01	3	690.719	2070.14	-0.48	39.92
											dSGDTVQVGEIIGTISEGAGESSAPAPTEk	2		N-Term(iTRAQ4plex); K30(iTRAQ4plex)				5.89	3	1064.2	3190.58	-0.83	53.77
											iQLRPVAIDEER	5		N-Term(iTRAQ4plex)	1.129	3.424	3.55	4.3	3	528.308	1582.91	3.79	36.99
											vPELAESISEGTIAQWLk	5		N-Term(iTRAQ4plex); K18(iTRAQ4plex)	1.266	3.044	3.983	6.73	2	1130.14	2259.27	8.13	69.06
											nLLEDPEQLLLEG	1		N-Term(iTRAQ4plex)	1.2	2.023	1.754	2.77	2	813.943	1626.88	5.19	67.39
											gIDLSQVPTGDPLGR	6		N-Term(iTRAQ4plex)	1.313	2.653	4.236	4.96	2	834.956	1668.91	0.77	41.88
											lGFMSFFTk	2		N-Term(iTRAQ4plex); K9(iTRAQ4plex)	1.318	4.052	4.294	4.13	2	683.378	1365.75	0.73	62.8
											eIGELAk	2		N-Term(iTRAQ4plex); K7(iTRAQ4plex)	1.361	2.67	3.974	3.12	2	524.317	1047.63	-1.43	27.43
P37563	tilS	tRNA(Ile)-lysidine synthase OS	2.97	1	1	1	1	1.401	1.317	1.652			P37563
											gTLGTGLAGMQPVR	1		N-Term(iTRAQ4plex)	1.401	1.317	1.652	4.18	2	751.417	1501.83	-1.13	38.17
O31705	moaE	Molybdopterin synthase catalytic subunit OS	34.39	1	6	6	10	1.019	1.237	1.813			O31705
											qIVPIWk	1		N-Term(iTRAQ4plex); K7(iTRAQ4plex)	1.122	1.482	2.472	2.82	2	586.375	1171.74	-1.44	42.39
											aAYEANEYAIER	1		N-Term(iTRAQ4plex)	1.018	1.051	2.62	2.59	2	772.374	1543.74	-6.27	29.71
											kAAYEANEYAIER	1		N-Term(iTRAQ4plex); K1(iTRAQ4plex)	0.921	1.479	1.844	6.05	3	605.988	1815.95	1.48	28.8
											tPINTENIIk	4		N-Term(iTRAQ4plex); K10(iTRAQ4plex)	1.09	1.039	1.264	3.47	2	715.924	1430.84	-2.89	31.9
											wEGASAAITHR	2		N-Term(iTRAQ4plex)	0.906	1.713	1.886	4.32	3	448.238	1342.7	0.06	30
											eAGAITTFIGTVR	1		N-Term(iTRAQ4plex)	0.987	1.387	1.728	4.33	2	740.419	1479.83	0.63	49.7
O34525	sppA	Putative signal peptide peptidase SppA OS	17.61	1	4	4	9	0.876	1.252	1.614			O34525
											kPIYVSMGSMAASGGYYISTAADk	2		N-Term(iTRAQ4plex); K1(iTRAQ4plex); K24(iTRAQ4plex)				7.21	3	967.505	2900.5	3.64	50.2
											mMYLYAk	1		N-Term(iTRAQ4plex); K7(iTRAQ4plex)	0.98	1.259	1.127	2.73	2	604.324	1207.64	-3.61	38.12
											kLNLVDELGFYDDTITAMk	1		N-Term(iTRAQ4plex); K1(iTRAQ4plex); K19(iTRAQ4plex)	0.869	1.425	1.886	7.33	3	873.478	2618.42	3.59	64.26
											lGISFETIk	5		N-Term(iTRAQ4plex); K9(iTRAQ4plex)	0.869	1.32	1.912	3.86	2	648.394	1295.78	-0.51	45.19
O34896	uxuB	Uncharacterized oxidoreductase UxuB OS	6.83	1	1	1	1	0.855	0.252	0.59			O34896
											eITAAGGTACAVAADVLDR	1		N-Term(iTRAQ4plex)	0.855	0.252	0.59	2.2	2	974.503	1948	3.26	45.11
O06977	yvcN	Uncharacterized acetyltransferase YvcN OS	5.12	1	1	1	2	1.316	1.218	1.523			O06977
											dHVSFGDLPLFLk	2		N-Term(iTRAQ4plex); K13(iTRAQ4plex)	1.299	1.239	1.535	4.19	3	592.67	1776	1.18	57.51
P37503	yybA	Uncharacterized HTH-type transcriptional regulator YybA OS	5.33	1	1	1	2	1.092	0.939	1.379			P37503
											gQYLYLVR	2		N-Term(iTRAQ4plex)	1.029	0.878	1.158	3.22	2	578.338	1155.67	3.55	40.69
O34666	ctpA	Carboxy-terminal processing protease CtpA OS	21.03	1	8	8	14	1.027	1.135	1.645			O34666
											gNPGGLMEQAITMSNLFIDk	2		N-Term(iTRAQ4plex); K20(iTRAQ4plex)	1.083	0.792	1.215	5.51	3	808.756	2424.25	1.44	75.87
											eYDDGSTVk	1		N-Term(iTRAQ4plex); K9(iTRAQ4plex)	1.069	1.322	1.911	3.5	2	651.326	1301.65	-0.8	17.28
											lMIELQk	3		N-Term(iTRAQ4plex); K7(iTRAQ4plex)	1.231	1.306	1.986	3.25	2	581.858	1162.71	-1.02	39.02
											wLTADGEWIHk	1		N-Term(iTRAQ4plex); K11(iTRAQ4plex)	1.196	1.263	1.722	5.33	3	548.63	1643.88	-2.04	43.62
											gMNVNEAVALIR	2		N-Term(iTRAQ4plex)	1.126	0.954	1.749	4.93	2	715.899	1430.79	-0.58	47.87
											gYILDLR	3		N-Term(iTRAQ4plex)	1.073	1.056	1.832	2.78	2	497.297	993.587	1.82	38.67
											gMIQSLDDPYSTYMDQEQAk	1		N-Term(iTRAQ4plex); K20(iTRAQ4plex)	0.79	1.419	1.622	4.61	3	870.08	2608.22	3.67	45.96
											aGVGNIDLSIkR	1		N-Term(iTRAQ4plex); K11(iTRAQ4plex)	0.897	0.957	1.215	3.37	3	510.979	1530.92	1.42	33.15
P06533	sinR	HTH-type transcriptional regulator SinR OS	17.12	1	2	2	5	0.986	1.046	1.587			P06533
											dAMTSGVSk	3		N-Term(iTRAQ4plex); K9(iTRAQ4plex)	0.978	1	1.616	3.26	2	592.316	1183.62	1.51	19.4
											gYSLSELAEk	2		N-Term(iTRAQ4plex); K10(iTRAQ4plex)	1.126	1.134	2.052	5.15	2	692.881	1384.76	-0.42	38.26
Q797E6	ydhG	Uncharacterized protein YdhG OS	32.52	1	3	3	3	0.872	0.885	1.341			Q797E6
											vTIAHVEDDIVk	1		N-Term(iTRAQ4plex); K12(iTRAQ4plex)	0.742	1.071	1.649	5.73	3	542.983	1626.93	1.89	37.63
											nkYPNLHTEIk	1		N-Term(iTRAQ4plex); K2(iTRAQ4plex); K11(iTRAQ4plex)	0.889	1.217	1.335	3.96	4	448.014	1789.03	-0.08	25.5
											mDVFSEYLAGIADPFHR	1		N-Term(iTRAQ4plex)	0.985	0.367	1.039	4.82	3	704.682	2112.03	-1.45	72.94
P16304	adk	Adenylate kinase OS	50.23	1	10	10	78	0.975	0.924	1.446			P16304
											mNLVLmGLPGAGk	1		N-Term(iTRAQ4plex); M6(Oxidation); K13(iTRAQ4plex)	1.191	1.433	1.375	3.21	3	535.642	1604.91	0.74	47.01
											aDDNEETVSk	2		N-Term(iTRAQ4plex); K10(iTRAQ4plex)	1.179	1.158	1.896	3.95	2	698.346	1395.69	0.64	13.91
											aAMkEETPLGLEAk	7		N-Term(iTRAQ4plex); K4(iTRAQ4plex); K14(iTRAQ4plex)	0.979	1.079	1.935	6.79	2	960.547	1920.09	1.77	32.9
											iVEDYGIPHISTGDmFR	1		N-Term(iTRAQ4plex); M15(Oxidation)	0.817	0.861	1.269	4.77	3	704.017	2110.04	-0.95	46.34
											gELVPDEVTIGIVk	3		N-Term(iTRAQ4plex); K14(iTRAQ4plex)	0.925	0.905	1.366	4.71	2	879.02	1757.03	1.05	45.5
											iVEDYGIPHISTGDMFR	5		N-Term(iTRAQ4plex)	0.856	0.891	1.451	5.51	3	698.688	2094.05	2.76	52.78
											mNLVLMGLPGAGk	10		N-Term(iTRAQ4plex); K13(iTRAQ4plex)	1.083	1.105	1.206	4.45	2	794.961	1588.92	-0.14	50.3
											sYIDkGELVPDEVTIGIVk	3		N-Term(iTRAQ4plex); K5(iTRAQ4plex); K19(iTRAQ4plex)	1.308	1.229	1.766	8.71	3	836.485	2507.44	2.67	50.05
											dLLGGLk	7		N-Term(iTRAQ4plex); K7(iTRAQ4plex)	1.083	1.094	1.623	2.96	2	502.322	1003.64	-1.9	36.68
											aAmkEETPLGLEAk	1		N-Term(iTRAQ4plex); M3(Oxidation); K4(iTRAQ4plex); K14(iTRAQ4plex)	1.041	1.265	2.007	5.47	3	646.033	1936.09	3.52	29.81
											qTQPLLDFYSEk	4		N-Term(iTRAQ4plex); K12(iTRAQ4plex)	0.823	0.963	1.052	5.6	3	586.317	1756.94	0.38	46.4
											dGGELYQR	1		N-Term(iTRAQ4plex)	0.877	0.92	1.195	2.66	2	541.274	1081.54	0.78	19.09
											gFLLDGFPR	33		N-Term(iTRAQ4plex)	0.969	0.892	1.901	3.63	2	583.329	1165.65	2.46	52.17
P96611	ydbP	Thioredoxin-like protein YdbP OS	74.53	1	5	5	17	0.856	1.395	2.253			P96611
											yQVMGIPSLLIFk	3		N-Term(iTRAQ4plex); K13(iTRAQ4plex)	0.676	1.41	2.45	3.86	2	899.033	1797.06	0.5	67.39
											iTTNEQFNELIQSDkEIIVk	2		N-Term(iTRAQ4plex); K15(iTRAQ4plex); K20(iTRAQ4plex)	0.629	1.364	1.601	8.04	3	932.192	2794.56	2.18	53.65
											kITTNEQFNELIQSDk	1		N-Term(iTRAQ4plex); K1(iTRAQ4plex); K16(iTRAQ4plex)	0.913	1.131	1.806	6.83	3	780.766	2340.28	2.21	40.29
											tPEEVTEFLSEHIS	8		N-Term(iTRAQ4plex)	1.085	1.481	3.11	5	3	587.962	1761.87	3.66	55.12
											yQVmGIPSLLIFk	1		N-Term(iTRAQ4plex); M4(Oxidation); K13(iTRAQ4plex)	0.879	1.168	1.545	3.16	3	605.025	1813.06	3.79	61.82
											mNMFIGDILEEYNQNDWYELNkDELPDLAEk	2		N-Term(iTRAQ4plex); K22(iTRAQ4plex); K31(iTRAQ4plex)				5.44	4	1056.27	4222.08	9.73	76.51
P06534	spo0A	Stage 0 sporulation protein A OS	13.86	1	3	3	6	0.966	1.328	2.085			P06534
											hAIEVAWSR	1		N-Term(iTRAQ4plex)	0.905	1.431	1.971	3.46	3	404.892	1212.66	1.36	30.14
											kQPNVIMLTAFGQEDVTk	2		N-Term(iTRAQ4plex); K1(iTRAQ4plex); K18(iTRAQ4plex)	0.946	1.156	1.093	4.86	3	817.791	2451.36	-2.19	46.5
											aPSSQSSIIR	3		N-Term(iTRAQ4plex)	0.934	1.425	3.172	3.82	2	595.337	1189.67	0.05	22.48
P54496	yqgS	Lipoteichoic acid synthase-like YqgS OS	2.04	1	1	1	1	1.117	1.406	1.964			P54496
											vPLVIHIPGITDk	1		N-Term(iTRAQ4plex); K13(iTRAQ4plex)	1.117	1.406	1.964	3.75	3	564.023	1690.06	2.83	52.46
P96602	dctR	Probable C4-dicarboxylate response regulator DctR OS	6.64	1	1	1	1	1.008	1.862	2.689			P96602
											gLNHFTMNEVTAFLk	1		N-Term(iTRAQ4plex); K15(iTRAQ4plex)	1.008	1.862	2.689	5.13	3	670.698	2010.08	3.53	56.15
P70949	yitW	MIP18 family protein YitW OS	22.55	1	3	3	22	1.039	1.043	1.599			P70949
											dTEVHIVWNPPWTR	18		N-Term(iTRAQ4plex)	0.909	1.353	1.733	4.5	3	631.998	1893.98	4.03	49.52
											aLADLPEVk	3		N-Term(iTRAQ4plex); K9(iTRAQ4plex)	0.852	1.447	2.45	3.66	2	622.379	1243.75	-0.11	36.64
											aLADLPEVkDTEVHIVWNPPWTR	1		N-Term(iTRAQ4plex); K9(iTRAQ4plex)	1.715	1.097	2.739	5.39	4	744.406	2974.6	-0.85	57.65
O34459	hisZ	ATP phosphoribosyltransferase regulatory subunit OS	9.46	1	3	3	3	1.177	2.362	3.322			O34459
											tLVLRPDMTGPIAR	1		N-Term(iTRAQ4plex)	1.1	2.475	3.446	3.38	3	561.995	1683.97	-0.12	39.87
											aQAIAYANEER	1		N-Term(iTRAQ4plex)	1.05	1.508	2.141	3.82	2	690.356	1379.7	0.66	25.01
											sFANVTYFIGAR	1		N-Term(iTRAQ4plex)	1.383	3.103	4.38	4.01	2	745.4	1489.79	0.26	51.98
P31847	ypuA	Uncharacterized protein YpuA OS	63.1	1	12	12	29	1.28	1.5	1.946			P31847
											aYEVSSDEAISEDVk	1		N-Term(iTRAQ4plex); K15(iTRAQ4plex)	0.868	1.283	2.052	4.17	3	643.99	1929.95	0.77	32.25
											yISNAQIGSR	3		N-Term(iTRAQ4plex)	1.239	1.589	2.005	3.73	2	626.842	1252.68	0.42	27.34
											gSGLNVETHNISGITDEMYLNALMTAGVk	1		N-Term(iTRAQ4plex); K29(iTRAQ4plex)	1.901	1.375	4.6	6.97	4	831.68	3323.7	3.43	65.05
											nADIDWGQVSDQLDk	2		N-Term(iTRAQ4plex); K15(iTRAQ4plex)	1.261	1.677	1.247	5.76	3	664.669	1991.99	1.21	41.32
											qVDDAASDLNVTLTDSQk	1		N-Term(iTRAQ4plex); K18(iTRAQ4plex)	1.419	1.28	1.514	6.05	3	736.713	2208.12	0.63	40.88
											qVANQELVTTSELGDk	2		N-Term(iTRAQ4plex); K16(iTRAQ4plex)	1.428	1.986	1.955	7.14	2	1010.55	2020.08	1.38	32.82
											aISSSSITIAk	5		N-Term(iTRAQ4plex); K11(iTRAQ4plex)	1.328	1.663	2.541	4.74	2	683.415	1365.82	3	30.64
											vLDEMNVPDNATTVTVTNkEEHEYLGk	2		N-Term(iTRAQ4plex); K19(iTRAQ4plex); K27(iTRAQ4plex)	0.805	1.552	1.881	7.48	4	870.449	3478.77	0.11	42.65
											iGNENAAALIAk	2		N-Term(iTRAQ4plex); K12(iTRAQ4plex)	1.139	1.149	1.382	4.16	2	736.937	1472.87	-0.47	34.85
											vYVTAPFEVSGTAALTGLIk	6		N-Term(iTRAQ4plex); K20(iTRAQ4plex)	1.138	1.608	1.656	5.6	3	775.784	2325.34	2.42	63.08
											kGSGLNVETHNISGITDEMYLNALMTAGVk	1		N-Term(iTRAQ4plex); K1(iTRAQ4plex); K30(iTRAQ4plex)				3.54	4	899.728	3595.89	2.22	61.15
											nQLVSLFNk	3		N-Term(iTRAQ4plex); K9(iTRAQ4plex)	1.352	1.859	1.638	4.22	2	675.901	1350.79	-3.34	44.65
P39795	treA	Trehalose-6-phosphate hydrolase OS	43.67	1	25	25	83	1.407	0.877	0.993			P39795
											sFYTDGPR	4		N-Term(iTRAQ4plex)	1.367	0.838	0.819	3.03	2	543.772	1086.54	1.98	26.1
											gMADQDITAILQAk	3		N-Term(iTRAQ4plex); K14(iTRAQ4plex)	1.585	1.104	1.485	6.27	2	881.987	1762.97	2.78	47.91
											dYYSIYPEYGTMEDFER	2		N-Term(iTRAQ4plex)	1.309	0.853	0.89	4.66	2	1161.51	2322.01	3.06	50.52
											lDVINLISk	8		N-Term(iTRAQ4plex); K9(iTRAQ4plex)	1.47	0.98	0.966	4.14	2	651.917	1302.83	1.86	52.2
											yTNPDNkELDMTFSFHHLk	2		N-Term(iTRAQ4plex); K7(iTRAQ4plex); K19(iTRAQ4plex)	1.748	0.712	1.239	8.11	5	554.686	2769.4	-1.4	42.2
											eLDMTFSFHHLk	2		N-Term(iTRAQ4plex); K12(iTRAQ4plex)	1.455	0.729	1.141	5.76	3	598.314	1792.93	-1.3	43.05
											aVVYQIYPk	3		N-Term(iTRAQ4plex); K9(iTRAQ4plex)	1.621	0.856	1.274	4.01	2	684.908	1368.81	-2.89	35.43
											dQNSVFYHYQk	3		N-Term(iTRAQ4plex); K11(iTRAQ4plex)	1.164	0.691	0.841	5.85	3	572.961	1716.87	5.42	29.22
											eGLQNMTLRPYESIVYR	10		N-Term(iTRAQ4plex)	1.444	0.811	0.868	4.94	3	738.388	2213.15	0.07	48.07
											fTDISSYR	6		N-Term(iTRAQ4plex)	1.246	0.74	0.797	3.23	2	566.79	1132.57	-2.62	35.11
											aEVLLTNDEAR	1		N-Term(iTRAQ4plex)	1.088	1.146	1.65	4.02	2	687.872	1374.74	1.39	28.41
											wALAPFDFLk	9		N-Term(iTRAQ4plex); K10(iTRAQ4plex)	1.417	0.796	1.053	3.59	2	748.433	1495.86	2.42	66.34
											kAVVYQIYPk	1		N-Term(iTRAQ4plex); K1(iTRAQ4plex); K10(iTRAQ4plex)	1.079	1.02	0.928	4.25	3	547.674	1641.01	-1.98	32.74
											vVMDLVVNHTSTEHk	2		N-Term(iTRAQ4plex); K15(iTRAQ4plex)	1.465	0.83	1.231	7.1	3	666.364	1997.08	1.94	36.38
											mkTEQTPWWk	1		N-Term(iTRAQ4plex); K2(iTRAQ4plex); K10(iTRAQ4plex)	1.207	0.949	0.814	4.56	3	589.659	1766.96	-0.72	36.22
											tEQTPWWk	2		N-Term(iTRAQ4plex); K8(iTRAQ4plex)	1.318	0.87	0.725	3.45	2	682.365	1363.72	-1.6	36.32
											hVYDMMHFWFEk	2		N-Term(iTRAQ4plex); K12(iTRAQ4plex)	1.44	0.744	0.846	6.27	4	490.24	1957.94	3.45	56.18
											kHVYDMMHFWFEk	3		N-Term(iTRAQ4plex); K1(iTRAQ4plex); K13(iTRAQ4plex)	1.128	0.633	0.779	5.61	4	558.288	2230.13	-0.86	50.26
											dFYIWk	1		N-Term(iTRAQ4plex); K6(iTRAQ4plex)	1.311	0.934	1.311	2.59	2	580.321	1159.64	-2.89	47.21
											dVESLNMYHAFk	8		N-Term(iTRAQ4plex); K12(iTRAQ4plex)	1.5	0.778	1.03	4.95	3	581.3	1741.89	1.84	38.52
											fPNAEEGDGR	1		N-Term(iTRAQ4plex)	1.215	0.82	0.927	2.54	2	618.292	1235.58	-0.42	23.35
											eAISSIDSPYR	3		N-Term(iTRAQ4plex)	1.307	0.861	0.922	4.22	2	691.358	1381.71	1.18	29.34
											dDPNIFAYLR	3		N-Term(iTRAQ4plex)	1.386	0.844	0.935	4.06	2	684.358	1367.71	1.21	50.86
											kMYDIVTEGTYEIIAk	2		N-Term(iTRAQ4plex); K1(iTRAQ4plex); K16(iTRAQ4plex)	1.388	0.93	1.049	6.77	3	769.428	2306.27	1.3	54.03
											yGDDGAYR	1		N-Term(iTRAQ4plex)	1.328	1.133	1.294	2.67	2	530.744	1060.48	-1.16	18.69
O34969	yfjR	Uncharacterized oxidoreductase YfjR OS	21.33	1	4	4	8	1.036	1.096	1.585			O34969
											gQFFLAAPVLGRPDAAAk	2		N-Term(iTRAQ4plex); K18(iTRAQ4plex)	0.979	0.933	1.578	6.1	3	706.409	2117.21	0.99	46.6
											gFGDLDWAALIk	1		N-Term(iTRAQ4plex); K12(iTRAQ4plex)	1.063	0.988	1.701	4.63	2	797.451	1593.89	3.69	62.04
											tEDLVTEGAQAADTPR	1		N-Term(iTRAQ4plex)	1.163	1.392	1.298	5.44	2	909.454	1817.9	0.33	32.07
											iAVIGLGNMGQPIAR	4		N-Term(iTRAQ4plex)	1.233	1.47	1.914	4.85	2	827.484	1653.96	0.81	49.36
O34384	yceE	Uncharacterized protein YceE OS	22.4	1	3	4	19	1.13	1.338	1.829			O34384
											aVIGLGWDTNk	6		N-Term(iTRAQ4plex); K11(iTRAQ4plex)	1.084	1.222	1.866	4.46	2	731.42	1461.83	2.12	41.91
											vVDEETQNELLR	3		N-Term(iTRAQ4plex)	1.12	1.461	1.532	5.15	2	794.918	1588.83	-0.88	32.53
											iPAHIEk	2		N-Term(iTRAQ4plex); K7(iTRAQ4plex)	1.141	1.33	2.069	3.83	3	365.897	1095.68	0.48	24.38
											sQNFGQVSNAFVR	8		N-Term(iTRAQ4plex)	0.98	1.162	1.122	5.83	3	533.279	1597.82	1.97	38.58
P96705	ydgG	Uncharacterized HTH-type transcriptional regulator YdgG OS	10.53	1	1	1	2	1.602	1.616	1.853			P96705
											gPTSPGSLAMYQNVHk	2		N-Term(iTRAQ4plex); K16(iTRAQ4plex)	1.546	1.385	1.899	7.5	3	659.014	1975.03	-1.56	31.99
O35022	azoR1	FMN-dependent NADH-azoreductase 1 OS	37.5	1	9	9	25	1.006	1.857	2.657			O35022
											aGQGMEMTEDEkk	6		N-Term(iTRAQ4plex); K12(iTRAQ4plex); K13(iTRAQ4plex)	1.01	2.113	4.188	5.61	3	629.316	1885.93	-1.31	20.7
											gGVYSEGPMAALEMSLNFMk	4		N-Term(iTRAQ4plex); K20(iTRAQ4plex)	0.84	1.918	3.296	7.52	3	807.403	2420.19	1.49	77.41
											aGQGMEMTEDEk	2		N-Term(iTRAQ4plex); K12(iTRAQ4plex)	1.204	2.161	3.817	4.6	2	807.374	1613.74	1.55	23.84
											yTQEGPVGLMGGkk	1		N-Term(iTRAQ4plex); K13(iTRAQ4plex); K14(iTRAQ4plex)	0.795	1.844	3.847	6.3	3	633.023	1897.06	-1.26	32.13
											aGQGmEMTEDEkk	1		N-Term(iTRAQ4plex); M5(Oxidation); K12(iTRAQ4plex); K13(iTRAQ4plex)	1.219	2.11	3.507	4.3	3	634.648	1901.93	-0.87	14.21
											yLNQFVk	3		N-Term(iTRAQ4plex); K7(iTRAQ4plex)	1.129	2.486	2.931	3.12	2	600.354	1199.7	-1.83	38.59
											vALLNAR	2		N-Term(iTRAQ4plex)	0.979	2.132	2.761	2.72	2	450.791	900.575	0.14	30.93
											aGQGMEmTEDEkk	1		N-Term(iTRAQ4plex); M7(Oxidation); K12(iTRAQ4plex); K13(iTRAQ4plex)	1.538	2.151	4.47	3.4	3	634.649	1901.93	0.28	15.11
											yTQEGPVGLMGGk	3		N-Term(iTRAQ4plex); K13(iTRAQ4plex)	0.785	1.321	1.577	3.67	2	812.936	1624.86	2.03	35.68
											qAAIADkYLNQFVk	1		N-Term(iTRAQ4plex); K7(iTRAQ4plex); K14(iTRAQ4plex)	0.93	0.996	1.374	4.21	3	681.065	2041.18	-0.46	45.84
											lYEAFLAAYk	1		N-Term(iTRAQ4plex); K10(iTRAQ4plex)	1.029	2.596	2.482	4.16	2	738.923	1476.84	2.52	55.79
O31535	yetH	Uncharacterized protein YetH OS	40	1	3	3	5	0.968	1.301	1.867			O31535
											dEDGNVFLLkE	1		N-Term(iTRAQ4plex); K10(iTRAQ4plex)	1.088	1.347	2.221	4.36	2	783.917	1566.83	0.51	36.95
											vGFDIAADHPMGPEASWLEVAPk	2		N-Term(iTRAQ4plex); K23(iTRAQ4plex)	0.871	0.956	1.548	8.86	3	909.139	2725.4	4.5	53.4
											qIGTVAVYVEDQQk	2		N-Term(iTRAQ4plex); K14(iTRAQ4plex)	1.023	1.172	1.727	6.75	3	622.678	1866.02	-1.04	39.25
P37552	yabJ	Enamine/imine deaminase OS	44	1	3	3	12	0.875	1.069	1.388			P37552
											aTVFIADMEQFAEVNEVYGQYFDTHkPAR	2		N-Term(iTRAQ4plex); K26(iTRAQ4plex)				7.8	4	916.954	3664.8	-0.82	71.56
											eQTHQVFSNLk	4		N-Term(iTRAQ4plex); K11(iTRAQ4plex)	0.771	1.025	1.488	5.37	2	809.947	1618.89	4.32	27.89
											aVLEEAGASFETVVk	6		N-Term(iTRAQ4plex); K15(iTRAQ4plex)	0.885	1.176	1.644	5.89	3	613.344	1838.02	0.51	47.55
P94520	ysdB	Sigma-w pathway protein YsdB OS	12.31	1	2	2	2	0.924	0.836	1.32			P94520
											gVLFEGEk	1		N-Term(iTRAQ4plex); K8(iTRAQ4plex)	0.879	0.848	1.487	3.46	2	583.837	1166.67	-0.14	31.05
											dFENIEEk	1		N-Term(iTRAQ4plex); K8(iTRAQ4plex)	0.968	0.824	1.153	3.91	2	656.338	1311.67	0.79	27.7
P36948	rbsC	Ribose transport system permease protein RbsC OS	8.7	1	3	3	6	1.319	3.425	4.481			P36948
											mkTEQLQTEQk	3		N-Term(iTRAQ4plex); K2(iTRAQ4plex); K11(iTRAQ4plex)	1.55	4.907	6.411	4.22	3	599.338	1796	2.79	20.9
											aALISGIk	2		N-Term(iTRAQ4plex); K8(iTRAQ4plex)	1.223	2.554	4.104	3.5	2	530.852	1060.7	0.63	32.1
											iHFDGVMQk	1		N-Term(iTRAQ4plex); K9(iTRAQ4plex)	1.464	4.826	5.702	4.4	3	454.921	1362.75	3.93	34.12
P54569	yqkF	Uncharacterized oxidoreductase YqkF OS	33.99	1	7	7	11	1.302	1.419	1.881			P54569
											gLLTEkPLDQASESMk	3		N-Term(iTRAQ4plex); K6(iTRAQ4plex); K16(iTRAQ4plex)	1.42	1.827	3.128	5.29	2	1090.1	2179.2	0.21	37.97
											wDDGSEGWYWDPSk	1		N-Term(iTRAQ4plex); K14(iTRAQ4plex)	1.129	1.093	1.161	3.03	2	1008.45	2015.9	0.05	47.78
											yYGISSIRPNVIk	1		N-Term(iTRAQ4plex); K13(iTRAQ4plex)	1.321	1.933	2.455	3.42	3	600.02	1798.04	-0.89	41.53
											sLQYLLAQPAVASVITGASk	1		N-Term(iTRAQ4plex); K20(iTRAQ4plex)	1.335	1.079	0.977	4.89	3	769.118	2305.34	0.79	62.71
											rPEEWLPLLEEHQISVVAR	2		N-Term(iTRAQ4plex)	1.265	1.068	0.994	7.8	3	815.786	2445.34	2.81	53.64
											gRNEEIVGDAIQNR	1		N-Term(iTRAQ4plex)	0.992	1.67	1.636	4.4	2	857.955	1714.9	3.89	27.28
											rLTEEEIk	2		N-Term(iTRAQ4plex); K8(iTRAQ4plex)	1.343	1.391	1.891	4.3	3	435.925	1305.76	-0.48	23.47
O32119	yutI	Putative nitrogen fixation protein YutI OS	22.52	1	2	2	5	0.907	1.202	1.803			O32119
											aLLEEVPGVVEVEQVF	2		N-Term(iTRAQ4plex)	0.714	0.978	1.149	3.85	3	634.355	1901.05	5.66	76.29
											eQVQEVLDk	3		N-Term(iTRAQ4plex); K9(iTRAQ4plex)	0.786	1.165	2.075	4.54	2	688.388	1375.77	0.61	28.51
O34628	yvlB	Uncharacterized protein YvlB OS	28.77	1	6	6	10	1.229	0.867	1.119			O34628
											eMMFTSNQAHDQNITVFSESLTGAIk	1		N-Term(iTRAQ4plex); K26(iTRAQ4plex)	1.19	0.812	1.311	6.63	3	1063.19	3187.57	0.61	55.95
											lTAQEALTLIEk	2		N-Term(iTRAQ4plex); K12(iTRAQ4plex)	1.118	0.82	0.958	5.43	2	809.486	1617.97	-0.9	54.8
											sNLGTLSHELMDVEMLk	2		N-Term(iTRAQ4plex); K17(iTRAQ4plex)	1.216	1.021	1.143	7.13	3	735.724	2205.16	3.28	58.4
											eVDLDLNFGHAYDVQHIFQFk	1		N-Term(iTRAQ4plex); K21(iTRAQ4plex)	1.228	0.791	0.954	6.91	4	706.62	2823.46	7.68	60.05
											iTALSVHVHDEEEPFTTAk	3		N-Term(iTRAQ4plex); K19(iTRAQ4plex)	1.422	0.977	1.21	7.95	3	804.763	2412.27	3.69	39.31
											tNVTLYIPQk	1		N-Term(iTRAQ4plex); K10(iTRAQ4plex)	1.323	0.97	0.843	2.85	2	732.935	1464.86	-2.14	38.36
P35149	spoIVA	Stage IV sporulation protein A OS	4.07	1	1	1	1	1.262	1.125	1.398			P35149
											fVPNQAmSVHVSDGLDVNIR	1		N-Term(iTRAQ4plex); M7(Oxidation)	1.262	1.125	1.398	2.65	3	786.75	2358.23	15	54.88
O31779	ymcA	Uncharacterized protein YmcA OS	34.97	1	3	3	4	0.883	1.385	1.987			O31779
											iDALQEELEEIPVIQEFR	2		N-Term(iTRAQ4plex)	0.713	1.655	1.73	3.59	2	1158.12	2315.23	1.76	74.42
											aEAQINENDkVSTIVNQIk	1		N-Term(iTRAQ4plex); K10(iTRAQ4plex); K19(iTRAQ4plex)	0.761	1.073	1.79	5.25	3	849.478	2546.42	1.39	44.08
											mISETEEVDFFkR	1		N-Term(iTRAQ4plex); K12(iTRAQ4plex)	1.173	1.426	2.44	5.71	3	640.333	1918.98	0.72	46.05
P20964	obg	GTPase ObgE OS	53.74	1	15	15	33	1.094	0.658	0.792			P20964
											gGDVVFEVDEGLR	4		N-Term(iTRAQ4plex)	1.011	0.632	0.912	4.88	2	768.397	1535.79	2.38	42.99
											lTERPQIIVANk	2		N-Term(iTRAQ4plex); K12(iTRAQ4plex)	1.117	0.686	0.632	4.59	3	557.352	1670.04	12.6	30.95
											vPPGTVVTDDDTk	2		N-Term(iTRAQ4plex); K13(iTRAQ4plex)	1.192	0.71	0.951	3.83	3	544.629	1631.87	-0.91	25.44
											lTDDYPVFPISAVTR	1		N-Term(iTRAQ4plex)	1.07	0.75	0.476	3.96	2	919.496	1837.99	2.15	57.79
											sFVMADLPGLIEGAHQGVGLGHQFLR	2		N-Term(iTRAQ4plex)	0.885	0.581	0.525	7.67	4	724.14	2893.54	3.39	63.13
											mDMPEAAENLEAFk	1		N-Term(iTRAQ4plex); K14(iTRAQ4plex)	1.006	0.691	0.778	4.99	2	942.459	1883.91	-1.14	47.69
											iADYHFTTLVPNLGMVETDDGR	1		N-Term(iTRAQ4plex)	1.03	0.736	0.803	6.94	3	870.103	2608.3	4.59	54.7
											vMYTMENEEVPFNITR	1		N-Term(iTRAQ4plex)	1.006	0.581	0.547	5.16	2	1059.01	2117.02	2.28	52.48
											gMGVDEALR	2		N-Term(iTRAQ4plex)	1.05	0.904	0.979	3.45	2	546.285	1091.56	-0.09	27.03
											sTLLSVVSSAkPk	3		N-Term(iTRAQ4plex); K11(iTRAQ4plex); K13(iTRAQ4plex)	1.033	0.713	0.683	5	2	875.043	1749.08	-3.14	40.5
											dPDGVFVLSGDSLER	2		N-Term(iTRAQ4plex)	1.185	0.662	0.871	4.79	2	875.442	1749.88	-0.58	44.42
											yIVLELk	4		N-Term(iTRAQ4plex); K7(iTRAQ4plex)	0.996	0.587	0.749	3.05	2	583.374	1165.74	-2.75	46.37
											eLLFEVANQLENTPEFPLYDEEELTQNR	4		N-Term(iTRAQ4plex)				6.22	3	1175.59	3524.74	7.17	77.7
											qVIADLTEHGQR	2		N-Term(iTRAQ4plex)	1.032	0.584	0.649	5.58	3	504.275	1510.81	0.75	29.17
											vLADVGLVGFPSVGk	2		N-Term(iTRAQ4plex); K15(iTRAQ4plex)	1.051	0.724	1.112	3.7	3	582.686	1746.04	1.88	55.52
P39810	flgK	Flagellar hook-associated protein 1 OS	5.33	1	1	1	1	0.887	0.642	1.129			P39810
											qQMSAVSLDEEMTNMIQFQHAYNAAAR	1		N-Term(iTRAQ4plex)	0.887	0.642	1.129	4.81	3	1076.85	3228.53	8.65	58.86
O31656	ykrK	Uncharacterized protein YkrK OS	18.45	1	3	3	4	1.153	0.689	0.82			O31656
											sTAIQNWVk	1		N-Term(iTRAQ4plex); K9(iTRAQ4plex)	0.854	0.935	0.735	4.1	2	667.886	1334.76	-1.88	35.05
											aANHLEIPEFLTR	2		N-Term(iTRAQ4plex)	1.433	0.426	0.883	3.51	3	552.307	1654.9	0.98	46.71
											gQGEHSPLDILVQSANMSAEk	1		N-Term(iTRAQ4plex); K21(iTRAQ4plex)	0.886	0.974	0.799	6.57	3	833.763	2499.27	-0.18	51.62
P54565	yqkB	Uncharacterized protein YqkB OS	35.51	1	3	3	7	0.755	1.389	2.261			P54565
											qALQQAFDANPGkk	2		N-Term(iTRAQ4plex); K13(iTRAQ4plex); K14(iTRAQ4plex)	0.64	1.521	2.532	5.66	3	650.042	1948.11	7.62	28.29
											vFFDDQMTIDYNEk	1		N-Term(iTRAQ4plex); K14(iTRAQ4plex)	0.9	1.116	1.138	3.21	3	685.002	2052.99	3.64	46.82
											mNIHVTDAAk	4		N-Term(iTRAQ4plex); K10(iTRAQ4plex)	0.746	1.743	3.397	3.88	3	463.26	1387.76	2.83	26.43
P39575	galT	Galactose-1-phosphate uridylyltransferase OS	21.64	1	8	8	8	1.188	1.704	2.511			P39575
											eNVDLVIkEELGHVFAR	1		N-Term(iTRAQ4plex); K8(iTRAQ4plex)	1.517	2.591	3.535	5.07	4	564.822	2256.27	2.94	60.06
											rGDLYELDIVLR	1		N-Term(iTRAQ4plex)	1.003	1.064	0.657	5.26	3	535.974	1605.91	-0.43	49.93
											gEHEPMEISk	1		N-Term(iTRAQ4plex); K10(iTRAQ4plex)	0.966	1.427	2.369	3.98	2	722.873	1444.74	2.66	21.61
											lQGDEPGHVAEAADHIFR	1		N-Term(iTRAQ4plex)	1.144	1.967	2.195	5.76	4	527.267	2106.05	-1.43	39.59
											aGIAAYTGDTPHNTVTPIAR	1		N-Term(iTRAQ4plex)	1.332	1.537	2.742	7.98	3	724.054	2170.15	5.34	33.98
											kLISIWDR	1		N-Term(iTRAQ4plex); K1(iTRAQ4plex)	1.069	1.72	2.583	3.74	3	440.273	1318.8	-3.03	39.28
											eNIGLIEVMGLAILPGR	1		N-Term(iTRAQ4plex)		0.912	1.481	4.31	3	647.043	1939.12	-0.69	76.62
											tWQTYSDEk	1		N-Term(iTRAQ4plex); K9(iTRAQ4plex)	1.018	1.694	1.519	3.35	2	723.362	1445.72	0.7	27.59
Q45065	yneT	Uncharacterized protein YneT OS	62.22	1	4	4	6	1.02	1.248	1.924			Q45065
											eIDGPIDIVNVFR	3		N-Term(iTRAQ4plex)	1.042	1.154	1.897	4.89	2	815.953	1630.9	4.4	59.01
											rSEQLPGVAEEFLETDAPVFWAQQGLVNEEAYQMLk	1		N-Term(iTRAQ4plex); K36(iTRAQ4plex)				6.76	4	1103.57	4411.26	8.95	77.91
											iAVVGLSDRPDR	1		N-Term(iTRAQ4plex)	0.966	1.279	1.671	3.42	3	481.279	1441.82	-1.32	29.7
											aMQDAGYEIIPVNPTIDEALGVk	1		N-Term(iTRAQ4plex); K23(iTRAQ4plex)				4.19	3	911.485	2732.44	-0.72	63.19
P39142	pdp	Pyrimidine-nucleoside phosphorylase OS	46.88	1	14	14	41	1.011	1.4	2.039			P39142
											lPQAAYQIDVPAk	6		N-Term(iTRAQ4plex); K13(iTRAQ4plex)	0.829	1.46	2.388	4.14	2	851.492	1701.98	-1.07	40.63
											gEPLVTLYANR	4		N-Term(iTRAQ4plex)	0.981	1.307	1.907	4.21	2	688.887	1376.77	1.12	40.63
											aTkEDEIDLAVGIMLR	3		N-Term(iTRAQ4plex); K3(iTRAQ4plex)	0.88	1.752	3.587	6.13	3	688.055	2062.15	2.89	59.79
											dVTGTVNSIPLIASSIMSk	8		N-Term(iTRAQ4plex); K19(iTRAQ4plex)	0.963	2.786	2.818	4.22	3	741.086	2221.24	4.17	61.3
											kADTLDEAR	1		N-Term(iTRAQ4plex); K1(iTRAQ4plex)	0.931	1.482	2.421	3.74	3	436.245	1306.72	0.47	15.36
											vDkHSTGGVGDTTTLVLAPLVAALDVPVAk	3		N-Term(iTRAQ4plex); K3(iTRAQ4plex); K30(iTRAQ4plex)				5.99	4	844.989	3376.94	-1.86	65.5
											eAIDTLkGEGPEDLHELVLTLGSQMVVLAk	2		N-Term(iTRAQ4plex); K7(iTRAQ4plex); K30(iTRAQ4plex)				5.79	4	910.26	3638.02	2.18	78.77
											tGAGAFMk	1		N-Term(iTRAQ4plex); K8(iTRAQ4plex)	0.58	0.896	1.274	3.08	2	535.794	1070.58	-10.12	24.66
											tEEDAAELAk	1		N-Term(iTRAQ4plex); K10(iTRAQ4plex)	1.198	1.61	1.86	4.77	2	682.861	1364.71	-0.65	24.47
											vAVIGQSGNLTPADkk	2		N-Term(iTRAQ4plex); K15(iTRAQ4plex); K16(iTRAQ4plex)	0.986	2.089	3.025	7.74	3	677.408	2030.21	6.76	28.48
											mSGRGLGHTGGTIDk	1		N-Term(iTRAQ4plex); K15(iTRAQ4plex)	1.514	1.065	1.074	3.88	3	592.324	1774.96	6.29	39.72
											lEAIMGFHVELTkDEFIk	2		N-Term(iTRAQ4plex); K13(iTRAQ4plex); K18(iTRAQ4plex)	0.794	1.757	1.751	5.31	3	851.477	2552.42	-0.1	57.69
											akLEEVMk	5		N-Term(iTRAQ4plex); K2(iTRAQ4plex); K8(iTRAQ4plex)	1.148	1.302	2.605	3.55	3	460.616	1379.83	2.35	25.76
											gEGPEDLHELVLTLGSQMVVLAk	2		N-Term(iTRAQ4plex); K23(iTRAQ4plex)				5.9	3	908.502	2723.49	1.14	77.17
O31657	htpX	Protease HtpX homolog OS	18.12	1	6	6	21	0.957	1.682	2.476			O31657
											kHSLSYEEQQLVDR	4		N-Term(iTRAQ4plex); K1(iTRAQ4plex)	0.861	2.478	2.451	7.01	3	674.028	2020.07	-0.27	28.76
											iLEDDQTAVQTLk	5		N-Term(iTRAQ4plex); K13(iTRAQ4plex)	0.981	1.926	2.111	6.2	2	881.498	1761.99	2.55	35.07
											hSLSYEEQQLVDR	1		N-Term(iTRAQ4plex)	0.797	1.54	1.933	4.82	2	874.441	1747.88	1.28	33.55
											sPEVNAFATGPSk	8		N-Term(iTRAQ4plex); K13(iTRAQ4plex)	0.912	1.859	2.836	5.31	2	796.928	1592.85	-2.5	28.34
											sSLFSTHPDLDER	2		N-Term(iTRAQ4plex)	0.665	1.119	1.794	4.84	3	549.942	1647.81	1.41	35.4
											sPEVNAFATGPSkR	1		N-Term(iTRAQ4plex); K13(iTRAQ4plex)	0.952	1.588	3.819	6.52	3	583.655	1748.95	-1.12	25.32
P37538	yaaQ	Uncharacterized protein YaaQ OS	37.61	1	4	4	8	0.99	1.363	1.997			P37538
											sGNTTFMIGVEDIR	2		N-Term(iTRAQ4plex)	0.908	1.482	1.792	5.37	2	842.43	1683.85	1.73	48.36
											aLSLIk	2		N-Term(iTRAQ4plex); K6(iTRAQ4plex)	1.106	1.646	2.651	2.73	2	466.823	932.639	0.91	33.03
											tLTDHNFR	1		N-Term(iTRAQ4plex)	0.954	1.508	2.575	3.56	3	383.204	1147.6	1.11	21.58
											lIVAVVQDQDSNR	3		N-Term(iTRAQ4plex)	1.043	1.539	2.128	4.62	2	800.944	1600.88	1.71	35.44
P80864	tpx	Probable thiol peroxidase OS	61.68	1	9	9	38	1.026	1.566	2.187			P80864
											fNEEAAk	2		N-Term(iTRAQ4plex); K7(iTRAQ4plex)	0.875	1.356	1.331	2.94	2	548.798	1096.59	0.41	20.14
											dMSFGEAFGVYIk	3		N-Term(iTRAQ4plex); K13(iTRAQ4plex)	1.043	1.205	1.467	4.69	3	584.636	1751.89	1.27	58.45
											vGDQAPDFTVLTNSLEEk	3		N-Term(iTRAQ4plex); K18(iTRAQ4plex)	0.781	1.798	2.225	5.71	3	751.063	2251.17	2.18	50.1
											vVYAEYVSEATNHPNYEkPIEAAk	2		N-Term(iTRAQ4plex); K18(iTRAQ4plex); K24(iTRAQ4plex)	1.104	2.328	2.098	7.56	4	789.418	3154.65	2.65	43.41
											rFNEEAAk	1		N-Term(iTRAQ4plex); K8(iTRAQ4plex)	1.066	1.361	1.336	3.63	3	418.234	1252.69	-0.95	16.08
											lGDVNVYTISADLPFAQAR	8		N-Term(iTRAQ4plex)				6.55	3	732.062	2194.17	4.16	61.94
											dMSFGEAFGVYIkELR	1		N-Term(iTRAQ4plex); K13(iTRAQ4plex)	0.813	1.361	1.533	6.93	3	717.379	2150.12	1.4	64.35
											sLADMk	2		N-Term(iTRAQ4plex); K6(iTRAQ4plex)	1.109	1.715	3.219	2.75	2	476.772	952.538	-0.09	23.3
											gGPVTLVGQEVk	16		N-Term(iTRAQ4plex); K12(iTRAQ4plex)	1.227	1.764	3.074	5.56	2	736.438	1471.87	-2.53	32.32
P94428	gabD	Succinate-semialdehyde dehydrogenase [NADP(+)] OS	24.89	1	9	9	14	1.473	1.413	1.653			P94428
											kITFTGSTPVGk	2		N-Term(iTRAQ4plex); K1(iTRAQ4plex); K12(iTRAQ4plex)	1.39	1.665	1.962	6.49	3	556.674	1668.01	1.97	29.25
											iVSQIDDAVEk	1		N-Term(iTRAQ4plex); K11(iTRAQ4plex)	1.335	1.571	1.23	5.17	2	752.928	1504.85	1.2	35.33
											iTFTGSTPVGk	2		N-Term(iTRAQ4plex); K11(iTRAQ4plex)	1.406	1.392	1.22	3.55	2	698.407	1395.81	-0.78	33.12
											tIPQQSATEVEEAIER	1		N-Term(iTRAQ4plex)	1.387	1.455	1.248	4.8	2	973.005	1945	1.58	43.4
											eGGSEGIEPYLETk	1		N-Term(iTRAQ4plex); K14(iTRAQ4plex)	1.199	1.016	1.152	5.41	2	898.96	1796.91	-1.35	34.28
											wYELIVEHkEELADLITk	1		N-Term(iTRAQ4plex); K9(iTRAQ4plex); K18(iTRAQ4plex)	1.791	1.207	1.31	5.16	4	666.129	2661.49	2.86	68.06
											lIVHESIkDEFAAk	1		N-Term(iTRAQ4plex); K8(iTRAQ4plex); K14(iTRAQ4plex)	1.551	1.298	2.21	5.05	3	678.063	2032.18	-2.2	34.32
											lAYEAGIPk	3		N-Term(iTRAQ4plex); K9(iTRAQ4plex)	1.33	1.478	1.695	3.33	2	625.373	1249.74	-0.72	33.23
											qPVGPVAAITPWNFPNAMITR	2		N-Term(iTRAQ4plex)	2.603	1.647	3.9	6.01	3	808.773	2424.31	2.99	62.02
P94549	fadB	Probable enoyl-CoA hydratase OS	8.91	1	2	2	2	0.99	0.988	1.4			P94549
											eGIQAFLEk	1		N-Term(iTRAQ4plex); K9(iTRAQ4plex)	0.945	0.944	1.299	4.24	2	661.882	1322.76	0.95	45.57
											aLELIGSGEPISGk	1		N-Term(iTRAQ4plex); K14(iTRAQ4plex)	1.038	1.034	1.508	4.35	2	829.983	1658.96	0.62	42.29
Q03224	glpX	Fructose-1,6-bisphosphatase class 2 OS	30.53	1	9	9	18	1.208	1.599	2.065			Q03224
											gSVGTTESLVIR	6		N-Term(iTRAQ4plex)	1.171	1.377	2.514	4.25	2	681.889	1362.77	-0.66	33.94
											kkPNLVIRP	1		N-Term(iTRAQ4plex); K1(iTRAQ4plex); K2(iTRAQ4plex)	1.638	1.845	2.086	3.98	4	375.006	1497	2.05	26.67
											mEDLVk	1		N-Term(iTRAQ4plex); K6(iTRAQ4plex)	1.257	1.661	1.827	2.57	2	511.793	1022.58	-0.44	28.21
											dVFDTVPMk	1		N-Term(iTRAQ4plex); K9(iTRAQ4plex)	1.371	2.127	3.059	3.59	2	670.362	1339.72	0.4	36.43
											aLGGEIIGk	1		N-Term(iTRAQ4plex); K9(iTRAQ4plex)	1.178	1.513	2.149	3.89	2	573.36	1145.71	-0.83	32.63
											mGLDLSk	2		N-Term(iTRAQ4plex); K7(iTRAQ4plex)	1.06	1.504	1.779	2.67	2	526.306	1051.61	-0.6	32.46
											lLPQSEEEITR	2		N-Term(iTRAQ4plex)	1.188	1.683	1.958	3.87	2	729.9	1458.79	0.21	32.37
											nkDVEDVVATILNR	1		N-Term(iTRAQ4plex); K2(iTRAQ4plex)	1.291	2.031	1.883	5.45	3	625.36	1874.07	4.11	56.5
											gTVVIGEGEMDEAPMLYIGEk	3		N-Term(iTRAQ4plex); K21(iTRAQ4plex)	1.488	1.832	2.638	6.61	3	842.763	2526.27	1.32	52.24
O05520	moaC	Cyclic pyranopterin monophosphate synthase accessory protein OS	18.82	1	3	3	8	1.08	1.15	1.609			O05520
											aQMVDISEk	2		N-Term(iTRAQ4plex); K9(iTRAQ4plex)	1.042	1.022	1.318	3.83	2	654.858	1308.71	1.11	27.64
											ikEAEVILHIk	1		N-Term(iTRAQ4plex); K2(iTRAQ4plex); K11(iTRAQ4plex)	1.102	1.17	1.56	4.02	3	575.706	1725.1	1.2	41.83
											gMVIGPTFLLEk	5		N-Term(iTRAQ4plex); K12(iTRAQ4plex)	1.188	1.408	2.151	4.13	2	796.969	1592.93	-0.96	56.22
O34539	yjiC	Uncharacterized UDP-glucosyltransferase YjiC OS	4.59	1	2	2	2	1.275	1.086	1.359			O34539
											qSVPQLEVLEk	1		N-Term(iTRAQ4plex); K11(iTRAQ4plex)	1.229	1.194	1.423	4.1	2	779.457	1557.91	-1.86	40.4
											aYLEQEk	1		N-Term(iTRAQ4plex); K7(iTRAQ4plex)	1.321	0.988	1.298	3.06	2	584.827	1168.65	0.7	21.92
P37535	yaaN	Uncharacterized protein YaaN OS	8.29	1	2	2	3	1.285	1.489	2.249			P37535
											qITIQSAPQIR	2		N-Term(iTRAQ4plex)	1.209	1.426	1.976	3.67	2	699.914	1398.82	2.06	33.71
											kVQESLISTLEETLTIQEEGR	1		N-Term(iTRAQ4plex); K1(iTRAQ4plex)				3.6	3	897.828	2691.47	1.58	69.16
O31706	moaD	Molybdopterin synthase sulfur carrier subunit OS	32.47	1	1	1	1		1.848	3.186			O31706
											aSLkEQYGLESIDTAMIAVNESYVk	1		N-Term(iTRAQ4plex); K4(iTRAQ4plex); K25(iTRAQ4plex)		1.848	3.186	6.17	4	798.682	3191.7	5.37	61.05
P40924	pgk	Phosphoglycerate kinase OS	79.19	1	30	30	170	0.987	0.97	1.423			P40924
											ekGVNFYMPEDVLVADDFSNDANVk	1		N-Term(iTRAQ4plex); K2(iTRAQ4plex); K25(iTRAQ4plex)	1.006	0.916	0.494	4.37	3	1083.55	3248.62	2.6	52.84
											eLDVLGk	2		N-Term(iTRAQ4plex); K7(iTRAQ4plex)	1.094	0.985	1.353	3.13	2	531.326	1061.65	0.86	32.88
											vLLASHLGRPk	3		N-Term(iTRAQ4plex); K11(iTRAQ4plex)	1.116	1.33	1.991	4.48	3	493.653	1478.95	2.93	28.61
											fYPGEEk	1		N-Term(iTRAQ4plex); K7(iTRAQ4plex)	0.992	1.073	1.279	2.89	3	386.54	1157.61	-2.36	26.73
											aHASTAGIAEHLPAVAGFLMEk	17		N-Term(iTRAQ4plex); K22(iTRAQ4plex)	0.971	0.798	1.681	7.38	3	837.124	2509.36	4.44	55.01
											iVPISEIPSDLEAIDIGTk	9		N-Term(iTRAQ4plex); K19(iTRAQ4plex)	1.161	1.369	1.497	5.8	2	1149.66	2298.32	7.22	61.48
											aDEAYGDAVk	1		N-Term(iTRAQ4plex); K10(iTRAQ4plex)	0.9	0.934	1.371	4.4	2	663.841	1326.68	-2.19	22.51
											iGVIESLLDk	2		N-Term(iTRAQ4plex); K10(iTRAQ4plex)	0.744	0.924	0.896	4.36	2	687.928	1374.85	2.46	57.87
											kADEAYGDAVk	6		N-Term(iTRAQ4plex); K1(iTRAQ4plex); K11(iTRAQ4plex)	0.769	0.687	0.995	5.34	3	533.631	1598.88	2.1	19.83
											aALPTIk	5		N-Term(iTRAQ4plex); K7(iTRAQ4plex)	1.109	1.008	1.881	3.06	2	501.334	1001.66	0.19	28.21
											aLGYEVGk	8		N-Term(iTRAQ4plex); K8(iTRAQ4plex)	0.868	0.954	1.672	3.48	2	562.831	1124.65	-0.51	27.61
											vDFNVPMkDGEVTDDTR	5		N-Term(iTRAQ4plex); K8(iTRAQ4plex)	0.867	1.073	1.124	5.38	3	742.706	2226.1	3.05	34.54
											dGDVLVLENVR	7		N-Term(iTRAQ4plex)	1.075	1.015	1.183	4.45	2	686.883	1372.76	3	36.06
											mSHISTGGGASLEFMEGk	21		N-Term(iTRAQ4plex); K18(iTRAQ4plex)	0.692	1.167	1.754	8.82	3	709.688	2127.05	1.55	39.28
											aQISEMkDGDVLVLENVR	3		N-Term(iTRAQ4plex); K7(iTRAQ4plex)	1.184	0.99	1.766	5.75	2	1152.63	2304.25	3.12	46.45
											aHASTAGIAEHLPAVAGFLmEk	1		N-Term(iTRAQ4plex); M20(Oxidation); K22(iTRAQ4plex)	0.543	0.611	1.655	4.23	3	842.451	2525.34	-1.21	50.75
											eLPGVAALNDk	4		N-Term(iTRAQ4plex); K11(iTRAQ4plex)	1.096	1.148	1.631	4.28	2	707.91	1414.81	-0.75	37.06
											aQISEMk	7		N-Term(iTRAQ4plex); K7(iTRAQ4plex)	0.885	0.785	1.245	2.89	2	547.811	1094.62	3.15	21.12
											gEVVEELR	2		N-Term(iTRAQ4plex)	1.042	1.052	1.611	3.59	2	537.799	1074.59	0.14	28.73
											sLLEEDkIELAk	7		N-Term(iTRAQ4plex); K7(iTRAQ4plex); K12(iTRAQ4plex)	1.058	1.019	1.487	6.13	2	910.541	1820.07	-0.14	39.65
											aVAEALAEAk	6		N-Term(iTRAQ4plex); K10(iTRAQ4plex)	1.036	1.031	1.64	4.71	2	630.874	1260.74	1.11	34.25
											vDFNVPMk	6		N-Term(iTRAQ4plex); K8(iTRAQ4plex)	0.964	0.974	1.125	3.16	2	619.344	1237.68	-3.06	37.98
											eTYADVIk	3		N-Term(iTRAQ4plex); K8(iTRAQ4plex)	1.138	1.194	1.764	3.94	2	613.847	1226.69	0.17	31.25
											dTYSVIGGGDSAAAVEk	7		N-Term(iTRAQ4plex); K17(iTRAQ4plex)	1.214	1.272	1.895	7.39	3	643.333	1927.98	-0.46	31.67
											nDPELAk	2		N-Term(iTRAQ4plex); K7(iTRAQ4plex)	1.022	1.213	1.021	3.05	2	537.806	1074.6	0.63	15.49
											gVNFYMPEDVLVADDFSNDANVk	3		N-Term(iTRAQ4plex); K23(iTRAQ4plex)	0.838	0.958	1.404	4.51	2	1424.2	2847.39	5.66	58.88
											fYPGEEkNDPELAk	3		N-Term(iTRAQ4plex); K7(iTRAQ4plex); K14(iTRAQ4plex)	1.017	1.222	1.55	4.58	4	518.026	2069.08	-4.2	30.94
											aVSNPDRPFTAIIGGAk	13		N-Term(iTRAQ4plex); K17(iTRAQ4plex)	1.02	0.9	1.432	6.05	2	1001.57	2002.14	1.42	39.64
											vDNLIIGGGLAYTFVk	2		N-Term(iTRAQ4plex); K16(iTRAQ4plex)	0.958	1.188	1.188	4.71	3	656.72	1968.15	2.74	60.54
											aFAELADVYVNDAFGAAHR	8		N-Term(iTRAQ4plex)	1.021	0.904	1.598	7.32	3	727.703	2181.09	4.09	64.29
											lGELLGk	5		N-Term(iTRAQ4plex); K7(iTRAQ4plex)	1.102	1.315	1.213	2.99	2	509.331	1017.65	-0.82	37.2
P54517	yqhS	3-dehydroquinate dehydratase OS	18.24	1	2	2	5	0.905	1.552	2.294			P54517
											gQIVGLGAEGYkLAVR	1		N-Term(iTRAQ4plex); K12(iTRAQ4plex)	1.086	1.415	1.602	3.9	3	640.383	1919.14	1.79	43.04
											yLLSQQGGESR	4		N-Term(iTRAQ4plex)	0.765	1.743	2.644	3.45	2	691.362	1381.72	-1.38	25.32
P42415	iolD	3D-(3,5/4)-trihydroxycyclohexane-1,2-dione hydrolase OS	11.77	1	6	6	7	0.973	2.086	3.08			P42415
											lHGLLEGYESEFGTTIR	1		N-Term(iTRAQ4plex)	0.868	1.739	1.861	5.93	3	689.364	2066.08	5.25	53.95
											aFEVMTDPAk	1		N-Term(iTRAQ4plex); K10(iTRAQ4plex)	1.137	2.219	4.058	3.76	2	698.872	1396.74	-0.75	34.72
											iTRPEQLMSSLLR	2		N-Term(iTRAQ4plex)	0.863	2.482	3.062	4.09	3	563.328	1687.97	2.98	53.1
											nEQGMAHAAMAYSk	1		N-Term(iTRAQ4plex); K14(iTRAQ4plex)	1.057	2.15	2.363	4.18	3	599.628	1796.87	1.15	29.15
											kPVILVGGGAk	1		N-Term(iTRAQ4plex); K1(iTRAQ4plex); K11(iTRAQ4plex)	1.22	2.43	5.149	4.55	3	490.997	1470.98	1.94	27.45
											eLkDEWLAER	1		N-Term(iTRAQ4plex); K3(iTRAQ4plex)	1.283	2.368	4.48	3.57	3	526.291	1576.86	0.24	35.57
P23446	flgG	Flagellar basal-body rod protein FlgG OS	22.35	1	4	4	5	0.643	0.694	1.317			P23446
											iPTDAQSFSIGSDGk	1		N-Term(iTRAQ4plex); K15(iTRAQ4plex)	0.676	0.635	1.843	4.69	2	905.976	1810.94	0.86	35.65
											vSIVDAEGk	2		N-Term(iTRAQ4plex); K9(iTRAQ4plex)	0.664	0.767	1.625	3.67	2	603.352	1205.7	-0.89	26.91
											qIGLGSSSGTIDTIHSTSATQSTGR	1		N-Term(iTRAQ4plex)	0.703	0.742	0.879	6.3	3	869.446	2606.32	3.08	32.72
											sLYSGISGMk	1		N-Term(iTRAQ4plex); K10(iTRAQ4plex)	0.41	0.613	1.027	4.28	2	665.869	1330.73	1.58	36.41
P54169	ypgR	Uncharacterized protein YpgR OS	48.54	1	14	14	34	1.251	1.24	1.53			P54169
											aAMFLYEVGDESAIEALR	2		N-Term(iTRAQ4plex)	1.057	2.085	2.422	4.31	3	710.365	2129.08	4.26	62.74
											vFVQMFSGIPMQVk	3		N-Term(iTRAQ4plex); K14(iTRAQ4plex)	1.412	1.222	1.337	4.07	3	633.689	1899.05	2.63	60.21
											fGDFDEIGHDVTEELQAAYSDER	1		N-Term(iTRAQ4plex)	1.818	1.63	2.135	8.47	3	929.762	2787.27	7.47	68.2
											tAFGMESAESAEENR	1		N-Term(iTRAQ4plex)	1.299	1.351	1.208	6.19	2	886.899	1772.79	1.88	29.65
											vTLDMLDDEDWk	2		N-Term(iTRAQ4plex); K12(iTRAQ4plex)	1.431	1.435	1.571	5.21	2	884.442	1767.88	3.03	50.18
											sIEPTPSPNTMk	7		N-Term(iTRAQ4plex); K12(iTRAQ4plex)	1.226	1.15	1.569	3.96	2	795.427	1589.85	1.46	27.19
											lTEAAAQGk	1		N-Term(iTRAQ4plex); K9(iTRAQ4plex)	1.13	1.01	1.203	3.41	2	588.845	1176.68	-0.24	21.59
											qAVVYLGMIETPDVLPLLYk	1		N-Term(iTRAQ4plex); K20(iTRAQ4plex)	0.927	1.088	0.775	4.61	3	850.822	2550.45	0.81	76.42
											yAHLEQMDPkEEDIPVLQk	1		N-Term(iTRAQ4plex); K10(iTRAQ4plex); K19(iTRAQ4plex)	1.418	1.116	1.559	4.92	3	905.821	2715.45	3.31	42.58
											yAHLEQMDPk	2		N-Term(iTRAQ4plex); K10(iTRAQ4plex)	1.248	1.239	1.588	3.94	3	507.266	1519.78	0.97	28.04
											sEASNVVFER	1		N-Term(iTRAQ4plex)	1.328	1.249	1.409	4.49	2	641.331	1281.65	-1.36	26.89
											fQQAILk	2		N-Term(iTRAQ4plex); K7(iTRAQ4plex)	1.313	1.486	1.632	3.17	2	568.358	1135.71	0.46	32.11
											gVYHVADFLAVER	7		N-Term(iTRAQ4plex)	1.142	0.86	1.42	4.3	2	810.442	1619.88	6.55	44.93
											vILTEELPAGk	3		N-Term(iTRAQ4plex); K11(iTRAQ4plex)	1.306	1.194	1.705	4.6	2	729.443	1457.88	-1.71	39.33
P46905	yccK	Uncharacterized oxidoreductase YccK OS	4.84	1	1	1	1	0.933	1.455	2.133			P46905
											dkPQFQGETFIHNLk	1		N-Term(iTRAQ4plex); K2(iTRAQ4plex); K15(iTRAQ4plex)	0.933	1.455	2.133	4.65	4	559.315	2234.24	3.37	39.87
P42921	rplD	50S ribosomal protein L4 OS	43	1	7	7	40	1.201	0.848	1.07			P42921
											vIDNNIIVLEDLTLDTAk	4		N-Term(iTRAQ4plex); K18(iTRAQ4plex)	1.536	0.976	0.937	6.38	3	763.109	2287.31	5.7	64.75
											nIPGVTVVEANGINVLDVVNHEk	1		N-Term(iTRAQ4plex); K23(iTRAQ4plex)	1.069	0.744	0.582	8.77	3	906.844	2718.52	5.59	59.92
											gGGVVFGPTPR	13		N-Term(iTRAQ4plex)	1.235	0.837	1.278	4.1	2	594.336	1187.66	-0.66	29.48
											aLIVTADANEAVALSAR	11		N-Term(iTRAQ4plex)	0.801	0.989	1.148	6.22	3	610.349	1829.03	3.88	47.5
											aAVEkVEEVLA	3		N-Term(iTRAQ4plex); K5(iTRAQ4plex)	1.184	0.861	1.255	3.48	2	723.429	1445.85	3.26	43.44
											tkEMAAILk	3		N-Term(iTRAQ4plex); K2(iTRAQ4plex); K9(iTRAQ4plex)	1.549	1.179	1.337	4.99	3	479.633	1436.88	-1.69	30.45
											eMAAILk	5		N-Term(iTRAQ4plex); K7(iTRAQ4plex)	1.32	0.915	1.184	3.28	2	532.324	1063.64	-2.21	31.11
O31709	yknW	Uncharacterized protein YknW OS	13.42	1	2	2	4	0.641	1.293	2.104			O31709
											nSGTATEkPSLFGVITSPSVQFER	3		N-Term(iTRAQ4plex); K8(iTRAQ4plex)	0.567	1.205	2.176	6.85	3	947.507	2840.51	1.43	51.73
											mETNVEk	1		N-Term(iTRAQ4plex); K7(iTRAQ4plex)	0.747	1.348	2.204	3.21	2	569.804	1138.6	-1.12	17.22
P81101	frr	Ribosome-recycling factor OS	56.22	1	10	10	42	0.853	0.949	1.509			P81101
											eVLTQTk	4		N-Term(iTRAQ4plex); K7(iTRAQ4plex)	0.922	1.099	2.036	3.1	2	553.837	1106.67	0.86	18.85
											lTDEYVSk	3		N-Term(iTRAQ4plex); K8(iTRAQ4plex)	0.921	1.139	1.552	3.69	2	621.845	1242.68	0.33	28.88
											aSTEDVQk	1		N-Term(iTRAQ4plex); K8(iTRAQ4plex)	1.05	0.977	1.772	3.34	2	583.319	1165.63	-0.44	11.86
											aIAAYQR	1		N-Term(iTRAQ4plex)	0.811	0.899	1.732	2.56	2	468.774	936.54	1.65	20.49
											aNPSLLDk	5		N-Term(iTRAQ4plex); K8(iTRAQ4plex)	0.957	1.013	1.653	3.79	2	573.338	1145.67	-7.95	24.63
											aDLGLTPTSDGNMIR	5		N-Term(iTRAQ4plex)	0.875	0.956	1.436	5.35	2	852.941	1704.87	2.29	34.48
											iAIPALTEER	5		N-Term(iTRAQ4plex)	0.838	0.835	1.247	3.52	2	628.872	1256.74	2.39	41.69
											mLVITPYDk	10		N-Term(iTRAQ4plex); K9(iTRAQ4plex)	0.82	1.08	1.696	3.48	2	684.397	1367.79	1.43	41.44
											aDLGLTPTSDGNmIR	1		N-Term(iTRAQ4plex); M13(Oxidation)	0.897	0.825	1.399	2.7	2	860.936	1720.87	-0.31	30.96
											tAIGDIEk	2		N-Term(iTRAQ4plex); K8(iTRAQ4plex)	0.844	1.147	1.41	3.5	2	567.834	1134.66	-0.18	28.08
											vTVEYYGAQTPLNQLSSINVPEAR	5		N-Term(iTRAQ4plex)				4.7	3	931.822	2793.45	-0.7	47.93
Q45063	yneR	Uncharacterized protein YneR OS	35.79	1	3	3	4	0.923	1.103	1.657			Q45063
											eELDLESGDQVR	1		N-Term(iTRAQ4plex)	0.91	0.922	0.95	3.4	2	767.379	1533.75	0.18	30.04
											mNMTINEDALNWYkEELDLESGDQVR	1		N-Term(iTRAQ4plex); K14(iTRAQ4plex)	0.95	1.434	1.458	8.31	3	1134.55	3401.64	4.47	59.76
											gFSLGVAk	2		N-Term(iTRAQ4plex); K8(iTRAQ4plex)	0.92	1.059	2.128	3.77	2	533.829	1066.65	1.16	33.03
P42319	yxjH	Uncharacterized protein YxjH OS	6.37	2	2	2	2	1.286	1.43	1.725			P42319
											kDLQIVLGLITSk	1		N-Term(iTRAQ4plex); K1(iTRAQ4plex); K13(iTRAQ4plex)	1.952	1.467	1.426	3.6	3	620.738	1860.2	4.65	59.31
											aAGEMTAEQLR	1		N-Term(iTRAQ4plex)	0.619	1.394	2.024	4.5	2	660.838	1320.67	-1.04	24.75
P23479	sbcD	Nuclease SbcCD subunit D OS	3.07	1	1	1	1	1.205	1.107	1.416			P23479
											vADQLSLEEIHR	1		N-Term(iTRAQ4plex)	1.205	1.107	1.416	5.02	3	518.618	1553.84	-0.44	35.97
P37104	ylxM	UPF0122 protein YlxM OS	10.91	1	1	1	1	1.279	1.299	1.609			P37104
											rTEAMLEQYEEk	1		N-Term(iTRAQ4plex); K12(iTRAQ4plex)	1.279	1.299	1.609	5.64	3	605.645	1814.92	0.03	31.83
O34681	yjgD	Uncharacterized protein YjgD OS	6.45	1	1	1	1	0.657	0.831	1.484			O34681
											kADTEETANTLk	1		N-Term(iTRAQ4plex); K1(iTRAQ4plex); K12(iTRAQ4plex)	0.657	0.831	1.484	5.07	3	584.995	1752.97	-0.71	18.4
P39158	cspC	Cold shock protein CspC OS	59.09	1	5	5	16	0.216	0.817	1.864			P39158
											sLDEGQk	1		N-Term(iTRAQ4plex); K7(iTRAQ4plex)	0.158	0.876	2.054	2.78	2	532.795	1064.58	-0.64	11.72
											gAQAANVQk	2		N-Term(iTRAQ4plex); K9(iTRAQ4plex)	0.145	0.842	2.622	3.79	2	587.843	1174.68	0.62	13.75
											gFGFIER	4		N-Term(iTRAQ4plex)	0.239	0.757	1.65	2.75	2	485.266	969.525	-2.1	39.5
											wFNAEk	1		N-Term(iTRAQ4plex); K6(iTRAQ4plex)	0.153	1.035	1.829	2.55	2	541.799	1082.59	3.83	34.66
											vSFDVEQGAR	8		N-Term(iTRAQ4plex)	0.249	0.899	1.372	4.08	2	626.327	1251.65	0.71	30.03
P19465	folE	GTP cyclohydrolase 1 OS	47.37	1	10	10	25	0.877	1.177	1.849			P19465
											aEVLEHIk	6		N-Term(iTRAQ4plex); K8(iTRAQ4plex)	0.854	1.082	2.206	4.02	3	409.583	1226.73	-1.03	27.56
											eQIEQAVR	2		N-Term(iTRAQ4plex)	0.865	0.985	1.281	3.17	2	558.81	1116.61	0.19	19.52
											mYAEVFSGLNEDPkEHFQTIFGENHEELVLVk	1		N-Term(iTRAQ4plex); K14(iTRAQ4plex); K32(iTRAQ4plex)		0.977	0.803	5.32	5	837.23	4182.12	-0.78	63.04
											aEVLEHIkR	1		N-Term(iTRAQ4plex); K8(iTRAQ4plex)	0.82	1.293	2.507	2.83	3	461.618	1382.84	2.36	25.83
											eVNkEQIEQAVR	2		N-Term(iTRAQ4plex); K4(iTRAQ4plex)	0.867	1.317	2.164	4.96	2	865.986	1730.96	0.32	31.06
											aVEAVAk	1		N-Term(iTRAQ4plex); K7(iTRAQ4plex)	0.899	1.274	2.071	3.1	2	488.307	975.607	-0.71	17.26
											gVFkDDAAAR	3		N-Term(iTRAQ4plex); K4(iTRAQ4plex)	1.072	1.213	2.575	3.86	2	669.377	1337.75	3.74	20.4
											eHFQTIFGENHEELVLVk	2		N-Term(iTRAQ4plex); K18(iTRAQ4plex)	0.839	1.19	1.411	8.23	3	819.772	2457.3	0.31	46.91
											aHVAYIPR	5		N-Term(iTRAQ4plex)	0.892	1.174	2.279	3.6	3	357.546	1070.62	1.99	23.58
											qILEAIGEDPNR	2		N-Term(iTRAQ4plex)	0.862	1.171	1.241	4.23	2	749.904	1498.8	1.15	34.76
O07614	yhfO	Uncharacterized N-acetyltransferase YhfO OS	9.4	1	1	1	1	1.007	0.966	1.361			O07614
											iYILNDLFVVPHAR	1		N-Term(iTRAQ4plex)	1.007	0.966	1.361	3.82	3	605.352	1814.04	-1.03	62.09
P54394	dinG	Probable ATP-dependent helicase DinG homolog OS	4.94	1	3	3	3	1.272	0.843	1.006			P54394
											iLVLFTSHDMLk	1		N-Term(iTRAQ4plex); K12(iTRAQ4plex)	1.106	0.827	0.523	4.79	3	569.006	1705	3.51	56.62
											gkNPFQTVSLPEAVLTFR	1		N-Term(iTRAQ4plex); K2(iTRAQ4plex)	1.456	0.886	1.65	5.34	3	764.772	2292.3	3.03	58.98
											sIQDTGQPEFIQDTAR	1		N-Term(iTRAQ4plex)	1.254	0.816	0.846	4.38	2	975.49	1949.97	2.18	33.41
O34774	yobJ	Uncharacterized protein YobJ OS	15	1	4	4	6	1.061	1.141	1.555			O34774
											iLEPMYYSLk	3		N-Term(iTRAQ4plex); K10(iTRAQ4plex)	1.101	1.202	1.737	3.57	2	772.936	1544.87	1.19	50.17
											kDEISLFQEWFDk	1		N-Term(iTRAQ4plex); K1(iTRAQ4plex); K13(iTRAQ4plex)	1.213	1.214	1.664	6.08	3	706.383	2117.14	3.48	62.12
											fYSQSGETLEk	1		N-Term(iTRAQ4plex); K11(iTRAQ4plex)	1.012	1.174	1.413	4.75	2	788.909	1576.81	0.85	30.55
											fFEEYSGk	1		N-Term(iTRAQ4plex); K8(iTRAQ4plex)	1.141	1.044	1.079	3.07	2	647.831	1294.65	-0.65	36.5
P71047	ywgB	Putative HTH-type transcriptional regulator YwgB OS	15.38	1	1	1	2	0.969	0.859	1.271			P71047
											gGFTLTkPLADITLYDVYQAVEGR	2		N-Term(iTRAQ4plex); K7(iTRAQ4plex)	0.969	0.859	1.271	5.37	3	972.533	2915.58	2.87	75.22
P39778	clpY	ATP-dependent protease ATPase subunit ClpY OS	35.55	2	14	15	31	1.168	1.406	1.815			P39778
											nILMMGPTGVGk	3		N-Term(iTRAQ4plex); K12(iTRAQ4plex)	1.116	1.473	1.711	4.13	2	753.423	1505.84	-2.4	41.86
											iAEVAYHVNQDTDNIGAR	1		N-Term(iTRAQ4plex)	0.943	1.288	1.555	6.4	3	710.695	2130.07	-0.23	36.3
											dLVETSVR	1		N-Term(iTRAQ4plex)	1.109	1.051	1.574	2.81	2	531.799	1062.59	-1.34	23.66
											lTVDDFVR	1		N-Term(iTRAQ4plex)	1.131	1.239	1.71	3.39	2	554.809	1108.61	-0.72	39.85
											sLLDEk	1		N-Term(iTRAQ4plex); K6(iTRAQ4plex)	1.333	1.54	2.266	2.72	2	496.797	992.587	0.68	25.18
											dILPIVEGSTVVTk	1		N-Term(iTRAQ4plex); K14(iTRAQ4plex)	1.272	1.21	1.892	4.11	2	880.028	1759.05	2.29	45.26
											lSGAPFIk	1		N-Term(iTRAQ4plex); K8(iTRAQ4plex)	1.217	1.715	2.122	3.22	2	560.852	1120.7	0.38	36.9
											lIDMDEVGQEAVQR	5		N-Term(iTRAQ4plex)	1.263	1.397	1.868	6.12	3	582.965	1746.88	0.26	40.59
											vLTNEEASk	2		N-Term(iTRAQ4plex); K9(iTRAQ4plex)	1.237	1.385	1.311	4.38	2	639.86	1278.71	-0.66	19.05
											lLEDLSFEAPDVTMEk	1		N-Term(iTRAQ4plex); K16(iTRAQ4plex)	1.26	1.586	2.023	5.34	2	1063.06	2125.11	5.36	55.72
											fTEVGYVGR	2		N-Term(iTRAQ4plex)	1.045	1.277	1.712	3.8	2	586.315	1171.62	-0.92	33.78
											iTITPQYVEEk	2		N-Term(iTRAQ4plex); K11(iTRAQ4plex)	1.118	1.418	1.833	4.5	3	536.975	1608.91	0.91	38.16
											aEESGIIFIDEIDk	2		N-Term(iTRAQ4plex); K14(iTRAQ4plex)	1.362	1.56	2.207	6.22	2	934.004	1867	3.33	50.86
											iLVEPDNALLk	2		N-Term(iTRAQ4plex); K11(iTRAQ4plex)	1.256	1.285	1.846	4.61	2	756.966	1512.92	0.64	45.03
											lkDEVVPk	6		N-Term(iTRAQ4plex); K2(iTRAQ4plex); K8(iTRAQ4plex)	1.125	1.348	1.876	4.02	3	453.958	1359.86	0.93	26.11
P24281	yaaK	Nucleoid-associated protein YaaK OS	49.53	1	6	6	28	1.014	1.351	1.826			P24281
											vDEITNETMGQFTk	1		N-Term(iTRAQ4plex); K14(iTRAQ4plex)	0.934	1.531	1.491	5.72	2	950.983	1900.96	1	40
											aQEELAEk	4		N-Term(iTRAQ4plex); K8(iTRAQ4plex)	1.033	1.195	1.991	3.81	2	603.335	1205.66	1.45	17.93
											kVDEITNETMGQFTk	5		N-Term(iTRAQ4plex); K1(iTRAQ4plex); K15(iTRAQ4plex)	1.168	1.202	1.784	8.15	3	725.058	2173.16	2.86	39.86
											eILDVIIk	2		N-Term(iTRAQ4plex); K8(iTRAQ4plex)	1.066	1.128	1.566	3.76	2	615.9	1230.79	0.99	49.97
											gGMGNMQk	2		N-Term(iTRAQ4plex); K8(iTRAQ4plex)	0.735	1.003	2.026	2.99	2	555.785	1110.56	-0.3	17.96
											vVEGTAGGGMVTVk	13		N-Term(iTRAQ4plex); K14(iTRAQ4plex)	1.099	1.632	1.984	6.63	2	796.946	1592.88	-4.94	29.58
											kVDEITNETmGQFTk	1		N-Term(iTRAQ4plex); K1(iTRAQ4plex); M10(Oxidation); K15(iTRAQ4plex)	0.896	1.482	3.184	5.97	3	730.387	2189.15	-1.47	31.93
P42971	pbpC	Penicillin-binding protein 3 OS	19.31	1	11	11	13	1.127	0.715	0.936			P42971
											iYVPQTGEVIAEk	2		N-Term(iTRAQ4plex); K13(iTRAQ4plex)	1.159	0.738	0.816	4.29	2	867.997	1734.99	-0.41	40.31
											tAHLTGYVR	1		N-Term(iTRAQ4plex)	1.09	0.642	0.978	2.51	2	581.329	1161.65	0.85	23.61
											gSAYQPVVk	2		N-Term(iTRAQ4plex); K9(iTRAQ4plex)	1.127	0.556	0.991	4.13	2	618.863	1236.72	0.28	22.45
											aITAEELk	1		N-Term(iTRAQ4plex); K8(iTRAQ4plex)	1.261	0.733	0.965	3.82	2	581.849	1162.69	-1.27	28.35
											akDGEDLHLTIDIk	1		N-Term(iTRAQ4plex); K2(iTRAQ4plex); K14(iTRAQ4plex)	1.069	0.416	0.702	4.47	4	500.791	2000.14	1	37.2
											eGAADITk	1		N-Term(iTRAQ4plex); K8(iTRAQ4plex)	1.163	0.744	0.842	3.39	2	546.81	1092.61	-1.35	16.32
											dSSWGGYSVTR	1		N-Term(iTRAQ4plex)	1.29	0.83	1.048	3.29	2	679.827	1358.65	1.12	32.08
											kLDQGWVk	1		N-Term(iTRAQ4plex); K1(iTRAQ4plex); K8(iTRAQ4plex)	1.056	0.734	0.924	4.51	3	469.288	1405.85	-1.93	28
											gLAVNTDVPEIGIVPGELGDkk	1		N-Term(iTRAQ4plex); K21(iTRAQ4plex); K22(iTRAQ4plex)	0.819	0.764	0.777	6.63	3	885.174	2653.51	-2.5	49.5
											tYAPGSTIkPIAAAIGIk	1		N-Term(iTRAQ4plex); K9(iTRAQ4plex); K18(iTRAQ4plex)	1.118	0.73	0.632	4.23	3	735.451	2204.34	0.89	49.69
											aIYEQAGVk	1		N-Term(iTRAQ4plex); K9(iTRAQ4plex)	1.065	0.72	0.987	2.68	2	633.86	1266.71	-13.38	24.38
O32113	yutM	Uncharacterized protein YutM OS	25	1	3	3	8	0.836	1.477	2.101			O32113
											mSNPVTITEAAALHIk	2		N-Term(iTRAQ4plex); K16(iTRAQ4plex)	0.774	1.959	2.51	9.13	3	662.045	1984.12	3.58	49.78
											dMMkEHEEENAFLR	4		N-Term(iTRAQ4plex); K4(iTRAQ4plex)	0.855	2.273	4.064	5.14	4	517.503	2066.99	1.22	31.8
											eHEEENAFLR	2		N-Term(iTRAQ4plex)	0.934	1.151	1.471	6.09	3	473.232	1417.68	-0.7	24.6
P50740	fni	Isopentenyl-diphosphate delta-isomerase OS	5.44	1	2	2	3	0.892	1.064	1.645			P50740
											gVNTSSYSVR	2		N-Term(iTRAQ4plex)	0.903	0.986	1.797	3.32	2	607.318	1213.63	-0.43	22.59
											lIMTVLGAR	1		N-Term(iTRAQ4plex)	0.745	1.33	1.052	2.65	2	559.348	1117.69	0.09	51.25
P27876	tpiA	Triosephosphate isomerase OS	54.55	1	14	14	111	0.989	1.133	1.591			P27876
											tVAESFSQEAADkLR	2		N-Term(iTRAQ4plex); K13(iTRAQ4plex)	0.998	1.361	2.016	8.16	3	647.349	1940.03	0.57	42.41
											vGAQNmHFEESGAFTGEISPVALk	2		N-Term(iTRAQ4plex); M6(Oxidation); K24(iTRAQ4plex)	0.999	1.339	2.243	6.69	3	941.815	2823.43	3.21	45.22
											eAGkTNDLVADQVk	3		N-Term(iTRAQ4plex); K4(iTRAQ4plex); K14(iTRAQ4plex)	0.923	1.408	2.453	5.72	3	640.699	1920.08	2.5	25.04
											tVAESFSQEAADk	4		N-Term(iTRAQ4plex); K13(iTRAQ4plex)	0.936	1.24	1.264	5.75	2	835.928	1670.85	0.35	30.28
											gLAGLSEEQVAASVIAYEPIWAIGTGk	14		N-Term(iTRAQ4plex); K27(iTRAQ4plex)				5.89	3	1006.89	3018.65	3.9	75.16
											emFAETDETVNkk	1		N-Term(iTRAQ4plex); M2(Oxidation); K12(iTRAQ4plex); K13(iTRAQ4plex)	1.026	1.194	1.67	5.04	3	664.01	1990.01	-1.19	22.58
											vGAQNMHFEESGAFTGEISPVALk	34		N-Term(iTRAQ4plex); K24(iTRAQ4plex)	0.69	1.107	1.154	9.67	3	936.483	2807.43	2.48	48.52
											tNDLVADQVk	1		N-Term(iTRAQ4plex); K10(iTRAQ4plex)	0.875	1.106	0.972	4.23	2	695.893	1390.78	-0.22	25.49
											iQYGGSVkPANIk	9		N-Term(iTRAQ4plex); K8(iTRAQ4plex); K13(iTRAQ4plex)	0.882	1.137	1.631	5.7	4	452.527	1807.09	2.97	29.82
											tLGEAVSFVEEVk	5		N-Term(iTRAQ4plex); K13(iTRAQ4plex)	0.972	1.381	1.551	6.26	2	848.477	1695.95	3.99	54.02
											eMFAETDETVNk	5		N-Term(iTRAQ4plex); K12(iTRAQ4plex)	1.06	1.233	2.041	6.08	2	851.416	1701.82	0.11	30.02
											eMFAETDETVNkk	4		N-Term(iTRAQ4plex); K12(iTRAQ4plex); K13(iTRAQ4plex)	0.891	1.012	1.66	6.31	2	987.516	1974.02	1.27	28.37
											kGLAGLSEEQVAASVIAYEPIWAIGTGk	4		N-Term(iTRAQ4plex); K1(iTRAQ4plex); K28(iTRAQ4plex)				5.2	4	823.465	3290.84	0.57	66.69
											emFAETDETVNk	3		N-Term(iTRAQ4plex); M2(Oxidation); K12(iTRAQ4plex)	1.036	1.302	1.839	4.95	3	573.279	1717.82	1.25	25.78
											kTVAESFSQEAADk	7		N-Term(iTRAQ4plex); K1(iTRAQ4plex); K14(iTRAQ4plex)	1.017	1.082	1.725	6.95	3	648.354	1943.05	0.79	29.1
											kPIIAGNWk	10		N-Term(iTRAQ4plex); K1(iTRAQ4plex); K9(iTRAQ4plex)	1.16	1.266	2.922	5.4	3	486.979	1458.92	4.56	31.63
											sSIPAADk	3		N-Term(iTRAQ4plex); K8(iTRAQ4plex)	1.056	1.097	1.541	2.78	2	538.813	1076.62	0.04	18
P08821	hupA	DNA-binding protein HU 1 OS	83.7	2	8	8	103	0.873	1.235	1.805			P08821
											vPAFkPGk	4		N-Term(iTRAQ4plex); K5(iTRAQ4plex); K8(iTRAQ4plex)	0.906	1.312	2.849	2.75	2	638.41	1275.81	-1.11	25.77
											mNkTELINAVAEASELSk	9		N-Term(iTRAQ4plex); K3(iTRAQ4plex); K18(iTRAQ4plex)	1.002	1.362	1.915	7.09	3	794.11	2380.32	1.57	54.45
											iQLIGFGNFEVR	49		N-Term(iTRAQ4plex)	0.851	1.155	1.772	4.65	2	768.939	1536.87	3.17	59.04
											gRNPQTGEEIEIPASk	7		N-Term(iTRAQ4plex); K16(iTRAQ4plex)	1.026	1.135	2.082	5.84	3	672.033	2014.08	1.83	29.17
											aVDSVFDTILDALk	6		N-Term(iTRAQ4plex); K14(iTRAQ4plex)	0.875	1.319	2.054	6.84	2	898.014	1795.02	6.93	79.29
											nPQTGEEIEIPASk	11		N-Term(iTRAQ4plex); K14(iTRAQ4plex)	1.075	1.642	1.978	5.36	2	900.985	1800.96	2.01	29.33
											tELINAVAEASELSk	6		N-Term(iTRAQ4plex); K15(iTRAQ4plex)	0.817	1.733	1.354	6.68	3	621.684	1863.04	3.28	54.03
											aLkDAVAGk	11		N-Term(iTRAQ4plex); K3(iTRAQ4plex); K9(iTRAQ4plex)	1.066	1.438	3.981	4	2	652.916	1304.83	-0.86	21.6
P06224	sigA	RNA polymerase sigma factor RpoD OS	38.81	1	14	14	23	1.076	0.826	1.044			P06224
											eQLTESGk	2		N-Term(iTRAQ4plex); K8(iTRAQ4plex)	1.174	0.937	1.251	3.31	2	590.325	1179.64	-2.63	13.77
											fSTYATWWIR	1		N-Term(iTRAQ4plex)	1.189	0.837	0.733	3.07	2	737.884	1474.76	-0.03	59.45
											rGVLTYEEIAER	2		N-Term(iTRAQ4plex)	1.176	0.88	1.12	4.64	3	527.29	1579.86	0.36	35.18
											gMLFLDLIQEGNMGLMk	2		N-Term(iTRAQ4plex); K17(iTRAQ4plex)	1.468		1.392	3.09	3	733.395	2198.17	3.89	75.06
											tLEEVGk	1		N-Term(iTRAQ4plex); K7(iTRAQ4plex)	1.002	0.801	0.838	2.98	2	532.316	1063.62	0.51	21.2
											iPVHmVETINk	1		N-Term(iTRAQ4plex); M5(Oxidation); K11(iTRAQ4plex)	1.048	0.725	1.128	3.7	3	528.973	1584.91	2.25	29.74
											vNLLSAk	1		N-Term(iTRAQ4plex); K7(iTRAQ4plex)	0.989	0.666	0.715	2.85	2	516.837	1032.67	0.35	32.21
											qTHETELTFDQVk	1		N-Term(iTRAQ4plex); K13(iTRAQ4plex)	0.932	0.801	0.994	6.63	3	621.995	1863.97	0.91	30.62
											eQLEDVLDTLTDREENVLR	2		N-Term(iTRAQ4plex)	1.035	0.759	1.004	4.95	3	811.088	2431.25	2.36	59.62
											gVLTYEEIAER	2		N-Term(iTRAQ4plex)	1.118	0.823	1.222	4.67	2	712.383	1423.76	1.94	36.69
											qLLQDLGREPTPEEIAEDMDLTPEk	1		N-Term(iTRAQ4plex); K25(iTRAQ4plex)	0.942	0.963	0.703	8.77	3	1052.54	3155.61	3.28	58.39
											fGLDDGR	1		N-Term(iTRAQ4plex)	0.95	0.803	0.918	2.53	2	462.239	923.471	0.63	27.79
											iPVHMVETINk	3		N-Term(iTRAQ4plex); K11(iTRAQ4plex)	1.196	0.777	1.176	5.27	3	523.642	1568.91	2.11	36.42
											vNLLSAkEEIAYAQk	1		N-Term(iTRAQ4plex); K7(iTRAQ4plex); K15(iTRAQ4plex)	1.08	0.844	1.175	4.15	3	703.752	2109.24	6.82	45.46
											ePTPEEIAEDMDLTPEk	2		N-Term(iTRAQ4plex); K17(iTRAQ4plex)	0.864	0.681	0.848	4.99	2	1116.55	2232.1	5.59	50.31
P55339	ecsA	ABC-type transporter ATP-binding protein EcsA OS	17	1	5	5	8	1.136	1.257	1.702			P55339
											dAALDDLYLELTk	1		N-Term(iTRAQ4plex); K13(iTRAQ4plex)	1.176	1.094	1.237	3.31	3	589.995	1767.97	4.41	58.99
											rLPPLLk	1		N-Term(iTRAQ4plex); K7(iTRAQ4plex)	1.149	1.412	2.034	3.31	3	375.598	1124.78	3.78	33.56
											dLTGGYTR	3		N-Term(iTRAQ4plex)	1.012	1.266	1.458	2.73	2	513.77	1026.53	-0.28	22.32
											dAALDDLYLELTkEDAGHE	1		N-Term(iTRAQ4plex); K13(iTRAQ4plex)				2.86	4	602.305	2406.2	3.24	54.7
											wFPAHFSk	2		N-Term(iTRAQ4plex); K8(iTRAQ4plex)	1.1	1.098	1.832	3.37	3	436.575	1307.71	-2.42	39.87
P42973	bglA	Aryl-phospho-beta-D-glucosidase BglA OS	30.06	1	9	9	28	1.103	1.016	1.362			P42973
											gPSVVDVMTAGAHGVPR	3		N-Term(iTRAQ4plex)	1.218	1.067	1.931	7.77	3	598.653	1793.95	0.04	40.81
											dFLWGGALAAHQFEGGWNQGGk	9		N-Term(iTRAQ4plex); K22(iTRAQ4plex)	1.017	0.931	1.323	8	3	878.777	2634.32	2.76	56.93
											gDEAEPNEAGLQFYDDVFDELLk	1		N-Term(iTRAQ4plex); K23(iTRAQ4plex)				3.43	3	968.142	2902.41	7.94	75.79
											gYYPSYALk	3		N-Term(iTRAQ4plex); K9(iTRAQ4plex)	1.16	0.94	1.866	3.83	2	675.371	1349.73	-0.13	34.69
											tSIGWSR	1		N-Term(iTRAQ4plex)	0.968	0.942	1.084	2.44	2	475.762	950.517	-0.58	26.5
											yFFPDVQVR	3		N-Term(iTRAQ4plex)	1.071	1.014	1.125	3.01	2	657.854	1314.7	2.61	48.44
											hGIEPVITLSHFEMPLHLAR	4		N-Term(iTRAQ4plex)	0.907	1.131	1.141	7.79	4	611.088	2441.33	2.05	53.25
											ykEDIALFAEMGLk	2		N-Term(iTRAQ4plex); K2(iTRAQ4plex); K14(iTRAQ4plex)	1.05	1.244	1.39	4.42	2	1030.58	2060.15	4.15	57.42
											kITDTIEENEFYPNHEAIDFYHR	2		N-Term(iTRAQ4plex); K1(iTRAQ4plex)	1.16	0.571	0.842	8.38	4	793.143	3169.55	0.63	45.48
Q08352	ald	Alanine dehydrogenase OS	58.99	1	18	18	92	1.101	3.078	4.054			Q08352
											qVWDAEMVMk	2		N-Term(iTRAQ4plex); K10(iTRAQ4plex)	1.305	4.028	4.75	4.98	2	762.894	1524.78	1.2	44.14
											aPTLVTEEMVk	2		N-Term(iTRAQ4plex); K11(iTRAQ4plex)	1.018	3.706	6.243	4.74	2	753.428	1505.85	0.49	38.19
											aLQDESSVAGA	1		N-Term(iTRAQ4plex)	0.872	2.903	4.33	2.66	2	596.302	1191.6	-0.27	24.93
											tLPLLTPMSEVAGR	11		N-Term(iTRAQ4plex)	1.155	4.488	5.43	4.53	2	814.965	1628.92	4.14	53.7
											dkGVTAIAYETVSEGR	3		N-Term(iTRAQ4plex); K2(iTRAQ4plex)	2.198	3.591	3.987	6.27	3	662.026	1984.06	1.96	38.04
											aPTLVTEEmVk	1		N-Term(iTRAQ4plex); M9(Oxidation); K11(iTRAQ4plex)	1.026	2.627	4.642	3.28	2	761.424	1521.84	-2.19	30.83
											gVTAIAYETVSEGR	7		N-Term(iTRAQ4plex)	1.008	2.118	3.219	5.31	2	798.922	1596.84	0.68	42.44
											aLADNTALR	8		N-Term(iTRAQ4plex)	0.959	2.495	4.305	3.77	2	544.814	1088.62	1.8	24.89
											mAAQIGAQFLEkPk	7		N-Term(iTRAQ4plex); K12(iTRAQ4plex); K14(iTRAQ4plex)	1.239	5.225	5.154	7.22	3	655.385	1964.14	1.43	42.03
											vkEPLPEEYVYFR	7		N-Term(iTRAQ4plex); K2(iTRAQ4plex)	2.126	6.8	9.969	5.71	3	653.03	1957.07	3.42	45.16
											tSTIALTNVTVPYALQIANk	6		N-Term(iTRAQ4plex); K20(iTRAQ4plex)	1.21	0.934	1.13	6.31	3	802.804	2406.4	5.47	55.8
											gILLAGVPGVSR	9		N-Term(iTRAQ4plex)	1.426	3.844	8.739	3.89	2	641.902	1282.8	0.4	46.38
											qLDDIFGHQIk	9		N-Term(iTRAQ4plex); K11(iTRAQ4plex)	1.237	4.191	6.42	5.71	3	534.634	1601.89	-0.8	40.16
											vTIIGGGVVGTNAAk	2		N-Term(iTRAQ4plex); K15(iTRAQ4plex)	1.123	4.041	4.778	5.35	2	822.997	1644.99	-0.63	35.91
											vLVETGAGLGSGFENEAYESAGAEIIADPk	1		N-Term(iTRAQ4plex); K30(iTRAQ4plex)				2.63	3	1094.9	3282.68	4.89	62.88
											gkVTIIGGGVVGTNAAk	1		N-Term(iTRAQ4plex); K2(iTRAQ4plex); K17(iTRAQ4plex)	1.143	3.211	7.7	7.2	3	658.743	1974.21	3.34	32.25
											mIIGVPk	2		N-Term(iTRAQ4plex); K7(iTRAQ4plex)	1.142	2.927	4.229	2.83	2	523.337	1045.67	-2.2	35.39
											dLGYEYVPAEk	3		N-Term(iTRAQ4plex); K11(iTRAQ4plex)	1.116	3.348	4.891	4.03	2	786.413	1571.82	-0.05	36.81
											hGVVHYAVANMPGAVPR	10		N-Term(iTRAQ4plex)	0.771	2.498	2.85	6.85	3	640.345	1919.02	1.32	33.43
P39214	mcpA	Methyl-accepting chemotaxis protein McpA OS	13.01	2	5	8	16	0.602	0.912	1.632			P39214
											lVHQTVGQMNVIDk	1		N-Term(iTRAQ4plex); K14(iTRAQ4plex)	0.62	0.674	1.33	5.82	3	624.024	1870.06	6.23	34.95
											kVNIGTQGYAFIMTk	1		N-Term(iTRAQ4plex); K1(iTRAQ4plex); K15(iTRAQ4plex)	0.562	1.074	1.534	5.72	3	701.74	2103.21	3.07	45.24
											gFSVVAEEVR	2		N-Term(iTRAQ4plex)	0.636	0.85	1.737	4.24	2	618.839	1236.67	0.64	37.95
											lAVQSADSAk	7		N-Term(iTRAQ4plex); K10(iTRAQ4plex)	0.63	0.933	1.596	4.16	2	639.371	1277.74	4.12	20.86
											vVAHPNEQSGTELk	1		N-Term(iTRAQ4plex); K14(iTRAQ4plex)	0.521	0.941	1.807	5.93	3	599.665	1796.98	3.76	20.76
											dVESIYTSDTk	1		N-Term(iTRAQ4plex); K11(iTRAQ4plex)	0.66	0.961	1.915	4.21	2	773.398	1545.79	0.37	28.72
											kLAVQSADSAk	2		N-Term(iTRAQ4plex); K1(iTRAQ4plex); K11(iTRAQ4plex)	0.547	0.916	1.71	5.66	3	517.314	1549.93	0.78	19.66
											eIEGLIIEIVk	1		N-Term(iTRAQ4plex); K11(iTRAQ4plex)	0.645	0.909	1.574	3.93	2	772.485	1543.96	5.16	61.89
P54718	yfiB	Uncharacterized ABC transporter ATP-binding protein YfiB OS	1.57	1	1	1	1	1.202	1.669	2.225			P54718
											sTLFQLIPR	1		N-Term(iTRAQ4plex)	1.202	1.669	2.225	3.14	2	609.87	1218.73	0.6	55.12
P16616	hemC	Porphobilinogen deaminase OS	28.34	1	8	8	17	0.975	1.026	1.498			P16616
											eSDEELLALFSQFTDEYTk	3		N-Term(iTRAQ4plex); K19(iTRAQ4plex)	0.9	1.128	1.304	5.39	3	851.761	2553.27	7.71	76.47
											sAQLLIERPDLTIk	4		N-Term(iTRAQ4plex); K14(iTRAQ4plex)	1.003	1.079	1.401	4.36	3	629.051	1885.14	1.07	42.8
											eTVTGNDPEEVGkR	3		N-Term(iTRAQ4plex); K13(iTRAQ4plex)	0.831	0.902	1.21	4.83	2	909.977	1818.95	1.21	18.28
											qDVVTEFLEPER	1		N-Term(iTRAQ4plex)	0.944	1.227	1.507	4.69	2	803.421	1605.83	6.24	46.33
											eIEQALLNEEIDMAVHSMk	1		N-Term(iTRAQ4plex); K19(iTRAQ4plex)	1.353	1.248	1.252	7.97	3	830.094	2488.27	0.15	66.47
											gAVIGTSSLR	3		N-Term(iTRAQ4plex)	1.037	0.768	1.537	3.43	2	552.828	1104.65	-0.04	26.62
											kGAVIGTSSLR	1		N-Term(iTRAQ4plex); K1(iTRAQ4plex)	1.082	1.351	1.719	3.74	3	459.62	1376.85	0.22	24.18
											eTVTGNDPEEVGk	1		N-Term(iTRAQ4plex); K13(iTRAQ4plex)	0.695	0.881	1.042	2.75	2	831.925	1662.84	0.25	23.24
O35019	yfkK	UPF0435 protein YfkK OS	52.11	1	4	4	7	0.672	1.119	1.834			O35019
											aEDFSDEkIEDLTYLHR	2		N-Term(iTRAQ4plex); K8(iTRAQ4plex)	0.605	1.239	1.62	6.72	4	593.052	2369.19	0.32	44.13
											iEDLTYLHR	2		N-Term(iTRAQ4plex)	0.723	1.073	2.152	3.16	3	435.243	1303.71	0.81	34.47
											kESFSPSEMQAIAQELASLR	1		N-Term(iTRAQ4plex); K1(iTRAQ4plex)	0.546	1.172	1.556	7.65	3	837.446	2510.32	3.3	64.29
											eSFSPSEMQAIAQELASLR	2		N-Term(iTRAQ4plex)	0.611	1.045	1.744	6.89	2	1119.57	2238.14	7.67	68.14
O31766	ymfH	Uncharacterized zinc protease YmfH OS	34.11	1	11	11	23	1.259	1.358	1.678			O31766
											tYAVFTTk	3		N-Term(iTRAQ4plex); K8(iTRAQ4plex)	1.508	1.596	1.835	3.23	2	609.851	1218.69	-2.06	31.87
											eEVkEQEAVFR	1		N-Term(iTRAQ4plex); K4(iTRAQ4plex)	1.376	1.304	1.598	3.03	3	551.301	1651.89	-1.1	26.09
											tAYLFSSTSNVER	2		N-Term(iTRAQ4plex)	0.999	1.445	1.341	3.92	2	809.914	1618.82	0.62	37.24
											aLNSPEYIANQFTR	1		N-Term(iTRAQ4plex)	1.136	1.117	1.406	4.57	2	884.458	1767.91	-3.7	44.67
											lYFGVIENMYkEHPVR	1		N-Term(iTRAQ4plex); K11(iTRAQ4plex)	0.994	1.223	1.578	4.85	4	571.562	2283.23	2.99	53.22
											gIIGQEINMYDDNPDWR	1		N-Term(iTRAQ4plex)	1.25	1.182	1.537	5.94	2	1090.52	2180.02	2.28	50.12
											qGASANAFTSFTR	2		N-Term(iTRAQ4plex)	1.187	1.426	1.495	3.81	2	751.379	1501.75	-0.64	36.75
											mIkPIEYEQLQETLYHEk	3		N-Term(iTRAQ4plex); K3(iTRAQ4plex); K18(iTRAQ4plex)	1.869	1.567	2.114	8.75	3	908.833	2724.48	6.93	48.85
											nEMVHVPDGIAHFLEHk	3		N-Term(iTRAQ4plex); K17(iTRAQ4plex)	1.296	1.29	0.929	5.93	3	754.397	2261.18	1.69	49.23
											kPYTDQPEIk	5		N-Term(iTRAQ4plex); K1(iTRAQ4plex); K10(iTRAQ4plex)	1.285	1.299	2.2	4.75	3	550.985	1650.94	-1.18	24.39
											aGELITAEk	1		N-Term(iTRAQ4plex); K9(iTRAQ4plex)	1.375	1.371	1.792	3.8	2	610.359	1219.71	-1.7	26.41
P50736	ypdA	Uncharacterized protein YpdA OS	25.62	1	5	5	8	1.035	1.117	1.395			P50736
											gNEYSPSIkPWILPEFEALVR	1		N-Term(iTRAQ4plex); K9(iTRAQ4plex)	0.951	0.695	1.638	4.36	3	911.828	2733.47	-6.14	67.59
											iTENEVVFR	1		N-Term(iTRAQ4plex)	1.072	1.27	1.522	2.83	2	625.848	1250.69	1.89	35.87
											gNVVNSIYNYPTHQTFFSSSEk	1		N-Term(iTRAQ4plex); K22(iTRAQ4plex)	1.141	0.666	1.901	6.6	3	936.468	2807.39	0.17	45.52
[truncated: 8,268 more rows]

## Sheet: LTQ-Orbitrap_protein
Accession	Gene Symbol	Description	ΣCoverage	Σ# Proteins	Σ# Unique Peptides	Σ# Peptides	Σ# PSMs	20 min/control 115/114	115/114 Variability [%]	60 min/control 116/114	116/114 Variability [%]	120 min/control 117/114	117/114 Variability [%]	# AAs	MW [kDa]	calc. pI
O32200	liaG	Protein LiaG OS	4.48	1	1	1	1	5.84782		14.5347		33.1708		290	30.2436	6.31592
O32201	liaH	Protein LiaH OS	71.56	1	24	24	99	5.35625	65.7387	6.63174	80.9984	16.0691	68.9841	225	25.6821	6.59521
P46319	licA	Lichenan-specific phosphotransferase enzyme IIA component OS	46.36	1	5	5	18	1.14589	17.005	3.8526	48.811	14.6324	59.1286	110	12.177	4.86865
P94391	ycgN	1-pyrroline-5-carboxylate dehydrogenase 2 OS	31.84	1	11	11	20	0.708658	44.9027	5.93111	64.1951	12.5159	77.071	515	56.3886	5.69385
P46320	licH	Probable 6-phospho-beta-glucosidase OS	42.08	1	17	17	52	1.14993	21.4271	6.68668	83.8613	11.4806	77.997	442	48.6805	5.49072
P42106	qdoI	Quercetin 2,3-dioxygenase OS	52.23	1	12	12	37	8.12991	67.1428	14.6518	72.7365	10.9485	63.3488	337	37.5757	5.69385
O31820	yneN	Thioredoxin-like protein YneN OS	7.65	1	1	1	1	1.17719		2.24154		9.72715		170	19.36	7.88428
P36946	rbsD	D-ribose pyranase OS	61.83	1	6	6	31	1.63333	20.7193	4.25184	45.1774	8.08972	50.1461	131	14.2186	5.2749
O34949	ykoM	Uncharacterized HTH-type transcriptional regulator YkoM OS	63.64	1	8	8	12	1.32106	21.3882	3.75853	22.8081	8.02145	33.0485	154	17.8474	9.17334
P39120	citZ	Citrate synthase 2 OS	31.18	1	11	11	29	1.20096	17.446	3.98657	50.2572	7.64941	62.6601	372	41.7025	5.80811
P46318	licB	Lichenan-specific phosphotransferase enzyme IIB component OS	42.16	1	3	3	7	0.997301	9.37232	2.5587	39.972	7.58064	60.4071	102	10.9476	6.771
P39062	acsA	Acetyl-coenzyme A synthetase OS	17.48	1	8	8	10	0.999286	11.3137	4.17388	57.9686	6.6503	61.0352	572	64.8505	5.92236
P28368	yvyD	Putative sigma-54 modulation protein OS	35.98	1	6	6	15	1.07546	18.5618	1.87444	13.4017	6.57007	43.6704	189	21.9661	5.50342
O34660	dhaS	Putative aldehyde dehydrogenase DhaS OS	21.01	1	8	8	22	1.36535	13.9543	1.9436	35.9461	6.36984	44.7232	495	53.848	5.31299
P94440	yfiL	Uncharacterized ABC transporter ATP-binding protein YfiL OS	23.79	1	6	6	12	7.14552	67.3245	10.3846	73.977	6.14875	62.7636	311	34.029	7.15186
P32959	pbpE	Penicillin-binding protein 4* OS	6.65	1	2	2	2	1.53569		1.34793		6.10946		451	51.4046	5.12256
P45693	spoVS	Stage V sporulation protein S OS	38.37	1	2	2	19	1.0967	38.4195	2.59316	35.4343	6.10001	48.3733	86	8.79081	6.62451
P46317	licC	Lichenan permease IIC component OS	2.43	1	1	1	1	1.0809		2.07741		5.95575		452	48.5019	8.44092
P54423	wprA	Cell wall-associated protease OS	14.65	1	14	14	30	0.644823	36.5733	1.62938	19.7941	5.432	26.9813	894	96.428	9.20264
O34468	ylbP	Uncharacterized N-acetyltransferase YlbP OS	10.63	1	2	2	3	1.08257	17.5407	1.81944	5.44485	5.25762	1.29519	160	19.0265	7.23975
O31776	tdh	L-threonine 3-dehydrogenase OS	2.88	1	1	1	2	0.979043	19.1142	2.76184	67.0202	5.04352	56.6659	347	36.9729	6.52197
P94425	ycnE	Putative monooxygenase YcnE OS	89.47	1	9	9	28	1.25295	22.0546	2.63106	35.2364	5.01234	29.0632	95	10.9375	5.08447
O34743	ylbA	Uncharacterized protein YlbA OS	43.33	1	4	4	7	1.06723	33.3797	2.19467	78.8775	4.99766	70.7235	120	13.4849	5.24951
O32076	yuaG	Uncharacterized protein YuaG OS	15.32	1	7	7	11	0.836113	12.4442	1.21894	14.4612	4.95716	46.9542	509	55.9592	5.37646
O32075	yuaI	Uncharacterized N-acetyltransferase YuaI OS	7.51	1	1	1	1	0.67379		1.22019		4.8795		173	19.8302	5.42725
P24141	oppA	Oligopeptide-binding protein OppA OS	38.35	2	19	19	61	0.759846	12.8871	3.59453	34.4313	4.82946	34.3075	545	61.4858	5.80811
P42418	iolH	Protein IolH OS	23.88	1	5	5	8	0.93555	12.6076	2.14675	34.2396	4.80213	41.1592	289	33.5028	5.32568
P36949	rbsB	D-ribose-binding protein OS	37.38	1	14	14	41	1.20693	19.5702	3.10774	39.7578	4.75363	42.3613	305	32.207	6.58057
C0SPB1	yukJ	Uncharacterized protein YukJ OS	8	1	2	2	3	0.996702	12.18	1.89894	40.3368	4.62528	63.9596	225	25.538	4.79248
P42412	iolA	Methylmalonate semialdehyde dehydrogenase [acylating] OS	13.76	1	6	6	10	1.2374	12.8253	2.40572	31.5933	4.57723	44.8364	487	53.4193	5.42725
P09339	citB	Aconitate hydratase OS	33.22	1	25	25	63	1.13847	15.7199	3.93553	25.9996	4.56059	26.1007	909	99.2718	5.19873
P28015	spoVG	Putative septation protein SpoVG OS	42.27	1	4	4	16	0.95886	7.668	1.50793	18.4281	4.49262	18.3656	97	10.8865	5.46533
P36948	rbsC	Ribose transport system permease protein RbsC OS	8.7	1	3	3	6	1.31866	17.3881	3.42535	48.2908	4.48146	43.6426	322	33.7659	9.94971
O34683	hisB	Imidazoleglycerol-phosphate dehydratase OS	19.07	1	3	3	4	0.821873	10.0429	2.26284	41.561	4.47646	34.6144	194	21.535	6.04932
O34520	hisG	ATP phosphoribosyltransferase OS	9.86	1	2	2	3	0.969995	37.2394	2.64752	60.3699	4.47164	59.5851	213	23.6062	4.81787
O34968	yerB	Putative lipoprotein YerB OS	4.53	1	1	1	1	1.08371		2.09605		4.43362		331	36.9459	8.17725
O07603	yhfE	Putative aminopeptidase YhfE OS	30.35	1	8	8	14	1.42749	9.57657	1.40755	22.7128	4.42783	25.0937	346	38.7116	6.354
O32078	yuaE	Uncharacterized protein YuaE OS	66.67	1	9	9	23	0.854611	8.87551	2.03611	12.6931	4.42471	28.9764	162	19.099	6.65381
P94424	nfrA2	FMN reductase [NAD(P)H] OS	23.69	1	5	5	12	1.40865	12.2786	2.69783	21.7763	4.41568	28.8109	249	27.8503	5.36377
P42414	iolC	5-dehydro-2-deoxygluconokinase OS	2.15	1	1	1	1	1.24146		2.13809		4.30379		325	35.6097	5.07178
C0H3Z2	yjzH	Uncharacterized protein YjzH OS	23.44	1	1	1	1	2.07588		1.11478		4.21419		64	7.73289	7.25439
O31777	kbl	8-amino-7-oxononanoate synthase 1 OS	10.2	1	3	3	4	0.913748	56.4969	2.32645	50.5185	4.09807	86.7067	392	43.2565	6.72705
P80886	sucC	Succinyl-CoA ligase [ADP-forming] subunit beta OS	55.32	1	22	22	77	1.11116	11.3736	3.25918	28.9011	4.07431	25.2827	385	41.3455	5.12256
P96729	ywsB	Cell wall-binding protein YwsB OS	14.61	1	2	2	3	1.41162	20.3822	4.23525	57.5033	4.05809	57.7075	178	19.0968	9.51025
Q08352	ald	Alanine dehydrogenase OS	58.99	1	18	18	92	1.10141	9.31456	3.07798	29.0337	4.0538	22.8404	378	39.6588	5.43994
O32065	ytzB	Uncharacterized protein YtzB OS	26.67	1	2	2	4	1.29684	10.0861	1.91862	17.2495	3.99856	23.285	105	11.6591	8.11865
P31103	ndk	Nucleoside diphosphate kinase OS	51.01	1	9	9	44	1.33604	10.7349	2.65573	21.223	3.99851	17.0224	149	16.9476	5.89697
O34934	ppnK2	Probable inorganic polyphosphate/ATP-NAD kinase 2 OS	21.35	1	4	4	13	1.30245	22.9849	2.18862	54.2092	3.89969	54.608	267	30.2344	6.94678
P14949	trxA	Thioredoxin OS	63.46	1	6	6	53	0.828742	5.53931	1.86286	20.7916	3.8554	22.3522	104	11.3858	4.60205
P54155	msrB	Peptide methionine sulfoxide reductase MsrB OS	16.78	1	2	2	7	0.98549	6.922	1.60697	11.3543	3.81882	28.2531	143	16.5911	6.27783
O31684	ykvS	Uncharacterized protein YkvS OS	34.43	1	2	2	5	0.915057	13.7077	1.62453	7.54437	3.81481	29.6191	61	6.95165	5.97314
O31785	pksS	Polyketide biosynthesis cytochrome P450 PksS OS	8.64	2	3	3	4	1.23582	19.0131	2.24739	25.1819	3.78636	7.31488	405	46.6991	6.93213
O31601	yjbC	Putative acetyltransferase YjbC OS	8.33	1	2	2	2	0.864879	14.7886	1.33551	4.36407	3.7343	0.662041	192	23.1055	5.42725
P46913	qcrC	Menaquinol-cytochrome c reductase cytochrome b/c subunit OS	4.71	1	1	1	1	1.08499		1.68069		3.68601		255	28.1435	7.43018
Q45582	murQ	N-acetylmuramic acid 6-phosphate etherase OS	3.62	1	1	1	1	0.998772		3.55749		3.67696		304	32.6795	5.78271
O34377	yobM	Uncharacterized protein YobM OS	9.19	2	1	2	2	1.56175		2.03009		3.64832		185	21.6416	4.58936
O32174	gcvH	Glycine cleavage system H protein OS	55.91	1	5	5	18	1.07859	26.0943	1.64363	11.1101	3.64524	56.0541	127	14.2449	4.15771
P39138	rocF	Arginase OS	29.39	1	6	6	11	0.98471	21.3917	1.28758	19.1287	3.6177	33.2832	296	32.1335	5.24951
P26935	iolG	Inositol 2-dehydrogenase/D-chiro-inositol 3-dehydrogenase OS	9.3	1	3	3	5	0.995798	5.54312	2.19492	61.5969	3.61286	64.6109	344	38.3265	5.17334
P54390	ypiB	UPF0302 protein YpiB OS	5.03	1	1	1	1	1.0893		1.75395		3.57475		179	21.3507	6.34131
P94441	yfiM	Putative transport permease YfiM OS	13.13	1	4	4	6	2.65668	40.5992	4.4093	43.2188	3.57321	54.2385	396	43.0859	9.23193
P37532	yaaI	Uncharacterized isochorismatase family protein YaaI OS	11.6	1	1	1	1	1.09509		1.73657		3.54413		181	20.7955	4.97021
P39126	icd	Isocitrate dehydrogenase [NADP] OS	44.21	1	20	20	71	1.10043	7.27895	3.05647	25.2183	3.53045	26.1369	423	46.3889	5.09717
O31404	acoA	Acetoin:2,6-dichlorophenolindophenol oxidoreductase subunit alpha OS	22.52	1	6	6	11	0.799681	16.0235	15.0318	57.5596	3.52724	44.7327	333	36.0455	5.21143
P54551	yqjN	Uncharacterized protein YqjN OS	3.84	1	1	1	1	1.93788		2.33761		3.52078		547	61.8145	5.47803
P94551	etfA	Electron transfer flavoprotein subunit alpha OS	10.77	1	2	2	3	1.17974	19.7159	1.80458	3.29849	3.5099	14.3383	325	34.5199	4.98291
O34759	ydjO	Uncharacterized protein YdjO OS	17.39	1	1	1	2	0.602505	16.7079	1.06998	16.4572	3.49419	0.0264822	69	7.84167	7.75244
P39634	rocA	1-pyrroline-5-carboxylate dehydrogenase OS	5.44	1	2	2	2	1.14313	25.5017	1.40929	27.097	3.48767	68.6466	515	56.2846	5.97314
P36947	rbsA	Ribose import ATP-binding protein RbsA OS	33.87	1	16	16	37	1.44735	24.0875	3.02007	37.4827	3.47751	41.4825	493	54.4975	6.62451
P23451	fliK	Probable flagellar hook-length control protein OS	4.72	1	2	2	2	0.780195	18.8769	1.17634	17.1587	3.4218	31.3635	487	53.4998	4.94482
P96603	dctA	C4-dicarboxylate transport protein OS	2.14	1	1	1	1	0.688076		2.84588		3.40566		421	45.4114	8.51416
P40768	ytkA	Uncharacterized protein YtkA OS	14.48	1	1	1	1			1.27322		3.39298		145	15.8467	5.0083
P80865	sucD	Succinyl-CoA ligase [ADP-forming] subunit alpha OS	33	1	6	6	21	1.12345	11.9915	2.72567	37.6459	3.38485	44.3944	300	31.3621	5.97314
Q795U4	ytkL	UPF0173 metal-dependent hydrolase YtkL OS	81.94	1	10	10	35	1.16829	11.5653	1.75715	19.158	3.32893	21.2309	227	24.8156	5.38916
P94550	etfB	Electron transfer flavoprotein subunit beta OS	26.07	1	5	5	5	1.46325	16.7925	2.18109	31.4356	3.32524	13.3314	257	28.4997	4.48779
O34459	hisZ	ATP phosphoribosyltransferase regulatory subunit OS	9.46	1	3	3	3	1.17743	15.2881	2.36189	34.0249	3.32212	33.8615	391	43.4774	5.45264
P16263	odhB	Dihydrolipoyllysine-residue succinyltransferase component of 2-oxoglutarate dehydrogenase complex OS	54.44	1	18	18	68	1.18045	5.45293	2.50843	16.6744	3.30313	24.8767	417	45.9749	5.09717
O31501	swrC	Swarming motility protein SwrC OS	20.63	1	22	22	55	1.48807	18.0662	2.30763	27.2322	3.24585	26.0959	1052	113.435	5.08447
O31706	moaD	Molybdopterin synthase sulfur carrier subunit OS	32.47	1	1	1	1			1.84823		3.18637		77	8.09907	4.13232
P81102	yodC	Putative NAD(P)H nitroreductase YodC OS	49.5	1	8	8	28	1.28072	22.4571	1.65135	24.1537	3.1797	30.4416	202	22.3264	5.59229
P54173	ypjQ	Uncharacterized protein YpjQ OS	28.25	1	3	3	5	0.987599	12.9633	1.4765	28.5486	3.17018	3.41595	177	19.8894	4.80518
P50848	ypwA	Putative metalloprotease YpwA OS	46.31	1	24	24	46	1.27122	12.3212	1.5099	16.515	3.15971	27.693	501	58.1383	5.05908
O34912	hisI	Histidine biosynthesis bifunctional protein HisIE OS	4.31	1	1	1	1	1.00004		2.09578		3.113		209	23.886	4.88135
Q45577	ybeC	Probable amino acid-proton symporter YbeC OS	1.48	1	1	1	1	0.876835		1.46502		3.10551		539	59.1732	9.5542
P40739	bglP	PTS system beta-glucoside-specific EIIBCA component OS	14.29	1	8	8	10	1.1077	8.34928	0.753364	29.5829	3.09825	32.2459	609	64.4371	6.90283
O05522	tatAy	Sec-independent protein translocase protein TatAy OS	28.07	1	2	2	3	0.935433	11.884	1.48991	18.4981	3.08843	45.087	57	6.06132	6.66846
P54617	ydjF	Phage shock protein A homolog OS	58.59	1	11	11	33	0.763751	12.6517	1.21918	19.6007	3.08837	26.3159	227	25.1254	6.15088
Q07867	ftsL	Cell division protein FtsL OS	8.55	1	1	1	1	0.722816		1.40632		3.08311		117	13.0653	9.62744
P42415	iolD	3D-(3,5/4)-trihydroxycyclohexane-1,2-dione hydrolase OS	11.77	1	6	6	7	0.972989	23.8614	2.08643	20.0851	3.08039	44.435	637	70.3355	5.43994
P49814	mdh	Malate dehydrogenase OS	56.73	1	12	12	71	1.1824	13.4438	2.17644	22.9562	3.05915	24.0151	312	33.6226	5.021
P36945	rbsK	Ribokinase OS	47.44	1	8	8	24	1.62617	18.392	2.95833	24.5083	3.02923	21.0089	293	31.1187	4.90674
O07607	yhfI	Uncharacterized protein YhfI OS	52.87	1	7	7	23	0.950028	20.1214	1.51658	30.0453	3.01219	30.8925	244	26.5081	6.07471
P24137	oppF	Oligopeptide transport ATP-binding protein OppF OS	16.07	3	4	4	5	0.79866	29.2661	2.7524	24.9596	2.99581	12.4812	305	34.726	7.35693
P42413	iolB	5-deoxy-glucuronate isomerase OS	11.07	1	2	2	3	0.933473	9.39598	1.40185	32.8011	2.98666	50.4637	271	30.6871	5.07178
O34308	ytkK	Putative oxidoreductase YtkK OS	9.8	1	2	2	3	1.21422	3.8738	1.5506	8.55852	2.96947	60.7052	255	27.9565	7.37158
O31796	hfq	Protein hfq OS	20.55	1	1	1	1	1.14965		2.06661		2.96396		73	8.50851	8.49951
P54576	mcpC	Methyl-accepting chemotaxis protein McpC OS	5.34	1	2	2	2	1.01295	24.9737	1.23496	20.6118	2.95745	41.5065	655	71.986	5.16064
P06628	spo0F	Sporulation initiation phosphotransferase F OS	23.39	1	2	2	2	0.78514	2.43723	1.74889	2.67676	2.92817	15.6943	124	14.2185	5.03369
O06976	crh	HPr-like protein Crh OS	10.59	1	1	1	1	0.910716		1.93566		2.92489		85	9.32088	4.93213
P42405	hxlA	3-hexulose-6-phosphate synthase OS	38.57	1	7	7	35	0.617821	30.05	1.44933	10.3538	2.91967	21.5817	210	22.5581	4.86865
P19669	tal	Transaldolase OS	86.32	1	19	19	121	1.07866	9.2794	1.51895	15.3956	2.80081	20.0448	212	22.9573	6.15088
P94521	ysdC	Putative aminopeptidase YsdC OS	34.07	1	11	11	35	1.08489	21.2321	1.72209	25.0381	2.80077	24.8119	361	39.1923	5.96045
P51785	ilvD	Dihydroxy-acid dehydratase OS	15.05	1	5	5	9	0.791292	36.6049	1.5694	17.6547	2.75632	55.1917	558	59.4624	5.57959
P94442	yfiN	Putative transport permease YfiN OS	8.31	1	3	3	6	2.02404	42.3772	3.15988	59.5952	2.74184	51.6157	385	42.0563	8.98291
O07597	dat	D-alanine aminotransferase OS	13.12	1	3	3	4	1.07243	8.07495	1.6939	32.1903	2.73372	34.2425	282	31.1632	5.12256
O06724	yisK	Uncharacterized protein YisK OS	18.6	1	3	3	4	1.14661	24.2127	1.77811	41.1188	2.71206	46.5205	301	33.125	5.8335
P38021	rocD	Ornithine aminotransferase OS	4.74	1	2	2	4	0.908397	15.8441	1.05667	11.8414	2.69803	48.4097	401	43.7343	5.16064
P54375	sodA	Superoxide dismutase [Mn] OS	67.82	1	9	9	108	1.1125	12.6329	1.59415	14.6794	2.68921	27.3846	202	22.4761	5.36377
P96602	dctR	Probable C4-dicarboxylate response regulator DctR OS	6.64	1	1	1	1	1.00816		1.86183		2.68875		226	25.5227	8.41162
O35022	azoR1	FMN-dependent NADH-azoreductase 1 OS	37.5	1	9	9	25	1.00618	13.2418	1.85695	24.0166	2.65744	35.0273	208	22.9626	5.2876
P70994	ywhB	2-hydroxymuconate tautomerase OS	14.52	1	1	1	3	1.09916	2.52215	1.51368	2.34637	2.64828	5.9364	62	7.14064	5.45264
P94558	ysnA	Non-canonical purine NTP pyrophosphatase OS	40.91	1	6	6	11	1.28673	18.2203	1.4023	13.446	2.64383	15.783	198	21.9192	5.19873
O31602	spxA	Regulatory protein spx OS	64.12	1	8	8	8	1.05237	19.1453	1.31895	20.7219	2.64351	24.754	131	15.5192	8.00146
P38494	ypfD	30S ribosomal protein S1 homolog OS	67.8	1	28	28	140	1.27426	16.6275	1.72697	18.3157	2.64169	18.6121	382	42.3763	4.86865
O32210	yvgN	Glyoxal reductase OS	55.43	1	12	12	49	1.27613	11.4219	1.59008	13.183	2.63331	25.3413	276	31.6433	5.37646
P37887	cysK	Cysteine synthase OS	72.73	1	13	13	55	1.10555	16.5234	1.5783	26.2329	2.63291	34.8144	308	32.7991	5.79541
O05505	gmuB	Oligo-beta-mannoside-specific phosphotransferase enzyme IIB component OS	14.56	1	1	1	2	0.992523		1.3253		2.61558		103	11.4357	5.0083
P94498	cysH	Phosphoadenosine phosphosulfate reductase OS	6.01	1	1	1	1	1.2172		1.80578		2.60752		233	26.9574	5.8335
O32213	cysI	Sulfite reductase [NADPH] hemoprotein beta-component OS	9.46	1	5	5	6	1.08824	11.9334	1.31498	33.4322	2.59914	27.2676	571	64.7685	5.87158
O07636	ylaL	Uncharacterized protein YlaL OS	26.09	1	3	3	6	0.903066	18.1311	1.43925	23.9412	2.58828	48.7495	161	17.8841	5.57959
O32072	ytwF	Uncharacterized protein YtwF OS	64.08	1	7	7	14	0.871519	12.2565	1.58591	14.5549	2.58391	30.3165	103	11.8267	4.62744
O31630	yjcH	Uncharacterized protein YjcH OS	26.25	1	4	4	5	1.0232	1.80241	1.64779	46.7966	2.58334	46.9277	240	27.8992	6.45557
O34591	acoB	Acetoin:2,6-dichlorophenolindophenol oxidoreductase subunit beta OS	41.81	1	11	11	15	0.791597	43.8282	8.00787	78.5948	2.5512	62.8017	342	36.8218	4.7417
P54501	yqgX	Uncharacterized protein YqgX OS	29.38	1	5	5	9	1.01289	20.1225	1.95783	10.2814	2.52035	21.7014	211	23.2108	5.14795
P39738	fliD	Flagellar hook-associated protein 2 OS	1.81	1	1	1	1	0.822248		0.700532		2.51986		498	54.4719	5.10986
P39575	galT	Galactose-1-phosphate uridylyltransferase OS	21.64	1	8	8	8	1.18782	19.1452	1.70362	30.84	2.51092	29.7368	513	58.5547	6.03662
O31673	clpE	ATP-dependent Clp protease ATP-binding subunit ClpE OS	16.17	1	7	8	12	1.17962	24.3455	1.79625	26.0822	2.50103	41.7104	699	77.8575	5.41455
O31657	htpX	Protease HtpX homolog OS	18.12	1	6	6	21	0.956608	12.9427	1.68181	22.7825	2.47642	23.3884	298	32.8446	9.75928
P33189	yhxA	Uncharacterized aminotransferase YhxA OS	28.44	1	8	8	15	1.09573	14.3524	1.68522	24.088	2.4667	23.973	450	49.8451	5.97314
O07009	cycB	Cyclodextrin-binding protein OS	2.61	1	1	1	1	0.86839		1.52949		2.45704		421	45.5141	5.74463
P24219	sigL	RNA polymerase sigma-54 factor OS	3.67	1	1	1	1	1.29666		2.30125		2.4354		436	49.6699	7.91357
P38049	hmoB	Heme-degrading monooxygenase HmoB OS	29.52	1	4	4	10	1.31208	18.7601	1.73075	5.23368	2.43267	32.2722	166	18.8165	5.5415
P37571	clpC	Negative regulator of genetic competence ClpC/MecB OS	57.41	1	45	46	139	1.19695	8.74827	1.6546	14.4872	2.43151	18.9883	810	90.0634	6.15088
P37965	glpQ	Glycerophosphoryl diester phosphodiesterase OS	3.07	1	1	1	1	1.30353		1.10675		2.42256		293	32.9382	8.92432
O34411	hisK	Histidinol-phosphatase OS	30.97	1	6	6	6	1.00187	38.7472	1.50154	27.5853	2.42096	26.4889	268	30.4571	5.37646
P25052	tenA	Thiaminase-2 OS	6.36	1	1	1	1	1.26655		1.28291		2.4205		236	27.399	5.23682
P42297	yxiE	Universal stress protein YxiE OS	45.27	1	5	5	10	1.19471	6.59314	0.950127	15.3103	2.34134	14.3442	148	15.9324	6.80029
P39841	yvyI	Putative mannose-6-phosphate isomerase YvyI OS	14.24	1	3	3	3	1.21103	5.07587	2.35998	36.2741	2.33164	36.2978	316	35.4056	5.2876
P02968	hag	Flagellin OS	57.89	2	14	14	59	0.300408	21.222	0.786948	8.87216	2.31828	17.2745	304	32.6065	5.13525
O06477	yfmS	Putative sensory transducer protein YfmS OS	24.83	1	5	5	13	0.813845	15.1476	0.941254	9.08778	2.30536	10.641	286	30.3056	4.80518
P94360	msmX	Maltodextrin import ATP-binding protein MsmX OS	8.49	1	2	2	3	1.2179	16.0329	1.97173	20.5579	2.30527	6.44987	365	41.3397	7.62061
P39574	galK	Galactokinase OS	3.08	1	1	1	1	1.69104		2.29915		2.29946		390	43.4934	5.50342
P54517	yqhS	3-dehydroquinate dehydratase OS	18.24	1	2	2	5	0.904786	13.8793	1.55225	9.17123	2.2939	21.6181	148	16.4214	5.42725
O31764	ymfF	Probable inactive metalloprotease YmfF OS	20.89	1	9	9	19	1.34722	7.97974	1.48724	5.54775	2.29298	29.993	426	48.1738	5.41455
O31629	yjcG	UPF0477 protein YjcG OS	71.35	1	10	10	28	1.14858	7.42467	1.53197	15.0854	2.28396	12.147	171	19.649	5.97314
O34669	yocH	Cell wall-binding protein YocH OS	30.66	2	6	6	11	0.821349	8.54171	1.01976	12.8708	2.28201	37.9879	287	30.1635	8.11865
O31844	czrA	HTH-type transcriptional repressor CzrA OS	12.15	1	1	1	3	1.01255	6.59609	1.61141	3.07007	2.27798	17.4482	107	12.3714	6.17627
O34812	yfmJ	Putative NADP-dependent oxidoreductase YfmJ OS	26.55	1	8	8	15	1.36952	19.7585	1.56828	17.2637	2.2733	35.8398	339	36.6397	5.07178
P50833	yppE	Uncharacterized protein YppE OS	19.51	1	2	2	3	1.32927	23.0429	1.21666	7.19389	2.2657	50.2309	123	14.4504	5.78271
P80244	clpP	ATP-dependent Clp protease proteolytic subunit OS	43.15	1	8	8	57	1.08562	7.98107	2.06747	16.831	2.26206	21.9011	197	21.6683	5.30029
O34932	coaE	Dephospho-CoA kinase OS	15.74	1	3	3	3	1.13953	25.3778	1.64811	16.9534	2.26136	15.2505	197	21.9997	5.13525
P54565	yqkB	Uncharacterized protein YqkB OS	35.51	1	3	3	7	0.754562	14.2234	1.38869	18.0364	2.26114	41.3761	107	11.7569	5.13525
P96611	ydbP	Thioredoxin-like protein YdbP OS	74.53	1	5	5	17	0.855767	18.6978	1.39502	9.37799	2.25271	21.4658	106	12.424	4.67822
P52035	bsaA	Glutathione peroxidase homolog BsaA OS	5	1	1	1	1	1.08453		1.55359		2.25071		160	18.2441	5.5542
P37535	yaaN	Uncharacterized protein YaaN OS	8.29	1	2	2	3	1.28459	8.30083	1.4889	5.97765	2.24861	17.1282	386	43.8033	5.96045
P51777	cspD	Cold shock protein CspD OS	89.39	1	5	5	121	0.918797	8.98457	1.22336	14.6591	2.24791	21.5117	66	7.30455	4.56396
P23445	fliI	Flagellum-specific ATP synthase OS	2.74	1	1	1	1	0.793325		0.94148		2.24557		438	47.3078	6.45557
P39644	ywfH	Bacilysin biosynthesis oxidoreductase YwfH OS	3.86	1	1	1	1	0.928708		1.85964		2.2335		259	28.0042	7.02002
O07609	yhfK	Uncharacterized sugar epimerase YhfK OS	69.16	1	10	10	26	1.2066	18.2534	1.49653	23.0582	2.22857	23.9822	214	22.7458	5.49072
P54718	yfiB	Uncharacterized ABC transporter ATP-binding protein YfiB OS	1.57	1	1	1	1	1.20247		1.66928		2.22478		573	63.9012	8.73389
P37502	yybB	Uncharacterized protein YybB OS	12.27	1	2	2	3	1.10309	8.64834	1.13631	4.79636	2.22245	31.8059	220	25.2509	5.94775
O07529	azr	FMN-dependent NADPH-azoreductase OS	30.46	1	4	4	10	1.00824	9.4732	1.22899	21.631	2.22214	26.1961	174	18.892	6.94678
Q02114	lytC	N-acetylmuramoyl-L-alanine amidase LytC OS	6.85	1	3	3	6	1.03562	8.6506	1.81707	3.05145	2.22095	23.0896	496	52.5935	9.77393
P54170	yphP	UPF0403 protein YphP OS	56.25	1	7	7	25	0.882193	16.7134	1.39935	13.1132	2.2203	22.5102	144	15.8646	4.84326
P37475	spoIIE	Stage II sporulation protein E OS	2.42	1	1	1	4	1.04948	6.52989	1.15298	3.32582	2.21873	3.56427	827	91.91	6.60986
O32197	liaR	Transcriptional regulatory protein LiaR OS	11.85	1	2	2	2	1.55319	42.3365	1.38304	52.6597	2.21293	71.2108	211	23.1102	5.24951
P54532	buk	Probable butyrate kinase OS	20.94	1	5	5	5	1.22201	11.6596	3.15124	46.8991	2.21221	17.4003	363	39.7385	6.11279
O32437	comZ	ComG operon repressor OS	15.87	1	1	1	7	1.07368	4.64954	1.42308	2.68369	2.20681	2.46958	63	7.20953	4.56396
P28599	groS	10 kDa chaperonin OS	73.4	1	7	7	38	1.08689	10.4358	1.81904	20.4774	2.19843	25.6067	94	10.1695	4.81787
O34944	ytjP	Putative dipeptidase YtjP OS	52.48	1	21	21	53	1.09229	15.6081	1.29284	17.3985	2.19701	26.9672	463	51.0207	4.97021
P54542	yqjE	Uncharacterized protein YqjE OS	46.36	1	17	17	53	0.990497	6.56685	1.28215	9.45762	2.1915	13.3086	371	39.6223	5.03369
P96615	ydbS	UPF0699 transmembrane protein YdbS OS	20.75	1	2	2	3	0.908362	8.09266	1.40476	55.5093	2.19139	53.0422	159	18.1108	8.19189
P80864	tpx	Probable thiol peroxidase OS	61.68	1	9	9	38	1.02574	8.62764	1.56573	28.9974	2.1867	26.7451	167	18.2043	4.99561
O05220	ywrF	Uncharacterized protein YwrF OS	6.34	1	1	1	1	1.13335		1.17419		2.18625		205	22.5706	5.31299
P46904	natB	Protein NatB OS	3.89	1	1	1	2	0.612454	49.7219	1.84141	1.35389	2.18031	7.78238	386	42.7646	5.71924
O34355	ytcJ	Putative amidohydrolase YtcJ OS	15.31	1	5	5	6	1.43798	26.4419	1.59788	37.7569	2.1571	33.7372	529	58.4399	5.87158
P94559	ysnB	Putative metallophosphoesterase YsnB OS	27.81	1	4	4	7	0.884024	10.1751	1.09837	21.6338	2.15192	42.137	169	18.8486	5.70654
P19466	mtrB	Transcription attenuation protein MtrB OS	74.67	1	5	5	20	0.984337	14.3187	1.05566	21.9685	2.14631	39.5214	75	8.32332	7.57666
P37542	yabA	Initiation-control protein YabA OS	36.13	1	3	3	5	1.4483	26.0842	1.59406	21.7625	2.14509	22.8767	119	14.0901	6.52197
O07516	yhaH	Uncharacterized membrane protein YhaH OS	44.07	1	6	6	12	1.00201	8.57183	1.43779	6.35283	2.14479	18.9965	118	13.058	8.32373
P54544	misCB	Membrane protein insertase MisCB OS	5.09	1	1	1	1	1.09984		1.47397		2.13882		275	30.7274	9.5542
P46905	yccK	Uncharacterized oxidoreductase YccK OS	4.84	1	1	1	1	0.933326		1.45472		2.13286		310	34.7792	5.33838
O34841	yoeB	Uncharacterized protein YoeB OS	38.67	1	6	6	11	0.834171	15.2619	2.11833	24.0759	2.12731	12.7687	181	20.1256	9.74463
P54464	yqeY	Uncharacterized protein YqeY OS	67.57	1	11	11	44	0.966481	8.19729	1.34184	9.36566	2.12366	24.5672	148	16.7559	5.79541
Q02112	lytA	Membrane-bound protein LytA OS	14.71	1	1	1	1	0.954067		1.2409		2.11626		102	11.2216	4.41162
P54530	yqiS	Probable phosphate butyryltransferase OS	33.11	1	7	7	8	0.892955	15.3005	1.7981	35.2798	2.10944	45.7302	299	31.7269	8.03076
O31709	yknW	Uncharacterized protein YknW OS	13.42	1	2	2	4	0.640922	14.1319	1.29312	7.58421	2.10359	6.3721	231	24.1601	7.18115
P28598	groL	60 kDa chaperonin OS	74.63	1	39	39	439	1.06498	5.67052	1.68968	11.944	2.10356	14.024	544	57.3889	4.77979
P54418	pckA	Phosphoenolpyruvate carboxykinase [ATP] OS	10.44	1	4	4	8	0.835445	30.8511	6.25382	75.6308	2.10168	24.9975	527	58.2352	5.42725
O32113	yutM	Uncharacterized protein YutM OS	25	1	3	3	8	0.835624	17.0012	1.47692	19.2304	2.1008	17.7792	120	12.7429	4.81787
O32224	azoR2	FMN-dependent NADH-azoreductase 2 OS	38.86	1	5	5	8	1.20959	26.2824	1.72688	25.816	2.09644	22.852	211	23.2575	5.43994
P70947	yitU	Putative phosphatase YitU OS	18.52	1	4	4	8	1.22057	9.09469	1.73487	16.6623	2.09531	9.3058	270	30.6141	5.03369
O31550	acoC	Dihydrolipoyllysine-residue acetyltransferase component of acetoin cleaving system OS	15.58	1	5	5	6	0.854046	22.8954	5.98708	63.4411	2.09318	34.9775	398	42.8586	6.96143
P50843	kduI	4-deoxy-L-threo-5-hexosulose-uronate ketol-isomerase OS	3.27	1	1	1	1	1.19846		1.03564		2.08927		275	31.1151	5.49072
P06534	spo0A	Stage 0 sporulation protein A OS	13.86	1	3	3	6	0.966235	8.09632	1.32787	11.4327	2.08474	49.6728	267	29.6725	6.44287
P54466	yqfA	UPF0365 protein YqfA OS	66.77	1	18	18	61	0.951335	16.0218	1.29612	10.3822	2.06792	14.7808	331	35.6188	5.21143
Q03224	glpX	Fructose-1,6-bisphosphatase class 2 OS	30.53	1	9	9	18	1.20793	17.3649	1.59934	17.4934	2.0653	16.8753	321	33.9297	5.38916
P08065	sdhA	Succinate dehydrogenase flavoprotein subunit OS	49.32	1	22	22	53	1.44018	12.6472	2.39522	31.1046	2.05985	39.4935	586	65.1103	6.15088
P46338	pstS	Phosphate-binding protein PstS OS	18	1	3	3	6	0.716922	27.6589	0.796942	8.6927	2.04644	16.3175	300	31.664	5.17334
P39142	pdp	Pyrimidine-nucleoside phosphorylase OS	46.88	1	14	14	41	1.01116	21.3318	1.39966	21.0202	2.03875	28.2675	433	46.1782	5.09717
P39839	yuxL	Uncharacterized peptidase YuxL OS	3.35	1	2	2	2	1.3288	14.406	1.71807	16.3033	2.02489	18.218	657	73.6535	5.45264
P55179	pepT	Peptidase T OS	32.44	1	11	11	20	1.19228	15.5205	1.18468	26.78	2.01872	32.5982	410	45.4807	4.84326
P39586	ywbC	Uncharacterized protein YwbC OS	34.13	1	4	4	13	0.865502	19.7399	1.30504	29.0967	2.01799	26.266	126	14.4242	4.70361
Q01368	spoIIIAB	Stage III sporulation protein AB OS	5.26	1	1	1	1	0.888358		1.28774		2.01794		171	19.1412	8.83643
O34651	hisD	Histidinol dehydrogenase OS	3.04	1	1	1	1	1.08136		1.63423		2.01068		427	46.2278	5.04639
P50727	fer	Ferredoxin OS	17.07	1	2	2	6	0.971854	5.0848	1.66486	3.35156	2.00837	17.1929	82	8.86404	3.90381
P37967	pnbA	Para-nitrobenzyl esterase OS	14.11	1	4	4	7	1.3695	20.991	1.0413	31.1901	2.00397	48.7938	489	53.9522	5.05908
P37538	yaaQ	Uncharacterized protein YaaQ OS	37.61	1	4	4	8	0.990078	8.90659	1.36253	18.5552	1.99688	27.138	109	11.9592	6.53662
Q796K8	pbpH	Penicillin-binding protein H OS	1.28	1	1	1	1	1.05322		0.899895		1.99105		704	79.3676	8.98291
P54154	msrA	Peptide methionine sulfoxide reductase MsrA OS	38.98	1	5	5	9	1.09531	9.35627	1.24277	9.87508	1.98973	11.8321	177	20.1697	6.13818
O05396	yrhD	Uncharacterized protein YrhD OS	40.63	1	7	7	22	1.05714	9.5646	1.23834	18.8062	1.98687	21.8837	160	17.5032	5.03369
O31779	ymcA	Uncharacterized protein YmcA OS	34.97	1	3	3	4	0.882508	28.6439	1.38457	21.1619	1.98674	19.8239	143	16.1563	5.36377
O34789	ydjI	Uncharacterized protein YdjI OS	25.08	1	8	8	13	0.721851	9.7501	1.13635	12.4737	1.98477	23.3438	323	36.0573	5.2876
P24136	oppD	Oligopeptide transport ATP-binding protein OppD OS	14.25	1	3	3	3	0.949926	72.7021	1.69179	27.137	1.97064	47.1662	358	39.7389	6.46826
P54496	yqgS	Lipoteichoic acid synthase-like YqgS OS	2.04	1	1	1	1	1.1174		1.40581		1.964		638	73.1661	5.16064
P42958	ycsA	Probable tartrate dehydrogenase/decarboxylase OS	27.97	1	5	5	7	1.01004	3.98836	2.18333	5.61825	1.96235	14.027	354	38.7035	5.42725
P23129	odhA	2-oxoglutarate dehydrogenase E1 component OS	35.28	1	27	27	77	1.37473	10.4942	2.90116	18.9934	1.961	14.3487	944	106.212	5.88428
P42100	glxK	Glycerate kinase OS	6.02	1	1	1	1	1.43413		1.09125		1.95266		382	39.3753	4.85596
P31847	ypuA	Uncharacterized protein YpuA OS	63.1	1	12	12	29	1.28011	16.0175	1.50003	8.83841	1.94638	43.4043	290	31.2752	4.86865
O31698	ykuL	CBS domain-containing protein YkuL OS	19.05	1	2	2	3	0.934483	3.75282	1.60004	25.3519	1.93928	20.5218	147	16.6247	5.49072
P23448	fliG	Flagellar motor switch protein FliG OS	10.06	1	3	3	4	0.895287	20.2659	1.00373	16.3157	1.92736	9.68132	338	38.1679	4.7417
Q45065	yneT	Uncharacterized protein YneT OS	62.22	1	4	4	6	1.02005	17.9384	1.24808	7.93044	1.92423	11.2765	135	14.9798	5.59229
O31605	yjbG	Oligoendopeptidase F homolog OS	29.4	1	21	21	52	1.59779	10.0241	1.55182	13.4503	1.91107	16.8638	670	77.0248	5.85889
O34334	yjoA	Uncharacterized protein YjoA OS	74.03	1	13	13	34	1.23378	10.2702	1.36	15.4165	1.8993	26.9868	154	17.7819	6.25244
P54518	yqhT	Uncharacterized peptidase YqhT OS	30.03	1	6	6	13	1.0875	12.8331	1.63662	30.4177	1.88673	17.332	353	38.0964	5.13525
Q07428	nrgB	Nitrogen regulatory PII-like protein OS	9.48	1	1	1	1	0.879143		1.21059		1.88111		116	12.8138	8.66064
P54569	yqkF	Uncharacterized oxidoreductase YqkF OS	33.99	1	7	7	11	1.3016	8.17315	1.41881	27.0943	1.88066	46.4874	306	34.6958	5.41455
O34924	ytoP	Putative aminopeptidase YtoP OS	14.85	1	4	4	11	0.818894	14.8807	1.45211	23.6179	1.87884	36.7609	357	39.2118	6.1001
O32212	nhaK	Sodium, potassium, lithium and rubidium/H(+) antiporter OS	2.54	1	2	2	3	0.990924	3.90195	1.55993	21.4078	1.87824	11.7917	670	75.18	8.90967
O05239	yugJ	Probable NADH-dependent butanol dehydrogenase 1 OS	45.22	1	12	13	41	1.32677	10.4208	1.58013	18.5406	1.87455	25.1319	387	42.7056	5.56689
P0CI76	rtp	Replication termination protein OS	9.84	1	1	1	1	1.01246		1.15365		1.87348		122	14.5099	9.39307
P54333	xkdN	Phage-like element PBSX protein XkdN OS	16.22	1	2	2	2	1.03407	1.67692	1.02363	36.0495	1.87261	16.5023	148	17.0868	5.09717
P54443	yrkP	Uncharacterized transcriptional regulatory protein YrkP OS	4.76	1	1	1	1	1.06665		6.59402		1.87244		231	26.7779	6.04932
O31535	yetH	Uncharacterized protein YetH OS	40	1	3	3	5	0.967684	17.0879	1.30119	18.5681	1.8669	24.4326	120	13.6247	4.76709
O35004	ydjH	UPF0603 protein YdjH OS	5.12	1	1	1	1	0.640503		1.20836		1.86439		254	28.1452	6.37939
P39158	cspC	Cold shock protein CspC OS	59.09	1	5	5	16	0.21574	31.0904	0.817128	9.41266	1.86395	22.821	66	7.25049	4.83057
O05389	yrbE	Uncharacterized oxidoreductase YrbE OS	10.56	1	3	3	3	1.08294	18.0081	2.04925	48.4242	1.85953	43.4848	341	37.7641	6.16357
P96705	ydgG	Uncharacterized HTH-type transcriptional regulator YdgG OS	10.53	1	1	1	2	1.60196	4.90684	1.61578	20.1958	1.85287	3.52874	152	17.2631	6.03662
P19465	folE	GTP cyclohydrolase 1 OS	47.37	1	10	10	25	0.876949	4.68733	1.17684	8.21772	1.84911	29.052	190	21.206	6.80029
P07819	sacA	Sucrose-6-phosphate hydrolase OS	3.55	1	1	1	2	1.33172	13.5309	2.53949	5.85436	1.84831	12.2672	479	54.7798	5.80811
O07542	yheA	UPF0342 protein YheA OS	66.67	1	8	8	24	0.837512	15.2138	1.37201	7.10149	1.84486	12.5236	117	13.5837	4.65283
O35019	yfkK	UPF0435 protein YfkK OS	52.11	1	4	4	7	0.672173	13.7193	1.1189	7.42543	1.83443	15.0009	71	8.13005	4.88135
P12310	gdh	Glucose 1-dehydrogenase OS	5.36	1	1	1	1	0.925303		0.248533		1.83372		261	28.0724	5.35107
P54484	yqgA	Cell wall-binding protein YqgA OS	43.66	1	5	5	32	0.739321	18.5446	1.4579	18.947	1.83354	22.1536	142	15.3431	9.80322
P96707	ydgI	Putative NAD(P)H nitroreductase YdgI OS	46.41	1	9	9	14	1.36194	5.02373	1.95986	14.0545	1.83011	35.67	209	23.3448	4.93213
O34384	yceE	Uncharacterized protein YceE OS	22.4	1	3	4	19	1.13046	8.87084	1.33835	10.044	1.82857	17.1127	192	20.9352	4.76709
P24281	yaaK	Nucleoid-associated protein YaaK OS	49.53	1	6	6	28	1.01423	11.3591	1.35076	12.4123	1.8258	15.74	107	11.7728	4.81787
P42972	ycsN	Uncharacterized oxidoreductase YcsN OS	8	1	2	2	2	0.946154	40.3673	1.88553	77.5274	1.8179	55.6918	300	34.1181	5.63037
P39778	clpY	ATP-dependent protease ATPase subunit ClpY OS	35.55	2	14	15	31	1.16785	8.94687	1.40628	13.2085	1.81469	10.3257	467	52.5534	5.59229
O31864	yozE	UPF0346 protein YozE OS	35.14	1	2	2	3	0.820073	0.297971	1.07881	5.51511	1.81325	30.2865	74	8.90611	5.63037
P40767	cwlO	Peptidoglycan DL-endopeptidase CwlO OS	8.25	1	3	3	3	1.32407	4.29959	1.85191	0.369164	1.81266	23.231	473	51.0028	5.61768
O31705	moaE	Molybdopterin synthase catalytic subunit OS	34.39	1	6	6	10	1.01866	7.58384	1.23677	20.4927	1.81255	32.4969	157	17.7711	4.95752
O31500	yerO	Uncharacterized HTH-type transcriptional regulator YerO OS	7.27	1	2	2	2	1.97566	6.20384	2.22904	8.04563	1.81154	18.1101	289	32.8251	5.63037
O34689	mhqA	Putative ring-cleaving dioxygenase MhqA OS	22.15	1	5	5	8	1.09426	11.734	1.51208	16.6539	1.80611	13.6031	316	35.3652	5.75732
P08821	hupA	DNA-binding protein HU 1 OS	83.7	2	8	8	103	0.872853	9.0387	1.23543	12.6192	1.80521	26.8561	92	9.87828	8.99756
O32119	yutI	Putative nitrogen fixation protein YutI OS	22.52	1	2	2	5	0.9066	12.4067	1.20182	16.4609	1.80295	29.2622	111	12.416	4.4624
Q45494	ykrA	Putative phosphatase YkrA OS	19.46	1	3	3	3	0.994322	20.8292	1.19459	27.8325	1.80096	16.0376	257	28.8867	4.88135
P96622	ndoA	mRNA interferase EndoA OS	10.34	1	1	1	1	0.832137		0.995415		1.79923		116	12.9699	5.2749
P94388	cah	Cephalosporin-C deacetylase OS	10.06	1	2	2	2	1.04486	20.186	1.20096	5.60422	1.7974	29.8507	318	35.7841	5.80811
P24072	cheY	Chemotaxis protein CheY OS	39.17	1	3	3	9	0.596533	10.2739	1.0843	21.9512	1.7953	17.3037	120	13.3008	5.09717
O34565	hisH	Imidazole glycerol phosphate synthase subunit HisH OS	13.68	1	2	2	2	0.780573	12.0778	1.32206	85.7053	1.79512	70.3929	212	23.2878	6.12549
P32081	cspB	Cold shock protein CspB OS	89.55	1	6	6	260	0.667996	28.3951	0.949119	23.652	1.7907	35.5842	67	7.36061	4.56396
O34305	ytoQ	Uncharacterized protein YtoQ OS	39.19	1	5	5	12	1.20752	10.6109	1.25564	16.1987	1.78614	7.6245	148	16.7807	6.18896
O34374	yjiB	Putative cytochrome P450 YjiB OS	3.79	1	1	1	1	1.41261		1.14194		1.78473		396	44.962	5.71924
Q02113	lytB	Amidase enhancer OS	5.25	1	3	3	4	0.946679	14.1789	1.71805	21.2394	1.78017	26.9883	705	76.682	9.49561
P55340	ecsB	Protein EcsB OS	2.94	1	1	1	1	1.15205		1.27935		1.77162		408	47.2686	9.90576
P54586	yhcB	Uncharacterized protein YhcB OS	14.77	1	2	2	4	1.05792	14.8267	1.67811	10.3771	1.76654	8.46939	176	19.0034	4.94482
P35137	ppiB	Peptidyl-prolyl cis-trans isomerase B OS	54.55	1	5	5	34	0.857133	8.7586	1.35117	21.4174	1.76585	13.3369	143	15.2463	5.87158
O06006	yraA	Putative cysteine protease YraA OS	46.15	1	10	10	36	1.21661	12.793	1.28284	10.531	1.76298	16.6	169	18.5006	5.08447
P40740	bglH	Aryl-phospho-beta-D-glucosidase BglH OS	29.64	1	12	12	29	1.48155	18.1996	0.723592	17.3679	1.74087	22.4081	469	53.2552	5.24951
P96501	flgL	Flagellar hook-associated protein 3 OS	3.36	1	1	1	1	0.814045		0.883141		1.73603		298	32.7393	4.75439
P81100	yceC	Stress response protein SCP2 OS	37.69	1	6	6	23	1.05222	6.36187	1.30445	14.1881	1.73411	8.2153	199	21.81	5.70654
O34857	rok	Repressor rok OS	42.93	1	6	6	24	0.892624	13.2648	1.3525	10.7404	1.73221	11.5029	191	21.8265	9.31982
P54439	yrkL	Uncharacterized NAD(P)H oxidoreductase YrkL OS	35.06	1	4	4	8	1.11404	12.2722	1.18574	16.6148	1.73141	20.3923	174	20.1063	5.73193
P42319	yxjH	Uncharacterized protein YxjH OS	6.37	2	2	2	2	1.28558	73.3124	1.4302	3.60721	1.7253	24.5045	377	42.6475	5.32568
P37570	yacI	Putative ATP:guanido phosphotransferase YacI OS	18.73	1	6	6	14	1.1925	19.8839	1.58864	29.2953	1.71873	30.5334	363	41.0981	5.32568
P96667	ydeJ	Uncharacterized lipoprotein YdeJ OS	6.39	1	1	1	1	0.839143		1.02896		1.71578		219	24.34	4.88135
O06492	gatC	Glutamyl-tRNA(Gln) amidotransferase subunit C OS	59.38	1	4	4	11	0.824051	1.08935	1.12505	6.26328	1.71536	9.64909	96	10.8525	4.86865
P42419	iolI	Inosose isomerase OS	18.35	1	3	3	6	0.944858	20.752	1.37762	18.6613	1.71465	31.5371	278	31.6359	4.97021
P08066	sdhB	Succinate dehydrogenase iron-sulfur subunit OS	27.27	1	6	6	17	1.33246	11.7245	2.13521	23.5765	1.70595	33.8536	253	28.399	8.11865
P55339	ecsA	ABC-type transporter ATP-binding protein EcsA OS	17	1	5	5	8	1.13581	9.57216	1.25746	12.3485	1.70185	15.839	247	27.7043	6.02393
P80240	greA	Transcription elongation factor GreA OS	78.98	1	11	11	46	1.1044	5.92283	1.24378	10.3195	1.69972	10.7488	157	17.2609	4.729
P24011	ctaC	Cytochrome c oxidase subunit 2 OS	2.53	1	1	1	1	1.1506		1.08681		1.69859		356	40.069	8.54346
O34357	ytpP	Thioredoxin-like protein YtpP OS	46.73	1	4	4	8	0.645119	10.0985	1.25414	8.83634	1.69139	11.2824	107	12.7392	4.60205
O31766	ymfH	Uncharacterized zinc protease YmfH OS	34.11	1	11	11	23	1.25912	10.6392	1.35762	9.07756	1.67767	11.9405	428	48.9178	5.09717
P54533	bfmBC	Dihydrolipoyl dehydrogenase OS	18.78	1	10	10	23	0.887867	9.37534	1.57242	9.34492	1.67606	23.5618	474	50.4041	5.26221
P08877	ptsH	Phosphocarrier protein HPr OS	48.86	1	3	3	78	0.725555	22.5652	0.98113	29.5072	1.67212	21.9645	88	9.1836	4.88135
P54376	gcvPA	Probable glycine dehydrogenase [decarboxylating] subunit 1 OS	2.01	1	1	1	1	1.13289		1.54531		1.66971		448	49.3975	7.09326
P54377	gcvPB	Probable glycine dehydrogenase [decarboxylating] subunit 2 OS	9.43	1	3	3	3	1.19798	24.3525	2.1546	41.1541	1.66548	1.88324	488	54.3926	5.63037
P70945	yitS	DegV domain-containing protein YitS OS	15.55	1	3	3	8	0.871801	10.7727	1.1523	7.36348	1.65906	9.47104	283	31.2571	6.03662
P54946	yxeG	Uncharacterized protein YxeG OS	5.95	1	1	1	1	0.906199		0.718989		1.65709		185	21.3579	11.1948
Q45063	yneR	Uncharacterized protein YneR OS	35.79	1	3	3	4	0.923494	1.9495	1.10257	20.6887	1.657	33.9857	95	10.826	4.03076
O31858	yojF	Uncharacterized protein YojF OS	28.45	1	4	4	10	0.953894	9.99506	1.49111	17.1651	1.65573	28.5483	116	13.0337	7.56201
P94428	gabD	Succinate-semialdehyde dehydrogenase [NADP(+)] OS	24.89	1	9	9	14	1.47288	17.0498	1.41325	9.53601	1.65272	34.7461	462	50.2305	5.03369
P37563	tilS	tRNA(Ile)-lysidine synthase OS	2.97	1	1	1	1	1.40115		1.31654		1.65221		472	53.4304	8.36768
O31441	ybyB	Uncharacterized protein YbyB OS	15.12	1	1	1	1	0.787673		1.01966		1.64691		86	9.856	8.88037
O34666	ctpA	Carboxy-terminal processing protease CtpA OS	21.03	1	8	8	14	1.0271	11.6411	1.13452	19.6402	1.6454	15.8446	466	51.1167	8.48486
P50740	fni	Isopentenyl-diphosphate delta-isomerase OS	5.44	1	2	2	3	0.892297	1.72454	1.06384	10.3981	1.64514	13.0175	349	37.1974	6.65381
O05398	yrhF	Uncharacterized protein YrhF OS	16.39	1	2	2	3	1.16497	8.4161	1.48407	5.25462	1.64379	33.4089	122	13.9732	6.53662
P46343	phoH	PhoH-like protein OS	41.38	1	10	10	20	0.909146	10.0632	1.18188	14.737	1.64031	29.079	319	35.5187	6.58057
P54568	yqkE	Uncharacterized protein YqkE OS	22.97	1	1	1	1	0.978406		1.08992		1.63989		74	9.09877	9.43701
O34833	yceH	Uncharacterized protein YceH OS	45.18	1	15	15	39	0.915557	8.61556	1.35098	15.0361	1.63933	17.8803	363	41.6465	6.03662
O34703	yjoB	Uncharacterized ATPase YjoB OS	37.12	1	12	12	27	1.1368	9.49908	1.11742	11.3578	1.6368	19.8781	423	48.7452	4.99561
P37958	mecA	Adapter protein MecA 1 OS	15.6	1	3	3	4	1.08013	8.98206	1.06418	14.1653	1.63678	30.9977	218	25.7477	4.4751
O31588	yhzB	Uncharacterized protein YhzB OS	9.66	1	2	2	2	0.933671	22.4114	1.27951	5.42682	1.63421	7.63993	207	23.4418	5.16064
P39794	treP	PTS system trehalose-specific EIIBC component OS	9.36	1	5	5	8	1.16878	11.6574	0.972027	19.0126	1.6334	25.7692	470	49.9677	8.42627
O32221	copZ	Copper chaperone CopZ OS	68.12	1	3	3	6	0.657405	14.7599	1.03603	6.83318	1.63231	9.5802	69	7.33354	4.53857
P39214	mcpA	Methyl-accepting chemotaxis protein McpA OS	13.01	2	5	8	16	0.601736	9.72139	0.91175	16.0973	1.63191	14.2032	661	72.269	5.22412
O31642	yjdA	Uncharacterized oxidoreductase YjdA OS	3.19	1	1	1	2	0.995075	3.34733	0.983575	4.97207	1.62757	16.2253	251	27.4317	6.15088
P50863	salA	Protein mrp homolog SalA OS	45.74	1	12	12	34	1.23241	27.8388	1.60655	19.6182	1.61435	26.055	352	38.6141	5.52881
O34525	sppA	Putative signal peptide peptidase SppA OS	17.61	1	4	4	9	0.876055	7.50129	1.25216	15.4427	1.61368	23.2054	335	36.6497	7.50342
P39070	clpQ	ATP-dependent protease subunit ClpQ OS	21.55	1	4	4	9	1.12965	26.7317	1.07892	16.2581	1.6114	23.9069	181	19.4661	6.55127
O34564	ykuU	Thioredoxin-like protein YkuU OS	20	1	2	2	3	1.50259	0.214062	0.789082	23.3316	1.61125	28.4149	180	20.4341	4.76709
P12425	glnA	Glutamine synthetase OS	53.15	1	20	20	122	0.857206	11.0272	1.1058	9.18125	1.61018	17.7159	444	50.2463	5.16064
P37104	ylxM	UPF0122 protein YlxM OS	10.91	1	1	1	1	1.27856		1.2989		1.60912		110	13.1566	4.76709
O05520	moaC	Cyclic pyranopterin monophosphate synthase accessory protein OS	18.82	1	3	3	8	1.07986	7.25802	1.15039	16.1089	1.60887	21.3765	170	18.4403	6.68311
P71088	spo0M	Sporulation-control protein spo0M OS	37.21	1	10	10	46	1.23126	24.6113	1.003	23.9571	1.60604	27.4174	258	29.7149	4.55127
P37569	yacH	Uncharacterized protein YacH OS	10.27	1	2	2	2	1.14477		1.67862		1.60514		185	21.0092	7.06396
P80860	pgi	Glucose-6-phosphate isomerase OS	61.78	1	19	19	108	1.2152	7.89505	1.45669	13.9834	1.60183	18.4573	450	50.5115	5.19873
O05521	rex	Redox-sensing transcriptional repressor rex OS	13.02	1	3	3	5	0.973053	10.5038	1.20178	10.9518	1.60133	23.5644	215	24.0766	7.21045
O34521	nagP	PTS system N-acetylglucosamine-specific EIICB component OS	2.65	1	1	1	1	0.908355		1.20025		1.60059		452	48.5489	7.40088
P70949	yitW	MIP18 family protein YitW OS	22.55	1	3	3	22	1.03942	34.0339	1.04274	14.7301	1.59913	44.3909	102	11.3107	4.4624
O31689	ykvY	Putative dipeptidase YkvY OS	47.11	1	13	13	33	1.06091	6.92077	1.56494	13.8117	1.59884	23.2407	363	40.3086	5.47803
P54531	yqiT	Leucine dehydrogenase OS	41.48	1	11	11	35	1.04975	13.213	1.60823	13.6925	1.59874	25.5492	364	39.967	5.26221
P11065	hpr	HTH-type transcriptional regulator Hpr OS	5.42	1	1	1	2	0.99483	8.20767	1.33312	10.9749	1.59683	20.4517	203	23.6978	5.49072
P39577	dltE	Uncharacterized oxidoreductase DltE OS	9.92	1	2	2	2	1.92353	53.3905	1.45248	28.5135	1.5968	44.5556	252	28.2554	5.2749
O34424	yteJ	Uncharacterized membrane protein YteJ OS	6.1	1	1	1	1	0.797645		1.28941		1.592		164	19.1071	8.76318
P27876	tpiA	Triosephosphate isomerase OS	54.55	1	14	14	111	0.989317	6.75631	1.13277	7.26195	1.59103	24.4787	253	27.0127	5.04639
P80877	metE	5-methyltetrahydropteroyltriglutamate--homocysteine methyltransferase OS	4.07	1	3	3	4	0.711114	19.8405	1.5959	27.6254	1.5908	25.8615	762	86.7526	5.21143
O32093	yueH	Uncharacterized protein YueH OS	73.17	1	5	5	9	1.08071	20.2863	1.6754	9.34306	1.58837	16.2925	82	9.56802	6.80029
P06533	sinR	HTH-type transcriptional regulator SinR OS	17.12	1	2	2	5	0.985679	2.89079	1.04567	7.71585	1.58703	5.51008	111	12.9807	7.40088
P39762	ampS	Aminopeptidase AmpS OS	41.71	1	14	14	22	0.914559	12.5311	1.35263	22.2953	1.58572	24.4041	410	45.7699	5.24951
O34969	yfjR	Uncharacterized oxidoreductase YfjR OS	21.33	1	4	4	8	1.03591	10.0666	1.096	19.7541	1.585	9.65181	286	30.4548	5.17334
O32182	yusP	Uncharacterized MFS-type transporter YusP OS	6.65	1	2	2	5	0.923603	16.6445	1.2368	5.47139	1.58166	21.4655	541	57.908	9.45166
P39157	ywlG	UPF0340 protein YwlG OS	33.33	1	5	5	7	1.08352	10.2081	1.22458	8.51774	1.58161	31.3923	180	19.365	6.90283
O07550	yheI	Probable multidrug resistance ABC transporter ATP-binding/permease protein YheI OS	2.56	1	1	1	1	1.11125		0.936438		1.57956		585	65.0699	6.7124
O31534	hmoA	Heme-degrading monooxygenase HmoA OS	43.52	1	4	4	13	1.06581	9.74195	0.9968	11.8515	1.57616	22.5642	108	12.5655	7.57666
P70993	ywhA	Uncharacterized HTH-type transcriptional regulator YwhA OS	13.67	1	2	2	2	1.28831	25.9003	1.491	42.8611	1.57553	20.8594	139	15.8643	8.17725
P46353	drm	Phosphopentomutase OS	40.36	1	13	13	49	1.10692	10.099	1.43046	9.57917	1.5743	21.7872	394	43.991	5.26221
O34782	yvrD	Uncharacterized oxidoreductase YvrD OS	31.94	1	6	6	13	1.05788	16.3439	1.68107	25.0676	1.5742	25.9113	263	28.2044	4.97021
C0H405	ykzS	Uncharacterized protein YkzS OS	43.75	1	2	2	3	0.799551	29.7127	0.915601	4.55528	1.57309	41.1263	64	7.58687	5.85889
O07581	yhdL	Probable anti-sigma-M factor YhdL OS	14.25	1	4	4	7	1.19083	6.09971	1.4438	11.3115	1.57174	23.0328	358	40.5554	6.59521
P37437	rplI	50S ribosomal protein L9 OS	62.42	1	11	11	69	0.961416	5.96819	1.2344	10.5816	1.56583	11.0471	149	16.342	9.48096
O34425	gapB	Glyceraldehyde-3-phosphate dehydrogenase 2 OS	36.18	1	9	9	15	0.821907	16.2862	6.59441	52.7849	1.56218	26.3343	340	37.4524	6.91748
P54421	lytE	Probable peptidoglycan endopeptidase LytE OS	25.45	1	8	8	35	1.38116	37.4308	1.91044	30.7837	1.5603	30.8683	334	35.4334	10.0962
O07001	yvdT	Uncharacterized HTH-type transcriptional regulator YvdT OS	23.2	1	4	4	4	0.995071	20.1658	1.33132	2.57916	1.55996	28.4713	194	22.2136	5.61768
P94535	glcD	Glycolate oxidase subunit GlcD OS	8.72	1	3	3	4	1.01264	14.1739	2.30929	26.5992	1.55954	28.0228	470	50.9044	5.14795
P19079	cdd	Cytidine deaminase OS	39.71	1	4	4	13	0.792375	10.478	1.01899	14.8125	1.55561	17.0537	136	14.8443	4.97021
O34774	yobJ	Uncharacterized protein YobJ OS	15	1	4	4	6	1.06131	7.4614	1.14143	2.68893	1.55527	13.4082	280	33.7277	9.17334
Q08429	kapB	Kinase-associated lipoprotein B OS	42.97	1	3	3	11	0.97227	22.3085	1.03951	25.2901	1.55305	12.1503	128	14.6594	7.25439
P54550	namA	NADPH dehydrogenase OS	36.39	1	11	11	38	1.30689	10.1718	1.37766	8.8402	1.54624	14.1057	338	37.5599	5.46533
P45913	yqaP	Uncharacterized protein YqaP OS	41.1	1	14	14	28	1.00567	10.0377	0.96442	9.12347	1.5449	12.9678	309	34.7592	5.08447
P54395	ypmA	Uncharacterized protein YpmA OS	58.93	1	3	3	6	0.958518	8.32962	1.27552	3.1095	1.54477	7.85587	56	6.55636	5.0083
P46336	iolS	Protein IolS OS	47.1	1	11	11	32	1.14127	25.2846	1.20213	20.899	1.54291	30.4843	310	35.1463	5.74463
O32181	yusO	Uncharacterized HTH-type transcriptional regulator YusO OS	25.81	1	3	3	3	1.55184	18.5776	1.68898	18.3449	1.54057	14.6837	155	17.3891	6.81494
O32230	smpB	SsrA-binding protein OS	16.67	1	2	2	2	1.15791	7.28517	0.860687	6.89414	1.53717	8.89308	156	18.0798	9.99365
O32254	yvbT	Uncharacterized protein YvbT OS	9.52	1	2	2	2	0.916349	56.077	1.41398	76.761	1.53229	57.9858	336	37.0778	5.66846
O31711	yknY	Uncharacterized ABC transporter ATP-binding protein YknY OS	5.65	1	1	1	1	0.820971		1.06547		1.53228		230	25.256	6.23975
P54169	ypgR	Uncharacterized protein YpgR OS	48.54	1	14	14	34	1.2507	11.0193	1.23991	15.3468	1.53036	13.2636	377	42.5417	5.04639
P70948	yitV	Putative esterase YitV OS	25.1	1	6	6	6	0.998973	6.60312	1.15878	14.4704	1.52916	27.2925	255	29.0451	5.97314
O31669	mtnD	Acireductone dioxygenase OS	5.62	1	1	1	1	0.92625		1.55516		1.5291		178	20.8114	4.71631
P42981	ypjG	Uncharacterized deacetylase YpjG OS	19.07	1	3	3	4	0.929183	20.9838	1.18557	14.9944	1.52673	18.3989	236	26.2474	6.65381
O31564	yfiV	Uncharacterized HTH-type transcriptional regulator YfiV OS	7.5	1	1	1	3	1.1691	8.99646	1.39669	1.81753	1.52669	10.2304	160	18.1995	6.96143
P54465	yqeZ	Uncharacterized protein YqeZ OS	4.58	1	1	1	1	0.699057		1.039		1.52562		437	46.4332	6.03662
O06977	yvcN	Uncharacterized acetyltransferase YvcN OS	5.12	1	1	1	2	1.3164	1.81798	1.21756	2.47559	1.52315	1.14629	254	28.8075	5.98584
O32091	pncA	Uncharacterized isochorismatase family protein PncA OS	16.39	1	3	3	5	1.17089	10.8768	1.43551	10.6708	1.52184	39.4596	183	20.5102	6.03662
O34764	sat	Sulfate adenylyltransferase OS	11.52	2	3	3	3	1.045	12.2103	0.724831	13.4247	1.51922	1.32667	382	42.8569	6.04932
O07523	yhaP	Uncharacterized protein YhaP OS	2.63	1	1	1	1	0.729132		0.956848		1.51873		419	45.4463	5.60498
O34872	ytiB	Putative carbonic anhydrase YtiB OS	23.53	1	4	4	11	0.956287	9.61216	1.18961	9.58512	1.5135	7.51219	187	21.0978	6.63916
O06478	yfmT	Putative aldehyde dehydrogenase YfmT OS	16.49	1	8	8	9	0.999168	35.081	0.896845	12.2833	1.51074	19.2449	485	53.2875	5.35107
P15874	grpE	Protein GrpE OS	57.75	1	10	10	41	0.959077	9.90187	1.13385	10.215	1.50903	13.5418	187	21.6697	4.48779
P81101	frr	Ribosome-recycling factor OS	56.22	1	10	10	42	0.852818	5.53638	0.948662	8.60027	1.50866	9.57163	185	20.754	5.60498
Q06756	ispF	2-C-methyl-D-erythritol 2,4-cyclodiphosphate synthase OS	57.59	1	7	7	11	0.926952	8.46894	1.30577	13.802	1.50664	12.1353	158	17.1149	5.80811
O07513	hit	Protein hit OS	51.72	1	6	6	26	1.01413	11.8281	1.22958	15.0277	1.5016	14.2516	145	16.2882	6.60986
Q794W0	yycH	Two-component system YycF/YycG regulatory protein YycH OS	2.64	1	1	1	2	1.09297	14.6527	1.09703	13.7958	1.49982	19.8516	455	52.1825	5.98584
P80875	yceD	General stress protein 16U OS	49.74	1	6	7	47	1.04822	10.2976	1.30073	10.6241	1.49816	11.8431	193	20.6812	4.65283
P16616	hemC	Porphobilinogen deaminase OS	28.34	1	8	8	17	0.974683	15.3015	1.02631	18.5259	1.49814	23.3477	314	34.8162	5.36377
O35041	yfjT	Uncharacterized protein YfjT OS	18.03	1	1	1	1	0.825373		1.45438		1.49466		61	7.26448	4.41162
P05306	sacP	PTS system sucrose-specific EIIBC component OS	4.34	1	1	1	3	1.39539		1.33024		1.48674		461	49.3653	7.73779
P19670	murAB	UDP-N-acetylglucosamine 1-carboxyvinyltransferase 2 OS	21.21	1	7	7	9	1.16063	17.5771	1.16735	24.3787	1.48522	27.1509	429	45.9712	6.26514
O34681	yjgD	Uncharacterized protein YjgD OS	6.45	1	1	1	1	0.656816		0.830521		1.48358		186	21.2584	7.15186
O31611	yjbM	GTP pyrophosphokinase YjbM OS	34.12	1	6	6	10	1.2713	11.3919	1.38754	10.2525	1.48268	13.5869	211	24.6888	7.13721
P54572	yqkJ	Probable NAD-dependent malic enzyme 1 OS	35.54	1	9	9	41	1.11262	11.2472	1.91249	16.9647	1.48177	18.1121	439	45.8607	5.17334
P37945	lon1	Lon protease 1 OS	26.74	1	18	18	32	1.17831	11.537	1.1939	10.0615	1.47819	20.0778	774	86.5527	6.20166
O32099	yueD	Benzil reductase ((S)-benzoin forming) OS	7.41	1	1	1	2	1.46231	12.5294	1.51557	11.6682	1.47558	21.3754	243	27.0919	6.88818
O05394	mccB	Cystathionine gamma-lyase OS	7.39	1	2	2	4	1.10637	6.36078	1.11638	21.1636	1.46997	9.67967	379	40.8601	5.5415
Q796Y8	ygaF	Putative peroxiredoxin YgaF OS	42.68	1	6	6	13	0.867594	16.1708	1.12019	11.6781	1.46894	25.8334	157	18.0973	6.30322
O07617	phoE	Uncharacterized phosphatase PhoE OS	25.39	1	4	4	7	1.42848	3.20462	1.56176	3.60678	1.46889	6.30295	193	21.9801	5.47803
Q7WY72	ylzA	UPF0296 protein YlzA OS	58.43	1	4	4	5	0.889998	11.2996	1.30789	29.27	1.46854	33.4531	89	9.84315	7.43018
O32163	nifU	NifU-like protein OS	39.46	1	5	5	14	0.806606	11.6704	1.22212	9.22611	1.46753	30.9751	147	16.1559	5.07178
Q45498	yktB	UPF0637 protein YktB OS	37.74	1	5	5	17	1.14627	6.78954	1.5006	13.8811	1.46747	11.6438	212	24.6006	6.88818
P80239	ahpC	Alkyl hydroperoxide reductase subunit C OS	55.61	1	8	8	194	0.888529	10.2673	1.40755	18.1228	1.46709	9.54613	187	20.6142	4.60205
O06744	yitI	Uncharacterized N-acetyltransferase YitI OS	12.75	1	1	1	1	0.846041		1.3615		1.46512		149	16.9326	8.42627
P0CI74	gpsB	Cell cycle protein GpsB OS	43.88	1	4	4	11	0.982674	13.2001	1.06378	14.4492	1.46438	29.5674	98	11.5851	5.98584
P42980	mgsA	Methylglyoxal synthase OS	27.01	2	3	3	3	1.06609	10.8898	1.32604	11.1307	1.46049	4.61319	137	15.1189	5.2749
O34341	yebC	Uncharacterized protein YebC OS	13.11	1	3	3	4	1.07469	8.39726	1.2722	15.6851	1.46041	30.2568	267	30.5983	9.29053
O08336	cypE	Probable bifunctional P-450/NADPH-P450 reductase 2 OS	5.79	1	5	5	5	1.30853	16.9373	1.06859	36.322	1.45843	34.2484	1054	118.601	6.46826
P39605	nfrA1	FMN reductase (NADPH) OS	23.69	1	4	4	7	1.19733	14.5755	1.42737	15.6192	1.45841	17.4977	249	28.3021	6.16357
P39215	mcpB	Methyl-accepting chemotaxis protein McpB OS	11.48	2	4	7	15	0.572387	16.5075	1.01214	16.1319	1.45721	11.752	662	71.8567	5.26221
P39771	purT	Phosphoribosylglycinamide formyltransferase 2 OS	3.13	1	1	1	1	1.04436		1.18773		1.45696		384	42.0666	4.97021
Q9R9I1	htrB	Serine protease Do-like HtrB OS	14.85	1	7	7	9	1.02171	15.4035	1.23919	18.9499	1.45677	26.7328	458	48.6877	4.93213
O34943	ytpR	Putative tRNA-binding protein YtpR OS	40.3	1	8	8	33	0.923026	9.00489	1.16004	6.29917	1.45667	10.1517	201	21.6829	4.56396
Q04796	dapA	4-hydroxy-tetrahydrodipicolinate synthase OS	61.72	1	15	15	118	0.995619	13.9817	1.21764	19.627	1.45651	20.2043	290	31.0222	5.22412
P20458	infA	Translation initiation factor IF-1 OS	25	1	2	2	6	0.587939	8.03726	0.947312	4.13936	1.45586	21.683	72	8.20835	7.51807
O34592	ydjP	AB hydrolase superfamily protein YdjP OS	4.06	1	1	1	1	0.922029		1.22925		1.45481		271	30.4899	4.94482
O07521	yhaM	3'-5' exoribonuclease YhaM OS	37.26	1	8	8	14	1.07363	10.6584	1.24179	17.23	1.45415	22.0403	314	35.6603	6.31592
P45947	arsC	Protein ArsC OS	12.23	1	1	1	1	1.03112		1.45135		1.45411		139	15.5855	5.07178
O07621	hemAT	Heme-based aerotactic transducer HemAT OS	8.56	1	3	3	3	0.622798	12.8336	0.715241	7.14909	1.45323	22.9983	432	48.7375	5.78271
P14802	yoxD	Uncharacterized oxidoreductase YoxD OS	66.81	1	14	14	62	1.03187	10.153	1.54977	14.0619	1.45061	18.2552	238	25.2833	5.66846
P39145	comFA	ComF operon protein 1 OS	2.38	1	1	1	1	0.47703		0.859502		1.44976		463	52.5324	9.45166
P35162	resC	Cytochrome c biogenesis protein ResC OS	5.88	1	1	1	2	1.08895	6.6313	0.967478	15.0903	1.44914	3.77725	391	43.6625	9.51025
P16304	adk	Adenylate kinase OS	50.23	1	10	10	78	0.974984	7.57171	0.924209	8.4545	1.4463	20.8014	217	24.1041	4.76709
P32728	ylxR	Uncharacterized protein YlxR OS	14.29	1	1	1	2	0.979326		1.10974		1.43638		91	10.4027	9.59814
O07587	yhdR	Putative aspartate aminotransferase YhdR OS	19.85	1	6	6	9	0.972225	5.57575	1.20164	10.9052	1.43218	13.3742	393	43.8605	5.2876
O31710	yknX	Putative efflux system component YknX OS	27.32	1	9	9	11	0.86846	10.9595	0.857828	17.6573	1.43193	27.5177	377	41.6819	5.43994
O31790	ymaD	Uncharacterized protein YmaD OS	8.67	1	1	1	4	1.27623	1.81798	1.38495	2.47559	1.43012	1.14629	150	16.2611	5.52881
P54956	yxeQ	Uncharacterized protein YxeQ OS	4.04	1	1	1	1	0.879436		1.22116		1.42805		445	47.6606	6.21436
P42404	hxlB	3-hexulose-6-phosphate isomerase OS	18.38	1	2	2	2	0.783996	2.7194	1.00275	19.2286	1.42726	16.8854	185	19.9502	6.25244
P40924	pgk	Phosphoglycerate kinase OS	79.19	1	30	30	170	0.986845	10.3662	0.970268	10.2334	1.42336	16.5379	394	42.164	5.08447
P23479	sbcD	Nuclease SbcCD subunit D OS	3.07	1	1	1	1	1.20479		1.10681		1.41611		391	43.4653	5.37646
O31576	yfhH	Uncharacterized protein YfhH OS	67.31	1	4	4	6	0.884659	22.8496	1.04728	7.71167	1.41573	9.3133	104	12.002	4.81787
P26900	ansA	L-asparaginase 1 OS	52.89	1	14	14	64	0.978212	13.7379	1.36842	20.1309	1.41519	23.8795	329	36.4313	4.76709
P54570	nudF	ADP-ribose pyrophosphatase OS	25.95	1	5	5	11	1.10998	9.0785	1.11219	11.4452	1.41096	17.4663	185	20.9671	4.80518
P39156	ywlF	Putative sugar phosphate isomerase YwlF OS	40.27	1	6	6	18	1.12424	8.99978	1.22247	11.5907	1.41036	24.7155	149	16.2001	5.79541
P39606	ywcH	Uncharacterized protein YwcH OS	3	1	1	1	1	1.1378		1.35689		1.40974		333	36.5347	6.39209
P42955	yslB	Uncharacterized protein YslB OS	16.89	1	2	2	4	1.07459	3.59597	1.05308	12.2541	1.40805	2.12138	148	17.2756	4.91943
P96684	ydfG	Uncharacterized protein YdfG OS	6.12	1	1	1	1	1.51484		2.1377		1.40222		147	17.3034	6.37939
P42962	ycsE	Uncharacterized protein YcsE OS	37.75	1	7	7	11	1.32892	23.1944	1.21169	12.9118	1.40131	19.646	249	28.1681	4.79248
P94549	fadB	Probable enoyl-CoA hydratase OS	8.91	1	2	2	2	0.990059		0.987651		1.39971		258	27.5364	5.18604
P96618	acpS	Holo-[acyl-carrier-protein] synthase OS	9.09	1	1	1	1	0.896807		1.01676		1.39883		121	13.7093	9.56885
P37557	yabO	Uncharacterized protein YabO OS	27.91	1	2	2	7	0.875268	3.50742	1.17734	8.44812	1.39839	23.3705	86	9.71329	9.64209
P35149	spoIVA	Stage IV sporulation protein A OS	4.07	1	1	1	1	1.26179		1.12542		1.3978		492	55.1403	4.83057
O31754	rasP	Zinc metalloprotease RasP OS	13.27	1	5	5	6	0.891711	5.03714	1.05997	5.12304	1.39688	8.76355	422	46.7137	5.42725
P54499	yqgV	UPF0045 protein YqgV OS	9.62	1	1	1	1	0.792818		1.24781		1.39505		104	11.5651	6.30322
P50736	ypdA	Uncharacterized protein YpdA OS	25.62	1	5	5	8	1.03544	9.02135	1.11652	31.7978	1.39488	31.4671	324	36.3866	6.39209
P21879	guaB	Inosine-5'-monophosphate dehydrogenase OS	77.66	1	39	39	225	1.00152	11.444	1.25859	17.1061	1.3931	16.8066	488	52.9576	6.62451
O34358	htrA	Serine protease Do-like HtrA OS	8.02	1	3	3	3	1.09066	3.51492	1.29294	18.4265	1.39217	28.7359	449	47.6861	4.99561
O34967	rpmE2	50S ribosomal protein L31 type B OS	17.07	1	1	1	2	0.728421	0.214062	0.959246	0.529782	1.38931	1.721	82	9.52473	9.43701
P37552	yabJ	Enamine/imine deaminase OS	44	1	3	3	12	0.875164	7.29878	1.06869	15.5622	1.3884	18.8585	125	13.6449	5.42725
O31545	yfjO	Uncharacterized RNA methyltransferase YfjO OS	3	1	1	1	1	0.948451		1.19246		1.38619		466	52.0996	9.40771
P37942	bfmBB	Lipoamide acyltransferase component of branched-chain alpha-keto acid dehydrogenase complex OS	21.7	1	6	6	11	0.957132	6.06176	1.27597	17.8081	1.38591	24.8412	424	45.8084	5.60498
P45694	tkt	Transketolase OS	62.97	1	31	31	153	1.05804	8.81599	1.23341	12.1032	1.38488	17.861	667	72.2992	5.08447
P54428	yrkA	UPF0053 protein YrkA OS	9.68	1	3	3	4	0.889439	17.1131	1.29095	18.3925	1.38474	6.07247	434	48.954	5.19873
Q06004	gutB	Sorbitol dehydrogenase OS	12.18	1	3	3	3	1.16494	3.60396	1.10816	8.71724	1.38285	24.3529	353	38.3656	5.5415
P94534	glcF	Probable glycolate oxidase iron-sulfur subunit OS	5.41	1	2	2	2	1.70771	42.4902	3.79976	39.3257	1.38188	6.72612	444	49.1727	6.88818
P37503	yybA	Uncharacterized HTH-type transcriptional regulator YybA OS	5.33	1	1	1	2	1.09173	8.0964	0.938915	9.14326	1.3788	22.6753	150	17.5734	9.42236
O34908	ykoX	Uncharacterized membrane protein YkoX OS	4.98	1	1	1	1	1.19307		1.28383		1.37733		221	24.9236	9.70068
O07608	lplJ	Lipoate-protein ligase LplJ OS	64.35	1	15	15	28	1.22129	20.2855	1.25635	31.2223	1.37384	30.4455	331	37.9965	6.29053
O34457	moaB	Molybdenum cofactor biosynthesis protein B OS	19.41	1	2	2	5	0.783091	34.5191	0.935092	5.75773	1.36531	25.2865	170	18.4455	5.40186
P23454	ylxF	FlaA locus 22.9 kDa protein OS	4.41	1	1	1	1	0.661921		0.777159		1.36451		204	22.0839	9.02686
P42973	bglA	Aryl-phospho-beta-D-glucosidase BglA OS	30.06	1	9	9	28	1.10334	13.8203	1.01623	7.92129	1.36241	22.9791	479	54.8066	4.95752
O31607	yjbI	Group 2 truncated hemoglobin YjbI OS	58.33	1	5	5	8	1.18356	6.46936	1.54453	19.5748	1.36234	7.40937	132	15.1065	5.49072
O05508	gmuD	6-phospho-beta-glucosidase GmuD OS	6.02	1	2	2	2	1.37512	30.1529	1.47834	60.9694	1.3623	31.3455	465	54.2997	6.17627
P37561	yabS	Uncharacterized protein YabS OS	8.98	1	1	1	4	0.925442	33.8025	0.56557	56.4586	1.36201	35.537	245	26.7587	4.97021
O07614	yhfO	Uncharacterized N-acetyltransferase YhfO OS	9.4	1	1	1	1	1.00675		0.966054		1.36088		149	16.7374	8.00146
O32175	yusI	Uncharacterized protein YusI OS	67.8	1	6	6	7	0.829647	23.778	1.22242	20.5136	1.36077	16.057	118	13.9	5.92236
O34539	yjiC	Uncharacterized UDP-glucosyltransferase YjiC OS	4.59	1	2	2	2	1.27466		1.08588		1.35944		392	43.9594	4.90674
P96676	ydeS	Uncharacterized HTH-type transcriptional regulator YdeS OS	24.75	1	3	3	4	0.999772	21.1443	1.1199	27.0997	1.35935	4.66902	198	22.1296	7.40088
P54607	yhcW	Uncharacterized protein YhcW OS	27.73	1	5	5	6	1.00848	13.9799	1.23493	18.2442	1.35888	15.8562	220	24.6595	4.90674
P54537	artM	Arginine transport ATP-binding protein ArtM OS	6.67	1	1	1	2	1.49013		1.05309		1.35803		240	26.9321	8.76318
P54431	yrkD	Uncharacterized protein YrkD OS	38.1	1	2	2	2	1.15774	28.5975	1.22571	18.5759	1.35721	41.5296	63	7.02556	5.37646
P42961	ycsD	Uncharacterized protein YcsD OS	18.46	1	2	2	3	0.901798	16.0659	0.918041	13.5676	1.35637	26.5552	130	14.2373	4.97021
P54160	ypbS	Uncharacterized protein YpbS OS	11.76	1	1	1	1	0.986197		0.969842		1.35235		85	9.87899	8.19189
P17585	aadK	Aminoglycoside 6-adenylyltransferase OS	3.52	1	1	1	1	0.835123		0.475176		1.35179		284	33.8856	5.05908
O34499	pgl	6-phosphogluconolactonase OS	38.97	1	9	9	26	1.16551	24.6614	1.40606	26.904	1.34996	23.3174	349	38.387	5.49072
P50735	gudB	Cryptic catabolic NAD-specific glutamate dehydrogenase GudB OS	23.65	2	9	9	22	0.964274	13.7618	1.55927	14.8278	1.34924	19.2498	427	47.3101	5.96045
O07020	lutA	Lactate utilization protein A OS	9.24	1	2	2	5	1.59169	1.87434	2.27567	18.8056	1.34812	9.74828	238	26.375	6.69775
P70996	ywhD	Uncharacterized protein YwhD OS	45.93	1	5	5	7	1.12912	7.7754	1.03476	24.7881	1.34794	30.5659	172	19.4449	6.94678
O34470	ylbL	Uncharacterized protein YlbL OS	8.5	1	2	2	6	1.10369	14.0581	1.27354	13.5199	1.34728	4.37794	341	37.6275	6.66846
P39800	xlyA	N-acetylmuramoyl-L-alanine amidase XlyA OS	3.37	1	1	1	1	1.10637		1.55149		1.34585		297	31.893	5.75732
Q06750	cysE	Serine acetyltransferase OS	10.6	1	1	1	2	1.59679	0.214062	1.8006	0.529782	1.34483	1.721	217	24.1278	9.12939
O34593	yjqA	Uncharacterized protein YjqA OS	26.4	1	3	3	4	0.93473	14.7158	1.04048	9.17788	1.34467	21.7709	125	13.8154	5.57959
P46354	punA	Purine nucleoside phosphorylase 1 OS	60.89	1	10	10	60	1.0477	7.07022	1.11485	9.80796	1.34349	12.4289	271	29.108	5.14795
P23789	xre	HTH-type transcriptional regulator Xre OS	23.01	1	2	2	2	0.987497		1.25839		1.34304		113	13.2496	8.27979
Q797E6	ydhG	Uncharacterized protein YdhG OS	32.52	1	3	3	3	0.871947	13.9952	0.885206	51.3697	1.34077	22.7484	123	14.4093	5.77002
O06746	yitK	UPF0234 protein yitk OS	41.72	1	5	5	10	0.96625	19.0442	1.12082	18.1056	1.33868	14.7771	163	18.1909	9.18799
P04990	thrC	Threonine synthase OS	15.91	1	4	4	10	0.884191	15.0106	1.07197	14.7552	1.33865	15.3715	352	37.4403	5.47803
O31581	yfhM	AB hydrolase superfamily protein YfhM OS	5.59	1	1	1	1	1.08916		0.818214		1.33839		286	32.7378	6.53662
C0H3Z1	yjzG	Uncharacterized protein YjzG OS	12.28	1	1	1	1	0.76282		0.901491		1.33439		57	6.68657	9.86182
Q45497	yktA	UPF0223 protein YktA OS	19.32	1	2	2	2	0.92177	7.58848	1.02859	0.281672	1.33212	18.395	88	10.4701	4.97021
P96706	ydgH	Putative membrane protein YdgH OS	10.4	1	7	7	10	1.31564	11.1267	1.30677	19.404	1.33023	9.17193	885	95.4289	5.49072
O07582	sigM	RNA polymerase sigma factor SigM OS	6.13	1	1	1	1	1.05555		1.19109		1.32937		163	19.3948	7.21045
P39773	gpmI	2,3-bisphosphoglycerate-independent phosphoglycerate mutase OS	50.88	1	22	22	136	0.934883	4.85058	1.20229	8.69805	1.32902	16.1365	511	56.2737	5.56689
P39593	thiM	Hydroxyethylthiazole kinase OS	6.62	1	1	1	2	0.847839	0.214062	1.00045	0.529782	1.32875	1.721	272	28.1958	5.77002
P46347	ybeY	Endoribonuclease YbeY OS	22.29	1	4	4	7	0.945279	8.101	1.02409	16.4341	1.32661	17.6743	157	17.7477	4.42432
P54571	mleN	Malate-2H(+)/Na(+)-lactate antiporter OS	2.35	1	1	1	1	0.867241		1.62178		1.32576		468	50.1793	7.51807
P50829	ypqE	Putative phosphotransferase enzyme IIA component YpqE OS	38.69	1	3	3	5	0.838693	11.6951	1.39894	12.5414	1.32568	41.6342	168	17.9244	5.59229
O31610	yjbL	UPF0738 protein YjbL OS	21.31	1	2	2	4	0.973707	5.88264	1.58064	14.8967	1.3249	9.81745	122	14.0501	4.57666
Q08787	srfAC	Surfactin synthase subunit 3 OS	3.06	1	2	2	2	0.973133	16.4893	0.765495	29.3993	1.32435		1275	143.781	5.32568
O31628	yjcF	Uncharacterized N-acetyltransferase YjcF OS	10.71	1	1	1	1	0.780244		1.15774		1.32324		140	15.658	5.87158
O32245	yvbH	Uncharacterized protein YvbH OS	24.51	1	3	3	3	0.862855	12.5902	1.10815	14.6061	1.32168	34.5931	204	23.7871	5.2876
P94520	ysdB	Sigma-w pathway protein YsdB OS	12.31	1	2	2	2	0.923515	6.77161	0.835859	2.0714	1.32008	17.8622	130	15.5623	9.1001
O34594	cccB	Cytochrome c-551 OS	11.61	1	1	1	1	1.1014		1.22761		1.31687		112	11.9209	5.2749
P23446	flgG	Flagellar basal-body rod protein FlgG OS	22.35	1	4	4	5	0.642592	21.0442	0.693619	9.63894	1.31666	30.8437	264	27.4386	5.14795
P39587	ywbD	Putative ribosomal RNA large subunit methyltransferase YwbD OS	12.12	1	4	4	5	1.07823	5.13298	1.03043	3.54498	1.31565	37.629	396	44.4161	8.85107
P80871	ywrO	General stress protein 14 OS	49.14	1	6	6	16	1.31822	12.0811	1.1211	18.8128	1.31506	18.4076	175	19.942	5.51611
O31636	yjcN	Uncharacterized protein YjcN OS	12.26	1	1	1	6	0.947728	8.26363	0.64513	13.7804	1.31417	16.6546	106	11.9392	8.39697
P54942	yxeC	Uncharacterized protein YxeC OS	6.82	1	1	1	2	0.747512	5.85107	0.796145	20.1621	1.31407	9.9052	132	15.6463	9.75928
P54534	yqiW	UPF0403 protein YqiW OS	50.34	1	6	6	30	1.04008	6.9057	1.20961	10.3629	1.31228	15.1622	145	16.1859	5.08447
O06975	whiA	Putative sporulation transcription regulator WhiA OS	3.16	1	1	1	1	0.97556		1.16422		1.30903		316	36.3173	9.17334
P46344	yqfF	Uncharacterized protein YqfF OS	8.02	1	4	4	7	1.10036	16.579	1.06891	10.7197	1.30874	14.1057	711	79.1167	7.81104
P54479	zur	Zinc-specific metallo-regulatory protein OS	16.55	1	3	3	8	1.01899	12.2898	1.27609	11.1211	1.30652	15.2095	145	16.6259	5.07178
O31609	yjbK	Uncharacterized protein YjbK OS	19.47	1	3	3	5	1.05827	18.6053	1.14252	21.1146	1.30167	37.9797	190	22.2245	6.31592
O34909	yerA	Putative adenine deaminase YerA OS	26.9	1	11	11	19	1.19813	14.7393	1.41054	22.4664	1.29985	30.9492	580	66.6027	6.26514
O34496	ytpQ	UPF0354 protein YtpQ OS	11.52	1	4	4	7	1.01553	4.70553	1.042	27.0164	1.2995	7.87653	269	31.0239	5.63037
O34627	pfyP	Blue-light photoreceptor OS	10.73	1	2	2	3	1.07285	4.32646	1.37118	9.61293	1.29549	25.6791	261	29.1762	4.99561
P16655	divIB	Cell division protein DivIB OS	10.27	1	2	2	2	1.37161	29.5684	1.16848	15.6193	1.29121	32.014	263	30.1479	8.88037
P13792	phoP	Alkaline phosphatase synthesis transcriptional regulatory protein PhoP OS	12.08	1	2	2	3	1.10884	5.91193	1.52492	17.5616	1.29032	29.8026	240	27.5805	5.2749
P26497	spo0J	Stage 0 sporulation protein J OS	40.43	1	9	9	17	1.00881	17.0885	1.06007	17.2889	1.28862	20.6155	282	32.1905	8.22119
P37573	disA	DNA integrity scanning protein DisA OS	17.5	1	4	4	9	1.01965	12.0156	1.03663	16.4272	1.28642	12.1092	360	40.7086	5.93506
O07021	lutB	Lactate utilization protein B OS	13.36	1	6	6	10	1.47085	16.5437	2.06531	18.936	1.28635	17.9425	479	53.4402	6.27783
O34996	polA	DNA polymerase I OS	27.5	1	19	19	27	1.09898	7.56098	1.15435	11.814	1.28466	17.3781	880	99.0302	5.21143
P39594	thiE	Thiamine-phosphate synthase OS	29.73	1	5	5	11	1.07552	7.52187	0.984197	8.44488	1.28414	20.5814	222	23.6662	5.35107
O32238	yvaP	Uncharacterized HTH-type transcriptional regulator YvaP OS	32.41	1	3	3	4	0.854845	26.0815	1.17207	22.7572	1.28101	11.5919	108	12.2635	5.07178
P28823	folB	Dihydroneopterin aldolase OS	59.17	1	6	6	12	0.991563	4.6217	1.0572	13.5223	1.28041	18.9555	120	13.508	5.5415
O34365	ytmB	Uncharacterized protein YtmB OS	13.75	1	1	1	2	0.903558	4.9409	1.01935	3.62717	1.27992	1.55089	80	9.26079	7.23975
P96608	ydbM	Putative acyl-CoA dehydrogenase YdbM OS	7.09	1	2	2	3	1.06273	9.38702	0.801679	30.4819	1.27376	9.13136	381	42.1134	6.16357
P55342	yllA	UPF0747 protein YllA OS	26.9	1	12	12	23	1.00139	8.33958	1.25049	16.535	1.27315	10.9308	539	62.629	5.49072
C0H3V2	mtlF	Mannitol-specific phosphotransferase enzyme IIA component OS	55.24	1	6	6	9	0.714266	6.78473	1.15515	3.18936	1.27311	20.5046	143	15.7369	4.51318
P54162	rnhA	14.7 kDa ribonuclease H-like protein OS	6.82	1	1	1	1	0.554246		0.728169		1.27146		132	14.6606	5.96045
O34476	ytkP	Probable cysteine synthase OS	30.23	1	6	6	12	0.98513	7.89075	1.01847	22.4412	1.27085	8.77623	311	33.0451	5.21143
P71047	ywgB	Putative HTH-type transcriptional regulator YwgB OS	15.38	1	1	1	2	0.969452		0.858696		1.27073		156	17.4241	5.99854
O31484	yczJ	Uncharacterized protein YczJ OS	9.47	1	1	1	1	0.884177		0.886979		1.27063		95	11.2134	5.21143
O35011	rpoZ	DNA-directed RNA polymerase subunit omega OS	70.15	1	5	5	16	0.874102	10.9297	1.08368	11.0006	1.26815	15.1827	67	7.74897	5.89697
P37960	mrgA	Metalloregulation DNA-binding stress protein OS	26.8	1	3	3	9	0.793003	11.1909	1.25436	13.4764	1.26792	19.0943	153	17.3216	4.84326
O32259	lutC	Lactate utilization protein C OS	24.58	1	5	5	13	1.33284	8.19612	1.81221	22.5513	1.2651	23.4963	240	26.2605	5.47803
O32161	yurT	Uncharacterized protein YurT OS	43.31	1	4	4	15	1.07472	11.9239	1.24917	9.39012	1.26376	34.3409	127	14.4284	4.90674
P71082	ygaD	Putative multidrug export ATP-binding/permease protein YgaD OS	7.07	1	3	3	5	0.833072	13.2178	1.17795	9.79291	1.26028	19.2234	580	65.7257	7.43018
O34385	mntA	Manganese-binding lipoprotein MntA OS	65.69	1	16	16	48	0.908749	11.9112	1.01228	10.4755	1.26001	12.5048	306	33.3971	6.62451
P24073	fliY	Flagellar motor switch phosphatase FliY OS	12.17	1	3	3	8	0.895294	4.55548	0.968967	17.9159	1.25922	14.3643	378	41.027	4.41162
P25144	ccpA	Catabolite control protein A OS	51.5	1	14	14	61	0.908208	11.5243	1.02554	13.4241	1.25813	16.7024	334	36.9171	5.36377
Q45499	suhB	Inositol-1-monophosphatase OS	17.74	1	4	4	5	1.08705	19.1375	1.08171	26.3995	1.25745	21.1267	265	29.7412	5.37646
Q45061	yneP	Uncharacterized protein YneP OS	31.16	1	3	3	3	0.836425	8.74128	1.14692	12.2641	1.2556	14.1734	138	15.9851	8.104
O34633	yjlC	Uncharacterized protein YjlC OS	65.71	1	9	9	47	0.917255	6.45972	1.28801	14.2968	1.25334	16.9884	140	15.5731	4.55127
A3F3D2	-	Chorismate mutase OS	12.7	2	2	2	2	1.09368	10.3669	1.10624	13.9673	1.25216	0.714614	126	14.3765	5.88428
P50844	kdgR	HTH-type transcriptional regulator KdgR OS	5.31	1	1	1	1	1.27123		1.21194		1.25207		339	37.834	8.66064
P80879	dps	General stress protein 20U OS	33.1	1	4	4	9	0.57968	13.8078	0.723671	14.9068	1.24803	19.9995	145	16.5831	4.729
P96741	ywtE	Uncharacterized protein YwtE OS	42.31	1	8	8	19	1.07513	17.7897	1.13864	18.9323	1.2466	21.9792	286	31.5681	5.10986
P39617	ywdI	Uncharacterized protein YwdI OS	40	1	3	3	9	0.884904	20.1062	1.23864	22.3197	1.24574	22.6113	105	11.8159	5.12256
P39760	ktrC	Ktr system potassium uptake protein C OS	9.05	1	2	2	3	1.13792	8.9965	1.14708	1.53388	1.24465	19.0953	221	24.333	6.06201
O32126	yutE	UPF0331 protein YutE OS	40.28	1	5	5	10	1.1019	24.2583	1.28069	20.6159	1.24248	21.5774	144	16.6395	4.91943
O31801	yncF	Probable deoxyuridine 5'-triphosphate nucleotidohydrolase YncF OS	39.58	2	4	4	7	1.02686	9.67767	1.10088	5.11474	1.24092	24.3647	144	16.3993	5.41455
O34758	yrrL	UPF0755 protein YrrL OS	25	1	7	7	8	1.17331	28.7141	1.07207	12.1693	1.24048	20.4589	360	40.4762	9.29053
P71013	sipT	Signal peptidase I T OS	22.8	1	4	4	8	0.863389	9.96952	1.19402	15.3418	1.24003	15.7628	193	21.8406	9.46631
P37476	ftsH	ATP-dependent zinc metalloprotease FtsH OS	41.44	1	23	23	98	1.02661	9.72473	1.12204	9.47725	1.23986	11.6714	637	70.8931	6.25244
O31593	yhbJ	Putative efflux system component YhbJ OS	17.65	1	4	4	6	0.786101	18.1369	1.95979	25.725	1.23934	13.1009	221	23.608	4.7417
P39914	ytxJ	Uncharacterized protein YtxJ OS	21.3	1	2	2	5	0.495683	17.3714	0.938459	15.0597	1.23718	21.1365	108	12.3941	5.36377
P12878	rpsN1	30S ribosomal protein S14 OS	24.59	2	2	2	4	0.808354	4.38266	0.937399	12.8569	1.23672	10.8261	61	7.24089	10.4478
P39647	cysL	HTH-type transcriptional regulator CysL OS	5.35	1	1	1	1	1.10552		1.0571		1.23586		299	34.1688	7.37158
P28611	motA	Motility protein A OS	9.26	1	2	2	2	0.682197	16.5593	0.866078	23.2895	1.23502	29.6713	270	29.3207	5.26221
O34450	nagA	N-acetylglucosamine-6-phosphate deacetylase OS	24.24	1	5	5	7	1.03669	22.5947	1.04709	17.4525	1.2345	39.2125	396	42.5958	5.64307
P37572	radA	DNA repair protein RadA homolog OS	2.62	1	1	1	1	1.09663		0.980843		1.23191		458	49.4517	8.20654
P42979	ypjD	Uncharacterized protein YpjD OS	19.82	1	2	2	2	1.04552	10.5794	1.1159	22.4863	1.23146	27.4362	111	12.9624	5.24951
P08164	nadE	NH(3)-dependent NAD(+) synthetase OS	57.35	1	11	11	40	1.0526	14.1857	1.00824	14.8135	1.23013	18.2317	272	30.3764	5.21143
Q45585	sigW	RNA polymerase sigma factor SigW OS	9.63	1	1	1	1	0.808415		0.936779		1.22901		187	21.6996	8.47021
P54473	ispH	4-hydroxy-3-methylbut-2-enyl diphosphate reductase OS	47.13	1	10	10	16	1.07154	10.347	1.16975	13.0513	1.22807	10.4953	314	34.9362	6.03662
P37527	pdxS	Pyridoxal biosynthesis lyase PdxS OS	57.82	1	14	14	58	0.885343	11.8949	0.979269	13.525	1.22779	19.3463	294	31.5912	5.35107
P94474	yeaC	Uncharacterized protein YeaC OS	9.69	1	2	2	3	1.22174	22.4618	0.95227	41.6906	1.2266	19.4668	320	35.8347	5.94775
O05268	yumC	Ferredoxin--NADP reductase 2 OS	51.51	1	14	14	73	0.865332	6.97668	1.13886	13.3085	1.22625	20.0249	332	36.818	5.38916
P39816	gamP	Putative PTS system glucosamine-specific EIICBA component OS	1.58	1	1	1	1	0.899645		0.935598		1.22586		631	68.1008	5.89697
P37941	bfmBAB	2-oxoisovalerate dehydrogenase subunit beta OS	45.87	1	11	11	28	1.00718	13.5889	1.41161	10.1478	1.22574	20.4176	327	35.8332	5.09717
P54549	yqjL	Uncharacterized protein YqjL OS	6.72	1	1	1	1	0.78512		1.34186		1.22479		253	28.154	7.02002
O07517	yhaI	Uncharacterized protein YhaI OS	10.62	1	1	1	1	0.837442		1.06535		1.22454		113	13.2976	4.60205
P80643	acpA	Acyl carrier protein OS	40.26	1	3	3	12	0.809158	8.51132	1.10981	10.7127	1.22453	14.73	77	8.58616	3.97998
O34948	ykwC	Uncharacterized oxidoreductase YkwC OS	41.32	1	9	9	24	1.13759	16.4043	1.02592	22.9476	1.22429	25.8803	288	30.6915	5.37646
P49851	ykhA	Uncharacterized acyl-CoA thioester hydrolase YkhA OS	43.6	1	5	5	10	1.22506	7.03337	1.41801	20.4978	1.22396	12.5367	172	19.2858	7.91357
O34860	rsbRB	RsbT co-antagonist protein RsbRB OS	27.8	1	6	6	10	1.09546	10.1691	1.3062	21.9212	1.22236	15.0911	277	32.3665	5.03369
O34629	yerH	Uncharacterized lipoprotein YerH OS	23.48	1	9	9	23	1.12731	8.59837	1.02963	14.8502	1.22116	31.4875	396	44.4894	5.17334
P18156	glpF	Glycerol uptake facilitator protein OS	4.01	1	1	1	3	0.889363	1.10723	1.43234	21.8221	1.22038	24.9482	274	28.7165	9.26123
P08874	abrB	Transition state regulatory protein AbrB OS	45.83	1	5	5	45	0.888277	12.1906	1.0345	10.7416	1.21786	5.28745	96	10.7658	6.7124
P54575	ribC	Riboflavin biosynthesis protein RibC OS	20.89	1	4	4	6	1.30377	22.4413	1.13085	6.59125	1.21761	34.2433	316	35.6395	8.26514
P12011	gntK	Gluconokinase OS	17.93	1	7	7	9	1.17019	12.4099	1.11474	23.7491	1.21749	26.2788	513	57.1331	5.90967
P54604	yhcT	Uncharacterized RNA pseudouridine synthase YhcT OS	5.3	1	1	1	1	1.01989		1.18818		1.21552		302	33.7097	9.26123
O31641	yjcS	Uncharacterized protein YjcS OS	25.71	1	2	2	3	1.02587	2.72247	1.13556	16.8823	1.2127	21.6766	105	12.4482	5.78271
P52999	panD	Aspartate 1-decarboxylase OS	44.88	1	9	9	20	0.993483	5.46636	1.05937	6.58952	1.20963	16.9341	127	13.8911	5.93506
O35014	ykuI	Uncharacterized EAL-domain containing protein YkuI OS	4.91	1	1	1	1	0.879594		0.974853		1.20574		407	47.927	4.77979
P37522	soj	Sporulation initiation inhibitor protein Soj OS	9.88	1	2	2	3	1.12054	13.2696	1.20654	14.1874	1.2042	3.43918	253	27.5258	5.23682
O34375	minJ	Cell division topological determinant MinJ OS	2.52	1	1	1	3	0.917477	4.34554	1.01721	18.5631	1.20251	6.6089	397	43.6387	8.88037
O34693	yloA	Uncharacterized protein YloA OS	10.31	1	5	5	6	1.27969	13.5153	0.907018	11.7044	1.20164	14.2129	572	65.433	8.70459
Q01625	misCA	Membrane protein insertase MisCA OS	4.21	1	1	1	4	0.848828	1.42176	0.904622	5.68365	1.20122	3.89165	261	29.5018	9.62744
P50866	clpX	ATP-dependent Clp protease ATP-binding subunit ClpX OS	41.9	1	17	17	78	0.964823	8.08255	1.136	9.40578	1.20095	18.0944	420	46.3214	4.94482
O05405	yrhO	Uncharacterized protein YrhO OS	17.82	1	3	3	4	1.10753	54.2579	1.09291	37.4351	1.19809	35.8361	275	31.7115	5.70654
P80870	yugI	General stress protein 13 OS	86.15	1	11	11	59	0.785484	7.46069	1.08283	13.6657	1.19692	16.9078	130	14.2745	6.32861
P17865	ftsZ	Cell division protein FtsZ OS	58.12	1	17	17	68	0.901482	9.14702	1.04113	10.8683	1.19191	20.8452	382	40.37	5.10986
P71021	divIVA	Septum site-determining protein DivIVA OS	41.46	1	6	6	27	1.27749	12.3962	1.08057	10.6743	1.18952	17.457	164	19.329	5.10986
P46908	fnr	Anaerobic regulatory protein OS	8.4	1	1	1	1	0.892937		1.02623		1.18919		238	27.2002	6.41748
P54472	yqfO	UPF0135 protein YqfO OS	23.59	1	8	8	23	0.924311	13.9968	1.12189	9.51663	1.18569	8.02664	373	40.8941	5.77002
P18159	pgcA	Phosphoglucomutase OS	49.23	1	27	27	70	1.02439	6.73333	1.16343	12.2536	1.18528	18.1084	581	64.6231	5.09717
O31615	yjbQ	Putative Na(+)/H(+) antiporter YjbQ OS	1.95	1	1	1	1	1.0559		1.44596		1.18169		614	67.4246	5.5542
P54456	yqeK	Uncharacterized protein YqeK OS	46.24	1	7	7	17	0.907838	18.0421	1.05972	37.5937	1.18024	26.6718	186	21.2689	6.43018
P21204	yszB	UPF0735 ACT domain-containing protein YszB OS	21.09	1	2	2	2	0.843815	6.2739	0.938139	5.49077	1.18015	29.247	147	16.6487	6.81494
O34394	yjjA	Uncharacterized protein YjjA OS	43.33	1	10	10	13	1.08103	4.22604	1.30778	11.1647	1.17815	16.154	270	29.8177	5.37646
P35136	serA	D-3-phosphoglycerate dehydrogenase OS	32.76	1	13	13	21	1.01617	12.4827	1.37749	11.9229	1.17537	17.8259	525	57.0938	6.02393
P54511	lipM	Octanoyltransferase LipM OS	18.35	1	3	3	5	1.24746	9.04156	1.2265	5.4653	1.17363	19.2583	278	32.2204	6.3667
P96708	ydgJ	Uncharacterized HTH-type transcriptional regulator YdgJ OS	6.71	1	1	1	1	1.00686		1.20745		1.17332		164	18.797	9.0708
P40409	feuA	Iron-uptake system-binding protein OS	40.06	1	11	11	25	0.748831	16.894	1.55579	15.3636	1.17325	19.2616	317	35.0865	7.94287
P54167	metA	Homoserine O-succinyltransferase OS	7.64	1	2	2	3	1.15534	14.685	1.17198	11.6753	1.17318	20.6689	301	35.3479	6.48096
P54519	yqhY	Uncharacterized protein YqhY OS	54.81	1	6	6	14	1.08277	5.14323	0.899264	10.5847	1.17255	9.64389	135	14.6255	4.729
P28619	rph	Ribonuclease PH OS	38.78	1	7	7	19	0.884825	21.0251	0.864528	19.6737	1.17017	20.8599	245	26.6649	5.19873
P16336	secY	Protein translocase subunit SecY OS	7.89	1	4	4	5	0.879064	10.471	0.953319	10.2789	1.16837	8.598	431	47.2125	9.89111
O06986	yvdD	LOG family protein YvdD OS	13.09	1	1	1	1	1.07942		1.5743		1.16767		191	21.0403	5.33838
P13799	degS	Signal transduction histidine-protein kinase/phosphatase DegS OS	13.51	1	4	4	7	1.1104	20.4756	0.942861	16.1423	1.16738	23.1296	385	44.9297	6.39209
O31818	ynzC	UPF0291 protein YnzC OS	53.25	1	5	5	10	0.884519	7.87827	1.32715	19.0799	1.16483	23.1132	77	8.80077	9.78857
Q9JMQ2	ppaX	Pyrophosphatase PpaX OS	9.72	1	3	3	3	1.09692	10.9651	1.24268	5.61993	1.16348	14.5959	216	23.9881	4.84326
P54574	fur	Ferric uptake regulation protein OS	28.19	1	4	4	6	1.19438	12.6013	0.951512	23.0123	1.16327	33.2844	149	17.4168	5.57959
Q9KWU4	pyc	Pyruvate carboxylase OS	31.79	1	28	28	49	1.31923	30.1129	1.27082	30.1517	1.16239	30.8427	1148	127.856	5.75732
O31489	ydcI	Uncharacterized protein YdcI OS	16.83	1	11	11	15	1.35218	15.5195	1.20723	14.3551	1.16121	25.2547	719	81.3604	7.18115
P45902	yqaE	Uncharacterized HTH-type transcriptional regulator YqaE OS	19.83	1	2	2	4	1.05888	16.6293	1.18219	15.0832	1.16121	4.46666	116	13.303	5.70654
P80238	ydaG	General stress protein 26 OS	25	1	3	3	6	0.664173	11.999	0.822586	5.66182	1.16075	9.05495	140	15.867	5.5415
O34557	rpe	Ribulose-phosphate 3-epimerase OS	14.75	1	3	3	4	0.870496	18.7073	1.0069	25.3946	1.15979	20.5935	217	23.3195	6.1001
P96711	araR	Arabinose metabolism transcriptional repressor OS	5.25	1	1	1	1	1.09543		1.15339		1.1595		362	40.4618	6.60986
P80859	gndA	6-phosphogluconate dehydrogenase, NADP(+)-dependent, decarboxylating OS	59.7	1	24	25	90	1.22651	6.49234	1.12005	10.2255	1.15792	16.3574	469	51.7425	5.35107
P37455	ssb	Single-stranded DNA-binding protein ssb OS	37.79	1	6	6	14	1.00866	15.5763	1.18632	24.717	1.15434	28.2917	172	18.731	5.16064
O31509	yeeI	Probable transcriptional regulatory protein YeeI OS	28.45	1	4	5	10	1.29703	27.5684	1.0296	21.0089	1.15295	36.0718	239	26.2971	4.57666
P80862	serC	Phosphoserine aminotransferase OS	27.58	1	7	7	14	1.04938	7.99007	1.25276	8.23442	1.15224	26.0594	359	40.1101	5.89697
O34442	mgtE	Magnesium transporter MgtE OS	9.09	1	3	3	5	0.996415	10.3901	1.20636	7.99022	1.15182	8.36639	451	50.8119	4.91943
P37545	yabD	Uncharacterized deoxyribonuclease YabD OS	13.33	1	3	3	6	1.09397	9.74367	1.11165	3.99434	1.15016	11.0161	255	29.2138	5.07178
O34768	ydjE	Uncharacterized sugar kinase YdjE OS	3.44	1	1	1	1	1.11204		1.69852		1.14779		320	34.2346	4.99561
O34528	yrvN	Uncharacterized AAA domain-containing protein YrvN OS	3.09	1	1	1	1	1.06484		0.951181		1.1454		421	46.4853	7.23975
P39121	deoC	Deoxyribose-phosphate aldolase OS	41.26	1	9	9	33	1.0999	2.94878	1.21768	12.5805	1.14381	10.0864	223	23.246	5.16064
P70962	rapB	Response regulator aspartate phosphatase B OS	1.86	1	1	1	1	1.0479		0.927403		1.14329		377	45.0084	5.14795
O34700	yebG	Uncharacterized protein YebG OS	15.38	1	1	1	1	0.729828		0.693663		1.14292		65	7.56204	9.08545
P31080	lexA	LexA repressor OS	37.07	1	4	4	9	0.975212	28.138	0.979753	14.6491	1.1429	21.8806	205	22.835	5.47803
O31806	yndB	Uncharacterized protein YndB OS	36.11	1	6	6	17	0.865026	11.4084	1.22253	22.906	1.14085	17.0791	144	16.1101	4.83057
P54523	dxs	1-deoxy-D-xylulose-5-phosphate synthase OS	24.49	1	10	10	16	0.914832	14.9496	0.877835	13.214	1.1401	20.2019	633	69.5146	6.46826
P38424	engB	Probable GTP-binding protein EngB OS	41.03	1	6	6	18	0.990188	5.87991	0.982986	8.20661	1.13997	16.9165	195	22.0127	9.31982
O34737	ykuN	Probable flavodoxin-1 OS	19.62	1	2	2	7	0.887323	20.2393	0.976617	11.0009	1.13861	25.1653	158	17.7813	4.17041
P71086	perR	Peroxide operon regulator OS	28.97	1	3	3	7	0.936104	22.9199	0.991908	21.142	1.13689	8.55664	145	16.4131	6.354
P39155	ywlE	Low molecular weight protein-tyrosine-phosphatase YwlE OS	21.33	1	4	4	6	0.772996	4.63435	1.01395	7.6154	1.13587	13.1904	150	16.7746	7.10791
P39582	menA	Probable 1,4-dihydroxy-2-naphthoate octaprenyltransferase OS	5.14	1	1	1	1	0.892869		1.12687		1.13544		311	33.816	9.1001
O32165	sufD	FeS cluster assembly protein SufD OS	46.68	1	19	19	114	0.944548	5.60201	1.02162	11.3994	1.13503	19.0546	437	48.2637	5.2749
O31717	ykpB	Uncharacterized oxidoreductase YkpB OS	5.28	1	1	1	2	0.922373	8.91142	1.11109	4.29194	1.13271	6.71451	303	33.5513	6.60986
P39810	flgK	Flagellar hook-associated protein 1 OS	5.33	1	1	1	1	0.88723		0.641596		1.12933		507	54.3219	4.69092
O32264	yvcT	Probable 2-ketogluconate reductase OS	27.38	1	6	6	10	1.15744	15.2881	1.42085	22.5218	1.12891	22.8384	325	36.5958	5.38916
P37551	purR	Pur operon repressor OS	7.02	1	1	1	1	1.39844		1.10385		1.12852		285	31.2094	6.11279
P39624	spsD	Spore coat polysaccharide biosynthesis protein SpsD OS	4.84	1	1	1	1	0.970249		0.42613		1.12715		289	33.1199	6.44287
O34709	yvbF	Putative HTH-type transcriptional regulator YvbF OS	8.65	1	1	1	1	0.616388		0.99969		1.12578		185	21.7372	6.23975
P54482	ispG	4-hydroxy-3-methylbut-2-en-1-yl diphosphate synthase OS	38.99	1	11	11	18	1.05055	4.45081	1.0928	8.19093	1.12521	10.0492	377	40.5578	7.1958
P54522	xseB	Exodeoxyribonuclease 7 small subunit OS	51.19	1	3	3	9	0.810393	6.91529	0.883048	2.66404	1.12518	36.7088	84	9.6246	4.44971
P40403	cheC	CheY-P phosphatase CheC OS	9.57	1	1	1	2	0.795711	8.2929	0.786932	1.81161	1.12375	5.38914	209	23.0344	4.37354
P46898	rplF	50S ribosomal protein L6 OS	66.48	1	12	12	124	0.801146	7.49021	0.991973	12.3324	1.12249	13.3877	179	19.4974	9.49561
P39802	cheW	Chemotaxis protein CheW OS	19.87	1	3	3	3	0.89613	5.33929	0.8082	10.498	1.1194	30.2767	156	17.4942	4.70361
P07343	fumC	Fumarate hydratase class II OS	44.81	1	17	17	45	1.07632	9.23719	1.14012	14.0828	1.11927	21.5874	462	50.4997	5.84619
O34628	yvlB	Uncharacterized protein YvlB OS	28.77	1	6	6	10	1.22902	11.5777	0.867169	16.6085	1.11885	16.0512	365	41.056	5.74463
P54454	yqeI	Probable RNA-binding protein YqeI OS	46.88	1	4	4	17	0.789897	12.2555	0.929368	14.235	1.11559	25.9425	96	10.7518	9.08545
P26901	katA	Vegetative catalase OS	66.05	1	25	25	100	1.04538	10.5532	1.32333	18.7645	1.11491	18.4277	483	54.7572	6.53662
P54389	ypiA	TPR repeat-containing protein YpiA OS	10.17	1	4	4	5	1.05021	33.7442	1.19141	44.2038	1.1138	14.7942	423	48.291	4.37354
P45871	ywkD	Uncharacterized protein YwkD OS	14.84	1	2	2	2	0.977786	10.8339	0.99359	24.4959	1.10936	1.49836	128	14.8236	5.78271
Q01620	jag	Protein jag OS	12.98	1	3	3	4	0.962604	8.96812	0.797179	5.59725	1.10898	19.0265	208	23.1476	9.62744
P80880	trxB	Thioredoxin reductase OS	45.89	1	11	11	22	1.0754	5.80579	1.18634	12.1758	1.10632	16.3742	316	34.4976	5.23682
Q7WY78	ywtF	Putative transcriptional regulator YwtF OS	16.77	1	4	4	8	1.02652	18.3335	0.840988	23.6181	1.10538	26.9974	322	35.899	9.17334
P39840	galM	Aldose 1-epimerase OS	6.46	1	2	2	3	0.886252	0.118917	1.01111	7.25075	1.10265	39.2121	325	37.2047	6.04932
P28366	secA	Protein translocase subunit SecA OS	41.5	1	29	29	63	1.149	6.82433	0.940073	12.9266	1.1025	18.3708	841	95.4704	5.65576
P37525	yaaB	Uncharacterized protein YaaB OS	39.51	1	2	2	2	1.03514	28.4984	1.03048	3.6621	1.10197	13.96	81	9.20582	9.0415
P35159	rluB	Ribosomal large subunit pseudouridine synthase B OS	25.41	1	7	7	13	1.07025	9.31802	0.851518	12.9407	1.1017	21.6053	244	27.7213	9.84717
P50733	ypbG	Uncharacterized protein YpbG OS	8.49	1	1	1	1	1.1014		0.891646		1.10163		259	28.5419	7.07861
P39576	ilvK	Branched-chain-amino-acid aminotransferase 2 OS	32.51	1	10	10	21	0.844688	15.5021	1.00083	11.7261	1.09991	17.8718	363	40.2668	5.23682
P16971	recA	Protein RecA OS	57.18	1	14	14	58	0.881244	8.57893	1.17566	18.4834	1.09977	15.908	348	38.0356	5.08447
P94548	fadR	Fatty acid metabolism regulator protein OS	15.98	1	2	2	2	0.876328	33.5489	0.889364	44.9821	1.09956	34.77	194	21.9647	6.56592
P40780	ytxH	Uncharacterized protein YtxH OS	29.8	1	6	6	12	0.74332	22.1653	0.882851	9.71961	1.09444	36.0016	151	16.5444	5.50342
Q01463	minC	Septum site-determining protein MinC OS	14.6	1	3	3	4	0.993454	13.6285	1.10172	20.8178	1.09312	11.2033	226	24.982	6.72705
O34392	ytrE	ABC transporter ATP-binding protein YtrE OS	13.42	1	2	2	3	0.79312	12.3392	0.967374	18.9447	1.09238	19.157	231	25.4444	6.44287
P18579	murB	UDP-N-acetylenolpyruvoylglucosamine reductase OS	42.57	1	10	10	27	1.08339	7.19844	1.01599	10.5216	1.08975	9.68861	303	32.7871	6.55127
P37565	hslO	33 kDa chaperonin OS	35.74	1	9	9	20	0.923025	7.2761	1.11716	8.42672	1.08938	34.5728	291	31.7912	4.94482
P71079	fabL	Enoyl-[acyl-carrier-protein] reductase [NADPH] FabL OS	43.6	1	11	11	30	0.959919	8.12068	1.06736	11.0013	1.08681	15.2947	250	27.1612	6.37939
P94512	ysaA	Putative uncharacterized hydrolase YsaA OS	16.54	1	2	2	2	1.63753		1.48561	32.5822	1.08579	18.0055	260	29.562	4.91943
O34678	ytbE	Uncharacterized oxidoreductase YtbE OS	4.29	1	1	1	1	0.763279		0.843596		1.08535		280	31.7481	5.07178
P39912	aroA	Protein AroA(G) OS	52.51	1	16	16	58	0.918692	7.90474	1.08754	11.6265	1.08358	14.7613	358	39.5149	5.65576
P14194	ctc	General stress protein CTC OS	26.47	1	4	4	7	0.604132	15.9408	0.916902	17.6853	1.08324	10.8042	204	22.0421	4.52588
O32223	yvaA	Uncharacterized oxidoreductase YvaA OS	21.23	1	5	5	9	0.873201	9.17726	0.933336	19.4608	1.08057	16.1318	358	40.0875	5.8335
P37812	atpC	ATP synthase epsilon chain OS	45.45	1	6	6	34	0.835239	12.2399	0.867064	8.38292	1.08039	17.2159	132	14.2005	5.60498
P20691	aroE	3-phosphoshikimate 1-carboxyvinyltransferase OS	16.59	1	5	5	7	1.0041	8.86065	1.02472	13.0833	1.07972	22.3845	428	45.2117	6.81494
O07543	yheB	UPF0754 membrane protein YheB OS	19.1	1	6	6	9	0.859607	6.51058	1.0914	12.14	1.07625	6.62977	377	42.8811	8.93896
P37472	hprT	Hypoxanthine-guanine phosphoribosyltransferase OS	61.67	1	10	10	37	0.988166	6.46423	0.981205	7.08542	1.07609	22.397	180	20.2266	4.93213
O34798	yjeA	Uncharacterized protein YjeA OS	1.93	1	1	1	1	1.20608		0.788601		1.07457		467	53.8051	8.79248
P39793	ponA	Penicillin-binding protein 1A/1B OS	16.85	1	14	14	21	1.0092	16.1414	1.00062	10.2481	1.07443	16.017	914	99.502	5.10986
P37580	fhuD	Iron(3+)-hydroxamate-binding protein FhuD OS	34.6	1	8	8	23	0.750542	22.0746	0.894712	9.55736	1.0744	17.3915	315	34.4049	8.82178
P42982	ypjH	Uncharacterized glycosyltransferase YpjH OS	23.08	1	5	5	6	1.33717	60.2307	1.05625	34.8405	1.07357	35.8139	377	41.9521	6.60986
O05251	malR	Transcriptional regulatory protein MalR OS	10.64	1	2	2	3	0.877901	9.51854	0.923981	6.4122	1.07334	7.03229	235	26.9482	6.41748
P42921	rplD	50S ribosomal protein L4 OS	43	1	7	7	40	1.2014	9.12748	0.847879	14.0214	1.07035	17.0986	207	22.3772	10.0229
O32082	yubF	Uncharacterized membrane protein YubF OS	16.09	1	1	1	1	1.03066		0.965562		1.06939		87	10.0051	5.99854
O31718	ykzG	UPF0356 protein YkzG OS	66.67	1	4	4	11	0.824908	2.22358	1.05466	11.5082	1.06917	14.7946	69	8.24724	4.84326
P14205	yuxO	Putative esterase ComA2 OS	14.29	1	1	1	1	0.766082		1.20613		1.0689		126	13.6721	6.7124
O32023	yqzC	Uncharacterized protein YqzC OS	31.82	1	3	3	4	1.06019	10.4201	1.09603	9.89958	1.06548	9.72761	154	17.0168	7.23975
P37560	yabR	Uncharacterized protein YabR OS	46.09	1	5	5	12	0.756278	3.16199	0.817084	7.80077	1.06395	14.0351	128	14.1865	9.83252
P42974	ahpF	NADH dehydrogenase OS	34.97	1	16	16	40	0.9962	6.30473	1.23708	13.9356	1.06369	18.9423	509	54.8399	4.99561
P46922	opuAC	Glycine betaine-binding protein OpuAC OS	22.53	1	5	5	9	0.782242	13.3285	0.911829	1.03765	1.06257	21.8266	293	32.1944	7.97217
O34403	mutM	Formamidopyrimidine-DNA glycosylase OS	11.23	1	2	2	2	0.908914	32.4498	1.15115	49.8601	1.06252	46.75	276	30.9821	8.89502
O31850	yojN	Uncharacterized protein YojN OS	19.41	1	4	4	17	1.15584	24.179	1.32328	19.6231	1.06211	10.0411	304	33.4594	5.23682
P40399	rsbU	Phosphoserine phosphatase RsbU OS	9.85	1	2	2	3	0.983409	4.33843	1.13629	12.9931	1.06182	8.75952	335	38.6063	5.22412
C0SPB0	ytcI	Uncharacterized acyl--CoA ligase YtcI OS	27.41	1	15	15	29	0.950832	7.14967	1.28493	16.1159	1.06098	24.2117	529	59.2876	6.62451
P21882	pdhB	Pyruvate dehydrogenase E1 component subunit beta OS	65.23	1	24	24	179	0.998747	7.88029	1.01993	13.0452	1.0604	14.2172	325	35.4523	4.84326
P94462	defA	Peptide deformylase 1 OS	44.38	1	7	7	8	0.968597	8.87258	0.970471	7.7298	1.06016	23.3857	160	17.7641	5.05908
P39846	ppsB	Plipastatin synthase subunit B OS	0.82	1	1	1	2	0.571519	1.81798	0.654711	2.47559	1.05851	1.14629	2560	289.982	5.37646
C0SP85	yukE	Uncharacterized protein YukE OS	79.38	1	4	4	12	1.00809	6.70614	1.42651	15.349	1.05805	4.23374	97	10.9864	4.52588
P97032	yhbD	Uncharacterized protein YhbD OS	4.2	1	1	1	1	0.856088		1.21228		1.05795		238	27.035	5.5542
Q04385	ygxA	Uncharacterized protein YgxA OS	26.53	1	6	6	10	0.95191	14.0486	0.91087	7.9933	1.05684	20.3526	294	34.3748	6.26514
O34321	yocM	Uncharacterized protein YocM OS	13.29	1	1	1	1	0.904065		0.730501		1.05671		158	18.471	5.38916
O31584	yfhQ	Probable A/G-specific adenine glycosylase YfhQ OS	10.03	1	2	2	3	1.18137	11.8365	1.10092	12.5924	1.05594	5.91466	369	41.9368	6.45557
P32399	yhgE	Uncharacterized protein YhgE OS	13.16	1	9	9	12	0.997749	18.9217	1.50264	23.3427	1.05515	16.483	775	84.0416	5.35107
O32052	yrbF	UPF0092 membrane protein YrbF OS	31.46	1	2	2	4	0.775661	6.86462	0.995003	10.1711	1.05507	12.9368	89	9.89733	9.24658
O31562	yfiT	Putative metal-dependent hydrolase YfiT OS	9.55	1	1	1	2	1.09367	0.214062	0.619998	0.529782	1.05457	1.721	178	20.6535	7.07861
O32219	cadA	Cadmium, zinc and cobalt-transporting ATPase OS	1.42	1	1	1	1	0.648249		1.03102		1.05454		702	75.3578	6.43018
P71043	ywnH	Putative phosphinothricin acetyltransferase YwnH OS	25.15	1	3	3	4	1.11098	4.67419	1.2126	5.50789	1.05275	12.5761	163	18.3522	5.57959
P37940	bfmBAA	2-oxoisovalerate dehydrogenase subunit alpha OS	26.97	1	7	7	22	1.09999	17.5404	1.3478	34.4197	1.0487	32.5429	330	36.3108	5.08447
O06973	yvcJ	UPF0042 nucleotide-binding protein YvcJ OS	29.83	1	6	6	12	1.15623	21.9827	1.10724	17.5871	1.04782	19.0198	295	33.8295	7.12256
P54547	zwf	Glucose-6-phosphate 1-dehydrogenase OS	40.7	1	19	19	83	1.13253	14.051	1.13241	11.0952	1.04599	14.559	489	55.5969	5.63037
O34827	ykuM	Uncharacterized HTH-type transcriptional regulator YkuM OS	8.19	1	2	2	2	1.15734		1.81917		1.04567		293	33.8906	6.39209
O34542	yflK	Uncharacterized protein YflK OS	9.5	1	2	2	2	0.882224	26.0386	1.04194	21.5947	1.04531	19.2248	221	24.8188	7.85498
P06224	sigA	RNA polymerase sigma factor RpoD OS	38.81	1	14	14	23	1.07648	10.01	0.825932	9.22683	1.04449	18.1862	371	42.922	4.86865
P37876	ytxK	Uncharacterized protein YtxK OS	39.82	1	11	11	18	1.00426	4.73309	1.13421	11.9514	1.04366	9.94489	329	37.3273	5.79541
Q45597	fbp	Fructose-1,6-bisphosphatase class 3 OS	11.08	1	6	6	8	1.71398	11.4922	1.31422	24.5343	1.04328	15.6514	641	74.4459	5.65576
P42409	rsbRA	RsbT co-antagonist protein RsbRA OS	20.07	1	4	4	6	1.05778	18.2986	1.06082	13.7299	1.04288	12.443	274	31.0304	4.99561
P29072	cheA	Chemotaxis protein CheA OS	10.71	1	5	5	5	1.06477	6.82156	0.8455	14.8674	1.04276	37.3674	672	74.7655	4.76709
Q45062	yneQ	Uncharacterized protein YneQ OS	14.14	1	1	1	1	0.694025		1.04396		1.04255		99	11.7371	8.1626
O34809	yceG	Uncharacterized protein YceG OS	12.85	1	5	5	5	1.02895	13.5739	1.02712	25.7042	1.04161	22.6191	537	62.7342	6.43018
P12921	tmrB	Tunicamycin resistance protein OS	7.61	1	1	1	1	0.970712		0.870155		1.04122		197	22.7159	9.23193
P25971	pyrF	Orotidine 5'-phosphate decarboxylase OS	15.48	1	3	3	5	0.92174	0.6824	0.908362	7.4021	1.03935	13.4726	239	25.9757	6.23975
P94356	yxkC	Uncharacterized protein YxkC OS	48.33	1	9	9	45	0.415295	14.1227	0.686113	8.78387	1.03843	19.9813	180	19.3922	8.63135
P54495	glcK	Glucokinase OS	12.15	1	3	3	5	1.17351	20.3796	1.14182	12.8482	1.03721	33.0358	321	33.5825	6.23975
Q02115	lytR	Transcriptional regulator LytR OS	13.07	1	4	4	4	0.987744	2.66509	0.833032	7.67339	1.03666	13.7176	306	34.5648	9.17334
Q07833	wapA	Wall-associated protein OS	3.26	1	6	6	7	1.17041	18.3906	1.00612	39.8576	1.03629	29.7009	2334	258.005	6.50732
P42976	dapB	4-hydroxy-tetrahydrodipicolinate reductase OS	41.57	1	9	9	18	1.02437	7.2163	1.12336	16.6547	1.03628	19.481	267	29.469	5.38916
P54488	yqgF	Uncharacterized protein YqgF OS	11.31	1	6	6	7	1.08961	15.2982	0.97045	7.25685	1.03615	10.6766	716	80.0925	9.21729
P31112	hepS	Heptaprenyl diphosphate synthase component 1 OS	22.31	1	4	4	4	0.972915	17.8659	1.12794	24.0227	1.03608	10.4412	251	29.1041	6.7417
P54493	gluP	Rhomboid protease GluP OS	1.58	1	1	1	1	0.721161		1.09378		1.03397		507	56.4264	5.98584
P37540	holB	DNA polymerase III subunit delta' OS	3.65	1	1	1	1	0.762809		0.864208		1.03311		329	37.5974	6.80029
P50619	ymaB	Uncharacterized protein YmaB OS	19.9	1	3	3	4	0.90824	21.5517	1.07314	28.0556	1.03297	48.569	206	23.3729	4.77979
P80866	yurY	Vegetative protein 296 OS	69.73	1	17	17	84	0.992437	6.868	1.07221	12.0903	1.03264	17.5027	261	29.0126	4.88135
O06967	bmrA	Multidrug resistance ABC transporter ATP-binding/permease protein BmrA OS	12.22	1	6	6	10	0.850045	17.9085	0.959326	11.3829	1.03238	20.5956	589	64.4784	6.91748
P94541	rnhC	Ribonuclease HIII OS	9.9	1	3	3	3	0.94263	6.56688	1.05655	7.56376	1.03018	8.32925	313	34.048	9.65674
P08495	lysC	Aspartokinase 2 OS	3.19	1	1	1	1	1.08377		0.855497		1.02985		408	43.7806	4.93213
O34916	ykuR	N-acetyldiaminopimelate deacetylase OS	16.04	1	5	5	8	0.983213	23.6534	1.13075	13.2095	1.02981	20.0698	374	41.531	5.41455
O07548	yheG	Uncharacterized protein YheG OS	7.77	1	2	2	2	1.06424	8.73371	1.11127	6.81183	1.02967	5.65608	206	22.7927	6.22705
O06972	yvcI	Uncharacterized Nudix hydrolase YvcI OS	44.3	1	6	6	9	1.14976	11.9081	0.853291	19.3275	1.02806	19.4868	158	18.202	5.33838
Q05852	gtaB	UTP--glucose-1-phosphate uridylyltransferase OS	57.88	1	15	15	48	1.04263	8.53227	0.960589	9.91959	1.02741	22.1575	292	33.0493	5.17334
Q45589	ybbP	Uncharacterized protein YbbP OS	6.59	1	2	2	3	1.0595	2.03763	0.957437	20.0778	1.02645	3.97094	273	30.5273	8.07471
O07081	yrdC	Uncharacterized isochorismatase family protein YrdC OS	12.3	1	2	2	3	1.11672	3.83283	0.970641	5.89993	1.02634	33.2849	187	21.2368	5.40186
P80241	yflT	General stress protein 17M OS	10.43	1	1	1	1	0.541357		0.726279		1.02544		115	13.1036	5.10986
O06476	yfmR	Uncharacterized ABC transporter ATP-binding protein YfmR OS	16.22	1	9	9	15	1.21512	6.22641	0.943528	10.3628	1.02486	10.6194	629	71.0765	5.26221
P21881	pdhA	Pyruvate dehydrogenase E1 component subunit alpha OS	70.62	1	25	25	161	1.02971	8.75508	1.00301	14.1611	1.02447	21.4282	371	41.5223	6.22705
O05494	ydhC	Uncharacterized HTH-type transcriptional regulator YdhC OS	11.16	1	2	2	2	0.921897	5.53013	1.1427	7.13548	1.02399	7.30844	224	26.3797	6.23975
P23453	fliM	Flagellar motor switch protein FliM OS	3.31	1	1	1	1	0.953678		0.789791		1.02232		332	37.5052	4.95752
O07624	ywiB	Uncharacterized beta-barrel protein YwiB OS	20.42	1	1	1	2	1.40056		0.987773		1.02206		142	16.1471	6.02393
O07605	gltT	Proton/sodium-glutamate symport protein OS	2.1	1	1	1	4	0.835966	7.17229	1.13976	3.65739	1.02078	5.61421	429	45.89	8.79248
P35164	resE	Sensor histidine kinase ResE OS	10.87	1	4	4	6	1.16683	22.7606	0.83103	15.679	1.02056	21.2893	589	66.7296	5.70654
P42239	ycbG	Uncharacterized HTH-type transcriptional regulator YcbG OS	4.29	1	1	1	2	0.932011		0.86878		1.02028		233	26.5659	6.62451
O32193	cssS	Sensor histidine kinase CssS OS	2.44	1	1	1	1	1.18951		1.45992		1.0189		451	52.0646	6.21436
P46899	rplR	50S ribosomal protein L18 OS	32.5	1	4	4	25	0.813733	9.17751	0.888349	16.6109	1.01828	14.7727	120	12.961	10.1108
Q06753	yacO	Putative TrmH family tRNA/rRNA methyltransferase YacO OS	24.1	1	6	6	15	0.932069	8.54195	1.01885	10.3661	1.01552	10.6293	249	27.4914	8.47021
P12877	rplE	50S ribosomal protein L5 OS	78.21	1	14	14	197	0.935743	6.53832	0.961162	13.828	1.01313	21.6265	179	20.1347	9.53955
O34527	cymR	HTH-type transcriptional regulator CymR OS	45.65	1	3	3	10	0.867702	25.9159	0.961269	19.6492	1.0129	14.4239	138	15.2459	4.93213
Q03222	rho	Transcription termination factor Rho OS	24.36	1	10	10	27	1.02972	7.35188	0.941566	6.84527	1.01249	17.6854	427	48.5984	6.99072
P0CI78	rplX	50S ribosomal protein L24 OS	75.73	1	9	9	48	0.8201	5.18922	1.05608	8.67505	1.01211	19.3696	103	11.1351	10.0376
P49786	accB	Biotin carboxyl carrier protein of acetyl-CoA carboxylase OS	59.12	1	4	4	32	0.959972	23.3229	1.07143	16.6041	1.00944	35.2303	159	17.2178	4.60205
O35005	ytrF	ABC transporter permease YtrF OS	14.68	1	6	6	11	0.834628	11.9702	0.870521	8.84589	1.00935	21.9339	436	48.3901	8.26514
P25814	rnpA	Ribonuclease P protein component OS	18.97	1	2	2	2	0.916129	24.8735	0.780058	7.9852	1.00901	3.03761	116	13.7916	10.3452
Q45495	defB	Peptide deformylase 2 OS	52.17	1	9	9	20	1.0212	8.07784	1.18892	19.6183	1.00712	19.7572	184	20.6426	5.8208
P54394	dinG	Probable ATP-dependent helicase DinG homolog OS	4.94	1	3	3	3	1.27189	13.8216	0.843279	4.46043	1.00625	57.7093	931	105.966	6.26514
O34876	ftsX	Cell division protein FtsX OS	22.3	1	6	6	13	0.931846	11.442	0.922456	4.35661	1.00618	24.0329	296	33.0781	9.5835
P54476	nfo	Probable endonuclease 4 OS	27.95	1	6	6	11	0.91859	8.02488	1.04519	16.5956	1.00357	28.083	297	33.0479	5.74463
O32167	metQ	Methionine-binding lipoprotein MetQ OS	63.87	1	15	15	45	0.932198	13.0775	0.842753	16.8625	1.00276	22.1468	274	30.3361	8.30908
P70976	ybaJ	Uncharacterized methyltransferase YbaJ OS	11.37	1	2	2	2	0.866873	0.720489	0.923475	4.38235	1.00233	4.67414	255	28.3637	5.65576
P39779	codY	GTP-sensing transcriptional pleiotropic repressor CodY OS	53.67	1	12	12	32	0.951965	15.484	1.07666	8.95904	1.00192	19.0799	259	28.9951	4.99561
P94542	zapA	Cell division protein ZapA OS	38.82	1	2	2	2	0.771748	1.0319	1.09605	36.3012	1.00116	0.601983	85	9.8601	7.43018
O34338	mntB	Manganese transport system ATP-binding protein MntB OS	37.2	1	8	8	23	0.914745	8.52813	0.88029	5.74688	1.00092	8.72937	250	27.8638	9.08545
O34353	ydjN	Uncharacterized protein YdjN OS	4.31	1	1	1	1	0.954381		0.744754		1.00083		348	39.6863	7.53271
P21475	rpsR	30S ribosomal protein S18 OS	17.72	1	2	2	2	1.0749	12.4283	0.908189	0.0302913	1.00082	57.2524	79	8.96394	11.0337
P96596	ydbA	Uncharacterized protein YdbA OS	5.88	1	1	1	1	0.995402		0.868675		0.999962		272	31.2255	8.86572
P96630	immA	Metallopeptidase ImmA OS	8.28	1	1	1	1	0.997939		0.769196		0.999218		169	19.3891	8.38232
P37494	yybJ	Uncharacterized ABC transporter ATP-binding protein YybJ OS	11.93	1	2	2	4	0.825182	11.7919	0.721652	22.9605	0.997307	6.73506	218	24.2571	8.47021
P42956	mtlA	PTS system mannitol-specific EIICB component OS	9.21	1	3	3	4	0.788634	8.40891	0.847842	22.785	0.996402	21.6991	478	50.1528	8.79248
O34635	sdaAB	Probable L-serine dehydratase, beta chain OS	23.18	1	4	4	6	1.0153	11.86	0.851668	11.0818	0.995656	15.4331	220	23.8045	5.45264
P96672	ydeO	UPF0750 membrane protein YdeO OS	9.31	1	2	2	3	0.758553		1.13009		0.995544		290	31.4082	8.51416
P37954	uvrB	UvrABC system protein B OS	4.69	1	3	3	3	1.44938	25.6589	1.0137	21.0155	0.99503	34.8136	661	76.2795	5.56689
P37811	atpH	ATP synthase subunit delta OS	32.04	1	4	4	13	0.929107	10.5467	0.940274	12.9524	0.994743	5.06659	181	19.9698	9.17334
P31102	aroB	3-dehydroquinate synthase OS	21.82	1	5	5	7	1.05732	29.8332	0.91844	27.7959	0.994619	24.8103	362	40.791	7.34229
P54948	yxeI	Uncharacterized protein YxeI OS	7.32	1	2	2	2	0.886996	17.0903	1.11213	2.33329	0.993667	16.462	328	37.1036	5.63037
O31703	moeA	Molybdopterin molybdenumtransferase OS	17.44	1	5	5	11	0.982414	8.07589	1.00106	9.52298	0.993074	8.22618	430	46.5901	6.01123
P39795	treA	Trehalose-6-phosphate hydrolase OS	43.67	1	25	25	83	1.40709	8.75136	0.876688	9.81663	0.992863	11.656	561	65.1425	5.23682
Q01466	mreC	Cell shape-determining protein MreC OS	29.31	1	8	8	19	1.0421	20.771	0.945509	16.6137	0.99265	21.0502	290	32.1208	7.31299
O32022	yqzD	Uncharacterized protein YqzD OS	11.97	1	1	1	1	0.952226		0.765067		0.992133		117	13.3151	5.2876
P37524	noc	Nucleoid occlusion protein OS	24.03	1	5	5	7	1.02028	38.9035	0.88392	23.712	0.989797	40.2686	283	32.7744	6.21436
P54460	prmA	Ribosomal protein L11 methyltransferase OS	16.08	1	4	4	8	0.967832	7.97639	1.08432	6.32789	0.989316	17.256	311	34.5098	4.76709
O32095	yueF	UPF0118 membrane protein YueF OS	1.9	1	1	1	1	0.818376		0.881614		0.988796		369	40.8699	9.68604
P0CI80	xylA	Xylose isomerase OS	3.15	1	1	1	1	0.842222		1.23416		0.987692		445	50.2499	6.16357
P12873	rpmC	50S ribosomal protein L29 OS	57.58	1	5	5	52	0.961292	4.96574	0.991619	8.58066	0.987485	9.16177	66	7.70826	10.0962
P39758	abh	Putative transition state regulator Abh OS	28.26	1	4	4	23	1.02607	8.19398	0.81477	7.02671	0.9869	13.8446	92	10.2495	6.1001
P49852	hmp	Flavohemoprotein OS	8.27	1	2	2	3	1.22361	23.9095	0.726182	2.36235	0.981931	9.9847	399	44.7009	6.15088
O34318	yloU	Uncharacterized protein YloU OS	9.17	1	1	1	2	0.867865		1.14373		0.980795		120	13.1818	7.32764
P39646	pta	Phosphate acetyltransferase OS	67.8	1	19	19	98	0.912372	9.01332	0.939784	13.7571	0.980142	22.7404	323	34.769	4.93213
Q45614	yycG	Sensor histidine kinase YycG OS	8.18	1	4	4	4	1.13281	8.84827	0.842928	6.83692	0.97914	13.2453	611	69.9901	5.07178
O34475	yfkO	Putative NAD(P)H nitroreductase YfkO OS	33.03	1	7	7	27	1.19944	9.10399	1.10246	9.41773	0.978486	13.9862	221	25.612	6.0874
O32187	yusU	Uncharacterized protein YusU OS	10.53	1	1	1	1	0.69834		0.784188		0.978375		95	11.275	8.88037
O34484	mapB	Methionine aminopeptidase 2 OS	34.54	1	6	6	14	1.10958	7.84092	1.12122	19.6488	0.977777	14.7673	249	27.194	5.98584
P42411	rsbT	Serine/threonine-protein kinase RsbT OS	40.6	1	5	5	5	0.876463	5.78318	1.04394	5.14997	0.976814	14.0364	133	14.3405	6.75635
P37105	ffh	Signal recognition particle protein OS	61.88	1	23	23	49	0.95422	9.5061	0.914491	13.3212	0.976617	16.7258	446	49.5091	8.93896
O31446	ybfF	Uncharacterized protein YbfF OS	10.23	1	2	2	2	0.781011	16.0434	0.944357	14.3052	0.975613	23.2159	303	35.2866	9.34912
O31857	yojG	Uncharacterized deacetylase YojG OS	25.34	1	5	5	9	1.27408	10.776	1.07054	13.2769	0.975186	18.8722	221	25.5608	4.98291
O32229	yvaG	Uncharacterized oxidoreductase YvaG OS	7.2	1	2	2	3	0.946293	5.96537	1.14772	9.26901	0.974776	8.4129	264	28.9908	4.98291
O31775	ymdB	Uncharacterized protein ymdB OS	43.94	1	7	7	15	0.967606	14.3971	1.02229	19.7101	0.973088	19.8381	264	29.2703	6.97607
O34951	bceR	Sensory transduction protein BceR OS	4.76	1	1	1	2	1.16038	2.63335	1.03571	0.201644	0.972471	6.67976	231	26.8497	5.66846
P53001	aspB	Aspartate aminotransferase OS	45.04	1	12	12	52	1.22124	10.7707	1.10417	11.247	0.969445	13.0321	393	43.0611	5.59229
P94431	ycnI	Uncharacterized protein YcnI OS	21.08	1	2	2	2	0.861121	36.1128	0.799798	8.25041	0.968947	8.2238	204	22.0991	5.16064
O32214	cysJ	Sulfite reductase [NADPH] flavoprotein alpha-component OS	7.77	1	2	2	2	0.96294		1.05344		0.968861		605	67.2174	4.83057
P14577	rplP	50S ribosomal protein L16 OS	47.22	1	6	6	50	0.944087	21.5775	0.851081	23.4368	0.968376	28.5649	144	16.1798	10.4038
P96605	ydbJ	Uncharacterized ABC transporter ATP-binding protein YdbJ OS	29.87	1	8	8	9	0.931225	13.9072	0.957772	3.95616	0.968044	8.38564	308	34.2548	4.99561
P31114	hepT	Heptaprenyl diphosphate synthase component 2 OS	17.53	1	5	5	6	0.958449	15.3926	1.11217	10.0976	0.967975	6.72559	348	39.4907	6.72705
P21465	rpsC	30S ribosomal protein S3 OS	70.18	1	22	22	103	1.03417	8.67952	0.875518	10.4952	0.966058	13.0587	218	24.3079	9.75928
P09124	gapA	Glyceraldehyde-3-phosphate dehydrogenase 1 OS	57.01	1	14	14	180	1.0287	21.8465	1.0167	18.8559	0.965836	11.9786	335	35.8103	5.35107
P94584	fabZ	3-hydroxyacyl-[acyl-carrier-protein] dehydratase FabZ OS	23.4	1	3	3	12	0.836074	5.90349	0.960083	12.7774	0.965159	11.3445	141	15.7303	6.32861
P46919	gpsA	Glycerol-3-phosphate dehydrogenase [NAD(P)+] OS	42.32	1	11	11	16	1.06649	14.4593	1.00435	10.7899	0.964553	33.2087	345	37.4126	6.69775
P39756	fdhD	Protein FdhD homolog OS	3.05	1	1	1	1	0.908919		1.06472		0.96179		262	29.2711	6.63916
O34981	dapH	2,3,4,5-tetrahydropyridine-2,6-dicarboxylate N-acetyltransferase OS	38.98	1	9	9	30	1.0078	7.10161	1.06114	5.32234	0.961488	12.9891	236	24.945	4.95752
P37474	mfd	Transcription-repair-coupling factor OS	9.09	1	8	8	10	1.21418	7.59544	0.934074	16.1767	0.960257	16.9658	1177	133.729	5.69385
O34641	ytrB	ABC transporter ATP-binding protein YtrB OS	3.42	1	1	1	1	1.35915		1.28862		0.958522		292	33.7979	5.84619
O30509	gatB	Aspartyl/glutamyl-tRNA(Asn/Gln) amidotransferase subunit B OS	42.23	1	18	18	62	1.03857	11.7712	1.02783	7.54669	0.957726	14.9388	476	53.5196	5.14795
P39217	tlpB	Methyl-accepting chemotaxis protein TlpB OS	6.95	2	2	5	13	0.638792	20.9481	0.871858	32.8894	0.954707	35.1668	662	71.4918	4.99561
O34452	yrrB	TPR repeat-containing protein YrrB OS	13.11	1	3	3	7	0.884121	6.75438	0.991427	8.26877	0.953777	6.03247	206	23.0773	4.61475
O31612	ppnK1	Probable inorganic polyphosphate/ATP-NAD kinase 1 OS	11.28	1	3	3	4	1.16428	6.14325	1.21778	9.07823	0.953441	6.42984	266	29.9934	6.45557
O34925	deoD	Purine nucleoside phosphorylase DeoD-type OS	44.21	1	8	8	19	1.15182	28.377	0.96682	22.5118	0.952421	14.9311	233	25.3618	5.31299
P37539	yaaR	Uncharacterized protein YaaR OS	6.85	1	1	1	1	0.866371		1.12405		0.948361		146	16.7079	9.24658
P54608	yhcX	UPF0012 hydrolase YhcX OS	6.43	1	3	3	3	1.27547	9.60551	1.05899	10.6549	0.947434	15.9698	513	60.1801	5.70654
P37478	yycF	Transcriptional regulatory protein YycF OS	35.32	1	7	7	15	1.2307	13.4719	0.875497	9.51798	0.947015	18.0116	235	27.209	5.18604
O34328	gmk	Guanylate kinase OS	39.71	1	7	7	13	1.22113	14.0875	0.907392	8.30151	0.946565	16.8373	204	23.2038	4.88135
O34664	thiN	Thiamine pyrophosphokinase OS	6.07	1	1	1	1	0.934427		1.15021		0.945886		214	24.0835	5.60498
P71037	ywnB	Uncharacterized protein YwnB OS	14.08	1	3	3	4	0.92189	11.0821	0.84959	5.45855	0.945742	12.1647	213	23.1819	5.47803
P39153	ywlC	Probable tRNA threonylcarbamoyladenosine biosynthesis protein YwlC OS	21.68	1	5	5	6	0.934285	7.22251	1.04828	23.0834	0.944897	54.6184	346	36.9843	6.25244
P39796	treR	Trehalose operon transcriptional repressor OS	13.87	1	2	2	2	1.02853	28.6659	0.855103	0.237617	0.944656	15.3373	238	27.8244	7.23975
P28612	motB	Motility protein B OS	4.6	1	1	1	1	0.458673		0.469272		0.944636		261	29.4644	7.06396
O32168	metP	Methionine import system permease protein MetP OS	4.95	1	1	1	1	0.841803		0.763583		0.943796		222	23.7413	6.7417
O32053	tgt	Queuine tRNA-ribosyltransferase OS	39.37	1	10	10	34	0.915606	9.56196	0.990821	11.0987	0.943708	25.6376	381	43.6827	6.60986
P54947	yxeH	Uncharacterized protein YxeH OS	38.15	1	6	6	21	1.02007	16.3953	1.07814	13.3267	0.942834	22.6167	270	30.2042	4.93213
O34507	prkC	Serine/threonine-protein kinase PrkC OS	4.32	1	2	2	2	1.24191	0.497819	0.957976	26.0192	0.942217	6.49149	648	71.8221	5.12256
O34399	gltB	Glutamate synthase [NADPH] small chain OS	19.47	1	9	9	18	1.3138	10.1306	0.87048	10.5108	0.941169	13.7219	493	54.828	7.60596
P37530	dgk	Deoxyguanosine kinase OS	26.09	1	5	5	7	0.948052	26.4063	0.896208	15.5827	0.939334	11.52	207	24.1296	6.22705
P39821	proA	Gamma-glutamyl phosphate reductase OS	17.59	1	5	5	8	1.07428	8.11979	0.927021	13.4591	0.938262	13.1692	415	45.2237	5.32568
P12041	purQ	Phosphoribosylformylglycinamidine synthase 1 OS	5.29	1	1	1	2	0.48573	12.3091	0.833497	0.150623	0.93797	60.6281	227	24.7683	4.93213
Q03223	rpmE	50S ribosomal protein L31 OS	12.12	1	1	1	3	0.766226	6.51716	0.691225	14.4633	0.937718	6.11018	66	7.43868	9.01221
Q08432	patB	Cystathionine beta-lyase PatB OS	9.82	1	3	3	5	1.1622	13.2538	1.0444	11.7958	0.937629	23.1937	387	42.7616	5.8335
P42971	pbpC	Penicillin-binding protein 3 OS	19.31	1	11	11	13	1.12671	9.40943	0.715124	11.5291	0.93573	8.46381	668	74.3602	6.63916
P45708	yneF	UPF0154 protein YneF OS	33.33	1	2	2	2	0.778449	19.2934	0.996901	4.92784	0.934225	28.5946	72	8.29332	10.5796
O34634	yrrK	Putative Holliday junction resolvase OS	13.77	1	2	2	2	0.805963	15.9259	0.96977	1.00226	0.934017	21.1848	138	15.2	5.63037
P39765	pyrR	Bifunctional protein PyrR OS	23.76	1	4	4	5	1.02592	6.4999	0.938266	8.80491	0.933621	19.5333	181	20.2507	5.33838
O34885	ydiS	Type-2 restriction enzyme BsuMI component YdiS OS	14.87	1	4	4	5	1.05196	7.03578	0.981894	14.3345	0.933016	13.1097	343	40.0076	8.42627
O31749	pyrH	Uridylate kinase OS	27.5	1	5	5	17	0.751219	7.28918	0.827976	9.32851	0.931309	22.1139	240	26.0665	5.38916
O34553	ytsP	Protein YtsP OS	23.93	1	5	5	15	0.960935	9.61983	1.07949	14.0293	0.930225	10.9527	163	18.057	4.70361
O35013	ytkD	Putative 8-oxo-dGTP diphosphatase YtkD OS	14.56	1	2	2	3	0.801877	0.664523	0.80254	7.2732	0.92879	20.3037	158	18.5005	6.354
P04969	rpsK	30S ribosomal protein S11 OS	64.12	1	8	8	63	0.973178	9.00888	0.754976	12.9056	0.928623	18.664	131	13.9165	11.6343
P39610	pdxK	Pyridoxine kinase OS	37.27	1	8	8	29	0.901759	13.6769	0.980211	9.15597	0.925704	8.59749	271	28.9988	5.23682
O06965	yvcA	Putative lipoprotein YvcA OS	7.05	1	1	1	1	0.753394		0.825093		0.924537		241	27.8538	7.06396
O34777	ohrR	Organic hydroperoxide resistance transcriptional regulator OS	25.17	1	3	3	3	0.758222	41.4713	1.16688	16.6889	0.924059	39.9597	147	16.992	6.80029
O34667	luxS	S-ribosylhomocysteine lyase OS	40.13	1	5	5	13	1.01314	8.67656	1.09309	8.11392	0.922487	16.7175	157	17.7028	5.51611
O31618	thiG	Thiazole synthase OS	7.03	1	1	1	1	1.28273		0.921152		0.92234		256	27.0051	5.0083
P29252	folK	2-amino-4-hydroxy-6-hydroxymethyldihydropteridine pyrophosphokinase OS	16.17	1	2	2	3	1.04908	26.8099	0.787451	21.1405	0.921927	10.2712	167	19.0467	4.77979
P37253	ilvC	Ketol-acid reductoisomerase OS	12.87	1	3	3	3	0.51988	9.73455	0.882968	10.2523	0.921207	8.07965	342	37.4342	5.70654
P45941	yqcF	Uncharacterized protein YqcF OS	16.67	1	3	3	6	1.15404	14.087	0.819245	30.0273	0.921195	17.8291	192	21.4627	4.58936
P42920	rplC	50S ribosomal protein L3 OS	61.24	1	12	12	86	0.990265	7.9887	0.791217	15.974	0.920305	24.2358	209	22.6692	9.83252
O07638	ylaN	UPF0358 protein YlaN OS	35.48	1	4	4	9	0.936264	3.40687	0.919714	8.35682	0.9198	10.3273	93	10.7355	4.94482
O31567	yfiY	Probable siderophore-binding lipoprotein YfiY OS	51.69	1	12	12	29	0.764073	11.2844	1.11362	13.5029	0.91834	16.9929	325	36.2816	7.38623
O32208	yvgL	Putative ABC transporter substrate-binding lipoprotein YvgL OS	5.77	1	1	1	2	0.839872		0.774819		0.918301		260	28.3375	5.42725
P12946	ctaA	Heme A synthase OS	3.27	1	1	1	1	0.746254		0.831939		0.917742		306	34.0624	9.42236
O32164	csd	Probable cysteine desulfurase OS	39.9	1	12	12	31	1.00154	9.57162	1.046	12.1758	0.91764	17.757	406	44.8937	5.5542
O31454	ybfN	Uncharacterized protein YbfN OS	8.7	1	1	1	1	0.464077		0.888398		0.916482		92	11.0245	4.84326
Q07868	pbpB	Penicillin-binding protein 2B OS	8.94	1	6	6	6	0.932848	10.9398	0.888738	10.1581	0.915173	12.1461	716	79.2708	8.89502
P94421	yclQ	Uncharacterized ABC transporter solute-binding protein YclQ OS	31.55	1	8	8	25	0.781713	11.9781	0.929098	14.2439	0.914851	25.9565	317	34.7701	7.04932
P06567	dnaI	Primosomal protein DnaI OS	10.29	1	3	3	6	0.994076	7.43405	0.92808	10.6607	0.914633	32.4452	311	36.0911	6.13818
Q45068	alsT	Amino-acid carrier protein AlsT OS	16.99	1	6	6	12	0.701064	16.4088	0.703757	31.4431	0.914379	16.5027	465	50.2677	9.12939
O34866	yodJ	Putative carboxypeptidase YodJ OS	31.87	1	7	7	14	1.01159	8.96564	1.01799	14.1101	0.913553	24.8975	273	30.8345	6.18896
P54555	dsdA	Probable D-serine dehydratase OS	3.13	1	1	1	1	1.10928		0.890085		0.913471		448	49.7002	5.8335
P31113	ubiE	Demethylmenaquinone methyltransferase OS	6.44	1	1	1	1	0.710888		1.22114		0.913283		233	26.5592	8.19189
O32162	sufB	FeS cluster assembly protein SufB OS	61.51	1	21	21	70	1.01671	7.05585	1.07296	12.4649	0.913238	15.0293	465	52.6961	5.21143
P32726	rimP	Ribosome maturation factor RimP OS	20.51	1	4	4	7	1.15492	4.88637	1.05542	5.77246	0.912956	20.0144	156	17.6131	4.76709
P18158	glpD	Aerobic glycerol-3-phosphate dehydrogenase OS	68.65	1	41	41	223	1.12535	7.21387	0.999803	12.6108	0.912805	13.0399	555	62.5281	8.25049
O32033	udk	Uridine kinase OS	42.18	1	8	8	16	1.00615	15.8028	0.974222	12.8852	0.912529	30.5601	211	24.4717	5.78271
O34589	ykuP	Probable flavodoxin-2 OS	18.54	1	2	2	9	0.824509	6.17438	0.963765	6.56196	0.912473	17.2792	151	16.6318	4.13232
P96704	ydgF	Uncharacterized transporter YdgF OS	2.18	1	1	1	6	0.829966	11.6276	0.844998	9.77512	0.911324	12.6052	458	50.7563	9.12939
P17622	ribT	Protein RibT OS	12.9	1	1	1	1	1.0317		1.01024		0.911052		124	14.5643	6.18896
O31728	sepF	Cell division protein SepF OS	15.89	1	2	2	2	0.910649	14.1588	0.908116	21.0989	0.910393	21.0608	151	17.3756	5.26221
Q01464	minD	Septum site-determining protein MinD OS	32.46	1	7	7	20	1.04237	7.05177	1.06022	23.6727	0.908987	9.87122	268	29.3883	5.32568
O34779	prpC	Protein phosphatase PrpC OS	19.69	1	3	3	4	0.967784	18.627	0.929418	11.5582	0.907421	14.0707	254	27.6567	4.69092
O34814	ftsE	Cell division ATP-binding protein FtsE OS	20.61	1	5	5	8	1.10447	10.0778	0.863554	5.13301	0.90705	25.0529	228	25.6036	8.22119
P37537	tmk	Thymidylate kinase OS	23.11	1	4	4	9	0.972949	9.52596	1.03513	11.5881	0.904618	9.56395	212	23.8514	5.14795
A3F320	-	Transcriptional regulator and biotin acetyl-CoA-carboxylase synthetase (Fragment) OS	9.4	2	2	2	2	0.871594		0.820962		0.903056		319	35.4156	6.66846
P54941	yxeB	Iron(3+)-hydroxamate-binding protein YxeB OS	38.63	1	12	12	33	0.721551	11.4786	0.78869	9.06326	0.903034	13.5491	321	35.4842	6.65381
Q45493	rnjA	Ribonuclease J 1 OS	40.54	1	19	19	63	0.941755	8.62602	1.04749	11.1206	0.902253	15.4953	555	61.4778	6.354
P25811	mnmE	tRNA modification GTPase MnmE OS	15.47	1	5	5	12	0.9353	23.4244	0.893501	7.83049	0.902103	13.2178	459	50.9428	4.91943
Q45549	nrdR	Transcriptional repressor NrdR OS	13.82	1	2	2	2	1.26226		1.00826		0.901461		152	17.9012	8.1626
P28628	sipS	Signal peptidase I S OS	11.96	1	2	2	4	0.868286	3.58436	1.03798	2.9245	0.901416	17.4631	184	21.0339	9.36377
O07596	yheN	Putative polysaccharide deacetylase YheN OS	8.51	1	2	2	2	0.838748		0.731362		0.900318		282	31.7103	8.45557
P94420	yclP	Uncharacterized ABC transporter ATP-binding protein YclP OS	6.75	1	1	1	2	0.759445		0.896145		0.899638		252	28.4568	5.40186
P54535	artP	Arginine-binding extracellular protein ArtP OS	12.55	1	3	3	5	0.984164	1.79983	0.761662	11.5091	0.898263	12.3984	255	28.2945	5.38916
P94459	ppsD	Plipastatin synthase subunit D OS	0.33	1	1	1	7	1.02475	5.59057	0.851411	2.53474	0.898142	3.66825	3603	406.557	5.71924
P54512	mntR	Transcriptional regulator MntR OS	28.17	1	3	3	4	1.17813	7.90748	0.8188	17.789	0.896202	26.0312	142	16.7486	6.04932
P42924	rplW	50S ribosomal protein L23 OS	43.16	1	7	7	34	0.843437	7.81086	0.805594	9.98126	0.895984	27.0723	95	10.9489	9.84717
O31570	yfhB	Uncharacterized isomerase YfhB OS	6.48	1	1	1	1	0.509422		1.25049		0.895825		293	32.109	5.51611
P54470	yqfL	Putative pyruvate, phosphate dikinase regulatory protein OS	32.22	1	6	6	9	0.934229	23.5714	0.921883	19.9624	0.89573	29.7499	270	30.3302	6.18896
O31571	yfhC	Putative NAD(P)H nitroreductase YfhC OS	68.04	1	12	12	35	0.918702	8.78871	0.900432	12.5587	0.895427	11.1321	194	22.4406	8.80713
P27623	tagD	Glycerol-3-phosphate cytidylyltransferase OS	18.6	1	2	2	6	1.16515	17.3255	1.05359	7.94309	0.894611	59.5629	129	15.2619	6.1001
O34788	bdhA	(R,R)-butanediol dehydrogenase OS	43.35	1	14	14	51	1.67893	11.6505	0.807301	9.27157	0.894547	15.127	346	37.3175	5.07178
P42919	rplB	50S ribosomal protein L2 OS	60.65	1	15	15	72	1.38382	15.8515	0.660172	16.0918	0.893342	21.3901	277	30.2553	10.6235
P37550	ispE	4-diphosphocytidyl-2-C-methyl-D-erythritol kinase OS	10.38	1	2	2	3	1.20945	15.9638	0.99043	25.9069	0.893279	20.2605	289	31.6994	6.80029
P80861	yjlD	NADH dehydrogenase-like protein YjlD OS	48.21	1	18	18	59	0.993584	9.15533	1.07057	10.564	0.892479	13.3932	392	41.9272	6.75635
O32127	yutD	Uncharacterized protein YutD OS	17.58	1	1	1	1	1.01209		1.19987		0.890766		91	10.9154	5.47803
P02394	rplL	50S ribosomal protein L7/L12 OS	91.06	1	11	11	127	0.845057	9.99726	0.870219	6.32927	0.88999	12.2814	123	12.7429	4.55127
P32731	rbfA	Ribosome-binding factor A OS	35.9	1	4	4	17	0.817281	10.4256	1.00056	5.96345	0.889941	9.69474	117	13.3792	8.93896
P71012	fruA	PTS system fructose-specific EIIABC component OS	17.64	1	8	8	20	0.816402	8.99753	0.864827	17.6235	0.889084	11.8155	635	67.141	5.56689
P39761	adeC	Adenine deaminase OS	15.25	1	5	5	11	1.00607	20.4367	1.10806	45.3403	0.888687	29.239	577	62.8524	5.08447
P18157	glpK	Glycerol kinase OS	47.58	1	23	23	83	1.12759	8.96341	1.27629	16.8759	0.888595	21.8212	496	55.0456	5.23682
O31676	queD	6-carboxy-5,6,7,8-tetrahydropterin synthase OS	44.52	1	4	4	8	0.893688	15.0978	0.81333	12.316	0.888256	31.9898	146	16.458	6.11279
P35146	aroC	3-dehydroquinate dehydratase OS	16.86	1	5	5	6	0.911788	5.42011	0.867159	4.20129	0.887211	7.25079	255	28.1136	5.19873
P38493	cmk	Cytidylate kinase OS	39.29	1	9	9	22	0.89004	5.2423	0.793293	13.635	0.887138	10.9014	224	25.0812	5.2749
P37810	atpG	ATP synthase gamma chain OS	49.48	1	13	13	61	0.851272	10.1375	0.860206	13.4827	0.886814	14.2638	287	31.6354	7.06396
O05517	rimI	Putative ribosomal-protein-alanine acetyltransferase OS	5.96	1	1	1	1	0.910113		1.02359		0.886737		151	17.3657	6.1001
P50840	ypsC	Putative RNA methyltransferase YpsC OS	6.49	1	3	3	4	1.10503	7.64221	0.82605	13.1511	0.885312	26.1679	385	43.4795	8.03076
P37529	dck	Deoxyadenosine/deoxycytidine kinase OS	8.76	1	2	2	2	1.04461		0.921837		0.884992		217	25.4277	5.93506
P11045	dfrA	Dihydrofolate reductase OS	6.55	1	1	1	1	0.881924		0.945501		0.884971		168	19.1634	5.57959
Q04789	alsS	Acetolactate synthase OS	5.61	1	2	2	2	1.25525	0.698701	0.935962	47.2952	0.884953	70.3095	570	61.9653	5.52881
O31760	rnjB	Ribonuclease J 2 OS	39.82	1	20	20	51	0.78926	12.7434	0.915471	11.2074	0.884306	15.7397	555	61.1367	8.44092
O32125	yutF	Uncharacterized hydrolase YutF OS	21.48	1	3	3	8	1.0669	14.9688	0.9799	16.3819	0.883946	18.0126	256	27.939	4.85596
P37544	rsmI	Ribosomal RNA small subunit methyltransferase I OS	16.78	1	4	4	4	1.1473	11.8923	0.947407	4.0138	0.883415	24.6175	292	33.022	5.87158
P35163	resD	Transcriptional regulatory protein ResD OS	43.75	1	9	9	18	1.14573	7.95533	0.912835	8.38893	0.882721	10.5045	240	27.4983	5.78271
O31980	yomE	SPBc2 prophage-derived uncharacterized protein YomE OS	2.02	1	1	1	1	0.944637		1.11661		0.881195		644	71.0538	6.03662
O32090	pncB	Nicotinate phosphoribosyltransferase OS	18.98	1	9	9	17	1.26949	18.2652	1.02293	12.3762	0.879645	15.5169	490	56.1443	5.40186
P12874	rpsQ	30S ribosomal protein S17 OS	26.44	1	4	4	12	1.10612	10.6483	1.00407	11.0287	0.877747	8.45737	87	10.1926	9.94971
O32188	yusV	Probable siderophore transport system ATP-binding protein YusV OS	6.55	1	2	2	2	0.744664	0.455515	0.858934	0.952612	0.877747	14.9796	275	30.4747	5.66846
P70999	speB	Agmatinase OS	67.59	1	16	16	53	0.887757	10.4771	0.768544	8.12444	0.876843	12.13	290	32.3963	5.07178
P37465	metG	Methionine--tRNA ligase OS	49.1	1	27	27	78	1.1617	6.83998	1.03348	7.67661	0.876678	10.5727	664	76.1401	5.23682
O34962	ytsJ	Probable NAD-dependent malic enzyme 4 OS	52.2	1	15	15	53	0.979233	5.47007	1.00509	10.5034	0.876249	15.6737	410	43.6396	5.36377
O05265	yulF	Uncharacterized oxidoreductase YulF OS	9.45	1	3	3	7	1.05541	8.17394	1.20222	13.2553	0.874832	12.8309	328	36.4922	5.45264
P96613	murF	UDP-N-acetylmuramoyl-tripeptide--D-alanyl-D-alanine ligase OS	30.2	1	8	8	20	1.1025	23.8885	0.793558	12.329	0.873971	47.9993	457	49.6916	5.69385
P51835	ftsY	Signal recognition particle receptor FtsY OS	38.3	1	9	9	16	1.10041	12.6559	0.855589	11.9841	0.873727	26.9298	329	36.3202	5.37646
P50849	pnp	Polyribonucleotide nucleotidyltransferase OS	57.73	1	38	38	122	0.901554	10.5677	0.866682	10.8884	0.873033	10.3249	705	77.4154	5.16064
P94544	polX	DNA polymerase/3'-5' exonuclease PolX OS	21.05	1	9	9	10	1.19454	16.1412	0.810632	17.4031	0.872711	31.6566	570	64.0801	5.64307
P37486	yybR	Uncharacterized HTH-type transcriptional regulator YybR OS	8	1	1	1	1	1.36761		0.859227		0.872193		125	14.7216	8.41162
P42105	yxaF	Uncharacterized HTH-type transcriptional regulator YxaF OS	25.65	1	4	4	7	1.06507	17.4261	1.03685	14.8788	0.87218	17.4124	191	21.066	6.55127
P39645	ywfI	UPF0447 protein YwfI OS	33.07	1	10	10	36	1.22264	4.97781	0.940713	7.31198	0.871704	19.1583	254	29.4865	5.2749
P42199	tcyA	L-cystine-binding protein TcyA OS	38.43	1	12	12	31	1.01097	5.50541	1.07826	5.67352	0.871502	7.6737	268	29.496	8.5874
P39596	efeM	Probable iron uptake system component EfeM OS	40.52	1	12	12	18	0.792396	12.6522	0.772432	19.1279	0.871483	22.9724	385	42.7697	4.99561
C0SPB4	yhaQ	Uncharacterized ABC transporter ATP-binding protein YhaQ OS	7.05	1	2	2	2	0.754278		0.838825		0.871018		298	33.8368	6.55127
O31675	queC	7-cyano-7-deazaguanine synthase OS	14.16	1	2	2	2	1.01369	7.01344	0.860077	1.78917	0.870368	36.3475	219	24.5132	5.43994
P42182	era	GTPase Era OS	34.55	1	8	8	23	0.760932	10.0669	0.965375	9.74751	0.870237	11.1219	301	34.0531	8.19189
P54480	yqfW	Putative nucleotidase YqfW OS	4.66	1	1	1	1	0.754067		0.797461		0.869593		193	22.7335	5.96045
P13243	fbaA	Probable fructose-bisphosphate aldolase OS	63.86	1	18	18	130	1.04003	7.99397	0.99901	13.1551	0.868701	14.5122	285	30.3814	5.2876
P26899	ansB	Aspartate ammonia-lyase OS	50.95	1	20	20	95	1.05109	6.32454	1.07836	8.59351	0.86807	19.9802	475	52.4708	5.92236
P21883	pdhC	Dihydrolipoyllysine-residue acetyltransferase component of pyruvate dehydrogenase complex OS	50	1	20	20	173	0.928687	12.092	0.94077	9.47138	0.866359	10.3974	442	47.5096	5.16064
P39614	ywdF	Uncharacterized glycosyltransferase YwdF OS	13.81	1	3	3	3	1.23854	22.4837	1.06839	31.9615	0.864785	49.3817	268	30.5972	5.35107
O34309	pps	Putative phosphoenolpyruvate synthase OS	4.04	1	3	3	3	1.24888	27.4571	0.896721	18.7709	0.864413	13.8821	866	97.1312	5.64307
P37487	ppaC	Manganese-dependent inorganic pyrophosphatase OS	37.86	1	12	12	44	1.02431	10.2234	1.10491	12.679	0.862975	12.962	309	33.9677	4.79248
P54524	yqiG	Probable NADH-dependent flavin oxidoreductase YqiG OS	32.26	1	11	11	25	1.59486	11.0575	1.12654	17.6181	0.861836	18.0101	372	40.7799	5.50342
O34445	ylbN	Uncharacterized protein YlbN OS	14.53	1	2	2	6	1.14822	4.32358	0.980083	15.094	0.861682	13.5458	172	19.981	4.64014
O34436	pit	Probable low-affinity inorganic phosphate transporter OS	2.4	1	1	1	1	0.745082		0.769551		0.861667		333	35.2083	9.78857
O32232	est	Carboxylesterase OS	27.64	1	5	5	8	1.09611	9.57895	0.947477	7.0912	0.858918	3.08789	246	28.1749	5.2876
P94443	padR	Negative transcription regulator PadR OS	23.08	1	3	3	7	0.682056	15.7413	1.07535	13.0344	0.857993	17.5231	182	21.2089	7.47412
P20429	rpoA	DNA-directed RNA polymerase subunit alpha OS	52.55	1	21	21	87	0.96043	3.25452	0.937786	10.3506	0.857932	14.9345	314	34.7781	4.88135
P20282	rpsM	30S ribosomal protein S13 OS	48.76	1	10	10	41	0.998759	7.32783	0.826464	7.91436	0.857137	7.76321	121	13.7788	11.0776
P21880	pdhD	Dihydrolipoyl dehydrogenase OS	45.11	1	19	19	103	0.916877	15.4892	1.00299	12.1706	0.856328	41.7739	470	49.7017	5.03369
P80698	tig	Trigger factor OS	74.53	1	28	28	149	0.821634	5.02584	0.842045	6.41218	0.855648	7.64355	424	47.4581	4.48779
O05236	yugG	Uncharacterized HTH-type transcriptional regulator YugG OS	45.78	1	6	6	10	0.987587	3.78681	0.976914	7.32414	0.853907	19.8327	166	18.7487	5.21143
O06974	mgfK	UPF0052 protein YvcK OS	4.42	1	1	1	1	0.763937		0.916701		0.85371		317	34.6653	5.80811
P21466	rpsD	30S ribosomal protein S4 OS	79	1	16	16	103	0.989665	9.63125	0.851492	11.5396	0.853424	15.4981	200	22.8212	9.87646
P31104	aroF	Chorismate synthase OS	18.21	1	8	8	14	1.41921	11.6737	0.999554	14.4406	0.853379	23.2727	390	42.779	6.48096
P37869	eno	Enolase OS	63.72	1	22	22	189	0.972632	8.60778	0.935702	11.2089	0.852215	14.3152	430	46.5525	4.76709
Q06796	rplK	50S ribosomal protein L11 OS	49.65	1	9	9	78	0.850075	13.1069	0.878145	6.90687	0.851624	9.18507	141	14.9219	9.26123
P21472	rpsL	30S ribosomal protein S12 OS	13.77	1	2	2	11	1.08369	10.52	0.720601	9.98701	0.851182	13.0336	138	15.2063	10.9604
P45945	yqcK	Uncharacterized protein YqcK OS	13.01	1	1	1	1	0.965893		0.780459		0.850998		146	16.6791	5.35107
Q7BVT7	yerC	Uncharacterized protein YerC OS	38.46	1	3	3	10	0.890872	10.758	0.878352	11.7586	0.850383	20.9275	104	12.024	5.12256
O34994	ccpN	Transcriptional repressor CcpN OS	16.98	1	3	3	3	1.07563	18.5235	0.95191	0.477355	0.850268	17.6041	212	23.8548	7.50342
P39131	mnaA	UDP-N-acetylglucosamine 2-epimerase OS	52.89	1	13	13	17	0.887951	13.937	0.9455	14.5803	0.848312	19.7514	380	42.6079	5.87158
P10725	alr1	Alanine racemase 1 OS	22.88	1	7	7	13	1.00133	6.87157	1.18565	13.8061	0.846459	12.3768	389	43.2374	8.42627
P19946	rplO	50S ribosomal protein L15 OS	41.78	1	7	7	109	0.796592	12.6412	1.04885	13.0283	0.845979	22.9113	146	15.3733	10.2866
O32047	secDF	Protein translocase subunit SecDF OS	31.75	1	17	17	35	0.84666	10.5267	0.791054	15.8489	0.84558	19.1644	737	81.6029	9.15869
O34614	ytqB	Putative rRNA methylase YtqB OS	10.82	1	1	1	1	1.61897		1.10315		0.845566		194	21.2699	5.98584
P39578	dltD	Protein DltD OS	32.4	1	9	9	12	0.947909	9.74728	0.878819	27.7329	0.845228	21.3411	392	44.78	9.51025
O06490	yetN	Uncharacterized protein YetN OS	15.17	1	3	3	5	1.12256	12.505	0.75853	4.61366	0.844747	1.71071	356	41.4226	4.99561
P32396	hemH	Ferrochelatase OS	39.03	1	9	9	29	1.22596	8.6481	0.929215	7.88013	0.844613	20.1976	310	35.3256	4.90674
O05250	malK	Sensor histidine kinase MalK OS	2.06	1	1	1	2	0.8066	4.59111	0.784767	5.60427	0.842575	12.2824	533	58.8931	7.32764
O32106	pepA	Probable cytosol aminopeptidase OS	4.2	1	2	2	5	1.05122	19.8014	1.27683	19.581	0.842231	5.46652	500	53.6237	4.83057
P39119	citA	Citrate synthase 1 OS	7.65	1	2	2	2	1.06617	12.0912	1.12742	30.9703	0.841954	23.7717	366	40.9258	6.21436
P05648	dnaA	Chromosomal replication initiator protein DnaA OS	32.06	1	11	11	16	0.918048	10.231	1.01161	19.7495	0.840999	17.9411	446	50.8276	6.49365
P39814	topA	DNA topoisomerase 1 OS	10.27	1	6	6	9	1.51719	9.85008	0.957675	19.1355	0.838859	14.3359	691	79.0279	8.82178
P00497	purF	Amidophosphoribosyltransferase OS	2.1	1	1	1	1	0.613943		1.05395		0.836919		476	51.6592	6.21436
P05654	pyrB	Aspartate carbamoyltransferase OS	10.2	1	2	2	2	0.964581	20.9458	0.87937	4.8924	0.836772	19.0316	304	34.2023	5.8208
O05392	ruvA	Holliday junction ATP-dependent DNA helicase RuvA OS	22.39	1	3	3	5	0.830077	21.3961	0.953811	0.393194	0.836067	11.3865	201	22.5701	5.66846
P96612	ddl	D-alanine--D-alanine ligase OS	28.53	1	8	8	18	1.20759	8.98003	1.01522	8.9063	0.835868	16.1211	354	39.1057	4.85596
P54179	ypmS	Uncharacterized protein YpmS OS	8.56	1	1	1	1	0.554637		0.856605		0.835326		187	21.0749	5.60498
P21884	ykyA	Uncharacterized lipoprotein YkyA OS	4.48	1	1	1	1	0.909907		0.639196		0.835214		223	25.853	6.7124
P42954	tagH	Teichoic acids export ATP-binding protein TagH OS	7.78	1	4	4	7	1.0797	17.6015	0.98869	8.50287	0.835138	17.9245	527	59.2064	9.08545
P21468	rpsF	30S ribosomal protein S6 OS	67.37	1	8	8	79	0.900229	8.14979	0.918163	11.7418	0.834017	8.60841	95	11.1177	5.2876
O31742	rplS	50S ribosomal protein L19 OS	56.52	1	9	9	46	0.977152	12.6734	0.84561	17.1196	0.83351	28.4158	115	13.3786	10.814
O34599	iscS1	Putative cysteine desulfurase IscS 1 OS	22.96	1	6	6	18	1.04294	19.9552	0.839912	22.1713	0.833337	26.0513	379	41.1661	5.85889
O34966	znuA	Probable zinc transport system zinc-binding lipoprotein AdcA OS	17.24	1	5	5	5	0.901789	11.1354	0.81535	10.6539	0.833192	18.7351	319	35.6379	5.47803
P05652	gyrB	DNA gyrase subunit B OS	29.31	2	13	13	28	1.19441	11.1412	0.905443	27.3451	0.832346	16.2218	638	71.4593	5.73193
P71084	gsaB	Glutamate-1-semialdehyde 2,1-aminomutase 2 OS	25.64	1	7	7	18	0.831946	10.1965	1.10896	7.9619	0.831707	12.1509	429	46.1547	6.06201
P35160	resA	Thiol-disulfide oxidoreductase ResA OS	13.97	1	1	1	1	0.71693		1.14531		0.830067		179	19.9953	8.22119
P37528	pdxT	Glutamine amidotransferase subunit PdxT OS	34.18	1	4	4	8	0.919832	8.93275	1.00776	19.3068	0.829188	4.18282	196	21.4331	5.24951
O32218	bdbD	Disulfide bond formation protein D OS	53.15	1	9	9	18	0.911956	10.8833	0.844718	21.4951	0.829164	22.2335	222	24.8899	5.41455
P37477	lysS	Lysine--tRNA ligase OS	41.68	1	18	18	64	1.12866	6.10422	0.812484	9.02067	0.828259	10.8732	499	57.5032	5.33838
P13800	degU	Transcriptional regulatory protein DegU OS	59.39	1	10	10	32	1.01817	8.79482	0.893662	6.64233	0.826644	20.4502	229	25.8504	6.03662
P17903	rsbV	Anti-sigma-B factor antagonist OS	39.45	1	6	6	12	0.81872	10.1251	0.85343	4.17501	0.826119	9.22736	109	11.9313	5.04639
P39822	psd	Phosphatidylserine decarboxylase proenzyme OS	7.6	1	2	2	2	1.05385	26.5396	0.795639	8.15831	0.824949	14.0851	263	29.6712	7.54736
O34751	yloV	Uncharacterized protein YloV OS	24.95	1	10	10	22	0.918498	8.79819	0.839164	7.02254	0.824391	22.8587	553	59.4598	4.57666
O34483	hprK	HPr kinase/phosphorylase OS	9.03	1	2	2	2	1.05735	0.134709	0.965203	12.1636	0.824128	49.9182	310	34.6802	5.16064
P28264	ftsA	Cell division protein FtsA OS	17.5	1	6	6	9	0.937434	18.0205	0.944628	10.0227	0.823299	12.1615	440	48.1618	5.24951
P94447	yrbC	Probable transcriptional regulatory protein YrbC OS	10.83	1	1	2	7	0.905426		0.702009		0.822916		240	26.6912	4.70361
P28820	pabB	Para-aminobenzoate synthase component 1 OS	10.85	1	5	5	7	1.10144	10.6786	0.905368	6.70756	0.822658	22.9595	470	53.2179	5.5542
P25813	rsmG	Ribosomal RNA small subunit methyltransferase G OS	25.52	1	6	6	7	1.02983	7.46775	0.883927	16.4826	0.821706	9.36226	239	26.9371	7.02002
O06474	yfmP	HTH-type transcriptional regulator YfmP OS	21.43	1	2	2	2	0.943903	4.13008	0.944763	7.4243	0.820268	6.677	140	16.4926	5.47803
P54381	glyS	Glycine--tRNA ligase beta subunit OS	38.44	1	21	21	62	0.986811	10.2876	0.929032	12.6414	0.820173	12.2246	679	76.2433	5.32568
O31778	miaB	(Dimethylallyl)adenosine tRNA methylthiotransferase MiaB OS	17.29	1	8	8	8	1.21389	9.32383	0.871526	16.5504	0.819971	12.3527	509	58.1328	7.23975
O31656	ykrK	Uncharacterized protein YkrK OS	18.45	1	3	3	4	1.15258	28.3069	0.689174	44.4777	0.819704	8.11058	233	26.8481	6.62451
O34863	uvrA	UvrABC system protein A OS	4.81	1	4	4	6	1.48414	14.8677	0.961306	8.55384	0.818645	13.482	957	105.966	6.27783
P54510	yqhL	Uncharacterized protein YqhL OS	30.16	1	4	4	9	1.0121	6.07723	0.962704	17.3992	0.816663	13.7303	126	14.5558	9.99365
P25499	hrcA	Heat-inducible transcription repressor HrcA OS	4.08	1	1	1	1	1.11079		1.25392		0.815692		343	39.0035	6.55127
O32236	rghR	HTH-type transcriptional repressor RghR OS	22.96	1	2	2	3	1.00793		0.944783	4.32984	0.815159	48.0855	135	15.436	6.58057
P94569	ysoA	TPR repeat-containing protein YsoA OS	14.67	1	3	3	4	0.894625	31.7077	1.0408	39.021	0.814775	18.2444	334	38.6814	4.81787
O32036	yrrM	Putative O-methyltransferase YrrM OS	11.06	1	2	2	3	0.936235	12.5934	0.936845	9.53349	0.814728	12.081	217	25.047	5.98584
P55180	galE	UDP-glucose 4-epimerase OS	20.06	1	6	6	15	1.07387	6.44407	0.874543	7.66471	0.81431	9.35974	339	36.9855	5.05908
Q45601	rlmH	Ribosomal RNA large subunit methyltransferase H OS	9.43	1	1	1	2	1.21023	0.214062	0.917427	0.529782	0.813013	1.721	159	18.0617	8.93896
P39812	gltA	Glutamate synthase [NADPH] large chain OS	17.63	1	22	22	33	1.44338	13.4627	1.00846	14.2426	0.811459	18.8853	1520	168.667	5.80811
P37814	atpF	ATP synthase subunit b OS	54.12	1	13	13	47	0.846884	7.95439	0.865496	6.41364	0.811141	10.8305	170	19.1964	5.10986
P21474	rpsP	30S ribosomal protein S16 OS	70	1	6	6	68	0.93605	13.0057	1.0428	9.74156	0.810765	21.4627	90	10.1284	10.1841
O31743	rbgA	Ribosome biogenesis GTPase A OS	29.08	1	8	8	13	1.01333	7.19594	0.963955	25.0294	0.810675	6.88972	282	31.9662	9.11475
O34828	yrzB	UPF0473 protein YrzB OS	11.83	1	1	1	3	0.91244	11.5575	0.796577	8.36463	0.810545	16.9129	93	10.8158	3.63721
P37809	atpD	ATP synthase subunit beta OS	62.79	1	25	25	208	0.874662	6.46166	0.969958	10.4787	0.810091	16.3029	473	51.3883	4.90674
P26908	rplU	50S ribosomal protein L21 OS	55.88	1	5	5	61	0.978289	12.8857	0.817115	9.48327	0.809652	15.1371	102	11.2681	9.72998
O31848	yozC	Uncharacterized protein YozC OS	16.42	1	1	1	2	0.837422	0.284716	0.917495	0.710807	0.808999	1.65446	67	8.06112	8.08936
O07006	padC	Phenolic acid decarboxylase PadC OS	7.45	1	1	1	1	1.69815		1.13225		0.80866		161	19.0642	5.14795
P49850	mutL	DNA mismatch repair protein MutL OS	3.83	1	2	2	2	0.970811	16.2946	0.80167	5.81875	0.805418	28.8938	627	70.3873	5.98584
O31513	yesJ	Uncharacterized N-acetyltransferase YesJ OS	17.78	1	2	2	2	1.08557	33.142	1.17216	14.3115	0.804501	33.1802	180	20.33	5.17334
P12879	rpsH	30S ribosomal protein S8 OS	46.97	1	9	9	32	0.88985	6.13453	0.873504	11.368	0.803328	12.7425	132	14.8681	9.86182
Q07876	rsmH	Ribosomal RNA small subunit methyltransferase H OS	27.65	1	7	7	16	1.02836	11.1467	0.9003	10.8308	0.803213	14.9926	311	35.2835	6.46826
P94478	hflX	GTPase HflX OS	7.14	1	2	2	2	1.03012	10.101	0.845763	9.55112	0.802778	16.1953	420	47.6087	5.59229
C0SP95	ycnJ	Copper transport protein YcnJ OS	14.23	1	5	5	8	0.755812	19.2961	0.921702	12.8001	0.801965	33.6475	541	59.757	9.68604
P39820	proB	Glutamate 5-kinase 1 OS	18.36	1	5	5	6	0.8323	12.0615	0.889329	16.5003	0.801961	27.5159	365	39.3212	6.26514
P94463	fmt	Methionyl-tRNA formyltransferase OS	47.95	1	12	12	23	1.05282	5.02179	0.978887	8.0085	0.801882	29.2869	317	34.6125	5.97314
O31849	yojO	Uncharacterized protein YojO OS	4.23	1	2	2	2	1.18249	12.3222	0.953448	1.96519	0.799843	8.89931	638	73.7411	5.47803
P17921	pheS	Phenylalanine--tRNA ligase alpha subunit OS	32.56	1	9	9	36	0.893128	16.6606	0.92838	11.6019	0.799553	23.2086	344	38.6504	5.36377
O34805	yvrC	Uncharacterized ABC transporter substrate-binding lipoprotein YvrC OS	21.34	1	5	5	9	0.841546	12.9373	0.892512	11.7414	0.798782	22.7004	314	34.2176	5.26221
O32231	rnr	Ribonuclease R OS	12.32	1	7	7	10	1.39148	7.31888	0.811071	19.0037	0.798405	40.1837	779	88.6946	6.11279
P54383	ispA	Farnesyl diphosphate synthase OS	8.11	1	2	2	2	0.977679	13.3571	0.848544	4.50858	0.797113	29.3572	296	32.4828	5.47803
Q06754	yacL	Uncharacterized PIN and TRAM-domain containing protein YacL OS	4.37	1	1	1	1	0.964283		0.79882		0.796093		366	40.8323	5.2876
P05653	gyrA	DNA gyrase subunit A OS	28.75	1	18	18	32	1.14941	16.6215	0.781738	9.82215	0.794829	22.1062	821	92.0419	5.50342
O34874	iscS2	Putative cysteine desulfurase IscS 2 OS	3.67	1	1	1	1	1.01835		0.755031		0.793632		381	41.4615	6.81494
P27621	tagB	Putative CDP-glycerol:glycerophosphate glycerophosphotransferase OS	2.36	1	1	1	1	0.97111		0.788357		0.793133		381	44.5262	8.73389
P11998	ribH	6,7-dimethyl-8-ribityllumazine synthase OS	40.91	1	4	4	9	0.67333	26.7271	0.709337	36.9788	0.792341	35.3678	154	16.2764	5.52881
P20964	obg	GTPase ObgE OS	53.74	1	15	15	33	1.09397	14.0184	0.657598	9.84747	0.791676	19.8068	428	47.6591	5.17334
P52996	panB	3-methyl-2-oxobutanoate hydroxymethyltransferase OS	23.1	1	4	4	9	1.4451	12.5461	0.962526	26.9898	0.790669	42.1757	277	29.7394	5.64307
P54548	rnz	Ribonuclease Z OS	10.42	1	2	2	3	0.914294	36.4186	1.02566	25.6716	0.789966	4.26971	307	34.0018	6.25244
P30949	hemL	Glutamate-1-semialdehyde 2,1-aminomutase OS	45.12	1	15	15	31	1.10916	6.88197	0.903163	10.1864	0.78966	22.8297	430	46.4195	5.33838
P54592	yhcH	Uncharacterized ABC transporter ATP-binding protein YhcH OS	6.56	1	2	2	4	0.853246	1.79867	1.00425	3.52897	0.788349	5.42901	305	34.4483	6.81494
P37582	glnR	HTH-type transcriptional regulator GlnR OS	9.63	1	1	1	3	0.950482	10.7145	0.900461	10.299	0.787313	5.63829	135	15.8222	9.30518
P42085	xpt	Xanthine phosphoribosyltransferase OS	12.37	1	2	2	3	0.770743	17.3286	0.92946	1.85471	0.787255	6.79852	194	21.0252	6.29053
O31678	queF	NADPH-dependent 7-cyano-7-deazaguanine reductase OS	40	1	6	6	15	1.15311	10.4341	0.736645	13.4106	0.786716	24.1753	165	19.3623	5.23682
O34600	nrnA	Bifunctional oligoribonuclease and PAP phosphatase NrnA OS	15.65	1	3	3	6	1.07048	22.0873	1.09479	10.7118	0.786127	5.03799	313	35.0626	4.95752
P37541	yaaT	Stage 0 sporulation protein YaaT OS	6.91	1	2	2	3	0.943909	0.732091	0.803172	7.81424	0.78585	3.36031	275	31.199	5.13525
P94593	ywqA	Uncharacterized ATP-dependent helicase YwqA OS	2.82	1	2	2	2	1.57494	36.9152	1.25033	35.4763	0.784156	27.0301	922	105.963	5.31299
O34469	yeeB	Putative ATP-dependent helicase YeeB OS	4.17	1	2	2	3	0.965796		0.834692		0.78339		599	68.0869	5.38916
P54475	cshB	DEAD-box ATP-dependent RNA helicase CshB OS	41.78	1	16	16	34	1.23391	13.9329	0.732013	12.5649	0.7825	20.3316	438	49.9959	9.48096
P37566	yacD	Putative peptidyl-prolyl cis-trans isomerase YacD OS	11.45	1	3	3	4	1.02071	11.9618	0.979576	6.14901	0.781151	10.1974	297	34.0754	5.22412
O34897	ykuT	Uncharacterized MscS family protein YkuT OS	4.49	1	1	1	1	0.904263		0.791603		0.780151		267	29.937	6.30322
P34957	qoxA	Quinol oxidase subunit 2 OS	50.78	1	11	11	45	0.872437	11.1276	0.922222	16.8434	0.780084	11.937	321	36.2586	5.10986
O05516	tsaB	Uncharacterized protein YdiC OS	24.89	1	5	5	10	0.765286	16.0732	0.728625	17.3669	0.779124	36.4568	229	25.2272	6.21436
P05650	yaaA	Uncharacterized protein YaaA OS	67.61	1	3	3	4	0.73071	43.9103	1.03571	15.9422	0.778894	30.7073	71	7.921	4.65283
P25972	pyrE	Orotate phosphoribosyltransferase OS	13.43	1	3	3	3	0.872903	8.3169	0.911249	21.6552	0.776807	21.8604	216	23.5071	6.04932
P94464	rsmB	Ribosomal RNA small subunit methyltransferase B OS	10.29	1	4	4	4	1.01238	5.17201	0.802392	21.5529	0.776095	19.231	447	50.2424	7.34229
C0SPB8	yvaV	Putative HTH-type transcriptional regulator YvaV OS	18.08	1	2	2	3	0.986124	28.9224	0.895025	28.0989	0.775768	33.7424	177	20.9136	5.12256
P37564	coaX	Type III pantothenate kinase OS	13.18	1	3	3	7	1.06974	10.5551	0.979348	12.7004	0.775721	10.2423	258	28.5578	6.30322
O32068	ytzG	Uncharacterized RNA pseudouridine synthase YtzG OS	21.76	1	3	3	3	0.98193	25.8946	0.854119	25.3142	0.774894	58.7118	239	26.7728	5.89697
P46906	argS	Arginine--tRNA ligase OS	43.53	1	21	21	58	1.1554	17.5522	0.918051	22.4311	0.774113	17.9368	556	62.6837	5.41455
P32395	hemE	Uroporphyrinogen decarboxylase OS	35.13	1	8	8	15	1.01459	3.54946	0.80917	16.794	0.771186	15.1921	353	39.6214	5.60498
O31672	mhqR	HTH-type transcriptional regulator MhqR OS	11.03	1	2	2	4	1.03378	4.72353	0.961956	9.47639	0.771122	12.5056	145	16.5567	6.88818
P06574	sigB	RNA polymerase sigma-B factor OS	27.48	1	6	6	8	0.792316	14.7941	0.730185	15.4909	0.769628	18.886	262	29.8825	5.77002
O31503	rlmCD	23S rRNA (uracil-C(5))-methyltransferase RlmCD OS	2.18	1	1	1	1	0.874965		0.937111		0.768834		459	51.7864	6.11279
Q59192	parE	DNA topoisomerase 4 subunit B OS	12.52	1	6	6	11	1.23452	12.2718	0.900816	9.18697	0.768444	17.9364	655	72.9618	6.62451
P22250	gltX	Glutamate--tRNA ligase OS	41.82	1	17	17	54	1.42474	12.7996	0.940418	10.4832	0.767649	15.1012	483	55.6875	5.2749
P94403	bsdA	HTH-type transcriptional regulator BsdA OS	4.14	1	1	1	1	0.63659		0.838038		0.76673		290	32.9662	6.44287
P94545	mutSB	MutS2 protein OS	12.1	1	7	7	9	1.18798	18.1009	0.903341	18.6724	0.766583	15.8471	785	87.3627	6.21436
O32044	recJ	Single-stranded-DNA-specific exonuclease RecJ OS	5.85	1	3	3	5	0.936975	23.0608	0.918239	12.1988	0.76553	17.7033	786	87.9674	5.51611
P23966	menB	1,4-Dihydroxy-2-naphthoyl-CoA synthase OS	54.98	1	10	10	58	1.02474	9.91632	0.965132	13.4608	0.765163	8.79565	271	29.8801	5.71924
P08838	ptsI	Phosphoenolpyruvate-protein phosphotransferase OS	57.89	2	31	31	131	0.990257	9.18257	0.928265	10.9211	0.764877	22.0689	570	63.0393	4.85596
O32158	yurQ	Uncharacterized protein YurQ OS	42.74	1	5	5	13	0.66048	10.9164	0.738384	5.21899	0.76451	5.96359	124	14.8007	8.1626
P42060	rplV	50S ribosomal protein L22 OS	66.37	1	8	8	59	0.932907	13.9295	0.877749	14.3718	0.764316	27.6119	113	12.4518	10.7261
O34303	ydjA	Type-2 restriction enzyme BsuMI component YdjA OS	2.8	1	1	1	1	1.00946		0.653795		0.763026		465	54.3019	8.25049
P17731	hisC	Histidinol-phosphate aminotransferase OS	9.72	1	3	3	4	1.02462	4.54971	0.872815	18.7569	0.761505	16.1014	360	40.0115	5.21143
P54396	ypmB	Uncharacterized protein YpmB OS	21.74	1	2	2	2	1.38794	42.9359	0.961303	3.93796	0.761365	2.85185	161	17.8847	8.86572
P12013	gntZ	6-phosphogluconate dehydrogenase, NAD(+)-dependent, decarboxylating OS	32.05	1	9	10	30	1.0143	18.2997	0.866417	26.6021	0.760257	68.2098	468	51.9501	5.05908
P21656	trpS	Tryptophan--tRNA ligase OS	42.42	1	10	10	16	1.05309	12.5235	0.915316	8.69225	0.758861	14.2551	330	37.1733	6.94678
P06629	ywjG	Uncharacterized protein YwjG OS	15.03	1	2	2	3	1.08429	11.2189	1.16977	17.7562	0.757224	12.2038	173	19.0534	4.58936
O31774	rny	Ribonuclease Y OS	33.08	1	15	15	27	1.25765	8.01925	0.915729	12.1172	0.756784	12.9291	520	58.883	5.71924
P11044	thyA2	Thymidylate synthase 2 OS	17.42	1	4	4	6	1.04961	9.89069	0.854403	5.39944	0.755271	21.3483	264	30.5184	6.7417
P40871	dhbE	2,3-dihydroxybenzoate-AMP ligase OS	22.26	1	7	7	11	1.05775	18.8679	0.916298	13.2118	0.754678	35.6091	539	59.8907	6.1001
O34595	thiI	Probable tRNA sulfurtransferase OS	24.44	1	8	8	12	1.01025	10.8349	0.934067	11.9443	0.754419	13.0289	401	45.4365	8.07471
C0SP93	accD	Acetyl-coenzyme A carboxylase carboxyl transferase subunit beta OS	48.62	1	13	13	40	0.932513	15.6904	0.884697	19.3092	0.753853	17.5123	290	32.0141	6.25244
P37464	serS	Serine--tRNA ligase OS	49.65	1	15	15	27	1.39846	7.84655	0.878623	12.327	0.753301	21.7342	425	48.8109	5.47803
P45745	dhbF	Dimodular nonribosomal peptide synthase OS	5.34	1	9	9	9	1.45641	17.51	1.01977	13.1547	0.751383	52.9208	2378	263.604	5.04639
P21471	rpsJ	30S ribosomal protein S10 OS	65.69	1	9	9	73	0.930201	8.14105	0.90645	11.258	0.750686	16.055	102	11.6584	9.78857
P21470	rpsI	30S ribosomal protein S9 OS	52.31	1	4	4	40	0.866184	17.3504	0.678505	24.1682	0.750685	26.3238	130	14.2998	10.5942
P21469	rpsG	30S ribosomal protein S7 OS	57.69	1	11	11	117	0.895599	9.55171	0.946505	6.75512	0.7498	9.09749	156	17.8715	10.0229
P21467	rpsE	30S ribosomal protein S5 OS	67.47	1	11	11	190	0.849845	12.3371	0.873845	11.8454	0.74857	24.0412	166	17.6118	9.92041
P32398	yhgD	Uncharacterized HTH-type transcriptional regulator YhgD OS	4.19	1	1	1	1	1.04549		0.898069		0.747745		191	21.7796	7.47412
O34894	ezrA	Septation ring formation regulator EzrA OS	18.86	1	9	9	12	1.04482	19.0112	0.968015	22.4483	0.747682	18.5896	562	64.9556	4.99561
O34441	yloC	UPF0701 protein YloC OS	7.22	1	2	2	3	1.0211	26.8375	0.914148	20.7098	0.746286	9.88382	291	33.6094	5.16064
P42175	narG	Nitrate reductase alpha chain OS	6.35	1	6	6	7	1.43221	16.9544	0.877595	19.6498	0.745452	26.2784	1228	139.011	6.48096
C0H3R3	yvzF	Uncharacterized protein YvzF OS	42.62	1	2	2	5	0.885901	7.35491	0.874191	6.42375	0.744253	27.3293	61	7.29882	9.40771
O32028	mtnN	5'-methylthioadenosine/S-adenosylhomocysteine nucleosidase OS	54.98	1	8	8	18	1.01123	14.2198	0.77241	16.2696	0.742595	19.7557	231	25.2489	5.14795
O31498	ligA	DNA ligase OS	19.91	1	12	12	14	1.0518	8.29228	0.814262	11.6232	0.742569	16.8777	668	74.8297	4.97021
P94538	ysgA	Uncharacterized tRNA/rRNA methyltransferase YsgA OS	29.44	1	5	5	10	0.990384	16.5993	0.841186	18.2838	0.74208	32.7307	248	26.879	5.49072
O34705	ytpA	Phospholipase YtpA OS	7.34	1	1	1	1	0.782244		1.07364		0.742026		259	29.5473	7.1958
P17820	dnaK	Chaperone protein DnaK OS	65.63	1	37	37	164	0.702297	18.2926	0.974717	9.3286	0.740192	23.0903	611	65.962	4.86865
O06491	gatA	Glutamyl-tRNA(Gln) amidotransferase subunit A OS	50.93	1	22	22	69	1.09798	10.8195	1.02854	21.3082	0.739215	10.825	485	52.631	5.59229
P46920	opuAA	Glycine betaine transport ATP-binding protein OpuAA OS	22.97	1	7	7	12	0.778659	37.4975	0.892648	10.2171	0.739011	9.15374	418	46.4393	5.42725
P17922	pheT	Phenylalanine--tRNA ligase beta subunit OS	42.79	1	24	24	48	0.977283	5.46376	0.924447	11.1547	0.738711	20.8846	804	87.891	5.13525
P94504	yvrH	Transcriptional regulatory protein YvrH OS	17.72	1	2	2	3	1.05231	26.5569	1.07431	20.4601	0.738308	15.402	237	26.6625	5.36377
P21464	rpsB	30S ribosomal protein S2 OS	63.01	1	21	21	101	0.941694	7.06437	0.87286	9.45812	0.737653	12.654	246	27.9498	6.63916
P39815	trmFO	Methylenetetrahydrofolate--tRNA-(uracil-5-)-methyltransferase TrmFO OS	45.29	1	13	13	33	1.0994	12.0699	0.998969	14.8339	0.737593	23.54	435	48.0326	6.16357
P23630	lysA	Diaminopimelate decarboxylase OS	9.57	1	3	3	8	1.01312	28.4402	0.986364	49.4919	0.737051	54.1896	439	48.5435	5.31299
O31716	ykpA	Uncharacterized ABC transporter ATP-binding protein YkpA OS	39.07	1	17	17	43	1.04358	4.4193	0.848235	7.11969	0.736739	11.9855	540	61.0171	5.2749
O54408	relA	GTP pyrophosphokinase OS	11.44	1	7	7	8	1.40357	30.517	1.05066	28.6109	0.736636	11.589	734	84.7711	7.37158
P80885	pyk	Pyruvate kinase OS	56.07	1	25	25	158	0.941682	9.28098	0.924155	15.2503	0.734651	13.2874	585	62.1353	5.18604
P17889	infB	Translation initiation factor IF-2 OS	35.06	1	22	22	70	1.03883	8.86656	0.697693	20.1214	0.734175	16.2192	716	78.5732	5.52881
P32393	comEB	ComE operon protein 2 OS	12.7	1	3	3	4	0.994093	10.7996	1.08371	14.7687	0.73274	17.8108	189	20.9553	5.74463
O07585	yhdP	UPF0053 protein YhdP OS	4.28	1	3	3	4	0.863414	8.5659	0.873841	7.87844	0.731117	16.8573	444	49.8241	4.66553
P25994	pyrAB	Carbamoyl-phosphate synthase pyrimidine-specific large chain OS	16.71	1	12	12	15	1.11177	23.4526	0.833535	14.6086	0.730582	27.4247	1071	117.576	5.05908
P05649	dnaN	DNA polymerase III subunit beta OS	29.37	1	12	12	26	0.976038	6.08484	0.972005	20.4934	0.730155	29.9563	378	42.0774	5.0083
P39789	ypoC	Uncharacterized protein YpoC OS	20.12	1	3	3	4	0.955708	7.39601	0.833416	10.5166	0.729117	21.2053	164	19.3337	6.90283
P96652	lrpA	HTH-type transcriptional regulator LrpA OS	8.09	1	1	1	2	0.802272	18.0034	0.83426	6.68369	0.728302	2.08329	136	15.4281	7.89893
O31613	yjbO	Uncharacterized RNA pseudouridine synthase YjbO OS	7.42	1	2	2	2	1.01854	5.95307	0.855271	1.23178	0.726881	25.9483	283	31.4542	7.03467
P39063	ytxD	Uncharacterized protein YtxD OS	4.41	1	1	1	1	1.03109		0.763459		0.72682		272	30.1241	8.82178
P05657	rpmA	50S ribosomal protein L27 OS	44.68	1	5	5	98	0.782953	8.22653	1.10308	12.6176	0.726153	17.1957	94	10.3655	10.3159
P32727	nusA	Transcription termination/antitermination protein NusA OS	53.91	1	15	15	42	1.07397	12.0748	0.746009	31.9222	0.726036	34.6115	371	41.6997	4.85596
P54471	trmK	tRNA (adenine(22)-N(1))-methyltransferase OS	23.95	1	3	3	5	0.911345	14.7274	0.915841	9.57639	0.723437	15.4751	238	26.1456	5.80811
O31714	fruK	1-phosphofructokinase OS	3.96	1	1	1	1	0.784312		0.958995		0.722831		303	32.7708	5.14795
P42923	rplJ	50S ribosomal protein L10 OS	65.66	1	14	14	82	0.883276	10.4512	0.873761	14.3205	0.72209	13.1193	166	18.0677	5.43994
P12043	purM	Phosphoribosylformylglycinamidine cyclo-ligase OS	8.38	1	2	2	6	0.757194	16.6972	0.810353	13.6457	0.720287	36.1702	346	37.0288	4.80518
O34588	ykuJ	Uncharacterized protein YkuJ OS	48.1	1	3	3	9	0.826093	14.3567	1.08309	12.4987	0.719804	13.3367	79	9.23855	4.56396
P37519	yyaE	Probable oxidoreductase YyaE OS	4.95	1	3	3	3	1.24046	17.3778	0.979857	4.14689	0.71828	29.1846	667	73.8888	5.49072
P39149	upp	Uracil phosphoribosyltransferase OS	69.86	1	13	13	45	0.986786	9.18095	0.779656	10.7069	0.718229	20.0261	209	23.0222	6.30322
P19582	hom	Homoserine dehydrogenase OS	2.77	1	1	1	1	0.607288		0.798523		0.718072		433	47.4645	5.21143
Q04797	asd	Aspartate-semialdehyde dehydrogenase OS	47.69	1	10	10	45	1.03817	11.6703	0.824704	12.7533	0.717829	22.9573	346	37.8233	5.2749
P37949	lepA	Elongation factor 4 OS	36.11	1	18	18	27	1.03461	8.57333	0.824676	12.8532	0.717769	23.1082	612	68.5434	5.2749
P37808	atpA	ATP synthase subunit alpha OS	53.39	1	26	26	194	0.849101	6.63779	0.859119	10.8229	0.717717	17.2913	502	54.5645	5.36377
P17894	recN	DNA repair protein RecN OS	8.68	1	4	4	5	1.22461	9.47552	0.946858	12.9887	0.716966	10.9032	576	64.4684	5.12256
O34990	purU	Formyltetrahydrofolate deformylase OS	16.67	1	3	3	4	0.983611	7.98404	0.84414	15.9692	0.716384	39.2554	300	34.4557	6.02393
P37518	ychF	Ribosome-binding ATPase YchF OS	34.15	1	11	11	24	1.05521	18.4448	0.844137	18.9125	0.715596	37.286	366	40.0437	4.91943
P28618	pcp	Pyrrolidone-carboxylate peptidase OS	7.44	1	1	1	1	0.873741		0.838952		0.715327		215	23.7592	6.88818
P54457	rsfS	Ribosomal silencing factor RsfS OS	27.12	1	3	3	6	0.945048	10.7672	0.863929	11.6614	0.714688	5.68606	118	13.2906	4.75439
O34824	glmM	Phosphoglucosamine mutase OS	28.79	1	11	11	36	0.988301	23.1706	0.999502	26.0777	0.714562	33.3297	448	48.4025	4.99561
P42400	yckB	Probable ABC transporter extracellular-binding protein YckB OS	18.12	1	6	6	10	0.916031	13.8094	0.792461	15.5976	0.714349	30.5751	287	31.7002	8.30908
Q06755	ispD	2-C-methyl-D-erythritol 4-phosphate cytidylyltransferase OS	9.91	1	2	2	2	0.725661	19.4043	0.75323	27.5438	0.714122	3.2293	232	25.8274	5.98584
O34958	ylbE	Uncharacterized protein YlbE OS	22.78	1	1	1	2	1.1376	3.5026	0.901972	0.62341	0.713228	38.7894	79	9.86087	9.77393
P96503	fliW	Flagellar assembly factor FliW OS	17.48	1	2	2	4	0.969187	2.03713	0.798035	14.0829	0.712874	14.6489	143	16.1592	4.61475
O34580	pcrA	ATP-dependent DNA helicase PcrA OS	18.94	1	10	10	11	1.15613	12.4845	0.829897	13.1432	0.711005	23.9314	739	83.5032	6.15088
P40750	pbpD	Penicillin-binding protein 4 OS	24.68	1	11	11	13	0.853306	14.7765	0.807422	15.2283	0.709892	18.9652	624	70.614	9.08545
P51833	rnc	Ribonuclease 3 OS	16.47	1	4	4	9	1.23866	9.39258	0.959837	10.5022	0.709844	11.8031	249	28.4077	8.08936
P52998	panC	Pantothenate synthetase OS	30.07	2	6	6	8	1.20058	17.0298	0.859484	11.9619	0.708875	24.4539	286	31.9384	4.93213
O34522	trmB	tRNA (guanine-N(7)-)-methyltransferase OS	49.3	1	9	9	16	0.936244	6.00656	0.894819	13.1547	0.70794	22.833	213	24.4884	6.81494
P20277	rplQ	50S ribosomal protein L17 OS	50	1	6	6	37	0.898841	9.3145	0.900006	8.40583	0.707922	15.1608	120	13.7422	9.90576
O32159	yurR	Uncharacterized oxidoreductase YurR OS	11.83	1	3	3	4	1.117	1.57022	0.919486	3.58566	0.707544	5.04404	372	39.4254	6.7417
C0SP86	sftA	DNA translocase SftA OS	13.97	1	8	8	9	0.8678	19.6096	0.770308	18.2075	0.706835	31.0932	952	106.757	5.12256
P09122	dnaX	DNA polymerase III subunit gamma/tau OS	4.44	1	2	2	2	0.82497		1.05215		0.705633		563	62.7235	5.78271
O31753	dxr	1-deoxy-D-xylulose 5-phosphate reductoisomerase OS	33.68	1	9	9	19	0.917801	11.4986	0.806411	14.3655	0.705442	11.602	383	42.5101	5.49072
Q45480	ylyB	Uncharacterized RNA pseudouridine synthase YlyB OS	20.79	1	5	5	9	0.918887	16.6587	0.902157	6.46708	0.705435	26.4264	303	33.705	5.98584
O34643	yvkB	Uncharacterized HTH-type transcriptional regulator YvkB OS	7.94	1	1	1	1	1.07019		0.690804		0.704599		189	21.5202	7.25439
P39456	tcyC	L-cystine import ATP-binding protein TcyC OS	16.19	1	2	2	2	0.8125		0.830487		0.704262		247	27.7309	7.43018
O05240	yugK	Probable NADH-dependent butanol dehydrogenase 2 OS	21.28	1	6	7	25	0.977731	7.02679	0.892002	10.904	0.70243	6.44812	390	43.3787	4.94482
O34939	ydiO	Probable BsuMI modification methylase subunit YdiO OS	13.35	1	4	4	6	1.06295	6.52114	1.06168	14.921	0.702355	9.96545	427	48.879	7.84033
P19672	yqxC	Putative rRNA methyltransferase YqxC OS	7.12	1	2	2	3	0.898565	4.19753	0.767854	15.0173	0.702248	11.4452	281	31.2544	8.19189
P32732	truB	tRNA pseudouridine synthase B OS	11	1	3	3	3	1.01554	7.0754	0.825977	17.3103	0.7005	14.2208	309	34.1827	7.09326
P94479	ynbB	Uncharacterized protein YnbB OS	8.55	1	3	3	4	1.00915	10.7044	0.852144	7.85677	0.699589	19.2367	421	46.1434	5.60498
O05519	ydiF	Uncharacterized ABC transporter ATP-binding protein YdiF OS	8.72	1	5	5	5	1.23771	7.28771	1.08062	16.7539	0.698399	17.6068	642	73.4364	5.16064
P42957	mtlD	Mannitol-1-phosphate 5-dehydrogenase OS	31.1	1	8	8	16	0.913601	10.3567	0.858874	14.3673	0.697225	11.4541	373	41.0925	6.03662
P36430	leuS	Leucine--tRNA ligase OS	44.15	1	29	29	75	1.05995	5.71562	0.899056	18.6378	0.696356	17.5309	804	91.485	5.13525
O05515	tsaE	UPF0079 ATP-binding protein YdiB OS	18.99	1	3	3	3	0.916164	11.093	0.894841	2.8277	0.696042	9.82404	158	17.895	4.86865
P27206	srfAA	Surfactin synthase subunit 1 OS	2.43	1	4	7	11	0.881507	11.8016	0.72249	18.25	0.695295	21.3105	3587	401.895	5.10986
Q06752	cysS	Cysteine--tRNA ligase OS	36.48	1	14	14	27	1.17199	9.14669	0.883465	11.3732	0.69491	21.1742	466	53.8739	5.40186
P46323	cinA	Putative competence-damage inducible protein OS	16.35	1	4	4	5	1.03528	10.7595	0.949254	10.1167	0.694166	20.7467	416	45.5095	5.64307
P55872	infC	Translation initiation factor IF-3 OS	23.12	1	4	4	13	0.895808	11.9138	0.817335	7.5643	0.692149	17.7392	173	19.7196	9.84717
P24327	prsA	Foldase protein PrsA OS	56.16	1	19	19	65	0.957013	9.07932	1.06556	12.179	0.691194	14.5031	292	32.4899	8.76318
P23478	addA	ATP-dependent helicase/nuclease subunit A OS	3.49	1	3	3	4	1.24216	5.79688	0.883019	7.58244	0.689888	6.34377	1232	140.999	5.43994
O34750	yfmL	Putative ATP-dependent RNA helicase YfmL OS	13.83	1	4	4	4	0.806955	19.5218	0.801147	16.7703	0.688916	3.75411	376	42.1628	9.18799
P30300	glpP	Glycerol uptake operon antiterminator regulatory protein OS	11.46	1	2	2	3	0.936422	16.1743	1.08905	5.90802	0.688532	16.5884	192	21.5953	8.104
P54382	folD	Bifunctional protein FolD OS	34.28	1	9	9	27	0.821236	20.9671	0.825387	15.5566	0.688488	5.93191	283	30.6661	6.01123
O31457	ybfQ	UPF0176 protein YbfQ OS	47.83	1	14	14	35	0.939465	3.46654	0.919864	8.88544	0.687971	19.6582	322	37.2412	5.18604
O35025	ydiR	Type-2 restriction enzyme BsuMI component YdiR OS	14.38	1	2	2	2	0.897023	17.4451	0.804267	37.3474	0.687111	11.699	313	35.2896	4.66553
Q06797	rplA	50S ribosomal protein L1 OS	62.07	1	16	16	94	0.96064	7.85219	0.792588	11.6205	0.687096	15.1847	232	24.9732	9.37842
O34443	apt	Adenine phosphoribosyltransferase OS	58.82	1	10	10	25	0.912942	8.27058	0.88916	11.511	0.686515	9.48421	170	18.863	5.04639
O34412	ylbF	Regulatory protein YlbF OS	6.71	1	1	1	2	0.803611		0.765177		0.685158		149	16.9032	5.2749
O31755	proS	Proline--tRNA ligase OS	37.23	1	19	19	61	1.12676	8.46451	0.902135	9.99366	0.683485	16.5946	564	63.2651	5.30029
P46208	htpG	Chaperone protein HtpG OS	13.42	1	6	6	6	1.13102	10.5704	1.17627	21.9629	0.680224	18.4409	626	72.2123	4.97021
P94556	racE	Glutamate racemase 1 OS	25.37	1	4	4	14	0.965123	9.24104	0.84023	13.4213	0.678897	33.9383	272	29.9796	5.24951
Q05865	folC	Folylpolyglutamate synthase OS	2.09	1	1	1	1	0.914464		0.77308		0.678325		430	48.1347	6.25244
P25812	mnmG	tRNA uridine 5-carboxymethylaminomethyl modification enzyme MnmG OS	27.55	1	16	16	35	1.02999	10.5854	0.878378	18.3746	0.678065	22.6125	628	69.7092	6.771
O31590	cspR	Putative tRNA (cytidine(34)-2'-O)-methyltransferase OS	25	1	4	4	5	1.25822	27.0111	0.813642	5.15886	0.67801	14.399	160	18.5654	6.37939
Q795R8	ytfP	Uncharacterized protein YtfP OS	9.05	1	3	3	5	0.966504	21.934	0.982458	20.3129	0.675784	9.23167	420	46.0993	9.05615
Q06795	nusG	Transcription termination/antitermination protein NusG OS	66.67	1	9	9	36	0.934539	7.07959	0.902031	15.7792	0.675674	19.8934	177	20.1133	5.52881
P14204	comA	Transcriptional regulatory protein ComA OS	7.01	1	1	1	1	1.02703		1.01953		0.675327		214	24.1133	5.03369
Q45066	parC	DNA topoisomerase 4 subunit A OS	7.07	1	5	5	9	1.23905	5.8506	0.763123	4.94487	0.67499	7.34992	806	91.2633	6.771
P33166	tuf	Elongation factor Tu OS	84.34	1	30	30	416	1.05532	6.11734	0.801712	6.23722	0.67461	10.4996	396	43.5658	5.0083
C0H447	ypzJ	Uncharacterized protein YpzJ OS	27.94	1	2	2	3	0.829717	5.43689	0.722153	9.66367	0.674152	6.24582	68	7.40253	7.76709
Q04795	dapG	Aspartokinase 1 OS	20.05	1	6	6	9	0.996525	5.29965	1.02476	14.1642	0.673983	22.2826	404	42.9212	6.30322
P42963	ycsF	UPF0271 protein YcsF OS	5.84	1	1	1	2	0.827356	1.58259	0.844271	6.42729	0.673576	7.06485	257	27.465	5.97314
P37871	rpoC	DNA-directed RNA polymerase subunit beta' OS	52.38	1	60	60	179	1.39622	11.7796	0.82257	11.7411	0.673174	25.1468	1199	134.168	8.63135
P50743	der	GTPase Der OS	19.04	1	7	7	14	1.04643	6.68561	0.81098	9.23471	0.672993	13.0724	436	48.7391	5.57959
O35020	mnmA	tRNA-specific 2-thiouridylase MnmA OS	18.6	1	4	4	8	1.16698	7.38536	1.1616	12.5185	0.670904	22.0747	371	41.8916	5.13525
P37468	rsmA	Ribosomal RNA small subunit methyltransferase A OS	15.07	1	4	4	6	0.665703	26.3807	0.844599	5.45683	0.669118	24.5941	292	32.7005	6.06201
P54538	yqjA	Uncharacterized protein YqjA OS	3.73	1	1	1	1	0.776856		0.665268		0.668704		322	37.0078	8.646
P54452	yqeG	Uncharacterized protein YqeG OS	19.19	1	4	4	7	0.887903	8.98863	1.0209	20.1118	0.668438	15.3139	172	20.0747	9.59814
P32397	hemY	Protoporphyrinogen oxidase OS	13.83	1	5	5	9	1.0145	6.35105	0.840333	20.6545	0.66757	13.5373	470	51.1705	8.104
P12049	yexA	UPF0062 protein YexA OS	44.05	1	2	2	2	0.368411	9.46808	1.1458	10.222	0.666453	9.06155	84	9.74892	4.88135
O34348	yfmC	Fe(3+)-citrate-binding protein YfmC OS	48.89	1	12	12	26	0.705092	6.08569	0.737859	7.10239	0.666398	13.1217	315	34.9993	7.91357
O34526	alaS	Alanine--tRNA ligase OS	38.27	1	25	25	65	1.05991	8.75898	0.836695	8.54541	0.666105	16.1653	878	97.2195	5.19873
Q04747	srfAB	Surfactin synthase subunit 2 OS	6.92	1	15	18	23	0.857835	6.2857	0.712776	16.9914	0.663622	21.5637	3583	400.693	5.17334
O34707	ytpB	Tetraprenyl-beta-curcumene synthase OS	3.54	1	1	1	1	0.685147		1.2693		0.663611		367	42.8152	6.20166
O34946	znuC	Probable zinc transport system ATP-binding protein AdcC OS	6.06	1	1	1	2	0.807973	1.81798	0.541914	2.47559	0.661854	1.14629	231	26.3025	8.23584
P42176	narH	Nitrate reductase beta chain OS	5.95	1	2	2	3	1.42346	27.19	0.572572	32.082	0.661545	27.2889	487	55.436	5.42725
O31761	ymfC	Uncharacterized HTH-type transcriptional regulator YmfC OS	5.81	1	1	1	1	0.943586		1.13646		0.661237		241	27.8795	6.85889
O32117	yutJ	NADH dehydrogenase-like protein YutJ OS	15.21	1	6	6	9	0.88251	5.91447	0.921999	8.40284	0.660715	18.997	355	39.5795	6.53662
O34607	sdaAA	Probable L-serine dehydratase, alpha chain OS	31.33	1	7	7	16	0.940499	7.33151	1.01717	10.3256	0.660009	22.259	300	30.9156	5.10986
O34835	fapR	Transcription factor FapR OS	4.79	1	1	1	1	1.12095		0.930621		0.658479		188	21.3874	5.70654
O31798	ymzA	Uncharacterized protein YmzA OS	11.84	1	1	1	1	1.20865		1.00769		0.658232		76	8.68526	4.60205
O32038	aspS	Aspartate--tRNA ligase OS	29.39	1	17	17	46	0.949262	6.01058	0.840674	14.5496	0.656607	17.2062	592	65.9336	4.95752
P21458	spoIIIE	DNA translocase SpoIIIE OS	3.94	1	3	3	4	0.934048	3.99017	0.845723	20.0013	0.65646	1.22442	787	87.1258	7.37158
P30950	hemB	Delta-aminolevulinic acid dehydratase OS	57.41	1	16	16	42	1.11292	11.0979	0.845072	11.1186	0.656316	16.1991	324	36.1862	5.30029
P35154	scpA	Segregation and condensation protein A OS	2.79	1	1	1	1	1.01723		0.883427		0.656101		251	29.5934	5.03369
P49778	efp	Elongation factor P OS	38.92	1	5	5	12	1.05659	5.59109	0.908911	13.5472	0.654631	10.8176	185	20.4554	5.12256
P34956	qoxB	Quinol oxidase subunit 1 OS	9.4	1	7	7	37	0.882232	15.6131	0.858012	18.9797	0.6545	16.1771	649	73.7886	8.73389
Q01465	mreB	Rod shape-determining protein MreB OS	49.26	1	15	15	55	0.842082	4.88192	0.77334	5.81394	0.653387	13.689	337	35.8937	5.21143
P23973	menF	Menaquinone-specific isochorismate synthase OS	13.59	1	5	5	8	1.08825	6.90157	0.904517	25.9126	0.653078	21.4633	471	52.7787	4.97021
O32039	hisS	Histidine--tRNA ligase OS	40.8	1	14	14	27	0.916368	6.41033	0.792627	9.99265	0.651367	17.2059	424	48.1013	5.52881
P39148	glyA	Serine hydroxymethyltransferase OS	49.4	1	17	17	70	1.03339	5.97021	0.972279	8.12666	0.650532	8.77966	415	45.4612	5.87158
O34478	yccF	Uncharacterized protein YccF OS	41.34	1	9	9	15	0.990811	11.7757	0.809221	10.2247	0.649913	11.8964	358	40.0124	5.23682
P17904	rsbW	Serine-protein kinase RsbW OS	38.75	1	6	6	7	0.885633	6.15554	0.754379	11.7066	0.647852	23.3874	160	17.9817	4.61475
O31727	ylmE	UPF0001 protein YlmE OS	5.22	1	1	1	1	0.932891		0.808047		0.645396		230	25.688	5.89697
O31502	dagK	Diacylglycerol kinase OS	5.94	1	2	2	3	0.91606	6.48256	0.869904	9.36274	0.643455	11.531	303	33.3163	6.04932
O34612	yjlB	Uncharacterized protein YjlB OS	12.73	1	1	1	1	1.10823		0.495134		0.643119		165	18.3244	7.7085
Q04805	ymxG	Uncharacterized zinc protease YmxG OS	18.09	1	5	5	6	0.830963	8.84576	0.770818	8.1652	0.641676	13.533	409	45.9659	5.60498
P19947	rpmD	50S ribosomal protein L30 OS	59.32	1	5	5	34	0.622353	13.5577	0.847047	12.6815	0.641604	22.315	59	6.63368	10.272
O31740	rimM	Ribosome maturation factor RimM OS	22.41	1	3	3	7	1.37503	8.16699	0.819712	21.4169	0.641051	28.6852	174	20.1906	5.47803
P70974	rplM	50S ribosomal protein L13 OS	53.79	1	7	7	103	0.881562	10.2855	0.881501	5.18339	0.640263	17.1125	145	16.3647	9.87646
O34632	sirB	Sirohydrochlorin ferrochelatase OS	13.41	1	2	2	2	1.09602	9.37868	0.974108	16.8606	0.639561		261	28.8169	6.52197
P22326	tyrS1	Tyrosine--tRNA ligase 1 OS	62.09	1	19	19	50	1.03955	17.0702	0.912684	18.1306	0.639079	19.3619	422	47.7075	5.51611
O32034	yrrO	Uncharacterized protease YrrO OS	17.77	1	6	6	10	1.03571	10.5025	0.976143	17.259	0.636042	20.5198	422	47.5987	5.14795
P54174	ypkP	Uncharacterized protein YpkP OS	5.34	1	1	1	1	1.28222		0.790065		0.63407		206	23.3263	7.48877
P17893	argR	Arginine repressor OS	6.04	1	1	1	1	0.98128		0.76146		0.633709		149	16.8216	5.92236
P37877	ackA	Acetate kinase OS	65.06	1	20	20	110	0.96541	6.31243	0.806012	7.07901	0.633514	8.83373	395	43.1103	5.50342
O31546	dus2	Probable tRNA-dihydrouridine synthase 2 OS	15.08	1	3	3	3	0.991843	9.94	0.742551	18.2226	0.633453	20.2992	325	36.9668	5.73193
P50621	nrdF	Ribonucleoside-diphosphate reductase subunit beta OS	34.35	2	8	8	15	0.89072	18.6907	0.831688	20.2306	0.631625	9.1083	329	38.354	4.95752
O34847	accA	Acetyl-coenzyme A carboxylase carboxyl transferase subunit alpha OS	24.92	1	7	7	18	1.04026	8.07879	0.902403	9.90157	0.630851	20.2706	325	36.3108	6.55127
P08750	dacA	D-alanyl-D-alanine carboxypeptidase DacA OS	35.89	1	18	18	36	0.98532	5.05624	0.738835	9.93092	0.629384	14.7069	443	48.6056	6.04932
O34454	ykaA	UPF0111 protein YkaA OS	26.34	1	6	6	9	1.11008	5.20451	0.804885	14.0961	0.628173	17.8061	205	23.8292	5.18604
P21203	pheA	Prephenate dehydratase OS	9.12	1	2	2	3	0.968047	24.5728	1.00004	18.9431	0.62707	14.3481	285	31.8812	6.354
P37585	murG	UDP-N-acetylglucosamine--N-acetylmuramyl-(pentapeptide) pyrophosphoryl-undecaprenol N-acetylglucosamine transferase OS	37.47	1	11	11	27	0.90563	7.46594	0.795091	9.1289	0.626926	18.8232	363	39.9113	9.14404
P13485	tagF	CDP-glycerol:poly(glycerophosphate) glycerophosphotransferase OS	17.43	1	12	12	18	1.19224	9.33009	0.685923	7.65818	0.626057	10.5391	746	88.0075	9.1001
P12046	purC	Phosphoribosylaminoimidazole-succinocarboxamide synthase OS	4.98	1	1	1	1	0.605344		0.948352		0.624739		241	27.4433	5.16064
P12875	rplN	50S ribosomal protein L14 OS	30.33	1	5	5	10	1.00905	10.6139	0.857786	16.048	0.624067	23.0414	122	13.1461	9.92041
P35155	scpB	Segregation and condensation protein B OS	12.69	1	2	2	3	0.94869	2.85763	0.732399	19.7033	0.623787	4.2588	197	22.0245	4.52588
P54515	yqhQ	Uncharacterized protein YqhQ OS	6.6	1	1	1	1	1.11992		0.857058		0.623762		318	35.9194	8.80713
P54182	ypoP	Uncharacterized HTH-type transcriptional regulator YpoP OS	9.22	1	1	1	1	1.17948		1.0841		0.62281		141	16.856	8.92432
Q03221	tdk	Thymidine kinase OS	9.74	1	1	1	2	1.55494	64.5931	0.61869	34.1222	0.622736	49.1087	195	21.4367	6.11279
P42305	dbpA	ATP-dependent RNA helicase DbpA OS	4.18	1	2	2	2	1.02206		0.813022		0.622504		479	54.0143	7.82568
P49787	accC1	Biotin carboxylase 1 OS	35.56	1	13	13	40	1.16396	8.39439	0.830092	7.62812	0.621934	20.5421	450	49.421	4.93213
P80700	tsf	Elongation factor Ts OS	61.43	1	18	18	144	1.04522	13.1205	0.820073	13.4872	0.621449	18.4974	293	32.3335	5.24951
P54380	glyQ	Glycine--tRNA ligase alpha subunit OS	22.03	1	7	7	25	1.0601	4.70947	0.778311	12.9938	0.62112	15.9665	295	33.9577	5.09717
O32037	tcdA	Uncharacterized protein YrvM OS	14.57	1	3	3	9	0.916531	6.97029	0.709572	14.5493	0.620309	11.5881	254	28.0659	7.86963
O32169	metN	Methionine import ATP-binding protein MetN OS	14.66	1	4	4	8	0.843224	10.1055	0.650552	11.1853	0.619768	14.5349	341	37.8621	7.56201
P28822	sul	Dihydropteroate synthase OS	17.89	1	4	4	7	1.1351	5.59051	0.896668	6.4151	0.619305	30.5411	285	30.9818	5.77002
C0SP94	yhfQ	Putative ABC transporter substrate-binding lipoprotein YhfQ OS	28.48	1	9	9	22	0.644974	11.063	0.762411	10.1302	0.619235	15.9544	323	35.4668	9.0415
O34529	pfkA	6-phosphofructokinase OS	49.53	1	12	12	47	1.13072	12.2386	0.917864	10.4653	0.618185	11.7273	319	34.2329	6.60986
O32129	lipA	Lipoyl synthase OS	26.85	1	6	6	13	1.16161	5.0068	0.980383	13.3158	0.617898	11.5343	298	33.8994	8.32373
P12039	purD	Phosphoribosylamine--glycine ligase OS	12.56	1	4	4	6	0.715004	12.785	0.909852	14.3231	0.616336	17.9258	422	45.252	4.88135
O31744	rnhB	Ribonuclease HII OS	3.53	1	1	1	1	1.01734		0.807668		0.616106		255	28.3367	5.8335
P16524	patA	Putative N-acetyl-LL-diaminopimelate aminotransferase OS	15.01	1	5	5	6	1.11418	4.94201	0.889724	10.4093	0.615887	11.4452	393	43.5084	6.46826
O35033	coaBC	Probable coenzyme A biosynthesis bifunctional protein CoaBC OS	8.87	1	3	3	4	1.1457	10.6494	0.785962	12.01	0.615319	30.2061	406	43.9499	6.46826
O34680	ydiP	Probable BsuMI modification methylase subunit YdiP OS	9.51	1	2	2	2	0.70553	19.9281	0.854935	2.44483	0.615046	42.301	389	43.2572	6.87354
P37470	spoVC	Peptidyl-tRNA hydrolase OS	13.83	1	2	2	5	1.09863	6.47326	0.823715	11.5491	0.611914	9.15108	188	20.8587	5.96045
P32436	degV	Protein DegV OS	13.52	1	3	3	8	1.04332	15.0055	0.72877	11.0739	0.611658	19.8046	281	31.5601	5.52881
P39772	asnS	Asparagine--tRNA ligase OS	58.37	1	21	21	63	1.02735	7.17177	0.844795	10.7981	0.607593	9.02017	430	49.0529	5.41455
P16618	hemA	Glutamyl-tRNA reductase OS	3.52	1	2	2	2	0.934139	9.52238	0.738862	7.61021	0.60755	19.5803	455	50.8116	5.60498
P39788	nth	Endonuclease III OS	4.57	1	1	1	1	1.10605		0.831425		0.606368		219	24.9842	9.05615
P28367	prfB	Peptide chain release factor 2 OS	20.77	1	7	7	9	1.18491	10.2522	0.757319	19.0047	0.604347	24.1886	366	42.0469	5.13525
P54374	aroD	Shikimate dehydrogenase OS	8.21	1	2	2	3	0.862001	10.9257	0.793058	14.8455	0.60268	25.4112	280	30.5889	6.53662
P96614	cshA	DEAD-box ATP-dependent RNA helicase CshA OS	40.28	1	18	18	55	1.30097	5.98714	0.766764	8.31155	0.60105	17.3724	494	55.2959	9.49561
P70998	speE	Spermidine synthase OS	45.29	1	12	12	28	0.835027	11.9028	0.699801	21.5401	0.600917	26.4544	276	31.3159	5.41455
Q795Y4	yrhE	Putative formate dehydrogenase YrhE OS	5.71	1	3	3	4	1.33071	5.27888	1.01727	1.7654	0.598807	23.3051	980	108.706	5.49072
P96499	yvhJ	Putative transcriptional regulator YvhJ OS	4.35	1	1	1	2	0.889186		0.961881		0.598622		391	43.1849	8.79248
P20166	ptsG	PTS system glucose-specific EIICBA component OS	16.6	1	10	10	30	0.841038	7.29289	0.701256	9.85014	0.598595	14.9727	699	75.4769	5.75732
P35156	ypuI	Uncharacterized protein YpuI OS	15.64	1	2	2	2	0.993789	4.92334	0.823986	15.5162	0.597702	84.6116	179	20.3379	5.8208
O31646	manA	Mannose-6-phosphate isomerase ManA OS	55.24	1	15	15	42	1.20074	11.1693	0.823571	13.7799	0.595652	18.1157	315	35.98	5.63037
O32035	yrrN	Uncharacterized protease YrrN OS	14.89	1	3	3	4	1.25011	6.2329	0.896872	3.82964	0.594414	14.9786	309	35.0566	4.91943
P55873	rplT	50S ribosomal protein L20 OS	37.82	1	6	6	24	0.968617	12.804	0.980779	13.0952	0.593039	31.4184	119	13.6295	11.4292
P24277	recR	Recombination protein RecR OS	4.55	1	1	1	1	1.01857		1.42214		0.592787		198	21.9603	5.65576
P50620	nrdE	Ribonucleoside-diphosphate reductase subunit alpha OS	26	2	15	15	31	1.14953	6.87469	0.816403	16.1166	0.591311	31.1814	700	80.637	6.37939
P21476	rpsS	30S ribosomal protein S19 OS	61.96	1	9	9	100	0.724905	25.253	0.763389	14.7384	0.590159	17.1625	92	10.5766	10.1108
O34896	uxuB	Uncharacterized oxidoreductase UxuB OS	6.83	1	1	1	1	0.854909		0.252053		0.589565		278	29.4618	5.60498
Q05873	valS	Valine--tRNA ligase OS	48.41	1	39	39	111	1.09792	6.67141	0.844195	11.6283	0.588861	16.6627	880	101.681	5.18604
P37469	dnaC	Replicative DNA helicase OS	1.98	1	1	1	1	0.797047		0.747606		0.587969		454	50.5449	4.88135
P39579	dltC	D-alanine--poly(phosphoribitol) ligase subunit 2 OS	37.18	1	2	2	3	0.600676	7.13535	0.815942	6.08582	0.586152	3.62272	78	9.00353	3.99268
Q45598	yydD	Uncharacterized protein YydD OS	3.92	1	2	2	2	1.15475	3.39431	1.18181	9.2126	0.58516	12.3247	586	69.0638	6.99072
O05496	ydhE	Uncharacterized UDP-glucosyltransferase YdhE OS	12.66	1	4	4	9	1.13535	9.62834	0.726376	9.54577	0.584735	16.3851	395	44.5168	5.51611
O34790	pcrB	Heptaprenylglyceryl phosphate synthase OS	4.82	1	1	1	2	0.860138	21.0666	0.859264	24.0655	0.584107	34.3159	228	25.0715	4.53857
P96712	bmr3	Multidrug resistance protein 3 OS	6.64	1	2	2	2	0.716709	26.2663	0.562931	11.0515	0.582115	25.0242	512	55.6523	9.56885
P13714	ldh	L-lactate dehydrogenase OS	30.94	1	11	11	26	1.02237	6.47798	0.688594	7.7089	0.581853	13.6445	320	34.7798	5.78271
P51831	fabG	3-oxoacyl-[acyl-carrier-protein] reductase FabG OS	61.79	1	12	12	37	1.00643	6.78129	0.711012	9.15013	0.580691	16.1669	246	26.2655	8.06006
P13484	tagE	Probable poly(glycerol-phosphate) alpha-glucosyltransferase OS	6.39	1	4	4	5	1.81549	56.0459	1.20404	71.3172	0.58067	17.8117	673	78.2549	6.46826
P18255	thrS	Threonine--tRNA ligase 1 OS	37.79	1	21	21	46	1.0914	8.29052	0.792149	16.5956	0.580318	21.3998	643	73.4685	5.52881
O34512	yfmM	Uncharacterized ABC transporter ATP-binding protein YfmM OS	23.17	1	11	11	13	1.04016	8.97039	0.662231	8.94883	0.577156	15.6571	518	59.1734	5.38916
P17631	dnaJ	Chaperone protein DnaJ OS	21.6	1	6	6	14	1.07389	9.23645	0.780257	16.6323	0.576948	20.3677	375	41.0194	7.86963
P39071	dhbA	2,3-dihydro-2,3-dihydroxybenzoate dehydrogenase OS	27.59	1	6	6	13	1.15041	7.75456	0.867343	13.268	0.575636	13.1781	261	27.4369	5.64307
O32247	yvbJ	Uncharacterized membrane protein YvbJ OS	4.13	1	2	2	2	0.715859	6.10955	0.664693	17.9919	0.575409	25.4042	605	67.2332	5.19873
P14192	glmU	Bifunctional protein GlmU OS	23.03	1	8	8	28	0.930065	6.60354	0.830102	14.6964	0.575038	24.2098	456	49.5795	6.30322
P12044	purE	N5-carboxyaminoimidazole ribonucleotide mutase OS	19.75	1	2	2	3	0.812822	16.383	1.02083	16.2654	0.573836	24.2871	162	17.1629	5.5415
P21473	rpsO	30S ribosomal protein S15 OS	49.44	1	4	4	40	0.916694	20.2282	0.948901	18.9632	0.570524	36.9565	89	10.5667	10.521
O05518	tsaD	Probable tRNA threonylcarbamoyladenosine biosynthesis protein Gcp OS	11.27	1	3	3	4	0.778108	10.932	0.861624	8.64373	0.570001	12.1142	346	36.819	5.31299
P54420	asnB	Asparagine synthetase [glutamine-hydrolyzing] 1 OS	38.13	1	19	19	51	1.0481	6.37845	0.799691	8.96891	0.569018	15.5474	632	72.6199	6.03662
P71036	ywnA	Putative HTH-type transcriptional regulator YwnA OS	25.56	1	3	3	3	0.752748	27.0327	0.633785	1.50416	0.567024	23.5636	133	14.7018	7.43018
O34340	fabF	3-oxoacyl-[acyl-carrier-protein] synthase 2 OS	48.67	1	14	14	39	1.03482	6.30168	0.728756	10.2412	0.566325	22.9056	413	43.977	5.08447
P37948	glpT	Glycerol-3-phosphate transporter OS	5.41	1	2	2	4	0.999809	6.77415	0.98895	17.8649	0.564003	25.277	444	49.7689	9.17334
Q99027	comP	Sensor histidine kinase ComP OS	1.82	1	1	1	1	0.703614		0.579902		0.561326		769	89.2514	8.1626
P12048	purH	Bifunctional purine biosynthesis protein PurH OS	27.54	1	11	11	18	0.656652	14.7385	0.978989	16.9869	0.55719	26.3767	512	55.719	5.43994
O34530	rsgA	Putative ribosome biogenesis GTPase RsgA OS	4.7	1	2	2	3	1.17936		0.774906		0.556145		298	33.776	5.05908
P94364	cydA	Cytochrome d ubiquinol oxidase subunit 1 OS	1.71	1	1	1	1	1.0657		0.719412		0.554912		468	52.2581	8.71924
P49938	fhuC	Iron(3+)-hydroxamate import ATP-binding protein FhuC OS	14.5	1	2	2	2	0.707697	10.0341	0.696538	10.5104	0.554686	9.16488	269	29.9357	6.96143
P96723	ywqK	Uncharacterized protein YwqK OS	9.09	1	1	1	1	1.31529		0.759987		0.552662		154	18.2057	4.7417
Q08788	srfAD	Surfactin synthase thioesterase subunit OS	8.26	1	1	1	2	0.773284	5.87822	0.555521	50.4025	0.551787	24.5523	242	27.6029	5.57959
O31751	uppS	Isoprenyl transferase OS	8.08	1	1	1	1	1.01275		1.10032		0.551615		260	29.7584	5.71924
P50831	ypvA	Probable ATP-dependent helicase YpvA OS	7.18	1	3	3	5	1.04339	16.9014	0.698954	14.0033	0.550296	11.1117	641	74.2531	4.88135
Q795M6	yugH	Putative aminotransferase YugH OS	6.74	1	2	2	2	0.838622	4.28827	0.750094	5.13891	0.549861	0.374772	386	42.2833	5.37646
P21477	rpsT	30S ribosomal protein S20 OS	26.14	1	3	3	11	0.753709	7.3334	1.01388	16.2606	0.54986	15.8314	88	9.59333	10.9312
Q03523	murE	UDP-N-acetylmuramoyl-L-alanyl-D-glutamate--2,6-diaminopimelate ligase OS	37.04	1	14	14	24	1.02402	9.74	0.736746	13.0358	0.548746	17.2922	494	54.2915	5.98584
P80876	yfkM	General stress protein 18 OS	6.4	1	1	1	1	0.648085		0.585042		0.548011		172	18.8516	5.07178
P29726	purA	Adenylosuccinate synthetase OS	26.05	1	10	10	18	1.11685	20.8401	0.764557	17.93	0.547844	24.0408	430	47.8807	5.94775
Q45477	ileS	Isoleucine--tRNA ligase OS	32.46	1	27	27	66	1.16353	10.6354	0.735681	11.0022	0.547228	24.827	921	104.779	5.51611
P39597	efeN	Probable deferrochelatase/peroxidase EfeN OS	9.62	1	3	3	3	0.916822	10.6062	0.834608	13.4076	0.542188	16.8047	416	45.664	8.54346
P40778	murC	UDP-N-acetylmuramate--L-alanine ligase OS	25.46	1	9	9	29	1.03183	6.56465	0.71381	12.9383	0.54165	16.0731	432	48.334	5.70654
P54616	fabI	Enoyl-[acyl-carrier-protein] reductase [NADH] FabI OS	51.16	1	11	11	55	0.910617	6.13374	0.64929	19.0677	0.541336	18.0265	258	27.8562	6.01123
P80874	yhdN	General stress protein 69 OS	5.14	1	1	1	1	0.700597		0.398425		0.540121		331	37.289	5.05908
P71018	plsX	Phosphate acyltransferase OS	35.14	1	8	8	23	0.91827	6.38279	0.64946	4.62428	0.53809	16.031	333	35.7406	5.88428
P19994	map	Methionine aminopeptidase 1 OS	28.23	1	7	7	13	1.02279	10.9133	0.996126	8.73036	0.536265	30.2443	248	27.3922	6.85889
P0CI73	glmS	Glutamine--fructose-6-phosphate aminotransferase [isomerizing] OS	30.33	1	15	15	44	0.923231	11.6745	0.789287	16.689	0.530708	22.2207	600	65.2967	5.09717
P12042	purL	Phosphoribosylformylglycinamidine synthase 2 OS	3.1	1	2	2	2	0.548605	34.3792	0.820904	13.415	0.527344	23.5518	742	80.2743	4.83057
P45744	dhbC	Isochorismate synthase DhbC OS	25.13	1	7	7	14	1.30458	15.8375	0.88224	18.6014	0.52529	31.4506	398	43.4091	5.49072
P45868	maeA	Probable NAD-dependent malic enzyme 2 OS	3.61	1	2	2	2	1.11847	13.9316	1.02933	7.81134	0.524666	19.2689	582	64.0633	5.18604
P54461	rsmE	Ribosomal RNA small subunit methyltransferase E OS	24.22	1	4	4	8	1.07498	14.8159	0.811453	14.5335	0.524595	20.6753	256	28.7837	5.56689
P0CI79	thyA1	Thymidylate synthase 1 OS	16.49	1	3	3	7	1.19495	14.6163	0.969675	28.3316	0.522406	57.4723	279	32.7864	5.93506
P14193	prs	Ribose-phosphate pyrophosphokinase OS	35.65	1	11	11	35	0.933467	11.9775	0.741848	9.8723	0.52129	24.3788	317	34.8464	6.32861
O07631	typA	GTP-binding protein TypA/BipA homolog OS	45.42	1	20	20	75	0.944503	9.49418	0.621043	14.2485	0.521112	21.1093	612	68.346	5.26221
P55189	ybaR	Putative sulfate transporter YbaR OS	2.3	1	1	1	1	0.891141		0.814679		0.518495		478	51.1405	7.95752
P55874	rpmI	50S ribosomal protein L35 OS	46.97	1	5	5	15	0.808454	9.62142	1.4773	13.7427	0.515629	26.675	66	7.55227	12.0444
O31645	manP	PTS system mannose-specific EIIBCA component OS	28.92	1	18	18	53	0.913453	6.38495	0.739048	6.17222	0.515368	21.4562	650	68.9817	6.68311
P39751	mbl	MreB-like protein OS	36.34	1	11	11	29	0.841709	6.36444	0.715492	7.42872	0.512789	15.3302	333	35.8381	6.03662
Q795J3	epsN	Putative pyridoxal phosphate-dependent aminotransferase EpsN OS	5.67	1	1	1	1	1.23576		0.582439		0.51222		388	42.8969	6.29053
O34426	speH	S-adenosylmethionine decarboxylase proenzyme OS	25.4	1	4	4	7	0.716201	7.3299	0.559792	10.3272	0.509173	32.2768	126	13.8639	5.09717
P45743	dhbB	Isochorismatase OS	22.76	1	6	6	17	1.1483	9.01634	0.81977	6.53311	0.508511	12.5942	312	35.0846	4.75439
O32054	queA	S-adenosylmethionine:tRNA ribosyltransferase-isomerase OS	39.18	1	13	13	27	0.976897	8.17207	0.812262	14.3854	0.505376	21.5393	342	38.4876	5.32568
O34400	yfkA	Putative protein YfkA OS	5.63	1	1	1	2	0.840826	1.81798	0.855735	2.47559	0.502491	1.14629	373	43.2297	6.34131
P54504	rsbRD	RsbT co-antagonist protein RsbRD OS	6.47	1	1	1	1	0.941045		0.64124		0.497362		278	31.8145	5.30029
Q07836	wapI	Uncharacterized protein YxxG OS	8.45	1	1	1	1	1.00632		0.62019		0.496246		142	16.4185	4.70361
P25993	pyrAA	Carbamoyl-phosphate synthase pyrimidine-specific small chain OS	4.67	1	1	1	1	0.851805		0.686438		0.494094		364	40.0935	6.25244
O31741	trmD	tRNA (guanine-N(1)-)-methyltransferase OS	8.23	1	2	2	2	1.0425	4.23745	0.66324	3.54065	0.491817	3.3183	243	27.6911	5.65576
O34617	rlmN	Probable dual-specificity RNA methyltransferase RlmN OS	7.16	1	3	3	3	1.02145	6.09568	0.681984	10.9978	0.491721	25.9819	363	41.5433	7.18115
P54552	proI	Pyrroline-5-carboxylate reductase 2 OS	15.11	1	3	3	5	0.775035	12.076	0.618576	11.3222	0.489967	5.73042	278	30.3769	7.12256
P55341	ecsC	Protein EcsC OS	8.47	1	1	1	1	0.693411		0.676347		0.489645		236	26.6951	8.76318
P80868	fusA	Elongation factor G OS	70.52	1	40	40	346	1.22114	7.11887	0.685918	7.37752	0.488099	13.7032	692	76.5685	4.88135
O05269	guaC	GMP reductase OS	48.16	1	10	10	17	1.05598	13.9302	1.00042	19.9605	0.485396	31.6639	326	35.8272	6.53662
P54453	yqeH	Uncharacterized protein YqeH OS	25.14	1	6	6	16	0.987306	13.2441	0.700699	27.008	0.483936	31.5125	366	40.9733	6.46826
O34453	nos	Nitric oxide synthase oxygenase OS	3.03	1	1	1	1	0.909609		0.786796		0.482724		363	41.8771	5.45264
P25995	pyrC	Dihydroorotase OS	20.33	1	7	7	11	1.09623	10.2222	0.782842	12.6752	0.481951	17.0044	428	46.5035	5.51611
P49849	mutS	DNA mismatch repair protein MutS OS	1.05	1	1	1	1	0.995739		0.765858		0.481669		858	97.5423	5.5542
P39581	dltA	D-alanine--poly(phosphoribitol) ligase subunit 1 OS	33.6	1	14	14	51	1.11664	10.9352	0.642784	30.023	0.478687	52.6515	503	55.7731	5.21143
P13267	polC	DNA polymerase III PolC-type OS	2.3	1	3	3	4	1.25118	27.4589	0.89906	19.2968	0.474758	18.1589	1437	162.561	5.46533
Q03522	murD	UDP-N-acetylmuramoylalanine--D-glutamate ligase OS	31.04	1	13	13	36	0.984563	9.51669	0.668842	7.97418	0.47439	17.9096	451	49.6196	5.97314
P23970	menD	2-succinyl-5-enolpyruvyl-6-hydroxy-3-cyclohexene-1-carboxylate synthase OS	8.97	1	3	3	4	1.0991	9.2462	0.649068	0.734146	0.466923	28.9785	580	64.0516	6.1001
P54458	yqeM	Putative methyltransferase YqeM OS	6.48	1	1	1	1	0.791682		0.731643		0.466641		247	28.3117	4.58936
O34347	argG	Argininosuccinate synthase OS	2.48	1	1	1	1	1.16873		1.04311		0.464164		403	44.7892	5.31299
O06968	yvcD	TPR repeat-containing protein YvcD OS	3.1	1	1	1	1	0.825332		0.76909		0.45785		484	55.3404	4.95752
Q796V8	hemZ	Oxygen-independent coproporphyrinogen-III oxidase 2 OS	14.77	1	6	6	6	1.11865	7.35767	0.721964	10.3317	0.454243	3.6182	501	57.4901	6.354
[truncated: 37 more rows]

## Sheet: QTOF-peptide
Accession	Description	ΣCoverage	Σ# Proteins	Σ# Unique Peptides	Σ# Peptides	Σ# PSMs	115/114	115/114 Variability [%]	116/114	116/114 Variability [%]	117/114	117/114 Variability [%]	# AAs	MW [kDa]	calc. pI
[truncated: 5,597 more rows]

[truncated: 2 more sheets: QtOF-protein, Orbitrap Vs QTOF]
